# Supplementary material for: Development and validation of an intra-tumor heterogeneity-related signature to predict prognosis of bladder cancer: a study based on single-cell RNA-seq
Source: Aging (Albany NY). 2021 Aug 2;13(15):19415–41. doi: 10.18632/aging.203353 (PMC8386527; doi:10.18632/aging.203353)
Supplement: Supplementary Table 1 [file aging-13-203353-s002.xls]

## Sheet: BLCA_MATH
Supplementary Table 1. The evaluated MATH value of each individual from TCGA-BLCA cohort.
Sample_ID	clusters	MATH
TCGA-DK-A6AW-01A	4	15.7831
TCGA-KQ-A41N-01A	5	19.2545
TCGA-K4-A54R-01A	3	23.1656
TCGA-MV-A51V-01A	4	55.9813
TCGA-YC-A89H-01A	2	25.2802
TCGA-DK-A1AC-01A	3	50.2922
TCGA-DK-A3WW-01A	2	23.5151
TCGA-BT-A2LB-01A	3	45.7097
TCGA-SY-A9G5-01A	3	46.5129
TCGA-XF-AAMG-01A	3	59.9349
TCGA-FD-A6TC-01A	2	59.6874
TCGA-E7-A7XN-01A	2	27.3749
TCGA-ZF-A9RC-01A	3	50.4084
TCGA-G2-A2EO-01A	3	49.4403
TCGA-DK-A2I4-01A	3	35.5637
TCGA-DK-A6B6-01A	2	33.9763
TCGA-DK-A3X1-01A	3	46.279
TCGA-UY-A78K-01A	3	40.9299
TCGA-DK-A2I1-01A	5	32.2877
TCGA-K4-A6FZ-01A	3	44.3771
TCGA-XF-A9T0-01A	2	37.065
TCGA-KQ-A41R-01A	2	59.5212
TCGA-G2-A3VY-01A	3	60.6454
TCGA-G2-AA3B-01A	5	73.0153
TCGA-GD-A3OP-01A	3	39.3343
TCGA-XF-A9T8-01A	4	36.3207
TCGA-ZF-A9R7-01A	3	33.183
TCGA-XF-A9T5-01A	2	56.2051
TCGA-ZF-AA51-01A	2	48.2795
TCGA-GC-A4ZW-01A	4	51.4243
TCGA-S5-A6DX-01A	2	34.4951
TCGA-DK-AA71-01A	3	49.3153
TCGA-BT-A0YX-01A	2	25.6453
TCGA-ZF-AA4V-01A	2	44.7823
TCGA-ZF-AA4X-01A	3	62.0623
TCGA-DK-A1A3-01A	3	52.3022
TCGA-E5-A4U1-01A	4	65.7097
TCGA-G2-A2EJ-01A	4	69.9213
TCGA-DK-AA6S-01A	3	37.9074
TCGA-XF-A9ST-01A	3	64.2865
TCGA-4Z-AA7W-01A	2	50.1017
TCGA-ZF-AA4W-01A	2	37.7107
TCGA-E7-A7DV-01A	4	49.6047
TCGA-UY-A9PB-01A	2	41.6981
TCGA-2F-A9KO-01A	2	44.2923
TCGA-4Z-AA7M-01A	2	52.5087
TCGA-K4-A83P-01A	3	42.8928
TCGA-LT-A5Z6-01A	4	88.4277
TCGA-XF-AAML-01A	2	44.1243
TCGA-BT-A3PJ-01A	3	51.4044
TCGA-FD-A3SS-01A	4	81.2821
TCGA-XF-A8HD-01A	3	50.4573
TCGA-BT-A20J-01A	2	51.255
TCGA-E7-A541-01A	3	43.6489
TCGA-H4-A2HQ-01A	3	59.2376
TCGA-GV-A3JZ-01A	2	60.4046
TCGA-GV-A3QI-01A	3	65.9572
TCGA-DK-AA6U-01A	3	75.5414
TCGA-E5-A4TZ-01A	5	71.5075
TCGA-4Z-AA84-01A	3	59.6891
TCGA-BT-A3PH-01A	3	31.2256
TCGA-G2-A2ES-01A	2	26.502
TCGA-UY-A9PF-01A	2	43.0432
TCGA-DK-AA75-01A	3	54.9542
TCGA-DK-A2I2-01A	4	25.1431
TCGA-XF-AAN2-01A	2	23.8308
TCGA-XF-A9SY-01A	2	48.275
TCGA-GD-A2C5-01A	3	40.386
TCGA-DK-A3IT-01A	3	47.5987
TCGA-E7-A6MD-01A	2	52.7463
TCGA-XF-AAN0-01A	1	35.9724
TCGA-E7-A85H-01A	2	67.6563
TCGA-DK-AA6L-01A	2	42.6247
TCGA-4Z-AA80-01A	3	66.8978
TCGA-XF-A8HE-01A	2	34.8816
TCGA-FJ-A3ZE-01A	2	34.7126
TCGA-FD-A43P-01A	2	48.4236
TCGA-GU-A767-01A	4	64.3795
TCGA-FD-A6TG-01A	3	54.6221
TCGA-FD-A62P-01A	3	54.2782
TCGA-XF-A9T3-01A	3	46.154
TCGA-DK-A3IU-01A	3	42.0985
TCGA-DK-A3IN-01A	2	41.7834
TCGA-GC-A6I3-01A	5	41.4256
TCGA-K4-A5RH-01A	2	43.7177
TCGA-BT-A3PK-01A	4	52.4635
TCGA-BT-A42C-01A	3	85.4819
TCGA-HQ-A5NE-01A	2	68.2397
TCGA-H4-A2HO-01A	4	30.8875
TCGA-FD-A3SN-01A	2	28.6482
TCGA-G2-A3IE-01A	2	44.6132
TCGA-2F-A9KT-01A	2	33.7666
TCGA-DK-AA6R-01A	2	44.9516
TCGA-XF-A9SI-01A	3	42.1427
TCGA-UY-A9PH-01A	3	53.8622
TCGA-4Z-AA7R-01A	2	55.8324
TCGA-DK-AA77-01A	2	25.3964
TCGA-K4-A5RJ-01A	2	36.6411
TCGA-FD-A5BX-01A	2	28.4556
TCGA-FD-A3SO-01A	2	33.7477
TCGA-UY-A8OB-01A	2	39.1055
TCGA-GC-A3RC-01A	2	47.9665
TCGA-ZF-A9RL-01A	3	47.7028
TCGA-DK-A3IS-01A	3	31.5628
TCGA-E7-A4IJ-01A	2	78.571
TCGA-K4-A6MB-01A	2	61.8448
TCGA-XF-AAMX-01A	3	62.4898
TCGA-FJ-A3Z7-01A	3	49.7241
TCGA-GU-AATP-01A	3	57.7569
TCGA-GV-A6ZA-01A	3	44.8682
TCGA-XF-A9T6-01A	2	29.6061
TCGA-CF-A47X-01A	2	53.9127
TCGA-XF-AAN5-01A	2	34.9874
TCGA-GU-AATO-01A	2	46.0643
TCGA-FD-A43X-01A	4	26.4807
TCGA-YF-AA3L-01A	2	41.7917
TCGA-KQ-A41P-01A	3	56.3427
TCGA-CU-A0YR-01A	2	54.8837
TCGA-XF-A9SP-01A	3	55.6253
TCGA-FD-A3N5-01A	2	54.9838
TCGA-GC-A3WC-01A	3	31.5053
TCGA-XF-A8HG-01A	3	62.6815
TCGA-GV-A3JX-01A	3	77.353
TCGA-UY-A78N-01A	3	52.7018
TCGA-XF-AAMZ-01A	3	40.8252
TCGA-UY-A9PD-01A	3	53.7526
TCGA-4Z-AA7Y-01A	3	27.3207
TCGA-K4-A3WS-01A	3	56.4336
TCGA-FD-A3B6-01A	2	50.2795
TCGA-XF-A9SJ-01A	3	62.3122
TCGA-DK-A1A6-06A	2	49.846
TCGA-CF-A1HR-01A	3	62.8917
TCGA-UY-A78P-01A	2	32.9467
TCGA-BT-A20R-01A	4	56.853
TCGA-FD-A6TE-01A	3	53.4862
TCGA-DK-A2I6-01A	3	54.596
TCGA-E7-A7DU-01A	4	48.257
TCGA-FD-A6TA-01A	2	26.5689
TCGA-BT-A20N-01A	3	90.6051
TCGA-CF-A1HS-01A	3	70.1748
TCGA-K4-A5RI-01A	3	60.7302
TCGA-G2-AA3D-01A	3	63.54
TCGA-G2-A2EF-01A	2	52.5385
TCGA-BT-A20T-01A	3	34.5845
TCGA-DK-AA6W-01A	2	49.0893
TCGA-GD-A6C6-01A	3	49.0523
TCGA-DK-A1A5-01A	2	57.5811
TCGA-KQ-A41S-01A	2	66.6337
TCGA-4Z-AA87-01A	2	59.304
TCGA-ZF-A9RF-01A	2	58.4055
TCGA-BL-A5ZZ-01A	2	39.1946
TCGA-K4-AAQO-01A	2	53.3592
TCGA-ZF-A9R4-01A	2	35.8092
TCGA-DK-AA76-01A	3	49.5652
TCGA-KQ-A41Q-01A	4	61.775
TCGA-4Z-AA7Q-01A	2	50.5391
TCGA-FD-A3SJ-01A	2	56.4488
TCGA-FJ-A3ZF-01A	1	58.186
TCGA-DK-A1AD-01A	2	48.5565
TCGA-G2-AA3C-01A	2	32.909
TCGA-ZF-A9RG-01A	2	54.1064
TCGA-GU-A42P-01A	2	69.7407
TCGA-DK-AA74-01A	2	46.6358
TCGA-DK-A1A7-01A	2	62.4253
TCGA-E7-A677-01A	3	20.8195
TCGA-S5-AA26-01A	5	24.205
TCGA-XF-A9SM-01A	2	44.4172
TCGA-CU-A3YL-01A	2	31.7835
TCGA-GD-A3OQ-01A	3	69.7371
TCGA-GC-A3YS-01A	2	61.2189
TCGA-KQ-A41O-01A	2	45.733
TCGA-2F-A9KR-01A	3	67.3557
TCGA-G2-A2EL-01A	3	21.9644
TCGA-GC-A6I1-01A	1	53.2274
TCGA-E5-A2PC-01A	3	48.1219
TCGA-FD-A3SL-01A	2	40.3163
TCGA-ZF-AA58-01A	2	41.2358
TCGA-CU-A3KJ-01A	3	57.4886
TCGA-XF-A9SZ-01A	2	44.478
TCGA-CU-A5W6-01A	2	41.962
TCGA-BL-A13I-01A	2	36.3522
TCGA-UY-A9PE-01A	2	48.4114
TCGA-DK-A3IK-01A	2	44.9453
TCGA-GC-A3BM-01A	2	37.065
TCGA-R3-A69X-01A	2	40.1853
TCGA-4Z-AA86-01A	2	54.3546
TCGA-BL-A13J-01A	2	49.1235
TCGA-E7-A97P-01A	2	38.0353
TCGA-4Z-AA81-01A	2	49.42
TCGA-5N-A9KM-01A	2	27.7987
TCGA-UY-A78L-01A	2	51.8307
TCGA-C4-A0F6-01A	2	53.2228
TCGA-FD-A6TB-01A	1	32.9526
TCGA-FD-A3SM-01A	2	25.8131
TCGA-GD-A76B-01A	3	52.95
TCGA-BL-A3JM-01A	2	42.6545
TCGA-K4-A3WU-01B	2	39.7253
TCGA-ZF-A9R0-01A	2	55.3061
TCGA-ZF-A9R9-01A	2	54.8562
TCGA-DK-A3IL-01A	2	55.8669
TCGA-UY-A78O-01A	2	50.0592
TCGA-XF-A9SG-01A	2	42.976
TCGA-DK-A1AB-01A	1	30.5624
TCGA-E7-A5KF-01A	4	24.5688
TCGA-ZF-AA54-01A	1	46.2995
TCGA-BT-A2LA-01A	3	57.9889
TCGA-BT-A20O-01A	2	38.4896
TCGA-DK-A6B2-01A	2	64.6135
TCGA-DK-AA6P-01A	3	74.7285
TCGA-C4-A0EZ-01A	4	52.0897
TCGA-E7-A5KE-01A	2	43.1082
TCGA-GC-A3I6-01A	2	37.5367
TCGA-XF-AAMQ-01A	2	41.2113
TCGA-GU-A766-01A	2	48.5607
TCGA-G2-A2EC-01A	1	32.104
TCGA-ZF-A9RN-01A	2	43.0072
TCGA-FD-A3NA-01A	1	48.7393
TCGA-FD-A43N-01A	2	71.7146
TCGA-DK-A3IQ-01A	2	44.5524
TCGA-GU-A42Q-01A	2	47.9744
TCGA-ZF-AA53-01A	3	58.1318
TCGA-BT-A42F-01A	2	34.2899
TCGA-FD-A62O-01A	2	38.785
TCGA-FD-A3B3-01A	2	43.0988
TCGA-BT-A42E-01A	2	51.9667
TCGA-UY-A9PA-01A	2	47.9076
TCGA-4Z-AA7O-01A	2	25.075
TCGA-ZF-A9RD-01A	1	52.0595
TCGA-GV-A3QH-01A	2	42.8678
TCGA-E7-A3Y1-01A	3	40.6477
TCGA-C4-A0F1-01A	2	20.6024
TCGA-5N-A9KI-01A	2	40.9224
TCGA-GC-A3RB-01A	2	57.8319
TCGA-ZF-AA4N-01A	1	44.0147
TCGA-FD-A6TH-01A	2	63.1626
TCGA-GV-A40G-01A	2	56.0985
TCGA-CU-A0YN-01A	1	51.7618
TCGA-FT-A61P-01A	2	46.9177
TCGA-GU-AATQ-01A	3	49.4628
TCGA-XF-A8HF-01A	2	74.0227
TCGA-UY-A78M-01A	3	61.1247
TCGA-GV-A40E-01A	3	48.9531
TCGA-FD-A3B5-01A	2	68.1692
TCGA-PQ-A6FI-01A	3	64.8196
TCGA-HQ-A2OE-01A	2	57.5974
TCGA-K4-A4AC-01A	3	55.5975
TCGA-YF-AA3M-01A	2	66.8978
TCGA-XF-A9SK-01A	2	46.2222
TCGA-CF-A27C-01A	3	16.6729
TCGA-CF-A9FF-01A	3	33.299
TCGA-FD-A5C1-01A	2	62.2843
TCGA-G2-AA3F-01A	2	54.4262
TCGA-ZF-A9R2-01A	3	59.365
TCGA-2F-A9KP-01A	2	47.5044
TCGA-FD-A3SR-01A	2	45.2003
TCGA-XF-AAN7-01A	2	56.9309
TCGA-GU-A42R-01A	2	27.7987
TCGA-XF-AAN3-01A	2	38.4061
TCGA-FD-A6TF-01A	2	53.9748
TCGA-GV-A3QF-01A	1	51.1298
TCGA-4Z-AA89-01A	3	76.8159
TCGA-DK-A6B1-01A	2	48.8971
TCGA-GV-A3QK-01B	1	29.652
TCGA-CF-A3MG-01A	2	60.7545
TCGA-DK-A3X2-01A	5	62.9531
TCGA-LC-A66R-01A	2	58.5437
TCGA-FD-A6TD-01A	2	53.1533
TCGA-E7-A6ME-01A	2	37.065
TCGA-FT-A3EE-01A	2	53.3338
TCGA-GC-A3OO-01A	3	58.8922
TCGA-GU-A764-01A	2	52.8579
TCGA-K4-A3WV-01A	2	66.717
TCGA-DK-A6B5-01A	3	37.9775
TCGA-FD-A6TI-01A	2	35.867
TCGA-XF-A8HC-01A	2	44.4316
TCGA-E7-A8O8-01A	3	53.3495
TCGA-FD-A3N6-01A	3	29.9441
TCGA-FD-A6TK-01A	2	59.304
TCGA-YC-A9TC-01A	2	22.2947
TCGA-DK-A1AG-01A	3	19.6562
TCGA-DK-AA6X-01A	1	29.6853
TCGA-BL-A0C8-01A	2	67.3909
TCGA-DK-AA6Q-01A	1	40.189
TCGA-E7-A3X6-01A	2	27.6801
TCGA-FD-A5BT-01A	2	45.2317
TCGA-FD-A5BV-01A	2	69.4058
TCGA-FD-A5BZ-01A	2	57.8144
TCGA-FD-A5C0-01A	2	47.3397
TCGA-DK-A1AE-01A	2	18.4323
TCGA-GU-A762-01A	1	37.065
TCGA-GV-A3JV-01A	2	54.5861
TCGA-XF-AAMY-01A	2	47.4432
TCGA-FD-A3SP-01A	2	51.4454
TCGA-ZF-AA52-01A	2	48.4838
TCGA-DK-A1AF-01A	2	35.4133
TCGA-DK-A6AV-01A	1	45.1106
TCGA-ZF-AA56-01A	1	50.6478
TCGA-XF-A9SX-01A	1	37.5715
TCGA-ZF-A9R5-01A	2	19.3263
TCGA-BT-A20V-01A	2	57.5552
TCGA-HQ-A2OF-01A	2	57.8782
TCGA-XF-AAMT-01A	1	45.0628
TCGA-YC-A8S6-01A	2	31.0117
TCGA-4Z-AA82-01A	2	53.8129
TCGA-BT-A2LD-01A	2	51.3998
TCGA-DK-A2HX-01A	3	60.0597
TCGA-2F-A9KW-01A	1	31.1499
TCGA-CU-A0YO-01A	2	45.4046
TCGA-BT-A20Q-01A	2	31.1601
TCGA-CU-A72E-01A	2	34.8837
TCGA-XF-AAMR-01A	2	29.1099
TCGA-GV-A3QG-01A	1	37.9386
TCGA-ZF-AA4T-01A	2	69.8283
TCGA-C4-A0F0-01A	1	52.5225
TCGA-UY-A8OD-01A	3	63.5574
TCGA-BT-A20P-01A	3	26.4576
TCGA-CF-A8HY-01A	3	56.5823
TCGA-CU-A3QU-01A	2	37.8164
TCGA-FD-A5BR-01A	2	62.7746
TCGA-UY-A8OC-01A	1	49.955
TCGA-GD-A3OS-01A	3	58.3681
TCGA-K4-A4AB-01B	2	34.689
TCGA-XF-A9SL-01A	2	31.869
TCGA-BT-A20W-01A	2	41.8704
TCGA-XF-A8HH-01A	1	43.128
TCGA-ZF-A9R1-01A	1	31.1209
TCGA-BT-A20U-01A	1	34.1527
TCGA-DK-AA6T-01A	2	30.6322
TCGA-G2-A3IB-01A	2	25.6965
TCGA-FD-A62N-01A	2	34.7109
TCGA-ZF-A9RM-01A	2	89.3469
TCGA-ZF-A9R3-01A	2	47.3394
TCGA-XF-A9T2-01A	2	24.357
TCGA-DK-A1AA-01A	2	20.4716
TCGA-HQ-A5ND-01A	2	45.9514
TCGA-PQ-A6FN-01A	1	35.3492
TCGA-DK-A3IM-01A	3	87.3979
TCGA-DK-A3IV-01A	2	53.0549
TCGA-4Z-AA83-01A	2	31.2264
TCGA-E7-A7PW-01A	4	73.6623
TCGA-GC-A3RD-01A	2	49.42
TCGA-FD-A3B4-01A	2	30.9419
TCGA-GV-A3JW-01A	3	60.6248
TCGA-FD-A62S-01A	2	43.8411
TCGA-XF-A8HB-01A	5	20.7338
TCGA-XF-AAMF-01A	1	31.9277
TCGA-BT-A20X-01A	1	52.228
TCGA-XF-AAN1-01A	1	23.4458
TCGA-FD-A5BU-01A	2	37.0529
TCGA-E7-A519-01A	2	25.7903
TCGA-FD-A3SQ-01A	2	36.3657
TCGA-LT-A8JT-01A	1	29.8963
TCGA-CF-A5UA-01A	1	31.6815
TCGA-FD-A3B7-01A	2	61.8816
TCGA-FJ-A3Z9-01A	3	20.7691
TCGA-CF-A47V-01A	2	20.2882
TCGA-C4-A0F7-01A	2	50.5967
TCGA-E7-A97Q-01A	1	57.2642
TCGA-G2-A2EK-01A	2	41.3734
TCGA-XF-A8HI-01A	3	22.5026
TCGA-CF-A3MI-01A	2	67.776
TCGA-ZF-A9RE-01A	2	73.5638
TCGA-ZF-AA4R-01A	1	67.8575
TCGA-2F-A9KQ-01A	3	22.7747
TCGA-DK-AA6M-01A	2	38.0696
TCGA-FD-A43U-01A	1	44.8606
TCGA-XF-A9SV-01A	2	54.4355
TCGA-CF-A47Y-01A	3	29.0571
TCGA-4Z-AA7S-01A	2	24.71
TCGA-GU-A763-01A	3	22.7318
TCGA-CF-A9FL-01A	2	30.2296
TCGA-FD-A43Y-01A	2	50.0416
TCGA-XF-A9SU-01A	1	53.8375
TCGA-XF-AAMH-01A	2	24.1214
TCGA-ZF-AA5H-01A	2	52.3271
TCGA-BT-A42B-01A	3	27.9163
TCGA-ZF-AA4U-01A	1	52.8579
TCGA-CF-A8HX-01A	1	31.3906
TCGA-ZF-AA5P-01A	2	51.8017
TCGA-ZF-AA5N-01A	2	28.8283
TCGA-E7-A678-01A	2	22.3184
TCGA-CF-A5U8-01A	3	29.6224
TCGA-SY-A9G0-01A	2	47.1736
TCGA-XF-A9SW-01A	1	28.488
TCGA-FD-A5BY-01A	2	36.4934
TCGA-FJ-A871-01A	2	12.8608
TCGA-CF-A3MH-01A	3	56.9404
TCGA-XF-AAN4-01A	1	32.3256
TCGA-XF-AAMJ-01A	2	49.4528
TCGA-E7-A6MF-01A	4	29.0654
TCGA-CF-A9FH-01A	4	24.8792
TCGA-E7-A4XJ-01A	1	27.4938
TCGA-FD-A3B8-01A	2	52.4172
TCGA-XF-A9SH-01A	1	47.9381
TCGA-BT-A0S7-01A	1	49.0778
TCGA-CF-A7I0-01A	1	16.2144
TCGA-XF-A9T4-01A	4	22.8738
TCGA-DK-A3WX-01A	1	38.0648
TCGA-CF-A47T-01A	2	46.5129
TCGA-CF-A47S-01A	2	67.3743
TCGA-CF-A47W-01A	3	18.975
TCGA-E7-A8O7-01A	1	34.1608
TCGA-DK-A6B0-01A	2	16.4724
TCGA-XF-AAMW-01A	1	28.6374
TCGA-CF-A3MF-01A	2	80.1497
TCGA-FD-A5BS-01A	2	26.1645
TCGA-XF-AAME-01A	2	32.4928
TCGA-CF-A9FM-01A	1	24.0316
TCGA-DK-A3WY-01A	1	46.609
TCGA-4Z-AA7N-01A	2	23.3226
