# Supplementary material for: Development and validation of an intra-tumor heterogeneity-related signature to predict prognosis of bladder cancer: a study based on single-cell RNA-seq
Source: Aging (Albany NY). 2021 Aug 2;13(15):19415–41. doi: 10.18632/aging.203353 (PMC8386527; doi:10.18632/aging.203353)
Supplement: Supplementary Table 2 [file aging-13-203353-s003.xls]

## Sheet: tsneCluster
Supplementary Table 2. 2075 cell samples were classified into 14 clusters.
cell_ID	cluster
Primary_human_AAACCTGAGCAGGTCA	5
Primary_human_AAACCTGGTCTCCCTA	6
Primary_human_AAACCTGTCAAGATCC	7
Primary_human_AAACCTGTCAGGTTCA	2
Primary_human_AAACCTGTCCAGTATG	3
Primary_human_AAACGGGAGCTAGTGG	4
Primary_human_AAACGGGCAAACGTGG	5
Primary_human_AAACGGGCAATGAAAC	1
Primary_human_AAACGGGCAGCAGTTT	6
Primary_human_AAACGGGGTCCTCCAT	4
Primary_human_AAAGATGGTATGGTTC	1
Primary_human_AAAGATGGTTGAGTTC	0
Primary_human_AAAGATGGTTGGAGGT	11
Primary_human_AAAGATGTCATATCGG	7
Primary_human_AAAGATGTCATCGATG	0
Primary_human_AAAGCAAAGCCCAACC	7
Primary_human_AAAGCAAAGGAATTAC	3
Primary_human_AAAGCAATCGACCAGC	10
Primary_human_AAAGCAATCTGATTCT	0
Primary_human_AAAGTAGAGCTCCTTC	1
Primary_human_AAAGTAGAGTCTCGGC	4
Primary_human_AAAGTAGCAAATACAG	1
Primary_human_AAAGTAGCACTTCTGC	2
Primary_human_AAAGTAGCAGGTCGTC	9
Primary_human_AAAGTAGTCAGGTAAA	1
Primary_human_AAATGCCCAGAGTGTG	2
Primary_human_AAATGCCGTACGCTGC	2
Primary_human_AAATGCCGTAGGGACT	3
Primary_human_AAATGCCGTTCCAACA	6
Primary_human_AAATGCCTCAACGCTA	1
Primary_human_AAATGCCTCGCCTGAG	5
Primary_human_AACACGTGTCGGCACT	13
Primary_human_AACACGTGTGTTAAGA	2
Primary_human_AACACGTTCCATGAGT	1
Primary_human_AACCATGCAAGCGATG	2
Primary_human_AACCATGCACACCGAC	8
Primary_human_AACCATGGTATAAACG	5
Primary_human_AACCATGTCTGCGACG	3
Primary_human_AACCGCGAGCGTGTCC	0
Primary_human_AACCGCGTCCTAGTGA	1
Primary_human_AACCGCGTCGAATGCT	0
Primary_human_AACCGCGTCGTAGATC	7
Primary_human_AACCGCGTCTACTATC	1
Primary_human_AACGTTGAGAGGACGG	4
Primary_human_AACGTTGCACTGCCAG	2
Primary_human_AACTCAGAGGTGTTAA	5
Primary_human_AACTCAGGTACAGTTC	11
Primary_human_AACTCAGGTTAGGGTG	1
Primary_human_AACTCAGTCCGCATCT	4
Primary_human_AACTCCCCACCCTATC	1
Primary_human_AACTCCCTCGCACTCT	6
Primary_human_AACTCTTAGCCAGAAC	3
Primary_human_AACTCTTAGCGTTGCC	2
Primary_human_AACTCTTAGGAGTACC	3
Primary_human_AACTCTTCAATGTAAG	6
Primary_human_AACTCTTCACCAGGTC	1
Primary_human_AACTCTTGTTCATGGT	2
Primary_human_AACTCTTTCGAACGGA	1
Primary_human_AACTCTTTCGGTCCGA	2
Primary_human_AACTGGTCACGAAAGC	1
Primary_human_AACTGGTCATGCTAGT	1
Primary_human_AACTGGTTCTTAACCT	12
Primary_human_AACTTTCAGTGGCACA	5
Primary_human_AACTTTCCAACTTGAC	3
Primary_human_AACTTTCCATTGGTAC	5
Primary_human_AACTTTCGTACTCTCC	4
Primary_human_AAGACCTGTAATCGTC	1
Primary_human_AAGCCGCAGTTAGCGG	0
Primary_human_AAGCCGCCAATCACAC	4
Primary_human_AAGCCGCGTAACGACG	10
Primary_human_AAGCCGCGTTACGCGC	6
Primary_human_AAGCCGCGTTCTCATT	7
Primary_human_AAGCCGCTCAAGATCC	2
Primary_human_AAGGAGCAGAAGGGTA	2
Primary_human_AAGGAGCGTTCACGGC	1
Primary_human_AAGGAGCTCTTACCGC	9
Primary_human_AAGGCAGAGACGACGT	9
Primary_human_AAGGCAGAGCTAAGAT	5
Primary_human_AAGGCAGAGGAATTAC	8
Primary_human_AAGGCAGCACACTGCG	6
Primary_human_AAGGCAGGTTATGTGC	7
Primary_human_AAGGTTCGTGAAATCA	1
Primary_human_AAGTCTGAGAACAATC	8
Primary_human_AAGTCTGAGTAGATGT	0
Primary_human_AAGTCTGCAGGTCTCG	3
Primary_human_AAGTCTGGTTAAGACA	4
Primary_human_AAGTCTGTCTTCGGTC	5
Primary_human_AAGTCTGTCTTGAGGT	2
Primary_human_AATCCAGAGAATAGGG	5
Primary_human_AATCCAGAGAGCCCAA	6
Primary_human_AATCCAGAGATCCGAG	6
Primary_human_AATCCAGAGTATCGAA	0
Primary_human_AATCCAGCAACGATCT	7
Primary_human_AATCCAGTCGCTGATA	4
Primary_human_AATCCAGTCTGCGACG	0
Primary_human_AATCGGTCATGTTCCC	7
Primary_human_AATCGGTGTACCGTAT	3
Primary_human_AATCGGTGTAGCCTAT	0
Primary_human_AATCGGTGTCTCATCC	2
Primary_human_ACACCAAAGAGTAATC	2
Primary_human_ACACCAAAGGTTACCT	3
Primary_human_ACACCAACAGTAAGAT	6
Primary_human_ACACCAATCTGTTTGT	3
Primary_human_ACACCCTCAGACACTT	2
Primary_human_ACACCCTCAGATTGCT	2
Primary_human_ACACCCTGTTACGACT	2
Primary_human_ACACCCTTCTCTTATG	3
Primary_human_ACACCGGAGAGCCTAG	2
Primary_human_ACACCGGAGAGGTAGA	9
Primary_human_ACACCGGCAACTGCTA	1
Primary_human_ACACCGGCAGCTGTAT	8
Primary_human_ACACCGGCAGTAAGAT	2
Primary_human_ACACCGGGTAGAGGAA	2
Primary_human_ACACCGGGTTATTCTC	4
Primary_human_ACACTGAAGCATCATC	7
Primary_human_ACACTGACAGTTCCCT	8
Primary_human_ACACTGAGTGAGGGTT	2
Primary_human_ACACTGATCAGTTCGA	12
Primary_human_ACAGCCGAGAAACCTA	4
Primary_human_ACAGCCGAGCGTAGTG	1
Primary_human_ACAGCCGCAAACTGCT	6
Primary_human_ACAGCCGCAGCTGCTG	2
Primary_human_ACAGCCGTCCAGATCA	0
Primary_human_ACAGCCGTCCTTTCTC	2
Primary_human_ACAGCTAAGATAGTCA	4
Primary_human_ACAGCTAAGCCACGCT	0
Primary_human_ACAGCTACATAGTAAG	10
Primary_human_ACAGCTAGTATAGTAG	3
Primary_human_ACAGCTAGTTAAAGTG	10
Primary_human_ACAGCTATCGCTAGCG	4
Primary_human_ACATACGAGTCGCCGT	9
Primary_human_ACATACGGTGTTTGTG	6
Primary_human_ACATCAGAGAGACGAA	0
Primary_human_ACATCAGAGAGCCCAA	10
Primary_human_ACATCAGGTACAGTTC	0
Primary_human_ACATCAGGTACTTGAC	1
Primary_human_ACATCAGGTTATTCTC	7
Primary_human_ACATCAGTCCGGGTGT	0
Primary_human_ACATGGTAGATCCGAG	1
Primary_human_ACATGGTCACTCGACG	0
Primary_human_ACATGGTGTCATATGC	2
Primary_human_ACATGGTTCATGGTCA	0
Primary_human_ACATGGTTCGCGGATC	1
Primary_human_ACCAGTAAGGGAACGG	2
Primary_human_ACCAGTACAGGCTGAA	0
Primary_human_ACCAGTAGTGTGAAAT	6
Primary_human_ACCAGTATCTGGCGTG	2
Primary_human_ACCCACTAGCCATCGC	8
Primary_human_ACCCACTAGGTGTGGT	0
Primary_human_ACCCACTCACATTAGC	6
Primary_human_ACCCACTCACGGTGTC	5
Primary_human_ACCCACTCAGCCTTGG	0
Primary_human_ACCCACTGTACCATCA	3
Primary_human_ACCCACTGTCCGAATT	0
Primary_human_ACCCACTTCACAGGCC	11
Primary_human_ACCCACTTCATAGCAC	4
Primary_human_ACCCACTTCCGGGTGT	1
Primary_human_ACCCACTTCGTCCAGG	5
Primary_human_ACCGTAACACGAGGTA	4
Primary_human_ACCGTAAGTGGCCCTA	1
Primary_human_ACCGTAATCGAATCCA	6
Primary_human_ACCGTAATCGATCCCT	4
Primary_human_ACCTTTAAGAGCTGCA	5
Primary_human_ACCTTTAAGTCGATAA	8
Primary_human_ACCTTTACATCCTTGC	2
Primary_human_ACCTTTAGTCGCTTTC	10
Primary_human_ACGAGCCCAGTTTACG	1
Primary_human_ACGAGCCGTCTGGTCG	10
Primary_human_ACGAGGAAGAATGTTG	4
Primary_human_ACGAGGACAATAGAGT	1
Primary_human_ACGAGGACAATGACCT	4
Primary_human_ACGAGGACATACGCTA	1
Primary_human_ACGAGGACATACTCTT	0
Primary_human_ACGAGGAGTGCAGACA	2
Primary_human_ACGAGGAGTTAAAGAC	4
Primary_human_ACGAGGATCATGTAGC	8
Primary_human_ACGAGGATCCATGAAC	7
Primary_human_ACGATACCACAGACAG	5
Primary_human_ACGATACCATCGGACC	4
Primary_human_ACGATACGTACCAGTT	1
Primary_human_ACGATACGTCTAAACC	0
Primary_human_ACGATACGTTCAACCA	6
Primary_human_ACGATACTCCCAAGTA	0
Primary_human_ACGATGTAGAAACGCC	4
Primary_human_ACGATGTAGACTTGAA	7
Primary_human_ACGATGTTCACTTATC	1
Primary_human_ACGATGTTCCCAAGAT	1
Primary_human_ACGCAGCAGTGTCTCA	1
Primary_human_ACGCAGCTCTGACCTC	8
Primary_human_ACGCCAGAGAGGTAGA	5
Primary_human_ACGCCAGAGAGTACCG	2
Primary_human_ACGCCAGAGCAGATCG	2
Primary_human_ACGCCAGAGCTGATAA	2
Primary_human_ACGCCAGAGTAGCGGT	1
Primary_human_ACGCCAGCAGATAATG	5
Primary_human_ACGCCAGGTAGTAGTA	4
Primary_human_ACGCCAGTCAAGATCC	7
Primary_human_ACGCCAGTCCTTGCCA	3
Primary_human_ACGCCGAAGCCGCCTA	2
Primary_human_ACGCCGACATCACGAT	8
Primary_human_ACGCCGAGTACCTACA	2
Primary_human_ACGCCGAGTCTTGCGG	2
Primary_human_ACGGAGAAGTATCTCG	4
Primary_human_ACGGCCAAGCAAATCA	12
Primary_human_ACGGCCAAGGCTATCT	2
Primary_human_ACGGCCACATTCCTCG	10
Primary_human_ACGGCCAGTTCAACCA	13
Primary_human_ACGGCCAGTTCTGAAC	3
Primary_human_ACGGCCATCGGCGCTA	2
Primary_human_ACGGGCTAGAGCTGCA	2
Primary_human_ACGGGCTAGCTGGAAC	1
Primary_human_ACGGGCTAGTTATCGC	5
Primary_human_ACGGGCTTCCGCGGTA	3
Primary_human_ACGGGCTTCGTATCAG	5
Primary_human_ACGGGCTTCTATCCTA	12
Primary_human_ACGGGTCAGGTGATTA	3
Primary_human_ACGGGTCGTATCGCAT	0
Primary_human_ACGGGTCGTATGAATG	3
Primary_human_ACGGGTCGTCATATGC	1
Primary_human_ACGTCAAAGGGATCTG	2
Primary_human_ACGTCAACAGTCGTGC	1
Primary_human_ACGTCAAGTACCTACA	1
Primary_human_ACGTCAAGTAGCGCAA	10
Primary_human_ACTATCTTCATCGATG	0
Primary_human_ACTATCTTCCCACTTG	8
Primary_human_ACTATCTTCCCGACTT	0
Primary_human_ACTATCTTCGAATGGG	0
Primary_human_ACTGAACAGTATCTCG	5
Primary_human_ACTGAACCACTTGGAT	13
Primary_human_ACTGAACCAGCTGCTG	5
Primary_human_ACTGAACGTAGCTCCG	7
Primary_human_ACTGAACGTAGCTGCC	4
Primary_human_ACTGAACTCCTGCAGG	1
Primary_human_ACTGAGTAGGTGATAT	0
Primary_human_ACTGAGTCAGTCTTCC	1
Primary_human_ACTGAGTCATGCATGT	1
Primary_human_ACTGAGTTCAGGCCCA	0
Primary_human_ACTGAGTTCGCTTAGA	5
Primary_human_ACTGAGTTCGTCACGG	2
Primary_human_ACTGATGAGGTGATAT	4
Primary_human_ACTGCTCAGCCAGAAC	2
Primary_human_ACTGCTCAGTGTTTGC	4
Primary_human_ACTGCTCCACGGTAGA	10
Primary_human_ACTGCTCCATCACCCT	4
Primary_human_ACTGCTCTCGCCAAAT	0
Primary_human_ACTGTCCAGAGTCTGG	6
Primary_human_ACTGTCCAGGTGTTAA	4
Primary_human_ACTGTCCCACTTAACG	7
Primary_human_ACTGTCCCAGATAATG	0
Primary_human_ACTGTCCCAGCTATTG	3
Primary_human_ACTGTCCGTAAACACA	4
Primary_human_ACTGTCCGTAGGCTGA	4
Primary_human_ACTGTCCGTCTAGCGC	0
Primary_human_ACTGTCCGTTTGGCGC	3
Primary_human_ACTTACTCAATGCCAT	1
Primary_human_ACTTACTCACCGGAAA	2
Primary_human_ACTTACTCAGGTCTCG	5
Primary_human_ACTTACTCATGATCCA	4
Primary_human_ACTTACTGTAGGCTGA	2
Primary_human_ACTTACTGTCCAACTA	7
Primary_human_ACTTACTGTCCGACGT	3
Primary_human_ACTTACTTCAGCTTAG	6
Primary_human_ACTTACTTCTTGACGA	1
Primary_human_ACTTGTTAGTTGCAGG	6
Primary_human_ACTTGTTAGTTTGCGT	0
Primary_human_ACTTGTTCATGCCACG	3
Primary_human_ACTTGTTGTGCGAAAC	1
Primary_human_ACTTTCAAGCAAATCA	1
Primary_human_ACTTTCACACGGTGTC	3
Primary_human_ACTTTCAGTCTCCATC	7
Primary_human_AGAATAGCACAGCGTC	13
Primary_human_AGAATAGCACATTAGC	6
Primary_human_AGAATAGCAGTCGTGC	7
Primary_human_AGAATAGTCAGCACAT	5
Primary_human_AGACGTTCACGCCAGT	1
Primary_human_AGACGTTTCGCTTAGA	7
Primary_human_AGAGCGAAGTGGGCTA	3
Primary_human_AGAGCGACAGACGTAG	5
Primary_human_AGAGCGACAGCTGTAT	11
Primary_human_AGAGCGACATATGGTC	0
Primary_human_AGAGCGAGTCAGAATA	11
Primary_human_AGAGCGATCAACACAC	4
Primary_human_AGAGCGATCAGGATCT	2
Primary_human_AGAGCTTCATTACGAC	9
Primary_human_AGAGCTTGTGATGCCC	1
Primary_human_AGAGCTTTCACCCTCA	2
Primary_human_AGAGTGGAGTTGAGAT	0
Primary_human_AGAGTGGCAGCTGTGC	1
Primary_human_AGAGTGGGTCAGAAGC	4
Primary_human_AGAGTGGGTCTAAAGA	0
Primary_human_AGATCTGTCTATCCTA	0
Primary_human_AGATTGCAGCACCGTC	1
Primary_human_AGATTGCGTAAGTAGT	3
Primary_human_AGATTGCTCCTGTAGA	4
Primary_human_AGATTGCTCTGCGGCA	3
Primary_human_AGCATACAGCTAACTC	0
Primary_human_AGCATACAGGTGGGTT	13
Primary_human_AGCATACCACGAAATA	3
Primary_human_AGCATACGTACGCTGC	6
Primary_human_AGCATACGTGGACGAT	1
Primary_human_AGCATACGTTCCACTC	10
Primary_human_AGCATACTCACCCTCA	9
Primary_human_AGCCTAACAATCCAAC	8
Primary_human_AGCCTAACACCCATTC	3
Primary_human_AGCGGTCCATTTGCTT	2
Primary_human_AGCGGTCGTGTTGAGG	4
Primary_human_AGCGGTCTCAGTGCAT	4
Primary_human_AGCGGTCTCTGAGTGT	4
Primary_human_AGCGGTCTCTTGACGA	2
Primary_human_AGCGTATAGCTATGCT	7
Primary_human_AGCGTATCAAACGTGG	0
Primary_human_AGCGTATTCTCTAGGA	8
Primary_human_AGCGTCGAGAACAATC	2
Primary_human_AGCGTCGAGAAGGTTT	6
Primary_human_AGCGTCGAGAGTAATC	1
Primary_human_AGCGTCGAGCGGCTTC	1
Primary_human_AGCGTCGAGGTGTTAA	7
Primary_human_AGCGTCGCAATACGCT	1
Primary_human_AGCGTCGCAGATGAGC	0
Primary_human_AGCTCCTAGTGTTTGC	5
Primary_human_AGCTCCTCACGAGGTA	7
Primary_human_AGCTCCTCAGAGTGTG	10
Primary_human_AGCTCCTGTCCATGAT	11
Primary_human_AGCTCCTGTCTGCCAG	7
Primary_human_AGCTCCTTCACATGCA	6
Primary_human_AGCTCCTTCAGGTTCA	1
Primary_human_AGCTCTCAGAGTCTGG	4
Primary_human_AGCTCTCAGGATATAC	0
Primary_human_AGCTCTCAGTGGACGT	1
Primary_human_AGCTCTCAGTGGTCCC	3
Primary_human_AGCTCTCTCTCGAGTA	3
Primary_human_AGCTCTCTCTTGTCAT	2
Primary_human_AGCTTGACACGGATAG	7
Primary_human_AGCTTGAGTCTCTTAT	4
Primary_human_AGCTTGATCGTGTAGT	3
Primary_human_AGCTTGATCTAAGCCA	10
Primary_human_AGGCCACCATGACATC	1
Primary_human_AGGCCACGTAAGGGCT	5
Primary_human_AGGCCACGTAGGGACT	2
Primary_human_AGGCCACTCACCCTCA	12
Primary_human_AGGCCACTCGCATGGC	13
Primary_human_AGGCCGTAGAATGTTG	5
Primary_human_AGGCCGTAGGATGGTC	7
Primary_human_AGGCCGTTCTCTGCTG	5
Primary_human_AGGGATGAGACTGTAA	5
Primary_human_AGGGATGAGAGTTGGC	3
Primary_human_AGGGATGAGCAGGCTA	3
Primary_human_AGGGATGAGGTGCAAC	3
Primary_human_AGGGTGAGTTTAGCTG	5
Primary_human_AGGGTGATCTCGCATC	8
Primary_human_AGGTCATAGATATACG	5
Primary_human_AGGTCATCAGGTCTCG	0
Primary_human_AGGTCATGTCTTGCGG	0
Primary_human_AGGTCATTCCTTTCTC	0
Primary_human_AGGTCCGAGAGTACAT	6
Primary_human_AGGTCCGAGCTACCTA	2
Primary_human_AGGTCCGCAGCTGCAC	4
Primary_human_AGGTCCGGTCGCATAT	3
Primary_human_AGGTCCGTCATAAAGG	0
Primary_human_AGTAGTCCATTCTCAT	3
Primary_human_AGTAGTCTCGTGGGAA	2
Primary_human_AGTCTTTCAGTTTACG	8
Primary_human_AGTCTTTCATTGTGCA	2
Primary_human_AGTCTTTGTGTGAAAT	6
Primary_human_AGTGAGGAGCCACGCT	1
Primary_human_AGTGAGGAGCCCAATT	1
Primary_human_AGTGAGGCAGACAGGT	7
Primary_human_AGTGAGGCATTGGCGC	0
Primary_human_AGTGAGGGTACCGAGA	12
Primary_human_AGTGAGGGTATGGTTC	7
Primary_human_AGTGAGGGTCGTCTTC	4
Primary_human_AGTGAGGGTTTGCATG	2
Primary_human_AGTGAGGTCACATGCA	9
Primary_human_AGTGAGGTCTCTAGGA	0
Primary_human_AGTGGGACATGACATC	5
Primary_human_AGTGGGACATTCCTCG	0
Primary_human_AGTGGGAGTAGGAGTC	8
Primary_human_AGTGTCAAGCAAATCA	8
Primary_human_AGTGTCACAGACACTT	6
Primary_human_AGTGTCAGTTGGACCC	2
Primary_human_AGTGTCATCTGCCAGG	6
Primary_human_AGTTGGTGTCAGCTAT	1
Primary_human_AGTTGGTTCGGCGGTT	1
Primary_human_ATAACGCAGGCGACAT	3
Primary_human_ATAACGCCAGCGATCC	12
Primary_human_ATAACGCCATTAACCG	6
Primary_human_ATAAGAGAGGATGCGT	5
Primary_human_ATAGACCAGCTATGCT	8
Primary_human_ATAGACCAGCTCAACT	2
Primary_human_ATAGACCAGGGCACTA	1
Primary_human_ATAGACCAGTATGACA	0
Primary_human_ATAGACCAGTGTCCAT	12
Primary_human_ATAGACCCATAAAGGT	2
Primary_human_ATAGACCCATACAGCT	5
Primary_human_ATAGACCGTAGCCTCG	5
Primary_human_ATAGACCTCACCACCT	7
Primary_human_ATAGACCTCCGGCACA	5
Primary_human_ATAGACCTCTGCTGCT	1
Primary_human_ATCACGAAGAACAATC	2
Primary_human_ATCACGAAGCCGATTT	4
Primary_human_ATCACGAAGGAGCGTT	0
Primary_human_ATCACGACAAGTCTGT	2
Primary_human_ATCACGACAGATGGGT	2
Primary_human_ATCACGATCGGTGTCG	0
Primary_human_ATCATCTAGAGGTACC	0
Primary_human_ATCATCTAGCCACGTC	1
Primary_human_ATCATCTAGCTGAAAT	12
Primary_human_ATCATCTAGCTGGAAC	2
Primary_human_ATCATCTAGGGCACTA	7
Primary_human_ATCATCTGTCTACCTC	0
Primary_human_ATCATCTGTCTCCCTA	1
Primary_human_ATCATCTTCCGAAGAG	1
Primary_human_ATCATGGCAAGGTGTG	12
Primary_human_ATCATGGCAGGCTGAA	13
Primary_human_ATCATGGCAGTCAGAG	2
Primary_human_ATCATGGGTAGCGTCC	5
Primary_human_ATCATGGGTGAGCGAT	1
Primary_human_ATCATGGTCACCTCGT	8
Primary_human_ATCATGGTCAGCACAT	5
Primary_human_ATCCACCTCCGCAAGC	0
Primary_human_ATCCGAAAGTGCGATG	4
Primary_human_ATCCGAAGTAGAGCTG	3
Primary_human_ATCCGAATCATCGGAT	0
Primary_human_ATCGAGTAGAGTCTGG	2
Primary_human_ATCGAGTCATAAGACA	7
Primary_human_ATCGAGTCATTCGACA	5
Primary_human_ATCGAGTGTCTCCACT	8
Primary_human_ATCGAGTTCTCATTCA	12
Primary_human_ATCTACTAGATAGGAG	3
Primary_human_ATCTACTAGGTGATAT	6
Primary_human_ATCTACTAGTGTTTGC	0
Primary_human_ATCTACTGTTAAGTAG	7
Primary_human_ATCTACTTCAGGTTCA	3
Primary_human_ATCTACTTCTAACTTC	0
Primary_human_ATCTGCCCAACACGCC	4
Primary_human_ATCTGCCGTGTGACCC	4
Primary_human_ATCTGCCTCATCGCTC	1
Primary_human_ATCTGCCTCTTAACCT	0
Primary_human_ATGAGGGAGAGCTTCT	3
Primary_human_ATGAGGGAGTGGTAGC	10
Primary_human_ATGAGGGCAGCCAGAA	3
Primary_human_ATGAGGGCAGCTTCGG	8
Primary_human_ATGAGGGGTAAGGGCT	6
Primary_human_ATGAGGGTCAAACCAC	7
Primary_human_ATGCGATAGGATGGAA	2
Primary_human_ATGCGATCAAGGCTCC	0
Primary_human_ATGCGATTCGACCAGC	0
Primary_human_ATGCGATTCGTTTATC	5
Primary_human_ATGCGATTCTACTATC	2
Primary_human_ATGGGAGAGAGAGCTC	2
Primary_human_ATGGGAGCAGACAAGC	8
Primary_human_ATGGGAGGTGCATCTA	3
Primary_human_ATGGGAGTCTGCCAGG	0
Primary_human_ATGTGTGAGCCGGTAA	10
Primary_human_ATGTGTGGTGGCAAAC	0
Primary_human_ATGTGTGGTTCAGTAC	4
Primary_human_ATTACTCAGAGCTTCT	2
Primary_human_ATTACTCCACTTAACG	1
Primary_human_ATTACTCGTGTTCGAT	1
Primary_human_ATTACTCTCGTAGGTT	12
Primary_human_ATTATCCAGTACTTGC	3
Primary_human_ATTATCCCAAGTTAAG	9
Primary_human_ATTATCCGTCATCCCT	5
Primary_human_ATTATCCTCCGGCACA	3
Primary_human_ATTATCCTCCTTGACC	2
Primary_human_ATTCTACAGGTTCCTA	2
Primary_human_ATTCTACCACTGAAGG	7
Primary_human_ATTCTACCAGATCGGA	0
Primary_human_ATTCTACCAGTTAACC	7
Primary_human_ATTCTACGTCAATGTC	5
Primary_human_ATTCTACTCATCACCC	2
Primary_human_ATTCTACTCCTAGAAC	2
Primary_human_ATTCTACTCTGGTGTA	2
Primary_human_ATTGGACAGAGCTTCT	2
Primary_human_ATTGGACCACTATCTT	1
Primary_human_ATTGGACGTACCTACA	11
Primary_human_ATTGGACGTTCCATGA	3
Primary_human_ATTGGTGAGAGACGAA	2
Primary_human_ATTGGTGAGAGCAATT	2
Primary_human_ATTGGTGAGAGCTTCT	6
Primary_human_ATTGGTGAGCTACCGC	2
Primary_human_ATTGGTGAGCTCCTTC	7
Primary_human_ATTGGTGTCGAATGCT	4
Primary_human_ATTGGTGTCGGCTTGG	8
Primary_human_ATTTCTGAGTTCGCGC	2
Primary_human_CAACCAAAGCCGCCTA	9
Primary_human_CAACCAAAGTTGAGAT	3
Primary_human_CAACCAACAAGCGCTC	2
Primary_human_CAACCAAGTGCACCAC	4
Primary_human_CAACCTCAGTCTTGCA	3
Primary_human_CAACCTCCAATGCCAT	1
Primary_human_CAACCTCTCCGGGTGT	1
Primary_human_CAACTAGCAGCCTGTG	1
Primary_human_CAACTAGGTAGCTCCG	1
Primary_human_CAACTAGGTCGGCTCA	10
Primary_human_CAACTAGTCCTATTCA	1
Primary_human_CAAGAAAAGACTACAA	3
Primary_human_CAAGAAACAATGGATA	3
Primary_human_CAAGAAACATGCATGT	2
Primary_human_CAAGAAATCAAAGACA	4
Primary_human_CAAGATCGTTAAAGAC	5
Primary_human_CAAGATCGTTTAGGAA	11
Primary_human_CAAGATCTCGGTGTCG	5
Primary_human_CAAGGCCCAATGAAAC	1
Primary_human_CAAGGCCCACTGTTAG	5
Primary_human_CAAGGCCGTTACGACT	0
Primary_human_CAAGGCCGTTGCGTTA	3
Primary_human_CAAGGCCTCAAGAAGT	8
Primary_human_CAAGGCCTCATCTGCC	7
Primary_human_CAAGGCCTCGGAGGTA	0
Primary_human_CAAGTTGAGGAGTAGA	6
Primary_human_CAAGTTGGTACAGTGG	1
Primary_human_CAAGTTGGTTGATTGC	13
Primary_human_CAAGTTGGTTTCCACC	2
Primary_human_CAAGTTGGTTTGACTG	6
Primary_human_CAAGTTGTCCAAATGC	4
Primary_human_CAAGTTGTCGGAAACG	0
Primary_human_CAAGTTGTCGTCCGTT	6
Primary_human_CACAAACAGACATAAC	5
Primary_human_CACAAACAGTGAAGAG	4
Primary_human_CACAAACCAGGAATCG	1
Primary_human_CACAAACCATTTCAGG	4
Primary_human_CACAAACGTTAAAGTG	6
Primary_human_CACACAAAGGATGTAT	3
Primary_human_CACACAACACATGACT	0
Primary_human_CACACAACACCCAGTG	2
Primary_human_CACACAACACCGTTGG	7
Primary_human_CACACAAGTAAGCACG	3
Primary_human_CACACAAGTCATCCCT	1
Primary_human_CACACAATCAAAGACA	7
Primary_human_CACACAATCCTTCAAT	1
Primary_human_CACACCTAGACTGGGT	8
Primary_human_CACACCTAGTCGTTTG	2
Primary_human_CACACCTCAGCTTAAC	5
Primary_human_CACACCTCAGGACGTA	4
Primary_human_CACACCTCATCCAACA	5
Primary_human_CACACCTGTCGAAAGC	3
Primary_human_CACACCTGTTTGTGTG	1
Primary_human_CACACTCAGTTACCCA	0
Primary_human_CACACTCCAACACGCC	2
Primary_human_CACACTCCACGAAATA	1
Primary_human_CACACTCGTGTGACCC	9
Primary_human_CACACTCTCGCATGAT	5
Primary_human_CACACTCTCGGAATCT	6
Primary_human_CACACTCTCTTGACGA	4
Primary_human_CACAGGCGTTTGACAC	6
Primary_human_CACAGGCTCACCCTCA	6
Primary_human_CACAGGCTCGCACTCT	10
Primary_human_CACAGTACAGTCACTA	1
Primary_human_CACAGTAGTGCTAGCC	8
Primary_human_CACAGTATCTAACGGT	0
Primary_human_CACATAGAGATCGGGT	3
Primary_human_CACATAGCACGGATAG	4
Primary_human_CACATAGGTACCGTAT	1
Primary_human_CACATAGGTGAAGGCT	6
Primary_human_CACATAGGTTCATGGT	7
Primary_human_CACATTTAGAAGATTC	1
Primary_human_CACATTTAGAAGGCCT	1
Primary_human_CACATTTAGTACGATA	1
Primary_human_CACATTTGTAGATTAG	3
Primary_human_CACATTTGTCACTTCC	1
Primary_human_CACATTTTCCTCATTA	5
Primary_human_CACCACTAGAGGTACC	0
Primary_human_CACCACTGTTCACGGC	3
Primary_human_CACCACTTCCTAAGTG	1
Primary_human_CACCACTTCGTGGTCG	11
Primary_human_CACCAGGAGTCATCCA	3
Primary_human_CACCAGGGTCATGCAT	2
Primary_human_CACCAGGTCTTGCCGT	13
Primary_human_CACCTTGAGCTAGTGG	7
Primary_human_CACCTTGAGTCTCCTC	4
Primary_human_CACCTTGAGTGGACGT	2
Primary_human_CACCTTGCATGGGACA	0
Primary_human_CACCTTGGTTTAAGCC	7
Primary_human_CACTCCAAGTCCAGGA	8
Primary_human_CACTCCAAGTGTCTCA	13
Primary_human_CACTCCACACGAAACG	6
Primary_human_CACTCCACAGATGAGC	4
Primary_human_CACTCCAGTTCAGCGC	1
Primary_human_CACTCCATCATGGTCA	6
Primary_human_CAGAATCCATCATCCC	10
Primary_human_CAGAATCTCAACCATG	4
Primary_human_CAGAATCTCATTCACT	0
Primary_human_CAGAGAGAGCCTTGAT	2
Primary_human_CAGAGAGCAGACACTT	0
Primary_human_CAGAGAGCAGGCAGTA	3
Primary_human_CAGAGAGGTATGGTTC	4
Primary_human_CAGATCAAGACCACGA	5
Primary_human_CAGATCAAGGAGTTGC	3
Primary_human_CAGATCAAGTGTCCAT	2
Primary_human_CAGATCACAATCTGCA	2
Primary_human_CAGATCATCAATCACG	13
Primary_human_CAGATCATCATAACCG	3
Primary_human_CAGATCATCGTATCAG	2
Primary_human_CAGCAGCCAAGCCGCT	12
Primary_human_CAGCAGCCAGACAAGC	2
Primary_human_CAGCAGCGTGTATGGG	1
Primary_human_CAGCAGCTCAGAAATG	1
Primary_human_CAGCATACAATGACCT	6
Primary_human_CAGCATAGTCAGTGGA	5
Primary_human_CAGCATATCGATAGAA	5
Primary_human_CAGCCGAAGTGAATTG	2
Primary_human_CAGCCGAAGTGCGATG	2
Primary_human_CAGCCGAGTACAAGTA	13
Primary_human_CAGCGACAGTTATCGC	4
Primary_human_CAGCTAACAGGGTTAG	1
Primary_human_CAGCTAAGTATATCCG	1
Primary_human_CAGCTAATCCCTGACT	2
Primary_human_CAGCTGGAGAACAATC	5
Primary_human_CAGCTGGAGTGTACCT	3
Primary_human_CAGCTGGGTCCCGACA	0
Primary_human_CAGCTGGGTTCCGGCA	3
Primary_human_CAGCTGGTCAGAGGTG	2
Primary_human_CAGCTGGTCAGCTCTC	2
Primary_human_CAGCTGGTCTTCTGGC	6
Primary_human_CAGGTGCCACGGACAA	11
Primary_human_CAGGTGCCACTCGACG	0
Primary_human_CAGGTGCTCAGTCAGT	3
Primary_human_CAGTAACAGGATGGTC	4
Primary_human_CAGTAACAGTGGACGT	6
Primary_human_CAGTAACAGTTGAGAT	4
Primary_human_CAGTAACCAGTCGTGC	0
Primary_human_CAGTAACGTCAAACTC	0
Primary_human_CAGTAACGTTTGGCGC	1
Primary_human_CAGTAACTCCTGCCAT	3
Primary_human_CAGTCCTAGTCCAGGA	4
Primary_human_CAGTCCTCACAAGTAA	0
Primary_human_CAGTCCTTCAGCATGT	2
Primary_human_CAGTCCTTCGTGGTCG	2
Primary_human_CATATGGCAATGCCAT	4
Primary_human_CATATGGCAGGCAGTA	5
Primary_human_CATATGGCATTGGGCC	4
Primary_human_CATATGGGTTAGAACA	2
Primary_human_CATATTCAGGCGTACA	2
Primary_human_CATATTCAGGGATCTG	5
Primary_human_CATATTCCACATCCAA	3
Primary_human_CATATTCCATATACGC	1
Primary_human_CATATTCCATCAGTAC	0
Primary_human_CATATTCGTATATGGA	4
Primary_human_CATATTCGTCACAAGG	5
Primary_human_CATCAGAAGCGTAGTG	1
Primary_human_CATCAGAAGTTACGGG	3
Primary_human_CATCAGAGTACCGTTA	11
Primary_human_CATCCACCATACAGCT	1
Primary_human_CATCCACGTAGCGTCC	4
Primary_human_CATCCACGTCGCATCG	0
Primary_human_CATCCACGTGTTCGAT	3
Primary_human_CATCGAAAGGCGACAT	6
Primary_human_CATCGAAAGTCATGCT	7
Primary_human_CATCGAAAGTTCCACA	5
Primary_human_CATCGAACAAAGCGGT	2
Primary_human_CATCGAACATTCTCAT	0
Primary_human_CATCGAAGTTAAGAAC	9
Primary_human_CATCGGGAGTCTCCTC	6
Primary_human_CATCGGGCATTCCTCG	3
Primary_human_CATCGGGGTACCAGTT	2
Primary_human_CATCGGGGTTCACCTC	9
Primary_human_CATCGGGGTTCCACTC	1
Primary_human_CATCGGGGTTCGTTGA	2
Primary_human_CATGACAAGACGCAAC	4
Primary_human_CATGACAAGAGGTTAT	2
Primary_human_CATGACAAGTTATCGC	12
Primary_human_CATGACAGTCTCCCTA	2
Primary_human_CATGACAGTTGAGTTC	3
Primary_human_CATGACATCCAGGGCT	10
Primary_human_CATGACATCCCTCTTT	7
Primary_human_CATGACATCCCTTGTG	11
Primary_human_CATGACATCTTGTATC	6
Primary_human_CATGCCTAGCCCAATT	6
Primary_human_CATGCCTCACGAGAGT	11
Primary_human_CATGCCTGTACTTGAC	3
Primary_human_CATGCCTGTCACTGGC	5
Primary_human_CATGCCTGTCTTCTCG	2
Primary_human_CATGCCTTCGTAGATC	2
Primary_human_CATGGCGAGGGCTTGA	4
Primary_human_CATGGCGGTTGAACTC	2
Primary_human_CATGGCGTCGTACGGC	3
Primary_human_CATTATCAGACTCGGA	0
Primary_human_CATTATCGTTGATTCG	3
Primary_human_CATTATCTCCGAGCCA	2
Primary_human_CATTCGCAGTTACGGG	4
Primary_human_CATTCGCGTAAATGTG	0
Primary_human_CATTCGCTCACTTCAT	4
Primary_human_CATTCGCTCAGGTAAA	2
Primary_human_CCAATCCAGAGTACAT	0
Primary_human_CCAATCCAGCCTTGAT	2
Primary_human_CCAATCCCATTAGGCT	3
Primary_human_CCAATCCGTCCGAACC	3
Primary_human_CCAATCCGTCCGCTGA	4
Primary_human_CCACCTAGTATCGCAT	4
Primary_human_CCACCTATCATTATCC	3
Primary_human_CCACGGAAGAGGTACC	1
Primary_human_CCACGGACACAACGTT	8
Primary_human_CCACGGACACCTATCC	4
Primary_human_CCACGGAGTAGCGCAA	4
Primary_human_CCACGGAGTTCACGGC	2
Primary_human_CCACTACCAAGCCTAT	0
Primary_human_CCACTACCACTAAGTC	0
Primary_human_CCACTACGTCGTGGCT	3
Primary_human_CCACTACGTGGGTCAA	2
Primary_human_CCACTACGTTCCTCCA	6
Primary_human_CCACTACTCTGCCAGG	1
Primary_human_CCAGCGATCACCGGGT	2
Primary_human_CCAGCGATCGAATGCT	3
Primary_human_CCATGTCGTCGCATCG	8
Primary_human_CCATGTCTCGGCTTGG	1
Primary_human_CCATGTCTCGTTTGCC	2
Primary_human_CCATGTCTCTGCTGTC	1
Primary_human_CCATTCGAGCGTGTCC	5
Primary_human_CCATTCGCACCAACCG	9
Primary_human_CCATTCGGTCATATGC	4
Primary_human_CCCAATCAGCGTTGCC	3
Primary_human_CCCAATCAGGTGCACA	0
Primary_human_CCCAATCCAATCGAAA	1
Primary_human_CCCAGTTAGTGCGTGA	4
Primary_human_CCCAGTTGTCTGGAGA	0
Primary_human_CCCATACAGAGTACCG	0
Primary_human_CCCATACAGGACGAAA	13
Primary_human_CCCATACTCATTTGGG	3
Primary_human_CCCTCCTGTGATGATA	0
Primary_human_CCCTCCTTCGGTCCGA	1
Primary_human_CCGGGATCAATGTAAG	8
Primary_human_CCGGGATGTCACTTCC	0
Primary_human_CCGGGATGTCTCTTAT	6
Primary_human_CCGGGATGTCTTGATG	1
Primary_human_CCGGGATGTGCAACGA	0
Primary_human_CCGGGATTCTGCGACG	0
Primary_human_CCGGTAGGTAGCGCAA	1
Primary_human_CCGGTAGGTCAGATAA	4
Primary_human_CCGTACTAGACCCACC	8
Primary_human_CCGTACTCAGACAGGT	3
Primary_human_CCGTACTCAGCTGCAC	4
Primary_human_CCGTACTCAGCTGTGC	1
Primary_human_CCGTACTCATCTGGTA	3
Primary_human_CCGTACTGTCAGCTAT	0
Primary_human_CCGTGGAAGACTGGGT	8
Primary_human_CCGTGGAAGACTTTCG	2
Primary_human_CCGTGGACACCACCAG	2
Primary_human_CCGTGGACATGCCTAA	2
Primary_human_CCGTGGAGTAGCAAAT	2
Primary_human_CCGTGGAGTCTAGTGT	2
Primary_human_CCGTGGAGTGCTCTTC	6
Primary_human_CCGTGGATCATTGCCC	3
Primary_human_CCGTTCAAGATCACGG	3
Primary_human_CCGTTCACACCAACCG	13
Primary_human_CCGTTCACAGTATCTG	5
Primary_human_CCGTTCAGTACAGCAG	6
Primary_human_CCGTTCAGTCTGGAGA	1
Primary_human_CCGTTCATCAGTGTTG	5
Primary_human_CCTAAAGAGCTAAGAT	4
Primary_human_CCTAAAGAGCTCAACT	7
Primary_human_CCTAAAGCATGCTAGT	2
Primary_human_CCTACACAGGGCTTCC	1
Primary_human_CCTACACGTCCCGACA	7
Primary_human_CCTACACTCGTTTAGG	4
Primary_human_CCTACCAAGAAACGAG	2
Primary_human_CCTACCAGTCCAACTA	12
Primary_human_CCTACCAGTGAGGCTA	0
Primary_human_CCTACCATCCGAACGC	1
Primary_human_CCTACCATCTAGAGTC	1
Primary_human_CCTAGCTAGAGGACGG	5
Primary_human_CCTAGCTCAAGGGTCA	0
Primary_human_CCTAGCTGTTCCGTCT	0
Primary_human_CCTATTAAGGGTTCCC	4
Primary_human_CCTATTATCAACGGCC	7
Primary_human_CCTATTATCCCACTTG	2
Primary_human_CCTCAGTAGCAATCTC	11
Primary_human_CCTCAGTAGTGCGTGA	2
Primary_human_CCTCAGTTCCAATGGT	4
Primary_human_CCTCAGTTCTGATTCT	5
Primary_human_CCTCTGACATCAGTAC	8
Primary_human_CCTCTGAGTATCTGCA	2
Primary_human_CCTCTGATCACCGGGT	5
Primary_human_CCTCTGATCCGTTGTC	4
Primary_human_CCTTACGAGAAGGGTA	3
Primary_human_CCTTACGAGGATGCGT	3
Primary_human_CCTTACGGTTTAGCTG	0
Primary_human_CCTTCCCAGCGCCTCA	13
Primary_human_CCTTCCCTCAGTGCAT	1
Primary_human_CCTTCGAAGCGCTTAT	2
Primary_human_CCTTCGAAGTACTTGC	5
Primary_human_CCTTCGATCACGCGGT	9
Primary_human_CCTTTCTGTGCACCAC	1
Primary_human_CCTTTCTGTTATCACG	6
Primary_human_CCTTTCTTCGGCATCG	1
Primary_human_CGAACATAGATACACA	4
Primary_human_CGAACATAGCCCGAAA	4
Primary_human_CGAACATAGTACGTAA	4
Primary_human_CGAACATCAAGCCTAT	1
Primary_human_CGAACATCAGGAATGC	5
Primary_human_CGAACATCATGGATGG	4
Primary_human_CGAACATGTATATGGA	11
Primary_human_CGAACATGTGTTCGAT	6
Primary_human_CGAATGTGTTCCGTCT	6
Primary_human_CGACCTTAGTACTTGC	8
Primary_human_CGACCTTCAGATCGGA	7
Primary_human_CGACCTTGTTATGCGT	5
Primary_human_CGACCTTTCCCTAACC	7
Primary_human_CGACCTTTCGCATGGC	7
Primary_human_CGACTTCAGATATACG	12
Primary_human_CGACTTCAGTCATGCT	1
Primary_human_CGACTTCGTTATCCGA	2
Primary_human_CGACTTCTCACATACG	1
Primary_human_CGACTTCTCCGGCACA	4
Primary_human_CGAGAAGAGAGGGCTT	8
Primary_human_CGAGAAGGTCCGAATT	6
Primary_human_CGAGAAGGTCCGTGAC	7
Primary_human_CGAGAAGGTGCAGTAG	5
Primary_human_CGAGAAGTCACGCGGT	2
Primary_human_CGAGCACAGGCGCTCT	0
Primary_human_CGAGCACCAAGTCTGT	4
Primary_human_CGAGCCAAGCGTTGCC	1
Primary_human_CGAGCCAAGGTACTCT	2
Primary_human_CGAGCCAAGTGGAGTC	5
Primary_human_CGAGCCAGTATAAACG	1
Primary_human_CGAGCCATCCTATGTT	4
Primary_human_CGATCGGAGTATGACA	4
Primary_human_CGATCGGCACCAGCAC	3
Primary_human_CGATGGCAGATATGCA	10
Primary_human_CGATGGCCAACAACCT	3
Primary_human_CGATGGCTCTGAAAGA	1
Primary_human_CGATGTAAGAGGACGG	3
Primary_human_CGATGTAGTAATCACC	6
Primary_human_CGATGTAGTCCGAACC	10
Primary_human_CGATGTATCGGATGTT	2
Primary_human_CGATTGAAGTACGATA	13
Primary_human_CGATTGACAATAAGCA	0
Primary_human_CGATTGACATCCGGGT	7
Primary_human_CGATTGACATTCGACA	4
Primary_human_CGATTGAGTAACGTTC	0
Primary_human_CGCCAAGAGAAGGTTT	2
Primary_human_CGCCAAGAGATACACA	3
Primary_human_CGCCAAGAGCCACTAT	2
Primary_human_CGCCAAGTCCACTCCA	5
Primary_human_CGCGGTAAGAGGTAGA	3
Primary_human_CGCGGTAAGCACGCCT	0
Primary_human_CGCGGTACAGGGTATG	3
Primary_human_CGCGGTACAGGGTTAG	2
Primary_human_CGCGGTAGTCAATGTC	3
Primary_human_CGCGGTAGTGGTACAG	6
Primary_human_CGCGGTAGTGTTCGAT	2
Primary_human_CGCGGTATCTCCAGGG	2
Primary_human_CGCGTTTAGACATAAC	4
Primary_human_CGCGTTTAGTGGGTTG	0
Primary_human_CGCGTTTCACACGCTG	2
Primary_human_CGCGTTTCACGGACAA	7
Primary_human_CGCGTTTCAGAGTGTG	1
Primary_human_CGCGTTTCATTGGTAC	2
Primary_human_CGCGTTTTCTGGCGAC	0
Primary_human_CGCTATCAGTCATCCA	0
Primary_human_CGCTATCCACAAGACG	0
Primary_human_CGCTATCTCCGCAGTG	1
Primary_human_CGCTGGACACCAGGTC	0
Primary_human_CGCTGGATCCAAACAC	2
Primary_human_CGCTTCAAGACCGGAT	4
Primary_human_CGCTTCAAGAGTTGGC	1
Primary_human_CGCTTCAAGCGTAATA	2
Primary_human_CGCTTCATCAGAGGTG	7
Primary_human_CGGACACAGAAGAAGC	10
Primary_human_CGGACACGTTCCATGA	4
Primary_human_CGGACACTCCCAAGTA	5
Primary_human_CGGACGTAGGATCGCA	0
Primary_human_CGGACGTAGGTGCAAC	3
Primary_human_CGGACGTCACCTATCC	1
Primary_human_CGGACGTCACGGCGTT	2
Primary_human_CGGACGTCACTTCGAA	0
Primary_human_CGGACGTGTGGTGTAG	1
Primary_human_CGGACGTTCGAGAGCA	7
Primary_human_CGGACGTTCGCGGATC	12
Primary_human_CGGAGCTAGCCGGTAA	2
Primary_human_CGGAGCTAGCGATCCC	0
Primary_human_CGGAGCTAGGCAGTCA	3
Primary_human_CGGAGCTCAAACAACA	6
Primary_human_CGGAGCTGTCCGAGTC	2
Primary_human_CGGAGCTGTTCACGGC	8
Primary_human_CGGAGCTTCATGGTCA	1
Primary_human_CGGAGTCAGGAACTGC	0
Primary_human_CGGAGTCCAGATTGCT	1
Primary_human_CGGAGTCCATGCGCAC	0
Primary_human_CGGAGTCCATGGTTGT	0
Primary_human_CGGAGTCGTTTAAGCC	3
Primary_human_CGGAGTCTCCAAATGC	8
Primary_human_CGGAGTCTCTGTTTGT	3
Primary_human_CGGCTAGAGTCCATAC	9
Primary_human_CGGCTAGCAACGCACC	4
Primary_human_CGGCTAGGTGAGGCTA	6
Primary_human_CGGCTAGGTGTTTGTG	1
Primary_human_CGGCTAGTCCAAACTG	3
Primary_human_CGGGTCAGTGTCCTCT	1
Primary_human_CGGGTCATCCAAACTG	11
Primary_human_CGGTTAACAACAACCT	5
Primary_human_CGGTTAAGTAAGTGGC	5
Primary_human_CGGTTAATCCATTCTA	7
Primary_human_CGTAGCGCATCCGCGA	1
Primary_human_CGTAGCGCATGGGACA	11
Primary_human_CGTAGCGGTCCCGACA	3
Primary_human_CGTAGGCAGCACAGGT	6
Primary_human_CGTAGGCAGTAGTGCG	2
Primary_human_CGTAGGCCACACCGAC	0
Primary_human_CGTAGGCCAGGGCATA	0
Primary_human_CGTAGGCGTACGCACC	0
Primary_human_CGTAGGCGTCGGATCC	10
Primary_human_CGTCACTAGTGTGGCA	3
Primary_human_CGTCACTCACTTAAGC	4
Primary_human_CGTCACTTCACTTACT	5
Primary_human_CGTCAGGCACGACGAA	9
Primary_human_CGTCAGGGTATAAACG	6
Primary_human_CGTCAGGGTCCCTTGT	1
Primary_human_CGTCAGGGTGGCAAAC	2
Primary_human_CGTCCATAGCTGATAA	4
Primary_human_CGTCCATCAAGCGAGT	6
Primary_human_CGTCCATGTAGGGACT	8
Primary_human_CGTCCATGTCCGCTGA	11
Primary_human_CGTCCATGTGCATCTA	1
Primary_human_CGTCCATGTTCATGGT	8
Primary_human_CGTCTACCAGATGGGT	0
Primary_human_CGTCTACTCAGAGCTT	0
Primary_human_CGTGAGCAGAACTCGG	8
Primary_human_CGTGAGCAGCTCTCGG	0
Primary_human_CGTGTAAAGCAGGTCA	2
Primary_human_CGTGTAAAGTCGTTTG	5
Primary_human_CGTGTAACAAACCCAT	5
Primary_human_CGTGTAAGTGCAGTAG	6
Primary_human_CGTGTAAGTTGAACTC	4
Primary_human_CGTGTAATCTTGAGAC	0
Primary_human_CGTGTCTAGGTTACCT	0
Primary_human_CGTGTCTAGTCACGCC	7
Primary_human_CGTGTCTAGTGGACGT	2
Primary_human_CGTGTCTCATCGTCGG	0
Primary_human_CGTGTCTGTACGAAAT	1
Primary_human_CGTGTCTGTACTCGCG	4
Primary_human_CGTGTCTGTTAGGGTG	4
Primary_human_CGTTAGAAGCCATCGC	1
Primary_human_CGTTAGAAGTACTTGC	0
Primary_human_CGTTAGACAAACGTGG	2
Primary_human_CGTTAGACAAGGTGTG	0
Primary_human_CGTTAGACACACGCTG	7
Primary_human_CGTTAGACAGTTCCCT	1
Primary_human_CGTTAGACATCTCGCT	7
Primary_human_CGTTAGAGTAGCTCCG	7
Primary_human_CGTTAGAGTAGGACAC	3
Primary_human_CGTTAGATCCCTAACC	9
Primary_human_CGTTAGATCGAGAGCA	6
Primary_human_CGTTAGATCGGCCGAT	2
Primary_human_CGTTCTGCAAGCTGTT	1
Primary_human_CGTTCTGCAATAGCGG	1
Primary_human_CGTTCTGTCCTTTCGG	2
Primary_human_CGTTGGGCAGACAAAT	6
Primary_human_CGTTGGGCAGACACTT	7
Primary_human_CGTTGGGGTCTTGATG	10
Primary_human_CGTTGGGGTTAGATGA	0
Primary_human_CGTTGGGTCTGAGTGT	7
Primary_human_CTAACTTAGATCGATA	5
Primary_human_CTAACTTGTTGTCGCG	4
Primary_human_CTAAGACAGGTAGCCA	8
Primary_human_CTAAGACCACAACGTT	4
Primary_human_CTAAGACCAGTATCTG	2
Primary_human_CTAAGACCAGTGACAG	4
Primary_human_CTAAGACGTCTCGTTC	1
Primary_human_CTAATGGAGAACTCGG	1
Primary_human_CTAATGGCACCAGGCT	6
Primary_human_CTAATGGCAGGTGCCT	0
Primary_human_CTAATGGGTACCTACA	0
Primary_human_CTAATGGGTAGCGCAA	5
Primary_human_CTAATGGTCCGCGTTT	6
Primary_human_CTAATGGTCTGGTGTA	12
Primary_human_CTACACCAGACCACGA	1
Primary_human_CTACACCCATTTCAGG	0
Primary_human_CTACACCGTTCCCTTG	2
Primary_human_CTACATTAGACATAAC	1
Primary_human_CTACATTCAGATCCAT	4
Primary_human_CTACATTTCTACTCAT	3
Primary_human_CTACCCAAGGACACCA	0
Primary_human_CTACCCAAGGCTACGA	6
Primary_human_CTACCCACAAACGTGG	1
Primary_human_CTACCCACACGTAAGG	2
Primary_human_CTACCCAGTGAACCTT	2
Primary_human_CTACCCAGTGTGACCC	5
Primary_human_CTACCCATCCGCAAGC	2
Primary_human_CTACGTCAGATGCCTT	6
Primary_human_CTACGTCTCCGCTGTT	8
Primary_human_CTAGAGTAGCCACGCT	1
Primary_human_CTAGAGTAGGTTCCTA	5
Primary_human_CTAGAGTGTCTCCACT	3
Primary_human_CTAGAGTTCTTGTACT	4
Primary_human_CTAGCCTCAATGACCT	5
Primary_human_CTAGCCTCAGAGTGTG	2
Primary_human_CTAGCCTGTAAACACA	10
Primary_human_CTAGCCTGTAAGGGAA	1
Primary_human_CTAGCCTGTAATCGTC	1
Primary_human_CTAGCCTGTCTGCCAG	9
Primary_human_CTAGTGAAGAACAATC	2
Primary_human_CTAGTGAAGCCACCTG	0
Primary_human_CTAGTGAAGCCATCGC	6
Primary_human_CTAGTGATCGACAGCC	6
Primary_human_CTAGTGATCGTAGATC	2
Primary_human_CTCACACAGATCCGAG	3
Primary_human_CTCACACTCCTATTCA	3
Primary_human_CTCACACTCGCGTAGC	4
Primary_human_CTCAGAACACTGTTAG	1
Primary_human_CTCAGAATCATAGCAC	4
Primary_human_CTCATTAAGGCGACAT	0
Primary_human_CTCATTACAGGAATGC	5
Primary_human_CTCATTAGTACCATCA	12
Primary_human_CTCATTAGTTCCTCCA	2
Primary_human_CTCATTAGTTCTGAAC	3
Primary_human_CTCCTAGAGGATGTAT	4
Primary_human_CTCCTAGCACCACCAG	2
Primary_human_CTCCTAGCACTAAGTC	5
Primary_human_CTCCTAGGTGGCTCCA	10
Primary_human_CTCCTAGGTGTAATGA	0
Primary_human_CTCCTAGTCGCAAACT	13
Primary_human_CTCCTAGTCTTCATGT	1
Primary_human_CTCGAAAAGTCCATAC	3
Primary_human_CTCGAGGCATGAGCGA	5
Primary_human_CTCGAGGGTCACTTCC	0
Primary_human_CTCGAGGTCGACAGCC	5
Primary_human_CTCGGAGAGAGTGACC	2
Primary_human_CTCGGAGCAAGCGAGT	8
Primary_human_CTCGGAGCACCGTTGG	9
Primary_human_CTCGGAGGTATAATGG	9
Primary_human_CTCGGAGGTGGTGTAG	8
Primary_human_CTCGGAGTCATCGGAT	4
Primary_human_CTCGGGAAGCGCTCCA	4
Primary_human_CTCGGGAGTTATCCGA	3
Primary_human_CTCGTACAGAGTAATC	5
Primary_human_CTCGTACCAAAGCGGT	12
Primary_human_CTCGTACCAGGCGATA	8
Primary_human_CTCGTCAGTACCGCTG	0
Primary_human_CTCGTCATCTTGCATT	13
Primary_human_CTCTAATAGCCCTAAT	5
Primary_human_CTCTAATGTAACGCGA	3
Primary_human_CTCTAATGTGAAAGAG	2
Primary_human_CTCTAATTCGTCGTTC	2
Primary_human_CTCTACGAGCTAACTC	2
Primary_human_CTCTACGAGTGGTAAT	8
Primary_human_CTCTACGCAGCAGTTT	8
Primary_human_CTCTACGGTGTAACGG	1
Primary_human_CTCTACGTCAGGCAAG	0
Primary_human_CTCTGGTAGCCACCTG	6
Primary_human_CTCTGGTAGCTGTTCA	0
Primary_human_CTCTGGTGTAGCGCAA	11
Primary_human_CTCTGGTGTAGCTAAA	1
Primary_human_CTCTGGTTCTCAAGTG	0
Primary_human_CTCTGGTTCTTGCCGT	7
Primary_human_CTGAAACAGTGTACCT	3
Primary_human_CTGAAACGTACGCACC	3
Primary_human_CTGAAACGTGAGGGTT	0
Primary_human_CTGAAACTCAACACTG	9
Primary_human_CTGAAGTCAGCTGTTA	6
Primary_human_CTGAAGTGTGCACCAC	0
Primary_human_CTGAAGTTCATCGATG	0
Primary_human_CTGAAGTTCCGTAGGC	8
Primary_human_CTGAAGTTCTTCCTTC	2
Primary_human_CTGATAGAGCCACTAT	3
Primary_human_CTGATAGAGTGGAGTC	4
Primary_human_CTGATAGCATCCCATC	1
Primary_human_CTGATCCAGTGCTGCC	3
Primary_human_CTGATCCGTAAGCACG	7
Primary_human_CTGATCCTCTGGTGTA	5
Primary_human_CTGCCTAAGCGACGTA	4
Primary_human_CTGCCTAGTACTCTCC	6
Primary_human_CTGCCTAGTCCCTACT	8
Primary_human_CTGCCTAGTCTTCAAG	0
Primary_human_CTGCCTAGTGCTAGCC	1
Primary_human_CTGCCTATCAAACCAC	5
Primary_human_CTGCCTATCAGCTCGG	0
Primary_human_CTGCGGACAAAGCGGT	6
Primary_human_CTGCGGACAGATCGGA	5
Primary_human_CTGCGGAGTAGCTAAA	3
Primary_human_CTGCGGAGTCTGCGGT	4
Primary_human_CTGCGGAGTTGACGTT	7
Primary_human_CTGCGGATCATGTAGC	13
Primary_human_CTGCGGATCCCGACTT	0
Primary_human_CTGCGGATCGGCGGTT	0
Primary_human_CTGCTGTAGAGCTATA	4
Primary_human_CTGCTGTGTACCGTTA	2
Primary_human_CTGCTGTTCCAACCAA	1
Primary_human_CTGCTGTTCCGAATGT	0
Primary_human_CTGCTGTTCGTACCGG	3
Primary_human_CTGGTCTCAGGGTTAG	8
Primary_human_CTGGTCTGTCATGCAT	11
Primary_human_CTGTGCTAGGGAGTAA	0
Primary_human_CTGTGCTAGTGAATTG	0
Primary_human_CTGTGCTAGTGACTCT	6
Primary_human_CTGTGCTCACCATGTA	1
Primary_human_CTGTGCTGTAGCACGA	0
Primary_human_CTGTTTACACGGCTAC	0
Primary_human_CTGTTTAGTGCTAGCC	3
Primary_human_CTGTTTATCCAGAGGA	3
Primary_human_CTGTTTATCGAATCCA	3
Primary_human_CTTAACTGTGCCTGTG	7
Primary_human_CTTAACTGTTGGTGGA	1
Primary_human_CTTAACTTCGAGCCCA	1
Primary_human_CTTAACTTCTGACCTC	0
Primary_human_CTTACCGAGATGCCAG	2
Primary_human_CTTACCGAGCGTGTCC	3
Primary_human_CTTACCGAGCTTATCG	6
Primary_human_CTTACCGCAGCCTATA	13
Primary_human_CTTAGGAAGTGATCGG	0
Primary_human_CTTAGGATCCAACCAA	0
Primary_human_CTTCTCTCAGCGTAAG	3
Primary_human_CTTCTCTCATAGACTC	1
Primary_human_CTTCTCTGTAGCTTGT	4
Primary_human_CTTCTCTGTCGGCACT	5
Primary_human_CTTCTCTGTTAAAGTG	12
Primary_human_CTTCTCTTCGGCTACG	11
Primary_human_CTTCTCTTCGTTTATC	1
Primary_human_CTTGGCTAGCTTCGCG	3
Primary_human_CTTTGCGGTATAAACG	7
Primary_human_GAAACTCCACGAAATA	4
Primary_human_GAAACTCGTCTAGTGT	2
Primary_human_GAAATGACATTGTGCA	7
Primary_human_GAAATGATCACTCTTA	11
Primary_human_GAACATCAGGAGTTTA	4
Primary_human_GAACATCTCTGTCAAG	2
Primary_human_GAACCTAAGCGGATCA	5
Primary_human_GAACCTACAGTCGTGC	5
Primary_human_GAACCTATCCAAAGTC	3
Primary_human_GAACGGAAGACTAGGC	4
Primary_human_GAACGGAAGTCTCGGC	12
Primary_human_GAACGGACAGACGCTC	6
Primary_human_GAACGGATCCAGTAGT	3
Primary_human_GAAGCAGCACCTCGTT	8
Primary_human_GAAGCAGCACGAAATA	9
Primary_human_GAAGCAGGTTGAGTTC	13
Primary_human_GAATAAGCAACTTGAC	5
Primary_human_GAATAAGCACGACGAA	3
Primary_human_GAATAAGGTCGTCTTC	0
Primary_human_GAATAAGGTGATGTCT	5
Primary_human_GAATAAGTCCACGAAT	1
Primary_human_GAATGAAAGTTGTAGA	0
Primary_human_GAATGAACAGCTGTAT	2
Primary_human_GAATGAATCGCAGGCT	0
Primary_human_GACAGAGAGCAATCTC	1
Primary_human_GACAGAGAGCCACCTG	2
Primary_human_GACAGAGCAAGTCTGT	0
Primary_human_GACAGAGCAGACAAAT	2
Primary_human_GACAGAGCATTCACTT	3
Primary_human_GACAGAGCATTGTGCA	2
Primary_human_GACAGAGGTACAGACG	4
Primary_human_GACCAATCAGCGTAAG	0
Primary_human_GACCAATTCTCCAGGG	2
Primary_human_GACCTGGGTAAACACA	11
Primary_human_GACCTGGGTACCGGCT	4
Primary_human_GACGCGTAGTAGATGT	1
Primary_human_GACGGCTAGACGACGT	1
Primary_human_GACGGCTAGGGTCTCC	4
Primary_human_GACGGCTAGGTCGGAT	1
Primary_human_GACGGCTCACAACGTT	1
Primary_human_GACGGCTCATGCTGGC	1
Primary_human_GACGTGCAGGACTGGT	5
Primary_human_GACGTGCCACCAGGCT	5
Primary_human_GACGTGCCACGGCGTT	5
Primary_human_GACGTGCGTACAGACG	2
Primary_human_GACGTGCGTGCAACTT	5
Primary_human_GACGTGCTCAGGATCT	6
Primary_human_GACGTTAAGCGTTCCG	3
Primary_human_GACGTTAAGCTCCTTC	1
Primary_human_GACGTTAAGTGGCACA	3
Primary_human_GACGTTAGTATAGGTA	4
Primary_human_GACGTTAGTCGAATCT	1
Primary_human_GACGTTAGTGCACCAC	2
Primary_human_GACGTTAGTTGATTCG	0
Primary_human_GACGTTATCCAGAGGA	10
Primary_human_GACTAACAGCTACCGC	0
Primary_human_GACTAACAGTGGTCCC	5
Primary_human_GACTAACGTCTGATTG	5
Primary_human_GACTAACGTTCCACGG	2
Primary_human_GACTAACTCAGGTAAA	3
Primary_human_GACTGCGCACATAACC	7
Primary_human_GACTGCGGTACCATCA	2
Primary_human_GACTGCGGTAGGGACT	2
Primary_human_GAGCAGAAGCCTCGTG	4
Primary_human_GAGCAGACAATCAGAA	4
Primary_human_GAGCAGAGTTCCATGA	2
Primary_human_GAGCAGATCAATAAGG	4
Primary_human_GAGCAGATCAGTGTTG	13
Primary_human_GAGGTGAGTAAGAGGA	0
Primary_human_GAGGTGAGTCTAACGT	0
Primary_human_GAGGTGATCCTTGGTC	5
Primary_human_GAGGTGATCGCTTGTC	4
Primary_human_GAGTCCGAGGAATCGC	3
Primary_human_GAGTCCGAGGCATGTG	6
Primary_human_GAGTCCGAGGCCGAAT	3
Primary_human_GAGTCCGAGGGAGTAA	3
Primary_human_GAGTCCGAGGTAGCCA	3
Primary_human_GAGTCCGCAAGAAAGG	5
Primary_human_GAGTCCGCAGCCACCA	1
Primary_human_GAGTCCGGTAGCCTAT	0
Primary_human_GAGTCCGTCAAACGGG	8
Primary_human_GAGTCCGTCAACACTG	5
Primary_human_GAGTCCGTCCAAACAC	6
Primary_human_GAGTCCGTCCGTAGGC	9
Primary_human_GATCAGTGTGGCCCTA	5
Primary_human_GATCGATGTTGCGCAC	4
Primary_human_GATCGATTCAAAGACA	1
Primary_human_GATCGCGCATTGGCGC	0
Primary_human_GATCGCGGTATAGGGC	3
Primary_human_GATCGCGGTGTTCGAT	1
Primary_human_GATCGCGTCCGAATGT	1
Primary_human_GATCGTAAGATCCCAT	6
Primary_human_GATCGTAAGATCTGAA	5
Primary_human_GATCGTAAGCCACGTC	9
Primary_human_GATCGTAAGTGGTAGC	6
Primary_human_GATCGTACAACTGCTA	3
Primary_human_GATCGTACACTCAGGC	6
Primary_human_GATCGTACAGACAAGC	8
Primary_human_GATCGTAGTAGCTGCC	7
Primary_human_GATCGTAGTTAGTGGG	6
Primary_human_GATCGTATCCGCGGTA	0
Primary_human_GATCTAGAGTGTACGG	0
Primary_human_GATCTAGCAAGGTGTG	0
Primary_human_GATCTAGCACACGCTG	1
Primary_human_GATCTAGGTTATTCTC	3
Primary_human_GATGAAAAGCTCCCAG	5
Primary_human_GATGAAAGTAGCCTCG	0
Primary_human_GATGAAAGTTGTTTGG	0
Primary_human_GATGAAATCAGCTGGC	6
Primary_human_GATGAGGAGGAACTGC	5
Primary_human_GATGAGGGTACCGTTA	1
Primary_human_GATGAGGGTTATCGGT	2
Primary_human_GATGAGGTCGATGAGG	4
Primary_human_GATGAGGTCGCCAAAT	0
Primary_human_GATGCTAAGGGAACGG	10
Primary_human_GATGCTAGTAGTAGTA	1
Primary_human_GATGCTATCGGACAAG	0
Primary_human_GATTCAGAGCCCAGCT	10
Primary_human_GATTCAGCATCACGAT	1
Primary_human_GATTCAGCATCGTCGG	7
Primary_human_GATTCAGGTCGTGGCT	2
Primary_human_GATTCAGTCCAGGGCT	9
Primary_human_GATTCAGTCTCTGTCG	0
Primary_human_GCAAACTGTAGTGAAT	4
Primary_human_GCAATCACACCCATTC	0
Primary_human_GCAATCAGTGATGATA	6
Primary_human_GCAATCAGTGCCTTGG	5
Primary_human_GCAATCATCAGCCTAA	2
Primary_human_GCAATCATCGAATGGG	2
Primary_human_GCAATCATCGTGGACC	0
Primary_human_GCAATCATCTCGATGA	3
Primary_human_GCACATAAGATCCCAT	1
Primary_human_GCACATAAGCGATGAC	0
Primary_human_GCACATACAGACAAAT	9
Primary_human_GCACATAGTGCGAAAC	3
Primary_human_GCACATATCAATACCG	1
Primary_human_GCACTCTGTTATGCGT	7
Primary_human_GCAGCCAAGCGCTTAT	1
Primary_human_GCAGCCAAGGCAGTCA	3
Primary_human_GCAGCCAAGTATCGAA	5
Primary_human_GCAGCCACAACTGCGC	0
Primary_human_GCAGCCACAGGCGATA	9
Primary_human_GCAGCCAGTCCTCCAT	2
Primary_human_GCAGCCAGTCGCGTGT	3
Primary_human_GCAGCCATCGCGGATC	6
Primary_human_GCAGCCATCGGCGCAT	7
Primary_human_GCAGCCATCTCGGACG	7
Primary_human_GCAGTTAAGCTCCTTC	4
Primary_human_GCAGTTAAGGCTAGAC	7
Primary_human_GCAGTTACACCTGGTG	6
Primary_human_GCAGTTACAGTCTTCC	10
Primary_human_GCAGTTATCATGCATG	0
Primary_human_GCATACAAGAACTCGG	6
Primary_human_GCATACACAGACAAAT	1
Primary_human_GCATACAGTCGCTTCT	5
Primary_human_GCATACAGTCGTGGCT	7
Primary_human_GCATACAGTGCGGTAA	0
Primary_human_GCATGATAGCCCAGCT	0
Primary_human_GCATGATGTGCACTTA	2
Primary_human_GCATGATTCGGAAACG	0
Primary_human_GCATGATTCGTAGGAG	5
Primary_human_GCATGCGGTCACCCAG	8
Primary_human_GCATGCGTCTTTACGT	0
Primary_human_GCATGTACACGAGGTA	4
Primary_human_GCATGTATCTGTCAAG	3
Primary_human_GCCAAATAGGGCTTCC	10
Primary_human_GCCAAATCAATGGAGC	4
Primary_human_GCCAAATCATGTTCCC	3
Primary_human_GCCAAATGTACCTACA	0
Primary_human_GCCAAATTCATACGGT	5
Primary_human_GCCTCTAAGTCAAGGC	0
Primary_human_GCCTCTACACTCTGTC	7
Primary_human_GCGACCAAGCTGCAAG	8
Primary_human_GCGACCACAAGGTTCT	0
Primary_human_GCGACCACACGTGAGA	2
Primary_human_GCGACCAGTCTAAACC	3
Primary_human_GCGACCATCCACGACG	0
Primary_human_GCGAGAACACGAAACG	4
Primary_human_GCGAGAATCTGCTGTC	0
Primary_human_GCGCAACAGGGCATGT	5
Primary_human_GCGCAACGTACAAGTA	0
Primary_human_GCGCAGTAGACCGGAT	0
Primary_human_GCGCAGTCAGTACACT	4
Primary_human_GCGCAGTGTAAGTTCC	6
Primary_human_GCGCAGTGTGATGCCC	2
Primary_human_GCGCAGTTCACCACCT	3
Primary_human_GCGCCAAAGACCTAGG	5
Primary_human_GCGCCAAAGAGACGAA	6
Primary_human_GCGCCAAAGGACACCA	0
Primary_human_GCGCCAAAGGACTGGT	8
Primary_human_GCGCCAAGTAGTAGTA	0
Primary_human_GCGCCAAGTCCAGTAT	0
Primary_human_GCGCCAATCAGAGCTT	10
Primary_human_GCGCGATAGCCTTGAT	2
Primary_human_GCGCGATCAGCTGTTA	4
Primary_human_GCGCGATCATTCCTCG	10
Primary_human_GCGCGATTCAATAAGG	5
Primary_human_GCGCGATTCGATCCCT	8
Primary_human_GCGGGTTGTCGTTGTA	11
Primary_human_GCGGGTTGTTCCACAA	10
Primary_human_GCTCCTAAGAACTGTA	3
Primary_human_GCTCCTAAGCGTGAAC	1
Primary_human_GCTCCTAAGCGTTTAC	3
Primary_human_GCTCCTAGTACCTACA	8
Primary_human_GCTCTGTAGCACGCCT	0
Primary_human_GCTCTGTAGGTGACCA	3
Primary_human_GCTCTGTCAATGGATA	12
Primary_human_GCTCTGTCAGTCACTA	9
Primary_human_GCTCTGTGTACGCTGC	11
Primary_human_GCTCTGTGTCCAGTGC	2
Primary_human_GCTCTGTTCACAACGT	2
Primary_human_GCTGCAGAGCGTAATA	1
Primary_human_GCTGCAGAGGGTCTCC	1
Primary_human_GCTGCAGAGGTGACCA	1
Primary_human_GCTGCAGCAAGCGATG	7
Primary_human_GCTGCAGCACGTGAGA	7
Primary_human_GCTGCAGTCACTATTC	6
Primary_human_GCTGCGAGTCTAAACC	4
Primary_human_GCTGCGATCGTATCAG	8
Primary_human_GCTGCTTAGCGTCTAT	5
Primary_human_GCTGCTTAGGTAAACT	11
Primary_human_GCTGCTTGTCTCTCTG	0
Primary_human_GCTGCTTGTGTGACGA	0
Primary_human_GCTGCTTTCCTCCTAG	5
Primary_human_GCTGGGTAGCTGTCTA	0
Primary_human_GCTGGGTCAATTGCTG	3
Primary_human_GCTGGGTGTAAGTTCC	2
Primary_human_GCTGGGTGTAGCTAAA	1
Primary_human_GCTGGGTGTTGTCGCG	13
Primary_human_GCTTCCACAGTCACTA	8
Primary_human_GCTTCCATCAATCTCT	3
Primary_human_GCTTGAAAGCACCGTC	1
Primary_human_GCTTGAAAGGTTACCT	0
Primary_human_GCTTGAAGTCTCCCTA	0
Primary_human_GCTTGAATCACCGGGT	1
Primary_human_GCTTGAATCATAACCG	1
Primary_human_GCTTGAATCTGAAAGA	5
Primary_human_GGAAAGCAGGACTGGT	9
Primary_human_GGAAAGCCATTCGACA	0
Primary_human_GGAAAGCTCCACGTTC	1
Primary_human_GGAAAGCTCGCGTTTC	5
Primary_human_GGAACTTAGGTGTGGT	6
Primary_human_GGAACTTCAATGGAGC	8
Primary_human_GGAACTTCATAAGACA	1
Primary_human_GGAACTTGTTCTGTTT	7
Primary_human_GGAACTTTCCGTACAA	7
Primary_human_GGAACTTTCTCTTGAT	1
Primary_human_GGAATAAAGTCAATAG	0
Primary_human_GGAATAACATCAGTCA	9
Primary_human_GGAATAACATCGTCGG	7
Primary_human_GGAATAATCTACCAGA	11
Primary_human_GGACAAGAGCCAGTAG	5
Primary_human_GGACAAGAGCTCCCAG	4
Primary_human_GGACAAGCATCGGTTA	4
Primary_human_GGACAAGCATTGCGGC	2
Primary_human_GGACAAGGTAGAAGGA	0
Primary_human_GGACAAGGTTAAGATG	9
Primary_human_GGACAAGGTTGCGCAC	1
Primary_human_GGACAAGTCCTATTCA	1
Primary_human_GGACAGAGTCCGAAGA	3
Primary_human_GGACAGAGTCCGTTAA	5
Primary_human_GGACAGATCAGAGCTT	3
Primary_human_GGACAGATCATCTGTT	1
Primary_human_GGACAGATCGCAAACT	7
Primary_human_GGACATTAGGTGTTAA	2
Primary_human_GGACATTCAATAAGCA	6
Primary_human_GGACATTCACGCGAAA	2
Primary_human_GGACATTCAGTCAGAG	3
Primary_human_GGACATTGTCGAAAGC	2
Primary_human_GGACATTGTGTGCCTG	5
Primary_human_GGACATTTCAGGTAAA	7
Primary_human_GGACATTTCGGAAACG	10
Primary_human_GGACGTCAGTATCGAA	2
Primary_human_GGACGTCAGTCGCCGT	2
Primary_human_GGACGTCCACTCAGGC	0
Primary_human_GGACGTCTCTTCGAGA	9
Primary_human_GGAGCAACACCAGGCT	3
Primary_human_GGAGCAAGTGGCGAAT	1
Primary_human_GGATGTTCAGAGTGTG	1
Primary_human_GGATGTTCAGCTGGCT	1
Primary_human_GGATGTTTCTCAAACG	7
Primary_human_GGATTACCAGGTGCCT	3
Primary_human_GGATTACGTGCCTGCA	8
Primary_human_GGATTACTCAGGTTCA	2
Primary_human_GGATTACTCCTATGTT	0
Primary_human_GGCAATTGTCACACGC	1
Primary_human_GGCAATTTCGCAAGCC	1
Primary_human_GGCCGATAGATGTAAC	5
Primary_human_GGCCGATAGCCATCGC	0
Primary_human_GGCCGATGTTAAAGTG	8
Primary_human_GGCCGATTCCCTTGTG	1
Primary_human_GGCGACTAGTATGACA	5
Primary_human_GGCGACTCAATGGATA	6
Primary_human_GGCGACTGTCCGTCAG	4
Primary_human_GGCGACTGTCTTTCAT	3
Primary_human_GGCGACTGTGGGTATG	0
Primary_human_GGCGACTTCAAACGGG	7
Primary_human_GGCGACTTCTAACTGG	2
Primary_human_GGCGTGTCAGATGAGC	1
Primary_human_GGCGTGTGTCGTGGCT	0
Primary_human_GGCTCGAGTCAACTGT	3
Primary_human_GGCTCGAGTCCGAAGA	3
Primary_human_GGCTCGATCGCAAGCC	2
Primary_human_GGCTGGTAGAAAGTGG	5
Primary_human_GGCTGGTAGCCCAACC	0
Primary_human_GGCTGGTAGCGTGTCC	3
Primary_human_GGGAATGAGCTAAACA	0
Primary_human_GGGAATGAGGGTCGAT	1
Primary_human_GGGAATGCAGGGATTG	2
Primary_human_GGGAATGCATTGCGGC	1
Primary_human_GGGAATGGTATGAATG	2
Primary_human_GGGAATGGTTCGTGAT	13
Primary_human_GGGACCTAGTGTGGCA	6
Primary_human_GGGAGATCAAGCCATT	0
Primary_human_GGGAGATCAGCTGTGC	5
Primary_human_GGGAGATTCCGCATCT	5
Primary_human_GGGAGATTCTTACCTA	8
Primary_human_GGGATGACAATCTACG	1
Primary_human_GGGATGACATACAGCT	3
Primary_human_GGGATGATCTGCTGTC	2
Primary_human_GGGCACTCACCATCCT	0
Primary_human_GGGCACTGTCTCTCTG	5
Primary_human_GGGCACTGTGGTCTCG	3
Primary_human_GGGCATCCATTCTTAC	1
Primary_human_GGGCATCGTCAGAAGC	1
Primary_human_GGGCATCGTCGCATCG	4
Primary_human_GGGCATCGTCTAGCGC	0
Primary_human_GGGCATCTCAAACCGT	7
Primary_human_GGGTCTGAGAGGTTGC	0
Primary_human_GGGTCTGCAGACAAAT	2
Primary_human_GGGTCTGCATTTCACT	6
Primary_human_GGGTCTGGTCGCGGTT	0
Primary_human_GGGTCTGTCTGTACGA	2
Primary_human_GGGTTGCCACCCATTC	1
Primary_human_GGGTTGCCACTCTGTC	4
Primary_human_GGGTTGCGTAAGAGGA	2
Primary_human_GGGTTGCGTCTGATTG	8
Primary_human_GGGTTGCTCATTATCC	5
Primary_human_GGGTTGCTCTTTAGGG	5
Primary_human_GGTATTGAGCCACTAT	2
Primary_human_GGTATTGAGTCATGCT	1
Primary_human_GGTATTGCACAACGTT	2
Primary_human_GGTATTGCATGGTTGT	3
Primary_human_GGTATTGGTGCACTTA	8
Primary_human_GGTGAAGCAATAGCGG	4
Primary_human_GGTGAAGTCCTTTCGG	4
Primary_human_GGTGAAGTCGGTGTCG	0
Primary_human_GGTGAAGTCTGATACG	0
Primary_human_GGTGCGTCAAAGAATC	0
Primary_human_GGTGCGTCAGTCCTTC	7
Primary_human_GGTGCGTGTGTCCTCT	0
Primary_human_GGTGCGTTCTGCGACG	1
Primary_human_GGTGTTAAGGATGGAA	2
Primary_human_GGTGTTACACAAGCCC	5
Primary_human_GGTGTTAGTAAATGTG	0
Primary_human_GGTGTTATCCAGGGCT	8
Primary_human_GTAACGTCAAACCTAC	2
Primary_human_GTAACGTGTAGCTGCC	0
Primary_human_GTAACGTGTCAAACTC	0
Primary_human_GTAACGTGTTATTCTC	4
Primary_human_GTAACGTGTTCGCTAA	2
Primary_human_GTAACGTTCTCGTTTA	0
Primary_human_GTAACTGTCCCAACGG	1
Primary_human_GTACGTAAGACGCAAC	3
Primary_human_GTACGTAAGTAGCCGA	5
Primary_human_GTACTCCAGACTTTCG	9
Primary_human_GTACTCCAGCACAGGT	3
Primary_human_GTACTCCGTAATCGTC	0
Primary_human_GTACTCCTCACCTTAT	4
Primary_human_GTACTCCTCCAGATCA	2
Primary_human_GTACTCCTCCGCAAGC	1
Primary_human_GTACTTTAGAAGGCCT	0
Primary_human_GTACTTTAGCGTAATA	0
Primary_human_GTACTTTAGGTAAACT	1
Primary_human_GTACTTTGTGACCAAG	11
Primary_human_GTACTTTGTTAAAGAC	8
Primary_human_GTACTTTTCGAACTGT	1
Primary_human_GTAGGCCAGCTGGAAC	7
Primary_human_GTAGGCCAGGAATCGC	7
Primary_human_GTAGGCCCAATCCGAT	3
Primary_human_GTAGGCCCACATCCAA	6
Primary_human_GTAGGCCCACCTATCC	8
Primary_human_GTAGGCCTCACTGGGC	7
Primary_human_GTAGTCACAAGCGCTC	0
Primary_human_GTAGTCACAATACGCT	2
Primary_human_GTAGTCACATGCTAGT	3
Primary_human_GTAGTCAGTGTCCTCT	4
Primary_human_GTATCTTAGGCGATAC	2
Primary_human_GTATCTTAGGGATCTG	7
Primary_human_GTATCTTAGTACTTGC	2
Primary_human_GTATCTTAGTGCGTGA	0
Primary_human_GTATCTTGTTCGCGAC	3
Primary_human_GTATCTTTCCAAAGTC	3
Primary_human_GTATTCTAGTACGACG	1
Primary_human_GTATTCTCAGATCTGT	10
Primary_human_GTATTCTCAGTATCTG	2
Primary_human_GTATTCTTCCTCATTA	4
Primary_human_GTCAAGTAGCACACAG	0
Primary_human_GTCACAAAGGCGCTCT	5
Primary_human_GTCACAAGTAAGGATT	7
Primary_human_GTCACAAGTCTTGATG	5
Primary_human_GTCACAATCAACACTG	7
Primary_human_GTCACGGAGGACTGGT	1
Primary_human_GTCACGGCATCGACGC	0
Primary_human_GTCACGGGTTGACGTT	5
Primary_human_GTCACGGGTTGCGTTA	5
Primary_human_GTCACGGGTTTAGGAA	3
Primary_human_GTCACGGTCGTTGCCT	1
Primary_human_GTCATTTTCGACCAGC	3
Primary_human_GTCCTCAAGCTAACAA	5
Primary_human_GTCCTCAAGCTTCGCG	1
Primary_human_GTCCTCAGTCGAGATG	0
Primary_human_GTCCTCATCCGTACAA	0
Primary_human_GTCGGGTAGTGAACAT	0
Primary_human_GTCGGGTAGTTGAGTA	0
Primary_human_GTCGGGTCATCGTCGG	9
Primary_human_GTCGTAAAGTTTCCTT	7
Primary_human_GTCGTAAGTCATCGGC	4
Primary_human_GTCGTAATCAGATAAG	10
Primary_human_GTCTCGTAGGATGCGT	1
Primary_human_GTCTCGTCATTGAGCT	6
Primary_human_GTCTCGTGTGCTGTAT	1
Primary_human_GTCTCGTGTTGTACAC	10
Primary_human_GTCTTCGAGCGTTCCG	4
Primary_human_GTCTTCGGTAACGTTC	8
Primary_human_GTCTTCGGTTGACGTT	7
Primary_human_GTCTTCGTCTCCAACC	2
Primary_human_GTGAAGGAGCCCAACC	4
Primary_human_GTGAAGGAGGCGACAT	1
Primary_human_GTGAAGGGTAACGACG	1
Primary_human_GTGAAGGTCATGTCCC	7
Primary_human_GTGCAGCAGGAGTTTA	7
Primary_human_GTGCAGCAGTTCGATC	0
Primary_human_GTGCAGCGTCTGATCA	7
Primary_human_GTGCAGCTCAAGGTAA	0
Primary_human_GTGCAGCTCCATTCTA	5
Primary_human_GTGCAGCTCCCACTTG	0
Primary_human_GTGCATAAGAGGTTGC	11
Primary_human_GTGCATACATGCCTTC	1
Primary_human_GTGCTTCAGGTGACCA	1
Primary_human_GTGCTTCAGTTAACGA	7
Primary_human_GTGCTTCGTACCGAGA	0
Primary_human_GTGCTTCGTCGGATCC	3
Primary_human_GTGCTTCGTCTGCGGT	6
Primary_human_GTGCTTCGTGATGATA	1
Primary_human_GTGCTTCGTGCACCAC	1
Primary_human_GTGCTTCGTGGTCCGT	3
Primary_human_GTGCTTCTCAACCATG	8
Primary_human_GTGCTTCTCACCTTAT	0
Primary_human_GTGCTTCTCGGCATCG	3
Primary_human_GTGGGTCAGACATAAC	1
Primary_human_GTGGGTCAGTACACCT	2
Primary_human_GTGGGTCCATTCGACA	3
Primary_human_GTGGGTCGTAAGTAGT	2
Primary_human_GTGTGCGAGTCGTTTG	2
Primary_human_GTGTGCGAGTGCTGCC	5
Primary_human_GTGTGCGAGTTACCCA	1
Primary_human_GTGTGCGCAGATGGGT	2
Primary_human_GTGTGCGCATTTCAGG	7
Primary_human_GTGTTAGCACATTAGC	6
Primary_human_GTGTTAGTCTGGCGTG	2
Primary_human_GTTAAGCAGTATGACA	0
Primary_human_GTTAAGCCACCAACCG	5
Primary_human_GTTAAGCGTCGTCTTC	0
Primary_human_GTTAAGCTCGAGGTAG	7
Primary_human_GTTACAGAGACCTAGG	1
Primary_human_GTTACAGAGTGCCAGA	3
Primary_human_GTTACAGCAATGTTGC	3
Primary_human_GTTACAGGTCTTCAAG	1
Primary_human_GTTACAGTCAGCACAT	2
Primary_human_GTTCATTTCCCTAACC	1
Primary_human_GTTCGGGCATACGCCG	2
Primary_human_GTTCGGGCATGCAACT	1
Primary_human_GTTCGGGTCGGAATCT	11
Primary_human_GTTCTCGAGAATCTCC	0
Primary_human_GTTCTCGAGACCACGA	1
Primary_human_GTTCTCGAGAGCTATA	0
Primary_human_GTTCTCGAGGGTCGAT	2
Primary_human_GTTCTCGCAGCTGCAC	3
Primary_human_GTTCTCGCATTCCTGC	5
Primary_human_GTTCTCGTCACATAGC	1
Primary_human_GTTTCTAAGAGTGACC	0
Primary_human_GTTTCTAAGATCACGG	6
Primary_human_GTTTCTAAGTACGATA	1
Primary_human_GTTTCTAAGTAGGTGC	7
Primary_human_GTTTCTAGTAGCCTAT	1
Primary_human_GTTTCTATCCCATTAT	0
Primary_human_TAAACCGAGCCAACAG	1
Primary_human_TAAACCGAGGTGACCA	2
Primary_human_TAAACCGAGTGACATA	3
Primary_human_TAAACCGGTCAATACC	5
Primary_human_TAAACCGGTCGCGTGT	3
Primary_human_TAAACCGGTCTGGTCG	3
Primary_human_TAAACCGGTGTGACCC	0
Primary_human_TAAACCGTCAAAGACA	1
Primary_human_TAAACCGTCACATACG	1
Primary_human_TAAACCGTCTAACTCT	3
Primary_human_TAAGAGACACCAGGCT	6
Primary_human_TAAGAGAGTCTCATCC	0
Primary_human_TAAGAGATCAACACAC	3
Primary_human_TAAGCGTAGCTACCTA	3
Primary_human_TAAGCGTAGGCCCTTG	0
Primary_human_TAAGCGTTCTGTCAAG	0
Primary_human_TAAGTGCCAGATCCAT	6
Primary_human_TAAGTGCCATGTTCCC	2
Primary_human_TACACGAAGCATGGCA	8
Primary_human_TACACGACACCCATGG	9
Primary_human_TACAGTGCAATGGAAT	0
Primary_human_TACAGTGCATGGAATA	5
Primary_human_TACAGTGGTCCGTGAC	0
Primary_human_TACAGTGGTGCCTTGG	4
Primary_human_TACAGTGTCCTTGGTC	1
Primary_human_TACCTATCAAGCCGCT	6
Primary_human_TACCTATCAGATGAGC	10
Primary_human_TACCTATGTAACGACG	2
Primary_human_TACCTATGTACGACCC	7
Primary_human_TACCTATGTGCAGTAG	3
Primary_human_TACCTTAAGTGCGTGA	6
Primary_human_TACCTTACAGGATCGA	0
Primary_human_TACCTTACATCGGACC	2
Primary_human_TACGGATAGCCTATGT	9
Primary_human_TACGGATAGGGAAACA	1
Primary_human_TACGGATCAAAGTCAA	4
Primary_human_TACGGATGTAATCACC	3
Primary_human_TACGGATGTGTTTGTG	4
Primary_human_TACGGGCAGCATGGCA	8
Primary_human_TACGGGCAGCTGTTCA	0
Primary_human_TACGGGCAGGCTAGAC	9
Primary_human_TACGGGCAGTCCTCCT	5
Primary_human_TACGGGCCATACGCTA	11
Primary_human_TACGGGCTCTTTCCTC	6
Primary_human_TACGGTAAGGATCGCA	1
Primary_human_TACGGTAAGTACGTTC	1
Primary_human_TACGGTAAGTGAACAT	5
Primary_human_TACGGTAAGTGATCGG	1
Primary_human_TACGGTACATATGGTC	2
Primary_human_TACGGTACATCCTTGC	2
Primary_human_TACGGTAGTAAGTGTA	2
Primary_human_TACGGTAGTCTTCGTC	4
Primary_human_TACGGTATCCCTAACC	13
Primary_human_TACGGTATCCTCAATT	4
Primary_human_TACTCATAGTGTGGCA	4
Primary_human_TACTCATGTCTTGCGG	0
Primary_human_TACTCATTCTGTTTGT	2
Primary_human_TACTCGCAGCGCTCCA	3
Primary_human_TACTCGCCATTTGCTT	3
Primary_human_TACTCGCGTACATCCA	1
Primary_human_TACTCGCTCATGTGGT	3
Primary_human_TACTCGCTCGCGCCAA	7
Primary_human_TACTTACAGCTAAACA	4
Primary_human_TACTTACAGGCGACAT	1
Primary_human_TACTTACCACGGCCAT	5
Primary_human_TACTTACTCTCACATT	5
Primary_human_TACTTGTAGCCGGTAA	2
Primary_human_TACTTGTAGCTGCCCA	1
Primary_human_TACTTGTAGTTGTAGA	2
Primary_human_TACTTGTCATATACCG	2
Primary_human_TACTTGTTCACCGTAA	12
Primary_human_TAGACCAAGCAGCGTA	12
Primary_human_TAGACCACAAGCGCTC	8
Primary_human_TAGACCATCTTCATGT	3
Primary_human_TAGAGCTAGGCGACAT	12
Primary_human_TAGAGCTGTCTAGAGG	0
Primary_human_TAGAGCTGTCTGGAGA	0
Primary_human_TAGAGCTGTTCAGGCC	13
Primary_human_TAGAGCTTCGCCGTGA	8
Primary_human_TAGCCGGAGCTGCAAG	11
Primary_human_TAGCCGGAGTCAAGCG	4
Primary_human_TAGCCGGTCTATCCCG	3
Primary_human_TAGGCATCACAGTCGC	2
Primary_human_TAGGCATCAGTGACAG	3
Primary_human_TAGGCATCATCATCCC	8
Primary_human_TAGGCATCATTGGCGC	3
Primary_human_TAGGCATTCCATGAGT	2
Primary_human_TAGTGGTTCGCTAGCG	9
Primary_human_TAGTGGTTCTCGTATT	0
Primary_human_TAGTTGGAGAGCCCAA	1
Primary_human_TAGTTGGAGCCGTCGT	4
Primary_human_TAGTTGGAGGGAGTAA	3
Primary_human_TAGTTGGAGTCTCGGC	0
Primary_human_TAGTTGGCATATACCG	1
Primary_human_TAGTTGGGTCTCTTTA	5
Primary_human_TAGTTGGTCATGTCTT	0
Primary_human_TAGTTGGTCCAAAGTC	3
Primary_human_TAGTTGGTCCTCTAGC	0
Primary_human_TATCAGGGTGACGCCT	7
Primary_human_TATCAGGGTTTCGCTC	1
Primary_human_TATCAGGTCCTGTAGA	1
Primary_human_TATCAGGTCTGTCCGT	0
Primary_human_TATCTCAAGAGCAATT	6
Primary_human_TATCTCAAGATCTGCT	1
Primary_human_TATCTCAGTCCAACTA	1
Primary_human_TATCTCATCGCGTAGC	2
Primary_human_TATGCCCCAAGCCTAT	0
Primary_human_TATGCCCGTAGCGATG	5
Primary_human_TATGCCCTCAGCGATT	10
Primary_human_TATGCCCTCCGAATGT	9
Primary_human_TATTACCAGAATTCCC	2
Primary_human_TATTACCCACACTGCG	10
Primary_human_TATTACCCAGACAAAT	8
Primary_human_TATTACCCATTGGCGC	2
Primary_human_TATTACCGTCTTTCAT	6
Primary_human_TATTACCTCCTATGTT	5
Primary_human_TCAACGAAGTCGATAA	1
Primary_human_TCAACGACAAGTTAAG	2
Primary_human_TCAACGAGTAGCACGA	8
Primary_human_TCAACGAGTCCAGTTA	9
Primary_human_TCAACGAGTCTTTCAT	1
Primary_human_TCAATCTAGACTGGGT	7
Primary_human_TCAATCTAGGCAAAGA	7
Primary_human_TCAATCTAGGCCCGTT	2
Primary_human_TCAATCTCAAACTGCT	0
Primary_human_TCACAAGAGGACCACA	6
Primary_human_TCACGAACAAGACACG	0
Primary_human_TCACGAATCAATACCG	4
Primary_human_TCAGATGAGAAGGTGA	1
Primary_human_TCAGATGAGAATTCCC	3
Primary_human_TCAGATGAGCCACTAT	2
Primary_human_TCAGATGTCGTCTGCT	2
Primary_human_TCAGATGTCTGAGGGA	5
Primary_human_TCAGCAAGTTGAGGTG	0
Primary_human_TCAGCTCAGTCGAGTG	10
Primary_human_TCAGCTCCACTGCCAG	1
Primary_human_TCAGCTCCATCTACGA	3
Primary_human_TCAGGATAGCCAACAG	0
Primary_human_TCAGGATAGCGATCCC	1
Primary_human_TCAGGATCAAAGAATC	3
Primary_human_TCAGGATCAACACGCC	1
Primary_human_TCAGGATCAGCCAGAA	7
Primary_human_TCAGGATCATACGCTA	4
Primary_human_TCAGGATGTCTCAACA	4
Primary_human_TCAGGATTCCGTAGTA	7
Primary_human_TCAGGTAAGAAGGGTA	3
Primary_human_TCAGGTAAGCGTAATA	3
Primary_human_TCAGGTACAGCTCGAC	6
Primary_human_TCAGGTACATCGGGTC	1
Primary_human_TCAGGTAGTTACAGAA	6
Primary_human_TCAGGTAGTTCGTGAT	9
Primary_human_TCAGGTATCCTGCCAT	4
Primary_human_TCAGGTATCTCGATGA	2
Primary_human_TCATTACAGAAGCCCA	6
Primary_human_TCATTACCAGTTCATG	1
Primary_human_TCATTACGTCTAGTGT	13
Primary_human_TCATTTGAGAGACTTA	3
Primary_human_TCATTTGAGAGTAATC	5
Primary_human_TCATTTGGTATGCTTG	6
Primary_human_TCATTTGGTCTTGCGG	1
Primary_human_TCATTTGGTTCGAATC	2
Primary_human_TCATTTGTCCTAGTGA	0
Primary_human_TCCACACCATGCTAGT	2
Primary_human_TCCACACGTACAGTTC	5
Primary_human_TCCACACGTGAGGGTT	3
Primary_human_TCCCGATAGAAGGTGA	10
Primary_human_TCCCGATCAGACAAAT	2
Primary_human_TCCCGATCATGCCTAA	1
Primary_human_TCCCGATGTAGAGTGC	1
Primary_human_TCCCGATGTCTTCGTC	5
Primary_human_TCCCGATGTGATGATA	7
Primary_human_TCCCGATTCATGCAAC	2
Primary_human_TCCCGATTCTTGACGA	3
Primary_human_TCGAGGCAGCTAACAA	2
Primary_human_TCGAGGCCAGTAAGCG	5
Primary_human_TCGAGGCCAGTGACAG	2
Primary_human_TCGAGGCTCAAGCCTA	4
Primary_human_TCGAGGCTCAGCGACC	4
Primary_human_TCGCGAGAGATCTGCT	3
Primary_human_TCGCGAGCACAGCGTC	1
Primary_human_TCGCGAGCATGTTCCC	0
Primary_human_TCGCGAGGTGAGGGAG	6
Primary_human_TCGCGTTGTAAGCACG	0
Primary_human_TCGCGTTGTTACGACT	2
Primary_human_TCGCGTTGTTTGTTTC	1
Primary_human_TCGGGACAGGCCGAAT	1
Primary_human_TCGGGACCATGAAGTA	5
Primary_human_TCGGGACGTAGCTTGT	1
Primary_human_TCGGGACGTGACTACT	3
Primary_human_TCGGGACGTGATAAGT	3
Primary_human_TCGGGACTCTAGAGTC	3
Primary_human_TCGGTAACAAGCCGTC	6
Primary_human_TCGGTAACACGTTGGC	0
Primary_human_TCGGTAACATACAGCT	4
Primary_human_TCGGTAAGTGTTGAGG	13
Primary_human_TCGGTAATCCTGCCAT	0
Primary_human_TCGTACCAGATCACGG	5
Primary_human_TCGTACCAGCTTCGCG	2
Primary_human_TCGTACCTCCGAACGC	5
Primary_human_TCGTAGACAGGTCTCG	3
Primary_human_TCGTAGACAGTCTTCC	6
Primary_human_TCGTAGAGTAGCGATG	0
Primary_human_TCGTAGAGTATATCCG	4
Primary_human_TCGTAGAGTTTAGGAA	12
Primary_human_TCGTAGATCACTCCTG	4
Primary_human_TCTATTGAGGACCACA	3
Primary_human_TCTATTGAGGTGATTA	1
Primary_human_TCTATTGCACTACAGT	3
Primary_human_TCTATTGGTTATCGGT	3
Primary_human_TCTATTGTCAGGTAAA	6
Primary_human_TCTCATAAGTGCAAGC	0
Primary_human_TCTCATAGTAAATGTG	0
Primary_human_TCTCATAGTAGAGGAA	4
Primary_human_TCTCATAGTCTAAAGA	0
Primary_human_TCTCATATCAGTGCAT	12
Primary_human_TCTCATATCCTGCAGG	6
Primary_human_TCTCTAAAGGAGTCTG	3
Primary_human_TCTCTAACAACAACCT	7
Primary_human_TCTCTAACATTAGGCT	8
Primary_human_TCTCTAAGTAAACACA	12
Primary_human_TCTGAGAAGATGAGAG	0
Primary_human_TCTGAGACACTCTGTC	1
Primary_human_TCTGAGAGTCTCATCC	4
Primary_human_TCTGAGATCGGAATCT	8
Primary_human_TCTGGAACACCATGTA	3
Primary_human_TCTGGAAGTCCAAGTT	9
Primary_human_TCTGGAAGTTCCATGA	2
Primary_human_TCTTCGGAGGGAGTAA	8
Primary_human_TCTTCGGAGGTGCTTT	5
Primary_human_TCTTCGGGTACTCAAC	6
Primary_human_TCTTCGGGTCCTGCTT	10
Primary_human_TCTTCGGTCACTGGGC	10
Primary_human_TCTTCGGTCCCATTAT	2
Primary_human_TCTTTCCCAACACCCG	7
Primary_human_TCTTTCCCATGTTCCC	9
Primary_human_TCTTTCCGTATATGGA	1
Primary_human_TCTTTCCTCTACTCAT	13
Primary_human_TGAAAGAAGATCCCAT	3
Primary_human_TGAAAGACATGATCCA	1
Primary_human_TGAAAGAGTAAATGAC	10
Primary_human_TGAAAGATCTGGTATG	11
Primary_human_TGACAACCACTATCTT	2
Primary_human_TGACGGCAGACTAGGC	6
Primary_human_TGACGGCGTTCAACCA	2
Primary_human_TGACTAGAGGGTGTGT	11
Primary_human_TGACTAGCATGACGGA	8
Primary_human_TGACTAGGTGAGCGAT	3
Primary_human_TGACTAGGTTCCCGAG	0
Primary_human_TGACTAGTCCTAGTGA	2
Primary_human_TGACTTTAGAGGTACC	1
Primary_human_TGACTTTGTAGCCTCG	1
Primary_human_TGACTTTGTAGCGTGA	3
Primary_human_TGACTTTGTATAAACG	0
Primary_human_TGACTTTTCAAACGGG	5
Primary_human_TGACTTTTCTGTTGAG	5
Primary_human_TGAGAGGCACCACGTG	5
Primary_human_TGAGCATAGGGCTCTC	1
Primary_human_TGAGCATCACTAGTAC	3
Primary_human_TGAGCATTCCATTCTA	5
Primary_human_TGAGCATTCCGATATG	1
Primary_human_TGAGCATTCGGATGTT	2
Primary_human_TGAGCCGAGTTAAGTG	9
Primary_human_TGAGCCGGTATAGTAG	0
Primary_human_TGAGCCGGTTACAGAA	2
Primary_human_TGAGGGAAGAGCTTCT	3
Primary_human_TGAGGGAAGGGATACC	2
Primary_human_TGAGGGACACAGTCGC	2
Primary_human_TGAGGGATCGACGGAA	2
Primary_human_TGATTTCCAGTCGTGC	0
Primary_human_TGATTTCGTAGTAGTA	2
Primary_human_TGATTTCGTCTAAACC	3
Primary_human_TGATTTCGTTCCGGCA	10
Primary_human_TGATTTCTCACGCGGT	1
Primary_human_TGATTTCTCTTACCGC	9
Primary_human_TGCCAAACACATTCGA	0
Primary_human_TGCCAAATCAGTGCAT	12
Primary_human_TGCCCATGTAAATGAC	9
Primary_human_TGCCCATGTCATTAGC	4
Primary_human_TGCCCATGTGGGTATG	0
Primary_human_TGCCCATGTTACTGAC	2
Primary_human_TGCCCATTCAAACCAC	9
Primary_human_TGCCCATTCTGCTGTC	1
Primary_human_TGCCCTACAATAGCGG	0
Primary_human_TGCCCTATCGCACTCT	11
Primary_human_TGCCCTATCTTACCGC	6
Primary_human_TGCGCAGGTGCCTTGG	2
Primary_human_TGCGGGTAGGTGGGTT	10
Primary_human_TGCGGGTAGTGTTAGA	2
Primary_human_TGCGGGTCAATGGAGC	1
Primary_human_TGCGGGTCACAAGACG	8
Primary_human_TGCGGGTCAGATGGGT	9
Primary_human_TGCGGGTGTAAGTGTA	0
Primary_human_TGCGGGTGTCAGATAA	2
Primary_human_TGCGGGTGTTAGATGA	7
Primary_human_TGCGTGGAGTACGCCC	5
Primary_human_TGCGTGGCAATGGATA	7
Primary_human_TGCGTGGCACCCAGTG	2
Primary_human_TGCGTGGCACTCAGGC	7
Primary_human_TGCGTGGCAGATAATG	0
Primary_human_TGCGTGGGTGACGCCT	5
Primary_human_TGCGTGGTCGGAGGTA	10
Primary_human_TGCTACCAGGAGTTGC	5
Primary_human_TGCTACCAGGATATAC	2
Primary_human_TGCTACCAGTCAAGCG	3
Primary_human_TGCTACCCAATAAGCA	1
Primary_human_TGCTACCCACAGGTTT	12
Primary_human_TGCTACCCAGCCTATA	3
Primary_human_TGCTACCTCCTCCTAG	0
Primary_human_TGCTGCTGTACCGGCT	3
Primary_human_TGCTGCTGTTATCGGT	2
Primary_human_TGGACGCAGCAATATG	7
Primary_human_TGGACGCAGCCTATGT	3
Primary_human_TGGACGCCAGTATAAG	0
Primary_human_TGGACGCCAGTGACAG	1
Primary_human_TGGACGCTCAGCACAT	3
Primary_human_TGGACGCTCGCATGGC	0
Primary_human_TGGCCAGAGGAGCGTT	1
Primary_human_TGGCCAGCATTTCACT	4
Primary_human_TGGCCAGGTCTAGCGC	2
Primary_human_TGGCGCAAGAAACCGC	7
Primary_human_TGGCGCAAGGGATCTG	4
Primary_human_TGGCGCATCAATACCG	1
Primary_human_TGGCGCATCTTCAACT	12
Primary_human_TGGCTGGAGAATGTGT	10
Primary_human_TGGCTGGAGATAGTCA	2
Primary_human_TGGCTGGAGCTAAACA	4
Primary_human_TGGCTGGCAAGGTTCT	0
Primary_human_TGGCTGGCATGCAATC	4
Primary_human_TGGGAAGAGAGGTAGA	2
Primary_human_TGGGAAGAGGCGACAT	5
Primary_human_TGGGAAGCATCACAAC	9
Primary_human_TGGGAAGGTAAGGATT	0
Primary_human_TGGGAAGTCTGCTGCT	4
Primary_human_TGGGCGTAGCTGCGAA	5
Primary_human_TGGGCGTCAACTGCTA	6
Primary_human_TGGGCGTCATACGCCG	11
Primary_human_TGGGCGTGTCAGAATA	5
Primary_human_TGGTTAGAGCTGGAAC	0
Primary_human_TGGTTAGAGTGTTGAA	7
Primary_human_TGGTTAGGTGTTTGTG	2
Primary_human_TGGTTAGGTTCCACTC	0
Primary_human_TGGTTAGTCAAACCAC	6
Primary_human_TGGTTAGTCAGTGTTG	4
Primary_human_TGGTTCCCAAGAGTCG	7
Primary_human_TGGTTCCCAAGCCCAC	7
Primary_human_TGGTTCCCAAGTTGTC	2
Primary_human_TGGTTCCGTACTCGCG	2
Primary_human_TGGTTCCGTACTCTCC	0
Primary_human_TGGTTCCGTCTTGTCC	4
Primary_human_TGGTTCCGTGATAAGT	1
Primary_human_TGGTTCCTCGCGTTTC	0
Primary_human_TGTATTCAGCTTTGGT	0
Primary_human_TGTATTCAGGTAAACT	3
Primary_human_TGTATTCAGTGATCGG	1
Primary_human_TGTATTCAGTGTTAGA	5
Primary_human_TGTATTCCAAGGGTCA	4
Primary_human_TGTATTCGTCATTAGC	3
Primary_human_TGTATTCGTCTCTTTA	1
Primary_human_TGTATTCGTGTCCTCT	2
Primary_human_TGTATTCTCTGCAGTA	0
Primary_human_TGTCCCAAGGCGCTCT	0
Primary_human_TGTCCCACAATAGCAA	2
Primary_human_TGTCCCACAGGTCCAC	7
Primary_human_TGTCCCACATGGGAAC	6
Primary_human_TGTCCCATCGCCTGAG	5
Primary_human_TGTCCCATCTCCTATA	0
Primary_human_TGTGGTAAGATCCCGC	0
Primary_human_TGTGGTAAGCCAGAAC	5
Primary_human_TGTGGTAGTCAATACC	2
Primary_human_TGTGGTAGTCATTAGC	2
Primary_human_TGTGGTATCACCGTAA	0
Primary_human_TGTGGTATCCAAGTAC	0
Primary_human_TGTGTTTAGTGACTCT	1
Primary_human_TGTGTTTCAGTGACAG	3
Primary_human_TGTGTTTCATTCTCAT	0
Primary_human_TGTGTTTTCAGAAATG	7
Primary_human_TGTTCCGCACGGCGTT	4
Primary_human_TGTTCCGCACTAAGTC	8
Primary_human_TTAACTCAGCCGATTT	3
Primary_human_TTAACTCCAGGCGATA	6
Primary_human_TTAACTCGTGTGAAAT	0
Primary_human_TTAGGCAAGAATTCCC	0
Primary_human_TTAGGCAAGCCACGTC	2
Primary_human_TTAGTTCAGTCGCCGT	12
Primary_human_TTAGTTCCAAGAGTCG	3
Primary_human_TTAGTTCCACATCTTT	6
Primary_human_TTAGTTCGTGTTTGGT	6
Primary_human_TTAGTTCGTTATCACG	3
Primary_human_TTATGCTCATATGGTC	13
Primary_human_TTATGCTCATCAGTCA	5
Primary_human_TTATGCTGTTGTTTGG	9
Primary_human_TTATGCTTCTGGCGTG	5
Primary_human_TTCCCAGCATCGGGTC	2
Primary_human_TTCCCAGGTGTAACGG	2
Primary_human_TTCCCAGTCGTTTAGG	10
Primary_human_TTCGAAGAGCACAGGT	1
Primary_human_TTCGAAGAGGCATTGG	4
Primary_human_TTCGAAGGTCATCGGC	10
Primary_human_TTCGAAGGTGCCTGTG	0
Primary_human_TTCGAAGTCATGGTCA	1
Primary_human_TTCGAAGTCTCAAGTG	3
[truncated: 77 more rows]
