# Supplementary material for: Development and validation of an intra-tumor heterogeneity-related signature to predict prognosis of bladder cancer: a study based on single-cell RNA-seq
Source: Aging (Albany NY). 2021 Aug 2;13(15):19415–41. doi: 10.18632/aging.203353 (PMC8386527; doi:10.18632/aging.203353)
Supplement: Supplementary Table 3 [file aging-13-203353-s004.xls]

## Sheet: markers
Supplementary Table 3. The screened cell markers of 14 cell clusters.
p_val	avg_logFC	pct.1	pct.2	p_val_adj	cluster	gene
3.75624e-250	2.12807	0.807	0.055	5.34626e-246	0	CD3D
2.77561e-230	2.30816	0.655	0.024	3.95052e-226	0	GZMA
2.18013e-210	1.96295	0.658	0.035	3.10298e-206	0	CD3E
8.87321e-204	2.41008	0.722	0.069	1.26292e-199	0	CCL5
1.61664e-199	1.95108	0.722	0.064	2.30097e-195	0	CD2
7.87604e-180	2.19732	0.528	0.02	1.121e-175	0	GZMK
9.71877e-175	2.02367	0.864	0.197	1.38327e-170	0	TRAC
3.52805e-167	1.76704	0.835	0.175	5.02147e-163	0	CD52
8.57842e-157	1.62653	0.829	0.204	1.22097e-152	0	PTPRC
4.85749e-155	1.93805	0.563	0.044	6.91367e-151	0	TRBC1
1.07794e-152	1.76845	0.839	0.213	1.53423e-148	0	CXCR4
7.69196e-152	1.63555	0.934	0.401	1.0948e-147	0	IL32
1.82811e-149	0.518185	1	1	2.60195e-145	0	TMSB4X
3.06165e-149	0.566577	1	0.995	4.35764e-145	0	RPL28
4.91585e-148	0.639899	0.994	0.99	6.99673e-144	0	RPS15A
2.95102e-146	0.653511	0.991	0.998	4.20018e-142	0	RPS27
4.44752e-146	0.521746	1	1	6.33015e-142	0	B2M
2.51509e-145	0.601153	0.997	0.994	3.57973e-141	0	RPL23A
9.64013e-145	0.544134	1	0.999	1.37208e-140	0	RPL13A
1.20733e-142	0.725046	0.984	0.984	1.71839e-138	0	RPS29
2.98711e-142	0.524706	1	0.999	4.25155e-138	0	RPL10
3.2204e-142	0.59583	0.994	0.998	4.5836e-138	0	RPLP2
5.05593e-142	0.581302	0.994	0.997	7.1961e-138	0	RPL27A
6.10818e-141	0.571892	0.997	0.988	8.69378e-137	0	HLA-C
1.00447e-138	0.560535	1	0.99	1.42966e-134	0	MALAT1
5.873e-138	0.56929	0.991	0.996	8.35904e-134	0	RPS3
1.62553e-137	0.565496	0.997	0.994	2.31361e-133	0	RPS12
2.0157e-137	0.568286	0.997	0.989	2.86894e-133	0	HLA-B
3.0778e-137	0.550345	0.994	1	4.38064e-133	0	RPL13
1.13334e-135	0.519995	0.994	0.997	1.61308e-131	0	RPS2
1.24451e-135	0.606097	0.991	0.993	1.77131e-131	0	RPL30
1.5415e-135	0.552608	0.991	0.999	2.19402e-131	0	RPS27A
5.62717e-134	1.52339	0.813	0.235	8.00915e-130	0	CORO1A
1.51112e-133	0.504801	0.994	0.998	2.15077e-129	0	RPS19
1.60699e-133	0.505871	0.991	0.996	2.28723e-129	0	RPS15
1.7569e-133	0.562414	0.994	0.998	2.50059e-129	0	RPL21
3.63873e-133	2.10659	0.494	0.042	5.179e-129	0	NKG7
3.71906e-133	0.608854	0.981	0.989	5.29334e-129	0	HLA-A
3.0096e-132	0.54063	0.987	0.989	4.28356e-128	0	RPS16
2.51068e-131	0.507205	0.994	0.999	3.57345e-127	0	RPL41
8.46241e-130	1.80845	0.38	0.011	1.20445e-125	0	KLRB1
1.50263e-129	0.585049	0.984	0.994	2.1387e-125	0	RPS25
2.09585e-129	0.501747	0.994	0.997	2.98302e-125	0	RPL19
2.1653e-128	0.941491	0.959	0.889	3.08187e-124	0	BTG1
8.04367e-128	0.539554	0.987	0.994	1.14485e-123	0	RPS20
3.66832e-127	1.59893	0.509	0.048	5.22113e-123	0	LCK
4.51893e-127	0.519045	0.997	0.997	6.4318e-123	0	RPS18
4.65362e-127	0.51184	0.991	0.996	6.62349e-123	0	RPL18A
7.29347e-127	0.5431	0.997	0.998	1.03808e-122	0	RPL34
3.13424e-126	0.697644	0.987	0.982	4.46096e-122	0	HSP90AA1
1.19101e-125	0.536563	0.987	0.991	1.69517e-121	0	EIF1
2.00412e-125	0.534375	0.981	0.986	2.85246e-121	0	RPS7
1.21094e-124	0.517899	0.984	0.998	1.72353e-120	0	RPS14
1.60728e-124	0.576465	0.978	0.989	2.28765e-120	0	RPL31
1.47105e-123	0.565588	0.978	0.987	2.09374e-119	0	RPL14
2.53132e-123	0.586831	0.975	0.962	3.60283e-119	0	RPSA
5.98398e-123	1.59961	0.614	0.102	8.517e-119	0	CD48
4.42532e-122	0.598744	0.965	0.971	6.29855e-118	0	RPS26
4.79657e-122	0.516655	0.991	0.997	6.82696e-118	0	RPS6
3.22999e-121	0.505938	0.987	0.997	4.59724e-117	0	RPL35A
8.26184e-121	0.502613	0.991	0.995	1.17591e-116	0	RPS3A
3.11768e-120	0.5542	0.981	0.99	4.43739e-116	0	RPL39
7.41689e-120	0.501817	0.984	0.997	1.05565e-115	0	RPL3
8.27837e-118	0.501048	0.984	0.988	1.17826e-113	0	RPL18
5.95475e-117	1.56941	0.684	0.166	8.47539e-113	0	HCST
1.73245e-116	0.50223	0.981	0.993	2.4658e-112	0	RPL9
1.42221e-115	0.508621	0.975	0.991	2.02423e-111	0	FAU
6.36896e-114	-1.57403	0.028	0.835	9.06494e-110	0	GSN
2.31588e-113	0.500553	0.981	0.989	3.29619e-109	0	RPL6
3.276e-111	1.77312	0.345	0.014	4.66273e-107	0	IFNG
6.74427e-108	0.525144	0.962	0.982	9.59912e-104	0	UBB
3.94224e-107	1.49202	0.288	0.004	5.61099e-103	0	CD8A
5.64922e-107	0.713428	0.927	0.944	8.04053e-103	0	HSPA8
1.63066e-106	1.4757	0.396	0.028	2.32092e-102	0	CD3G
8.16873e-105	1.71662	0.573	0.113	1.16266e-100	0	CST7
6.98361e-102	1.49727	0.437	0.044	9.93977e-98	0	CD7
7.72925e-100	0.996519	0.908	0.806	1.1001e-95	0	DNAJB1
3.74208e-98	1.54626	0.611	0.134	5.3261e-94	0	CD69
1.10965e-97	-1.36349	0.044	0.798	1.57937e-93	0	GRN
9.65299e-97	-1.37579	0.013	0.736	1.37391e-92	0	RAB13
1.2009e-94	0.50271	0.943	0.98	1.70925e-90	0	RPL37
9.22658e-94	1.28273	0.259	0.005	1.31322e-89	0	TRAT1
2.91083e-93	1.34733	0.275	0.008	4.14298e-89	0	GZMM
9.83921e-92	1.48403	0.601	0.136	1.40041e-87	0	LTB
5.40259e-91	-1.1769	0.225	0.933	7.68951e-87	0	CST3
6.86059e-90	0.570527	0.93	0.956	9.76468e-86	0	DDX5
7.00118e-90	-1.27288	0.028	0.737	9.96478e-86	0	APP
7.72454e-90	0.509444	0.918	0.963	1.09943e-85	0	EEF1D
1.67123e-89	1.51275	0.269	0.009	2.37866e-85	0	GZMH
2.13335e-89	-1.25791	0.111	0.862	3.0364e-85	0	CD59
2.9172e-88	-1.14927	0.234	0.931	4.15205e-84	0	IFITM3
2.10675e-86	0.537694	0.934	0.982	2.99854e-82	0	HSP90AB1
4.693e-84	1.53008	0.525	0.118	6.67955e-80	0	ACAP1
4.98567e-84	-1.30184	0.054	0.746	7.0961e-80	0	IGFBP4
3.53973e-83	1.00495	0.842	0.624	5.0381e-79	0	ARHGDIB
5.99333e-83	1.37553	0.291	0.018	8.53031e-79	0	CTSW
1.38177e-82	0.895622	0.892	0.655	1.96668e-78	0	SRGN
5.33639e-82	0.516902	0.896	0.96	7.59529e-78	0	RPL38
8.42408e-82	0.808268	0.877	0.886	1.199e-77	0	DNAJA1
9.53689e-81	1.44904	0.547	0.136	1.35739e-76	0	CYTIP
5.94943e-80	-1.20742	0.032	0.696	8.46783e-76	0	WBP5
1.55221e-79	1.33198	0.304	0.023	2.20926e-75	0	CD96
1.24056e-78	-1.18568	0.035	0.695	1.76569e-74	0	ACTN1
4.69113e-78	1.60977	0.535	0.142	6.67689e-74	0	IL7R
5.8894e-78	-1.24954	0.009	0.643	8.38239e-74	0	PPIC
6.62515e-78	-1.43296	0.047	0.698	9.42957e-74	0	CALD1
4.17569e-76	-1.25229	0.025	0.663	5.94326e-72	0	FCGRT
6.61188e-76	1.40279	0.544	0.151	9.41069e-72	0	DOK2
7.52166e-75	-1.17089	0.247	0.856	1.07056e-70	0	IGFBP7
1.58087e-74	-1.23301	0.041	0.679	2.25005e-70	0	PDLIM1
2.0235e-74	0.706628	0.88	0.941	2.88004e-70	0	HSPA1A
2.99954e-74	-1.38851	0.006	0.617	4.26925e-70	0	PRKCDBP
3.82417e-74	-0.995846	0.032	0.669	5.44295e-70	0	TCEAL4
1.02651e-73	-0.96322	0.051	0.704	1.46104e-69	0	TNFRSF1A
3.18175e-73	1.45739	0.608	0.223	4.52858e-69	0	EVL
3.36442e-73	1.44757	0.639	0.25	4.78858e-69	0	DUSP2
7.46283e-73	1.24956	0.275	0.02	1.06219e-68	0	CD247
1.02428e-72	-1.13366	0.032	0.661	1.45786e-68	0	TAX1BP3
1.77677e-72	1.581	0.642	0.273	2.52887e-68	0	TRBC2
1.8635e-72	-1.23611	0.019	0.633	2.65232e-68	0	PTRF
5.48178e-72	-1.11377	0.092	0.756	7.80222e-68	0	CD9
2.0099e-71	-1.18419	0.019	0.627	2.86069e-67	0	MARCKS
2.60802e-71	-1.0532	0.12	0.81	3.712e-67	0	CD151
2.85362e-71	1.36932	0.272	0.02	4.06156e-67	0	PRF1
3.06429e-70	1.34493	0.509	0.131	4.3614e-66	0	IL2RG
3.84936e-70	-1.08186	0.025	0.633	5.4788e-66	0	PMP22
5.22437e-70	-1.07242	0.082	0.735	7.43585e-66	0	TSC22D1
5.53571e-70	-1.23714	0.089	0.715	7.87897e-66	0	SPARC
1.55242e-69	-1.29481	0.035	0.638	2.20956e-65	0	NNMT
4.06184e-69	1.17579	0.604	0.2	5.78121e-65	0	CD37
1.07072e-68	-0.979081	0.07	0.715	1.52396e-64	0	NGFRAP1
4.90711e-68	-0.914137	0.057	0.687	6.98429e-64	0	CYB5R3
5.28028e-68	-1.27394	0.032	0.628	7.51542e-64	0	GNG11
8.79573e-68	-0.967996	0.174	0.853	1.2519e-63	0	NPC2
2.63184e-67	-0.865975	0.041	0.652	3.7459e-63	0	SERPINB6
8.78691e-67	0.523467	0.864	0.882	1.25064e-62	0	SH3BGRL3
2.02337e-66	-1.17198	0.025	0.61	2.87986e-62	0	CNN3
3.99624e-66	-0.954897	0.063	0.684	5.68784e-62	0	YBX3
5.44861e-66	-1.41087	0.041	0.625	7.75501e-62	0	ADIRF
5.98102e-66	-1.01243	0.025	0.611	8.51279e-62	0	MGST2
9.64891e-66	0.601353	0.877	0.92	1.37333e-61	0	HLA-E
2.79428e-65	-0.978504	0.066	0.69	3.9771e-61	0	APLP2
3.78991e-65	-1.27283	0.022	0.594	5.39418e-61	0	CAV1
1.62571e-64	-0.911648	0.032	0.616	2.31388e-60	0	BRI3
1.76328e-64	-1.08404	0.022	0.595	2.50967e-60	0	EMP1
2.53897e-64	-0.97428	0.016	0.583	3.61372e-60	0	ASPH
6.20657e-64	-0.902013	0.203	0.894	8.83381e-60	0	LAPTM4A
6.23582e-64	-0.802198	0.073	0.695	8.87545e-60	0	ATOX1
7.62119e-64	-1.30382	0.035	0.608	1.08472e-59	0	MYL9
1.01145e-63	-1.10418	0.025	0.595	1.43959e-59	0	SOX4
1.31834e-63	0.848939	0.839	0.651	1.87639e-59	0	S100A4
2.51812e-63	-1.05501	0.009	0.563	3.58404e-59	0	TSPAN4
3.65213e-63	1.46952	0.623	0.287	5.19808e-59	0	RGCC
6.09784e-63	-0.935936	0.035	0.611	8.67905e-59	0	CTSL
7.58476e-63	-0.987892	0.032	0.605	1.07954e-58	0	RCN1
8.8837e-63	-1.41757	0.009	0.558	1.26442e-58	0	CYR61
1.70077e-62	-0.965954	0.016	0.572	2.42071e-58	0	EMP2
8.25255e-62	-0.864753	0.028	0.594	1.17459e-57	0	CTNNA1
3.62169e-61	-0.721724	0.092	0.719	5.15475e-57	0	LEPROT
5.09093e-61	1.22626	0.323	0.044	7.24592e-57	0	CD27
2.71624e-60	-0.906289	0.047	0.623	3.86602e-56	0	RRBP1
5.55866e-60	0.526917	0.826	0.917	7.91164e-56	0	RPS10
8.67628e-60	-0.948081	0.149	0.78	1.2349e-55	0	CTSB
1.00453e-59	0.612585	0.889	0.877	1.42974e-55	0	DUSP1
1.03704e-59	-0.892207	0.057	0.638	1.47602e-55	0	PRDX4
2.29631e-59	-1.25477	0.016	0.551	3.26833e-55	0	TIMP3
5.27511e-59	1.64002	0.437	0.111	7.50807e-55	0	CCL4
8.01405e-59	-1.0928	0.063	0.633	1.14064e-54	0	TPM1
8.42706e-59	-1.13521	0.025	0.566	1.19942e-54	0	MDK
1.12009e-58	-0.985507	0.013	0.542	1.59422e-54	0	PVRL2
1.21969e-58	-0.904687	0.041	0.599	1.73598e-54	0	PLD3
3.37272e-58	-0.910012	0.025	0.566	4.80039e-54	0	RAB34
3.72773e-58	-0.738216	0.057	0.628	5.30567e-54	0	OAZ2
6.3048e-58	0.56336	0.88	0.935	8.97363e-54	0	JUNB
7.23076e-58	-0.995808	0.028	0.57	1.02915e-53	0	PDLIM7
3.36961e-57	0.741156	0.81	0.862	4.79596e-53	0	HSPE1
3.76364e-57	-0.835584	0.146	0.768	5.35678e-53	0	ID3
7.20683e-57	-0.767962	0.082	0.672	1.02575e-52	0	PTTG1IP
7.44792e-57	-1.15942	0.006	0.518	1.06006e-52	0	TCF4
1.12061e-56	-0.993018	0.009	0.524	1.59496e-52	0	GAS6
1.4209e-56	-0.934983	0.038	0.58	2.02236e-52	0	CTSZ
3.24315e-56	0.844597	0.775	0.796	4.61598e-52	0	SARAF
4.22379e-56	-1.12551	0.073	0.629	6.01172e-52	0	TGFBI
4.86144e-56	-0.715803	0.111	0.727	6.91929e-52	0	PSMB5
1.92588e-55	-1.02194	0.076	0.639	2.74111e-51	0	S100A16
2.91956e-55	-0.883839	0.016	0.528	4.15541e-51	0	CD40
3.53557e-55	1.19957	0.551	0.19	5.03218e-51	0	RGS1
5.13213e-55	-1.1175	0.016	0.525	7.30455e-51	0	HES1
5.23533e-55	-1.30073	0.016	0.524	7.45145e-51	0	SERPING1
1.54196e-54	-0.757312	0.152	0.797	2.19468e-50	0	PTMS
1.74637e-54	1.19897	0.354	0.069	2.48561e-50	0	RHOH
1.85536e-54	-1.10474	0.104	0.652	2.64073e-50	0	IFI27
2.48625e-54	-0.93861	0.095	0.671	3.53868e-50	0	S100A13
3.59221e-54	-0.704848	0.06	0.611	5.11279e-50	0	CD81
6.33143e-54	-0.828576	0.225	0.87	9.01152e-50	0	GPX1
6.42321e-54	1.13221	0.297	0.044	9.14216e-50	0	SPOCK2
2.54254e-53	-0.83256	0.009	0.503	3.61879e-49	0	IFNGR2
2.65112e-53	-0.758903	0.044	0.574	3.77334e-49	0	LIMA1
5.45877e-53	0.964044	0.753	0.706	7.76947e-49	0	ZFP36L2
1.1101e-52	-0.780881	0.06	0.6	1.58001e-48	0	DUSP23
1.12277e-52	-0.657558	0.13	0.746	1.59804e-48	0	HSBP1
1.25708e-52	1.09332	0.525	0.193	1.7892e-48	0	CD53
1.29114e-52	-1.1439	0.07	0.591	1.83767e-48	0	CLU
1.57808e-52	-0.742583	0.032	0.543	2.24609e-48	0	PGRMC1
2.06159e-52	-1.05116	0.009	0.496	2.93426e-48	0	HTRA1
4.48099e-52	-0.95505	0.006	0.488	6.37779e-48	0	TIMP2
5.86633e-52	-0.894166	0.013	0.501	8.34955e-48	0	TUBB6
7.13655e-52	-0.959479	0.047	0.566	1.01575e-47	0	CRIP2
1.72397e-51	-0.904425	0.009	0.491	2.45373e-47	0	PPFIBP1
1.83414e-51	-0.9106	0.009	0.49	2.61054e-47	0	PKIG
2.02171e-51	-0.850867	0.057	0.582	2.8775e-47	0	IER3
3.81632e-51	-0.612525	0.07	0.612	5.43177e-47	0	SLC39A1
4.53153e-51	-0.794159	0.063	0.597	6.44973e-47	0	CALU
5.85541e-51	-0.781855	0.054	0.576	8.33401e-47	0	CSRP1
1.90444e-50	-0.729881	0.231	0.882	2.71059e-46	0	PSAP
2.11958e-50	1.20433	0.601	0.329	3.0168e-46	0	RARRES3
2.14332e-50	-0.953729	0.013	0.491	3.05058e-46	0	MMP14
2.58833e-50	-0.614069	0.111	0.692	3.68397e-46	0	OS9
4.25258e-50	-0.83753	0.019	0.501	6.0527e-46	0	PLS3
5.02968e-50	-0.641139	0.082	0.63	7.15874e-46	0	GNAI2
6.32817e-50	-1.04754	0.025	0.512	9.00688e-46	0	FSCN1
6.36812e-50	-0.973909	0.013	0.487	9.06375e-46	0	CAV2
8.71284e-50	-0.657608	0.168	0.799	1.2401e-45	0	CLTA
1.96367e-49	-0.901037	0.006	0.471	2.79489e-45	0	DST
2.84253e-49	-1.00941	0.022	0.499	4.04578e-45	0	ENG
6.03645e-49	-0.540346	0.085	0.631	8.59168e-45	0	DYNC1I2
6.08259e-49	-0.949476	0.032	0.513	8.65734e-45	0	PRCP
7.11959e-49	-0.577525	0.054	0.566	1.01333e-44	0	ATP6AP1
7.64552e-49	-0.90791	0.038	0.53	1.08819e-44	0	PRSS23
1.3704e-48	-0.62874	0.108	0.673	1.9505e-44	0	KDELR1
3.3188e-48	-0.701694	0.025	0.502	4.72365e-44	0	SCARB2
5.18985e-48	-0.998947	0.013	0.473	7.38672e-44	0	CPE
5.72255e-48	0.748414	0.782	0.787	8.1449e-44	0	KLF6
8.85209e-48	-0.755899	0.013	0.473	1.25992e-43	0	TRIP6
1.06708e-47	-0.787016	0.025	0.499	1.51877e-43	0	PON2
1.16261e-47	-0.841285	0.009	0.466	1.65475e-43	0	FAM213A
1.25901e-47	-0.990179	0.006	0.459	1.79195e-43	0	COL4A1
1.31292e-47	-0.659877	0.174	0.799	1.86867e-43	0	YWHAE
1.74039e-47	-1.05956	0.041	0.524	2.4771e-43	0	TINAGL1
2.02512e-47	-1.271	0.063	0.534	2.88236e-43	0	MGP
2.12402e-47	-0.553431	0.12	0.692	3.02311e-43	0	VKORC1
2.65727e-47	-0.9047	0.006	0.457	3.78209e-43	0	CFH
2.94972e-47	-0.627073	0.038	0.521	4.19833e-43	0	HSD17B12
3.06955e-47	-1.23951	0.025	0.486	4.36889e-43	0	TM4SF1
3.07256e-47	-0.705366	0.035	0.514	4.37317e-43	0	SCPEP1
3.12735e-47	-0.574121	0.111	0.671	4.45116e-43	0	ACADVL
5.23767e-47	-0.589859	0.076	0.596	7.45477e-43	0	AKR1A1
7.87009e-47	-1.1103	0.006	0.453	1.12015e-42	0	VCAN
8.01679e-47	-0.579616	0.047	0.538	1.14103e-42	0	HDLBP
9.83385e-47	-0.62155	0.079	0.598	1.39965e-42	0	RDX
1.0783e-46	-0.572673	0.054	0.551	1.53475e-42	0	ARL1
1.15989e-46	-0.752304	0.025	0.491	1.65087e-42	0	CREG1
1.34102e-46	-0.605829	0.035	0.511	1.90868e-42	0	SPTSSA
1.38314e-46	-0.672227	0.032	0.504	1.96862e-42	0	PEA15
1.68619e-46	-0.587235	0.054	0.549	2.39995e-42	0	EI24
2.74734e-46	1.23029	0.449	0.16	3.91028e-42	0	FYB
3.34106e-46	-0.538051	0.152	0.749	4.75534e-42	0	NUCB1
4.47762e-46	-0.861771	0.003	0.441	6.373e-42	0	EPHX1
6.23078e-46	-0.922066	0.006	0.447	8.86827e-42	0	HYAL2
7.26117e-46	-0.629205	0.032	0.499	1.03348e-41	0	VAMP3
7.46183e-46	-0.516135	0.149	0.742	1.06204e-41	0	TMEM14C
8.29436e-46	-0.700766	0.079	0.591	1.18054e-41	0	SYNGR2
8.52442e-46	-0.551608	0.073	0.584	1.21328e-41	0	NDUFC1
1.01307e-45	-0.97817	0.022	0.478	1.4419e-41	0	TGM2
1.14089e-45	-0.555267	0.142	0.727	1.62382e-41	0	GNB2
1.39428e-45	-0.631868	0.054	0.543	1.98447e-41	0	CAPNS1
1.58134e-45	-0.943177	0.003	0.438	2.25073e-41	0	FSTL1
1.5978e-45	-0.692377	0.234	0.866	2.27415e-41	0	TPM4
1.91966e-45	-0.53021	0.104	0.642	2.73225e-41	0	ARL2
2.13451e-45	-0.552198	0.104	0.644	3.03805e-41	0	LAMTOR2
2.33812e-45	0.827956	0.722	0.485	3.32784e-41	0	LAPTM5
2.48849e-45	1.13052	0.424	0.128	3.54187e-41	0	SAMSN1
2.80699e-45	-0.735379	0.003	0.436	3.99519e-41	0	IL13RA1
4.51016e-45	-0.806374	0.006	0.441	6.41932e-41	0	FAM114A1
4.63357e-45	-1.53183	0.022	0.459	6.59497e-41	0	SPARCL1
4.84544e-45	-0.627192	0.171	0.769	6.89652e-41	0	AP2S1
5.10003e-45	-0.564427	0.085	0.6	7.25887e-41	0	H2AFJ
5.2144e-45	-0.757336	0.101	0.626	7.42165e-41	0	LGALS3BP
7.25463e-45	-0.884886	0.003	0.433	1.03255e-40	0	RAB31
7.61404e-45	-0.579231	0.104	0.64	1.08371e-40	0	TIMM13
8.81621e-45	-0.872472	0.019	0.465	1.25481e-40	0	COL4A2
1.00667e-44	-0.606477	0.051	0.53	1.4328e-40	0	BAD
1.16092e-44	-0.566566	0.12	0.673	1.65233e-40	0	COMT
1.42877e-44	-0.617313	0.127	0.672	2.03357e-40	0	RHOB
1.66351e-44	-0.517013	0.082	0.595	2.36768e-40	0	NAA20
1.68701e-44	-0.752776	0.082	0.585	2.40111e-40	0	CTSH
1.86431e-44	-0.987498	0.013	0.448	2.65348e-40	0	KLF4
1.92375e-44	-0.517328	0.07	0.568	2.73807e-40	0	MLEC
2.19831e-44	0.595905	0.772	0.872	3.12885e-40	0	GLTSCR2
2.41272e-44	-0.911871	0.013	0.449	3.43402e-40	0	PDLIM4
2.79347e-44	-0.805462	0.006	0.435	3.97595e-40	0	RAB32
2.99021e-44	-0.654693	0.07	0.561	4.25596e-40	0	ASAH1
3.03387e-44	-0.525404	0.07	0.566	4.31811e-40	0	LAMP2
3.99796e-44	-0.567009	0.06	0.546	5.69029e-40	0	CHMP4B
4.92622e-44	-1.15867	0.025	0.468	7.01149e-40	0	A2M
5.5445e-44	-0.521754	0.127	0.681	7.89148e-40	0	MTCH1
6.77857e-44	-0.561305	0.054	0.53	9.64793e-40	0	MRPL32
6.83857e-44	-0.690097	0.009	0.439	9.73334e-40	0	LTBR
7.27296e-44	-1.08133	0.06	0.527	1.03516e-39	0	CTHRC1
8.6546e-44	-0.820667	0.003	0.425	1.23181e-39	0	UACA
1.2e-43	1.19179	0.326	0.077	1.70797e-39	0	BIN2
1.93949e-43	-0.569067	0.038	0.495	2.76047e-39	0	HEBP1
2.42533e-43	-0.502411	0.149	0.724	3.45197e-39	0	NUCKS1
2.43859e-43	-0.722363	0.225	0.823	3.47085e-39	0	DSTN
2.70362e-43	-0.62712	0.152	0.709	3.84806e-39	0	SERPINH1
2.8221e-43	-0.529688	0.082	0.585	4.01669e-39	0	ILK
3.26178e-43	-0.578769	0.066	0.551	4.64249e-39	0	CYSTM1
3.32033e-43	-0.675554	0.079	0.575	4.72582e-39	0	ARPC1A
4.08985e-43	-0.801535	0.003	0.421	5.82109e-39	0	NRP2
4.64304e-43	-0.563875	0.054	0.524	6.60844e-39	0	ANXA4
5.06621e-43	-0.659761	0.095	0.595	7.21073e-39	0	GLUL
6.4295e-43	-0.584727	0.085	0.588	9.15111e-39	0	SPATS2L
6.61606e-43	-0.625932	0.025	0.465	9.41664e-39	0	ZFYVE21
6.96004e-43	-0.886603	0.019	0.451	9.90623e-39	0	FHL2
7.49483e-43	-0.550343	0.047	0.511	1.06674e-38	0	CDK4
1.06921e-42	-0.544946	0.073	0.562	1.5218e-38	0	TMED3
1.07748e-42	-0.78118	0.016	0.444	1.53357e-38	0	AXL
1.19479e-42	-1.1196	0.025	0.455	1.70055e-38	0	C1R
1.34659e-42	-0.626788	0.016	0.443	1.9166e-38	0	COPRS
1.39704e-42	-0.585663	0.032	0.476	1.98841e-38	0	MVB12A
1.58718e-42	1.20757	0.472	0.18	2.25903e-38	0	BIRC3
1.67007e-42	-0.652104	0.035	0.482	2.37701e-38	0	IKBIP
2.51557e-42	-0.699757	0.003	0.415	3.5804e-38	0	CTTN
2.83807e-42	1.22617	0.354	0.097	4.03942e-38	0	TAGAP
3.0913e-42	-0.898303	0.003	0.414	4.39985e-38	0	MYLK
3.43534e-42	-1.11295	0.051	0.493	4.88952e-38	0	COL1A1
4.89333e-42	-0.748148	0.006	0.42	6.96468e-38	0	WWTR1
5.46007e-42	-0.645973	0.022	0.452	7.77131e-38	0	GOLIM4
5.52495e-42	-0.653552	0.032	0.471	7.86366e-38	0	CCDC50
8.36939e-42	-0.501241	0.066	0.541	1.19122e-37	0	CTNNB1
1.02234e-41	-0.771368	0.009	0.424	1.45509e-37	0	NRP1
1.89675e-41	-1.10222	0.047	0.482	2.69965e-37	0	COL1A2
2.14113e-41	-0.716155	0.003	0.408	3.04746e-37	0	TJP1
2.27508e-41	-0.55966	0.196	0.804	3.23813e-37	0	TMED9
2.46972e-41	0.944587	0.699	0.653	3.51516e-37	0	CACYBP
2.5472e-41	-0.990181	0.013	0.427	3.62543e-37	0	MXRA8
3.64189e-41	-0.553591	0.051	0.504	5.18351e-37	0	PFDN1
3.7959e-41	-0.589853	0.038	0.478	5.4027e-37	0	FAM127A
4.02455e-41	0.507416	0.769	0.894	5.72814e-37	0	RPL36AL
4.27586e-41	-0.784667	0.003	0.406	6.08583e-37	0	BACE2
5.68125e-41	-0.647485	0.013	0.425	8.08612e-37	0	FAM127B
7.97665e-41	-0.565138	0.054	0.508	1.13532e-36	0	NFIC
1.2567e-40	-0.573204	0.092	0.584	1.78867e-36	0	NME1
1.34077e-40	-0.7444	0.009	0.416	1.90832e-36	0	PLOD1
1.57665e-40	-0.835034	0	0.395	2.24405e-36	0	PALLD
1.67893e-40	-0.730687	0.013	0.421	2.38962e-36	0	CKAP4
1.73015e-40	-0.833518	0.089	0.566	2.46252e-36	0	MFGE8
1.79651e-40	-0.656437	0.123	0.638	2.55698e-36	0	TXNDC17
1.80399e-40	-0.743716	0.019	0.434	2.56762e-36	0	NET1
2.13964e-40	-0.552761	0.035	0.466	3.04535e-36	0	CRTAP
2.24164e-40	-1.0078	0	0.394	3.19052e-36	0	C10orf10
2.4163e-40	-0.531477	0.051	0.499	3.43913e-36	0	QSOX1
2.47611e-40	-0.774321	0.07	0.533	3.52425e-36	0	SLC16A3
2.59072e-40	-0.548138	0.051	0.499	3.68737e-36	0	AGPAT2
2.62271e-40	-0.627798	0.424	0.911	3.7329e-36	0	TIMP1
2.62807e-40	-0.877172	0.009	0.413	3.74053e-36	0	MAP1B
2.73103e-40	-0.838856	0.104	0.58	3.88707e-36	0	PLAU
2.80949e-40	-0.528606	0.095	0.587	3.99874e-36	0	PLSCR1
3.10184e-40	-0.563442	0.025	0.446	4.41485e-36	0	TSPAN3
3.55061e-40	1.18046	0.43	0.153	5.05359e-36	0	GPR183
4.34137e-40	-0.679357	0.288	0.887	6.17907e-36	0	FKBP1A
5.62437e-40	-0.529305	0.051	0.496	8.00517e-36	0	VGLL4
5.97895e-40	-0.600523	0.013	0.417	8.50984e-36	0	MRPL15
6.03624e-40	-1.02076	0.028	0.443	8.59137e-36	0	CTGF
6.13082e-40	-0.721508	0.009	0.41	8.726e-36	0	PHLDA3
6.35884e-40	1.25421	0.481	0.214	9.05054e-36	0	TNFAIP3
6.49285e-40	1.16207	0.31	0.074	9.24127e-36	0	PTPN7
6.72437e-40	-0.572228	0.044	0.482	9.57079e-36	0	BLVRB
7.44427e-40	-0.640889	0.009	0.41	1.05954e-35	0	MYL6B
7.63841e-40	0.524729	0.756	0.89	1.08718e-35	0	TOMM7
7.9024e-40	-0.518786	0.047	0.488	1.12475e-35	0	GINM1
8.5308e-40	-0.504717	0.092	0.579	1.21419e-35	0	YIPF3
9.39152e-40	-0.768527	0.054	0.492	1.33669e-35	0	NBL1
1.02507e-39	-0.728066	0.003	0.396	1.45899e-35	0	A4GALT
1.11258e-39	-0.916617	0.006	0.402	1.58354e-35	0	MMP2
1.11348e-39	-0.54708	0.095	0.584	1.58481e-35	0	LMAN1
1.18039e-39	-0.642534	0.006	0.402	1.68005e-35	0	TPBG
1.33798e-39	-1.1408	0.009	0.406	1.90434e-35	0	IGFBP5
1.43601e-39	-0.776167	0.009	0.408	2.04387e-35	0	TGFB1I1
1.5061e-39	-1.04056	0.025	0.435	2.14364e-35	0	SERPINA1
1.5346e-39	-0.675442	0	0.388	2.18419e-35	0	SEPT10
1.72324e-39	-0.773891	0.003	0.394	2.45269e-35	0	GJA1
1.74086e-39	-0.554324	0.092	0.571	2.47776e-35	0	LAP3
1.80409e-39	-0.7022	0.009	0.407	2.56776e-35	0	CLIC4
1.82605e-39	-0.919747	0	0.387	2.59902e-35	0	GPNMB
1.96839e-39	-0.679475	0.006	0.4	2.80161e-35	0	CD276
3.17067e-39	-0.528605	0.051	0.49	4.51281e-35	0	ARL3
3.50982e-39	-0.540414	0.047	0.483	4.99553e-35	0	ISOC2
3.56048e-39	-0.614308	0.025	0.437	5.06763e-35	0	GRINA
3.66421e-39	-1.09145	0.013	0.408	5.21527e-35	0	NUPR1
3.75201e-39	-0.783587	0.006	0.398	5.34023e-35	0	JAG1
4.85293e-39	-0.560114	0.032	0.45	6.90717e-35	0	CLTC
5.19849e-39	-0.573641	0.073	0.534	7.39901e-35	0	PLIN3
7.29641e-39	-0.869048	0	0.383	1.0385e-34	0	TFPI
1.03463e-38	-0.760887	0.044	0.47	1.47259e-34	0	ETS2
1.12375e-38	-0.965327	0.003	0.388	1.59944e-34	0	LHFP
1.24212e-38	-0.735509	0.013	0.407	1.76792e-34	0	DAB2
1.33498e-38	-0.54449	0.044	0.472	1.90007e-34	0	SEC61A1
1.34209e-38	-0.557971	0.177	0.746	1.91019e-34	0	KDELR2
1.42626e-38	-0.506388	0.06	0.505	2.03e-34	0	C1orf122
1.69944e-38	-0.696061	0.009	0.4	2.41882e-34	0	LAMB1
1.87972e-38	-0.589175	0.139	0.645	2.67541e-34	0	EGR1
2.19965e-38	-0.512546	0.044	0.471	3.13076e-34	0	FEZ2
2.69666e-38	-0.585768	0.022	0.425	3.83816e-34	0	AK1
3.45583e-38	-1.00008	0.003	0.384	4.91868e-34	0	SEPP1
4.21628e-38	-0.731193	0.013	0.403	6.00104e-34	0	PLTP
4.6652e-38	-0.721203	0.114	0.592	6.63997e-34	0	SELM
4.81864e-38	-0.850533	0	0.376	6.85836e-34	0	SDC2
5.57481e-38	-0.556531	0.035	0.448	7.93463e-34	0	DAP
7.27937e-38	-0.62063	0.006	0.388	1.03607e-33	0	MPZL1
7.71275e-38	-0.850629	0.013	0.4	1.09776e-33	0	AKAP12
1.00652e-37	-0.596217	0.443	0.959	1.43257e-33	0	CD63
1.03318e-37	-0.656908	0.006	0.387	1.47052e-33	0	GOLM1
1.04304e-37	-0.536294	0.016	0.407	1.48456e-33	0	MANBAL
1.45355e-37	-0.534884	0.165	0.711	2.06884e-33	0	PHPT1
1.71884e-37	-0.55423	0.044	0.463	2.44642e-33	0	SMIM14
1.87859e-37	-0.67766	0	0.372	2.6738e-33	0	PFN2
1.97261e-37	-0.500452	0.035	0.444	2.80761e-33	0	C1orf123
2.31338e-37	-0.588894	0.022	0.417	3.29263e-33	0	MEF2A
2.61239e-37	-0.50838	0.032	0.437	3.71821e-33	0	DYNC1LI2
2.65436e-37	-0.733319	0.025	0.421	3.77796e-33	0	CSRP2
2.69444e-37	-0.719296	0.032	0.435	3.835e-33	0	RBP1
2.84624e-37	-0.587553	0.013	0.397	4.05106e-33	0	FNDC3B
3.63593e-37	-0.57464	0.234	0.828	5.17501e-33	0	LGALS3
3.68877e-37	-0.873069	0.016	0.403	5.25022e-33	0	CCND1
3.73468e-37	-0.520939	0.047	0.467	5.31557e-33	0	TPD52L2
3.80082e-37	-0.953973	0.013	0.394	5.40971e-33	0	COL6A1
4.43826e-37	-0.651569	0.098	0.563	6.31698e-33	0	FAM3C
4.68225e-37	-0.695454	0.006	0.382	6.66425e-33	0	EPS8
5.13662e-37	-0.863665	0.006	0.381	7.31096e-33	0	SLC9A3R2
5.34632e-37	-0.671573	0.009	0.388	7.60941e-33	0	TUSC3
5.82508e-37	-1.11009	0.019	0.402	8.29084e-33	0	TPM2
6.41793e-37	-0.508685	0.025	0.421	9.13463e-33	0	TMEM9
6.89578e-37	-0.719523	0.044	0.457	9.81476e-33	0	PHLDA2
7.26859e-37	-0.743007	0.006	0.38	1.03454e-32	0	MGLL
8.08265e-37	-0.510543	0.06	0.491	1.1504e-32	0	AP1S1
1.11739e-36	-0.830103	0.019	0.405	1.59037e-32	0	SERINC2
1.35683e-36	1.05742	0.259	0.054	1.93118e-32	0	TBC1D10C
1.37274e-36	-0.68839	0.003	0.372	1.95381e-32	0	RAI14
1.43754e-36	-0.857169	0.016	0.396	2.04605e-32	0	HSPG2
1.7563e-36	-0.561169	0.009	0.384	2.49974e-32	0	TP53I3
2.10808e-36	-0.677408	0.006	0.377	3.00043e-32	0	HNMT
2.40228e-36	-0.549442	0.022	0.409	3.41916e-32	0	MSRB2
2.74783e-36	0.97757	0.484	0.219	3.91099e-32	0	LSP1
3.88005e-36	-0.526589	0.028	0.421	5.52248e-32	0	MCFD2
4.17627e-36	-0.612961	0.006	0.375	5.94408e-32	0	FKBP9
5.0463e-36	-0.877289	0.003	0.367	7.1824e-32	0	INHBA
5.71915e-36	-0.726729	0.006	0.374	8.14006e-32	0	TSPAN13
6.36664e-36	-0.747954	0	0.36	9.06164e-32	0	C9orf3
7.22953e-36	-0.575031	0.032	0.425	1.02898e-31	0	AIG1
7.95153e-36	-0.533624	0.022	0.405	1.13174e-31	0	AAMDC
9.97711e-36	-0.63285	0.003	0.365	1.42004e-31	0	SNX7
1.1167e-35	-0.681412	0.098	0.552	1.58939e-31	0	PLAUR
1.26526e-35	-0.781901	0.003	0.364	1.80085e-31	0	GPX3
1.45804e-35	-0.639915	0	0.357	2.07522e-31	0	RHOBTB3
1.45804e-35	-0.899745	0	0.357	2.07522e-31	0	CCDC80
1.51069e-35	-0.774735	0.035	0.426	2.15016e-31	0	SNCG
1.51893e-35	-0.640066	0.009	0.377	2.16189e-31	0	H1F0
2.58381e-35	-0.660721	0.025	0.408	3.67754e-31	0	DKK3
4.11916e-35	-0.88373	0.016	0.384	5.8628e-31	0	EPAS1
4.84844e-35	-0.582911	0.006	0.366	6.90078e-31	0	CTNND1
5.72464e-35	-0.517213	0.019	0.392	8.14788e-31	0	ITGAV
9.19911e-35	1.05716	0.272	0.064	1.30931e-30	0	TRAF3IP3
9.36489e-35	-0.586258	0.009	0.371	1.33291e-30	0	P4HA2
9.66452e-35	0.720655	0.722	0.804	1.37555e-30	0	SRSF7
1.38312e-34	1.23706	0.38	0.139	1.9686e-30	0	CLEC2D
1.46143e-34	-1.08671	0.019	0.383	2.08006e-30	0	SERPINF1
1.58288e-34	-0.546627	0.054	0.459	2.25292e-30	0	SPTBN1
1.64669e-34	-0.647901	0.003	0.355	2.34373e-30	0	EHD2
1.69941e-34	-0.811787	0.009	0.368	2.41878e-30	0	SRPX
1.71132e-34	-0.509645	0.184	0.729	2.43572e-30	0	MYDGF
1.73599e-34	-1.13824	0.063	0.446	2.47083e-30	0	TAGLN
1.75207e-34	-0.550617	0.025	0.401	2.49372e-30	0	DNTTIP1
2.71859e-34	-0.669885	0.13	0.59	3.86937e-30	0	ID1
2.79645e-34	-0.847414	0.054	0.45	3.98019e-30	0	KRT18
2.83137e-34	1.08851	0.576	0.398	4.02989e-30	0	RAC2
3.27983e-34	-0.6083	0	0.346	4.66818e-30	0	PARVA
3.85784e-34	-0.846547	0	0.346	5.49086e-30	0	PALMD
4.09878e-34	1.01603	0.256	0.056	5.83379e-30	0	LAT
4.16891e-34	-0.536983	0.047	0.443	5.93361e-30	0	HAPLN3
5.33496e-34	-0.612575	0	0.345	7.59325e-30	0	LAMC1
5.37188e-34	-0.888393	0.016	0.375	7.64579e-30	0	CD68
6.81884e-34	-0.660115	0.006	0.357	9.70526e-30	0	NREP
7.64018e-34	-0.50517	0.209	0.765	1.08743e-29	0	GSTO1
7.77601e-34	-0.518447	0.114	0.574	1.10676e-29	0	TUBA1C
8.57377e-34	-0.566995	0.013	0.37	1.22031e-29	0	GAA
8.83917e-34	-0.719907	0.016	0.375	1.25808e-29	0	RNF130
1.25999e-33	-0.526888	0.231	0.808	1.79334e-29	0	RHOC
1.30528e-33	-0.536663	0.006	0.355	1.85781e-29	0	G6PC3
1.37004e-33	-0.611557	0.003	0.348	1.94998e-29	0	TPST1
1.37942e-33	-0.511747	0.022	0.387	1.96332e-29	0	IFNAR1
1.86021e-33	-0.867382	0.009	0.36	2.64764e-29	0	ALDH2
2.9962e-33	-0.57629	0.013	0.365	4.2645e-29	0	TRIM47
3.08779e-33	-0.520187	0.028	0.398	4.39486e-29	0	FAM210B
3.13856e-33	-0.698608	0	0.338	4.46711e-29	0	LTBP1
3.18775e-33	-0.541812	0.022	0.384	4.53713e-29	0	SVIL
3.32737e-33	-0.564168	0.013	0.364	4.73584e-29	0	CCDC88A
3.52915e-33	-0.916242	0.025	0.385	5.02304e-29	0	FBLN1
3.68382e-33	-0.735722	0	0.338	5.24319e-29	0	SLC29A1
4.32316e-33	-0.610666	0	0.337	6.15316e-29	0	GPX8
4.61962e-33	-0.767503	0.006	0.35	6.5751e-29	0	COL12A1
6.11969e-33	-0.635524	0.019	0.376	8.71016e-29	0	SPHK1
6.50716e-33	-0.664592	0.006	0.349	9.26164e-29	0	KDELR3
6.96876e-33	-0.869115	0.006	0.348	9.91863e-29	0	MEF2C
7.44007e-33	-0.735472	0.044	0.424	1.05895e-28	0	IGFBP6
1.06307e-32	-0.800019	0.025	0.385	1.51307e-28	0	SDC1
1.08892e-32	-0.685017	0.003	0.341	1.54987e-28	0	RND3
1.31975e-32	-0.68762	0	0.333	1.8784e-28	0	CD109
1.68198e-32	-0.595556	0.006	0.346	2.39396e-28	0	PROCR
1.68787e-32	0.617772	0.722	0.828	2.40235e-28	0	ANXA1
2.11165e-32	-0.540743	0.028	0.391	3.00551e-28	0	GSTM3
2.12441e-32	-0.598581	0	0.331	3.02367e-28	0	LARP6
2.32776e-32	-0.557288	0.006	0.345	3.3131e-28	0	MDFI
2.74813e-32	-0.554084	0.006	0.344	3.91141e-28	0	CORO1C
2.8349e-32	-0.802899	0.057	0.441	4.03492e-28	0	PMEPA1
3.31631e-32	-0.625966	0.003	0.337	4.72011e-28	0	ALCAM
3.58239e-32	-0.580817	0.006	0.343	5.09881e-28	0	CDC42EP1
3.615e-32	-0.659837	0.006	0.343	5.14523e-28	0	MALL
3.99938e-32	-0.769264	0	0.329	5.69231e-28	0	NFIB
5.15234e-32	-0.819701	0.016	0.36	7.33332e-28	0	TACSTD2
5.16407e-32	-0.618726	0.009	0.348	7.35003e-28	0	WARS
6.48554e-32	-0.69735	0.006	0.341	9.23088e-28	0	VWA1
7.29854e-32	-0.797226	0.013	0.352	1.0388e-27	0	PLAT
7.51125e-32	-0.636325	0	0.327	1.06908e-27	0	CERCAM
8.53257e-32	-0.557876	0.013	0.353	1.21444e-27	0	BMPR2
9.47899e-32	-0.582173	0.006	0.339	1.34914e-27	0	HOXB7
9.69177e-32	-0.547822	0.019	0.366	1.37943e-27	0	MAST4
1.04878e-31	-0.891086	0.022	0.37	1.49273e-27	0	PTN
1.0534e-31	0.580905	0.706	0.762	1.49931e-27	0	FXYD5
1.45436e-31	-0.530168	0.016	0.358	2.06998e-27	0	SHC1
1.81597e-31	-0.56952	0.006	0.337	2.58467e-27	0	TMEM45A
1.9505e-31	-0.603715	0.009	0.343	2.77615e-27	0	FBN1
2.25033e-31	-0.586498	0	0.323	3.2029e-27	0	TMEM54
2.98191e-31	-0.547502	0.003	0.329	4.24416e-27	0	PINK1
3.07484e-31	-0.596199	0	0.322	4.37642e-27	0	TBX3
3.34793e-31	-0.745386	0.019	0.359	4.76511e-27	0	LGMN
4.90578e-31	-0.670746	0	0.32	6.9824e-27	0	RBPMS
5.14518e-31	-0.88608	0.038	0.392	7.32314e-27	0	KRT8
5.64624e-31	-1.11016	0.009	0.337	8.03629e-27	0	TMEM176B
6.53421e-31	-0.594788	0.003	0.326	9.30014e-27	0	JUP
9.56662e-31	1.06818	0.399	0.167	1.36162e-26	0	EVI2B
9.79448e-31	-0.544718	0.006	0.331	1.39405e-26	0	TCEAL1
9.82377e-31	-0.731005	0.006	0.331	1.39822e-26	0	COL8A1
1.04057e-30	-0.509942	0.003	0.324	1.48105e-26	0	NCKAP1
1.37334e-30	-0.519139	0.006	0.33	1.95467e-26	0	ITGB5
1.45172e-30	-0.58642	0	0.316	2.06624e-26	0	BCAR1
2.09545e-30	-0.510842	0.009	0.335	2.98246e-26	0	FAM129B
2.15054e-30	-0.750604	0.019	0.352	3.06087e-26	0	CRYAB
2.34714e-30	-1.06239	0.016	0.342	3.34068e-26	0	COL6A2
2.36736e-30	-0.592759	0.019	0.354	3.36947e-26	0	SWAP70
2.86264e-30	1.1182	0.57	0.419	4.07439e-26	0	CREM
2.95062e-30	0.704499	0.696	0.735	4.19962e-26	0	PNRC1
3.5597e-30	-0.602662	0.003	0.319	5.06652e-26	0	GLT8D2
3.85218e-30	-0.577934	0.019	0.352	5.4828e-26	0	CAMK2N1
5.6417e-30	-0.555754	0.003	0.318	8.02983e-26	0	GNB4
5.67555e-30	-0.582495	0.003	0.318	8.07801e-26	0	MRC2
6.566e-30	-0.539935	0.003	0.317	9.34539e-26	0	GNG12
6.91549e-30	0.913922	0.655	0.607	9.84281e-26	0	TSC22D3
8.9565e-30	-0.576095	0.003	0.316	1.27478e-25	0	ENAH
9.17107e-30	-0.569129	0	0.309	1.30532e-25	0	KANK2
9.225e-30	-0.96701	0.06	0.408	1.31299e-25	0	ACTA2
1.06838e-29	-0.552325	0	0.309	1.52062e-25	0	CDC42BPA
1.1839e-29	-0.531692	0.006	0.322	1.68505e-25	0	PLOD2
1.21235e-29	0.983576	0.43	0.202	1.72553e-25	0	ITM2A
1.2831e-29	-0.855665	0.003	0.314	1.82624e-25	0	ARHGAP29
1.46129e-29	-0.539213	0.013	0.334	2.07985e-25	0	RHOD
1.46471e-29	0.554156	0.706	0.839	2.08473e-25	0	PSME1
1.57112e-29	-0.771534	0.032	0.37	2.23617e-25	0	SERPINE2
1.64145e-29	-0.512395	0.003	0.314	2.33627e-25	0	RP11-382A20.3
1.68757e-29	-0.653061	0	0.307	2.40191e-25	0	FERMT2
1.91643e-29	-0.597114	0.013	0.333	2.72765e-25	0	THBS1
1.96479e-29	-0.622095	0	0.306	2.79648e-25	0	PTK2
2.23867e-29	-0.615782	0.073	0.451	3.18629e-25	0	DUSP6
2.57375e-29	-0.55955	0.316	0.911	3.66322e-25	0	RAC1
2.66125e-29	-0.637988	0.006	0.318	3.78776e-25	0	RAMP1
2.86924e-29	-0.803142	0.013	0.331	4.08379e-25	0	DCBLD2
3.07916e-29	-0.80838	0.006	0.318	4.38257e-25	0	C1orf54
4.82293e-29	-0.857423	0.025	0.355	6.86448e-25	0	SLC14A1
4.97071e-29	0.600269	0.652	0.574	7.07481e-25	0	CD44
4.99607e-29	-0.68627	0.019	0.342	7.11091e-25	0	ADM
5.1524e-29	-0.594131	0.006	0.316	7.33341e-25	0	GPRC5C
5.49515e-29	-0.851702	0.009	0.322	7.82125e-25	0	MAFB
5.55752e-29	-0.526941	0.003	0.309	7.91001e-25	0	LRP1
7.47227e-29	-0.58762	0.003	0.308	1.06353e-24	0	DPYSL2
7.67393e-29	-0.800168	0	0.301	1.09223e-24	0	CFI
8.347e-29	-0.555785	0.006	0.314	1.18803e-24	0	FAM198B
1.37068e-28	-0.520428	0.003	0.306	1.95089e-24	0	GPC1
1.39413e-28	-0.53625	0.025	0.351	1.98427e-24	0	LXN
1.40334e-28	-0.844634	0.009	0.318	1.99737e-24	0	CLDN4
1.52175e-28	-0.639787	0.006	0.312	2.1659e-24	0	FAP
1.56021e-28	-0.632357	0.003	0.305	2.22065e-24	0	MPZL2
1.58742e-28	-0.504481	0.051	0.404	2.25938e-24	0	HRAS
1.8917e-28	-0.606972	0.101	0.493	2.69245e-24	0	TNFRSF12A
1.96357e-28	-1.06903	0.013	0.321	2.79476e-24	0	C1S
2.01571e-28	-0.525575	0.006	0.311	2.86896e-24	0	SNAI2
2.42706e-28	-0.542364	0.013	0.323	3.45443e-24	0	TMEM98
2.48647e-28	-0.543127	0.003	0.304	3.539e-24	0	EDNRA
2.55143e-28	-0.525449	0	0.297	3.63146e-24	0	PTK7
2.55143e-28	-0.525982	0	0.297	3.63146e-24	0	OSBPL1A
3.25538e-28	-1.0939	0.022	0.332	4.63339e-24	0	BGN
3.25554e-28	-0.519196	0.019	0.335	4.63362e-24	0	ABL2
5.65784e-28	-0.809755	0.003	0.3	8.0528e-24	0	COL6A3
5.8822e-28	-0.637669	0.006	0.307	8.37213e-24	0	PLEK2
6.24511e-28	-0.558231	0	0.293	8.88867e-24	0	LOXL2
7.99148e-28	-0.575093	0.044	0.384	1.13743e-23	0	ITGA6
8.67663e-28	-0.703732	0.013	0.318	1.23494e-23	0	LMCD1
9.49855e-28	-0.53277	0.003	0.298	1.35193e-23	0	SIRPA
1.06144e-27	-0.510938	0.006	0.305	1.51075e-23	0	VAT1
1.12468e-27	-0.926696	0.06	0.39	1.60076e-23	0	LUM
1.13108e-27	-0.660324	0	0.291	1.60987e-23	0	KCTD12
1.17796e-27	-0.517508	0.019	0.331	1.67659e-23	0	SPINT1
1.4775e-27	-0.574404	0.003	0.297	2.10292e-23	0	KCNJ15
1.48068e-27	-0.874003	0.019	0.326	2.10745e-23	0	THY1
2.32924e-27	-0.529213	0.003	0.295	3.3152e-23	0	TPD52L1
2.43768e-27	1.13906	0.345	0.138	3.46955e-23	0	RORA
2.51255e-27	-0.667123	0.006	0.301	3.57611e-23	0	COL5A2
2.53778e-27	-0.639865	0.019	0.326	3.61203e-23	0	HBEGF
2.74545e-27	-0.501482	0	0.288	3.9076e-23	0	BHLHE41
3.50879e-27	-0.585454	0.006	0.3	4.99407e-23	0	LAPTM4B
3.59296e-27	-0.718683	0.003	0.293	5.11386e-23	0	LAMB3
4.50215e-27	-0.756712	0.009	0.305	6.40791e-23	0	COL18A1
4.70068e-27	-0.618656	0.022	0.331	6.69047e-23	0	ITGB4
5.40344e-27	-0.744438	0.025	0.337	7.69071e-23	0	NT5E
6.6308e-27	-0.812041	0	0.284	9.43761e-23	0	FILIP1L
7.15716e-27	-0.73783	0.111	0.467	1.01868e-22	0	KRT19
7.56438e-27	-0.554575	0.003	0.291	1.07664e-22	0	SSPN
8.79602e-27	-0.595929	0.013	0.31	1.25194e-22	0	ITGA2
8.80851e-27	-0.539085	0.013	0.31	1.25372e-22	0	CSTA
8.9798e-27	-0.615995	0.032	0.348	1.27809e-22	0	SDC4
9.72947e-27	-0.566233	0.013	0.309	1.3848e-22	0	EFEMP1
1.10079e-26	-0.804431	0.019	0.32	1.56675e-22	0	C8orf4
1.37736e-26	-0.507998	0	0.281	1.9604e-22	0	DPYSL3
1.59269e-26	-0.541754	0.032	0.346	2.26688e-22	0	PLPP1
1.81476e-26	-0.560833	0.003	0.287	2.58294e-22	0	DSP
2.08705e-26	-0.55969	0.003	0.287	2.97049e-22	0	SPOCK1
2.20474e-26	-0.6751	0.006	0.293	3.13801e-22	0	NR2F2
2.64705e-26	-0.564565	0.006	0.292	3.76754e-22	0	LOXL1
3.25119e-26	-0.521303	0.003	0.285	4.62742e-22	0	STRA6
4.07368e-26	-0.504692	0.006	0.291	5.79807e-22	0	GNS
4.2695e-26	-0.901855	0.003	0.283	6.07677e-22	0	TMEM176A
5.09065e-26	-0.515262	0	0.276	7.24552e-22	0	UBE2E2
5.67211e-26	-0.789322	0.038	0.346	8.07312e-22	0	NPDC1
5.88245e-26	-0.501082	0	0.276	8.37249e-22	0	LPCAT2
5.88245e-26	-0.979715	0	0.276	8.37249e-22	0	BCAM
5.89287e-26	-0.686462	0.025	0.328	8.38732e-22	0	CAPS
6.15273e-26	-0.536137	0.009	0.296	8.75718e-22	0	MLPH
6.49936e-26	-0.59993	0.006	0.289	9.25054e-22	0	SCG5
8.91079e-26	-0.537416	0.003	0.281	1.26827e-21	0	PLBD1
1.18078e-25	0.51229	0.696	0.856	1.68061e-21	0	SOD1
1.58229e-25	-0.510862	0.003	0.279	2.25208e-21	0	SERTAD4-AS1
2.14773e-25	-0.562259	0	0.271	3.05687e-21	0	PLXDC2
2.9444e-25	-0.653325	0.016	0.302	4.19077e-21	0	COL7A1
3.29915e-25	-0.521517	0	0.269	4.69567e-21	0	ANTXR1
3.39467e-25	-0.57085	0.006	0.282	4.83163e-21	0	LAMA4
3.70173e-25	-0.59414	0.104	0.472	5.26867e-21	0	SPINT2
4.29197e-25	-0.531916	0.003	0.275	6.10877e-21	0	FBLIM1
5.16156e-25	-0.653714	0.028	0.326	7.34645e-21	0	ITGA3
5.56246e-25	-0.740571	0.003	0.273	7.91705e-21	0	RCAN1
8.37825e-25	-0.761976	0.006	0.278	1.19248e-20	0	TSPAN7
9.28992e-25	-0.611529	0.025	0.317	1.32223e-20	0	SERPINE1
1.03031e-24	-0.501852	0	0.264	1.46645e-20	0	ZFHX3
1.38357e-24	-0.610515	0.019	0.303	1.96923e-20	0	C19orf33
1.84699e-24	-0.502986	0.358	0.778	2.62882e-20	0	FN1
2.23213e-24	-0.635982	0.117	0.478	3.17699e-20	0	PERP
2.30607e-24	-0.750028	0.022	0.306	3.28223e-20	0	KRT5
2.5101e-24	-0.678389	0.013	0.286	3.57262e-20	0	ANGPTL4
2.93008e-24	-0.746631	0.035	0.33	4.17039e-20	0	SFN
3.58011e-24	-0.684034	0.003	0.266	5.09557e-20	0	NDRG2
4.60721e-24	-1.02453	0.028	0.309	6.55744e-20	0	RNASE1
4.9907e-24	-0.726735	0.016	0.289	7.10326e-20	0	G0S2
5.15907e-24	-0.684031	0.009	0.277	7.34291e-20	0	FKBP10
5.22383e-24	-0.539005	0.006	0.271	7.43508e-20	0	ZNF503
6.10678e-24	-0.562752	0.016	0.289	8.69178e-20	0	ADAM15
7.40621e-24	-0.587293	0	0.256	1.05413e-19	0	MSRB3
8.39051e-24	0.647287	0.677	0.806	1.19422e-19	0	HSPD1
8.85881e-24	-0.667386	0.009	0.275	1.26087e-19	0	DHRS2
9.7962e-24	-0.669267	0	0.255	1.39429e-19	0	HMGA2
1.03045e-23	-0.580329	0.016	0.288	1.46664e-19	0	IGF2
1.11139e-23	-0.574775	0.003	0.262	1.58185e-19	0	TNC
1.13045e-23	0.830529	0.415	0.206	1.60897e-19	0	ITGB2
1.1936e-23	-0.98952	0.028	0.303	1.69885e-19	0	COL3A1
1.29113e-23	-0.703365	0.006	0.267	1.83766e-19	0	CPVL
1.31105e-23	-0.620145	0.009	0.274	1.86602e-19	0	SLPI
1.51363e-23	-0.764623	0.022	0.296	2.15436e-19	0	CXCL14
2.25986e-23	-0.512805	0	0.252	3.21646e-19	0	LAMB2
2.25986e-23	-0.633173	0	0.252	3.21646e-19	0	ID4
3.54362e-23	-1.00657	0.013	0.275	5.04363e-19	0	AQP1
3.80253e-23	-0.587868	0.016	0.283	5.41214e-19	0	GJB2
4.03528e-23	0.977833	0.541	0.45	5.74341e-19	0	STK17A
5.76624e-23	-0.800491	0.016	0.28	8.20709e-19	0	IGFBP2
6.37886e-23	-0.655332	0.022	0.293	9.07903e-19	0	TFPI2
9.60196e-23	-0.670888	0.006	0.259	1.36665e-18	0	EFEMP2
1.08307e-22	0.91772	0.253	0.082	1.54153e-18	0	GPR65
1.2169e-22	1.08035	0.411	0.229	1.73201e-18	0	LIMD2
2.07454e-22	-0.712027	0.009	0.262	2.9527e-18	0	PDLIM3
2.60499e-22	-0.531411	0.006	0.255	3.70768e-18	0	SIGLEC15
2.7555e-22	-0.856034	0.019	0.276	3.92191e-18	0	PCOLCE
3.4871e-22	-0.593185	0.013	0.267	4.96319e-18	0	FAM26F
5.66756e-22	-0.78136	0.013	0.263	8.06664e-18	0	C11orf96
8.11077e-22	-0.653159	0.13	0.454	1.15441e-17	0	KRT17
1.1014e-21	1.10229	0.468	0.316	1.56762e-17	0	STK4
2.68582e-21	-0.80005	0.009	0.252	3.82273e-17	0	AEBP1
3.49303e-21	1.04793	0.285	0.113	4.97163e-17	0	PTGER4
4.144e-21	-0.856938	0.019	0.267	5.89815e-17	0	PECAM1
5.01889e-21	-0.707391	0.032	0.291	7.14339e-17	0	TNFRSF11B
5.65574e-21	-0.681068	0.016	0.262	8.04981e-17	0	CLEC11A
9.15627e-21	-0.851364	0.025	0.273	1.30321e-16	0	POSTN
2.26014e-20	-1.00655	0.032	0.274	3.21685e-16	0	DCN
4.01132e-20	-0.563895	0.123	0.436	5.70931e-16	0	KRT7
4.24796e-20	-0.601353	0.063	0.34	6.04612e-16	0	LAMC2
5.25882e-20	-0.788059	0.06	0.323	7.48487e-16	0	APOE
9.45162e-20	-0.543925	0.041	0.298	1.34525e-15	0	LY96
1.18364e-19	0.716824	0.627	0.683	1.68468e-15	0	HSPH1
1.95996e-19	-0.806036	0.044	0.291	2.78961e-15	0	SPRY1
2.49593e-19	-0.683118	0.025	0.261	3.55245e-15	0	IGFBP3
6.27812e-19	0.912191	0.446	0.305	8.93565e-15	0	GPSM3
6.50293e-19	-0.553729	0.025	0.258	9.25562e-15	0	C15orf48
7.93082e-19	0.893874	0.259	0.102	1.12879e-14	0	ARHGAP15
8.00318e-19	0.776462	0.557	0.505	1.13909e-14	0	GMFG
1.03854e-18	0.716568	0.614	0.659	1.47815e-14	0	ID2
2.23295e-18	1.03157	0.522	0.468	3.17815e-14	0	LEPROTL1
2.34499e-18	-0.580627	0.025	0.252	3.33763e-14	0	APOD
1.07811e-17	0.857221	0.547	0.517	1.53447e-13	0	IRF1
2.10876e-17	0.961769	0.396	0.24	3.00139e-13	0	ZNF331
3.7532e-17	1.11814	0.443	0.334	5.34193e-13	0	TUBA4A
3.79053e-17	1.07102	0.437	0.314	5.39506e-13	0	ISG20
1.34449e-16	0.754079	0.563	0.539	1.91361e-12	0	BTG2
1.96795e-15	0.774118	0.589	0.662	2.80099e-11	0	HSPA1B
2.62202e-15	0.956738	0.256	0.116	3.73192e-11	0	SEPT1
4.05589e-15	-0.545134	0.057	0.275	5.77275e-11	0	HLA-DMB
1.45311e-14	0.672171	0.437	0.265	2.06821e-10	0	ALOX5AP
2.29963e-14	0.773054	0.358	0.216	3.27306e-10	0	GIMAP7
4.66766e-14	0.779598	0.547	0.577	6.64348e-10	0	CLK1
1.7228e-13	0.944589	0.348	0.222	2.45207e-09	0	TSPYL2
1.80142e-13	0.850558	0.516	0.507	2.56396e-09	0	ELF1
2.4159e-13	0.984418	0.364	0.248	3.43855e-09	0	WIPF1
4.75993e-13	0.851337	0.44	0.355	6.77481e-09	0	LCP1
4.89916e-13	1.03078	0.37	0.258	6.97297e-09	0	ICAM3
7.61248e-13	1.00035	0.329	0.207	1.08348e-08	0	CDC42SE2
8.72013e-13	0.622923	0.57	0.616	1.24114e-08	0	COTL1
1.10831e-12	0.720952	0.532	0.503	1.57745e-08	0	RGS2
4.57431e-12	-0.637462	0.073	0.252	6.51061e-08	0	FCER1G
5.70283e-12	0.784689	0.481	0.456	8.11684e-08	0	HMGB2
5.86097e-12	0.568614	0.598	0.762	8.34191e-08	0	SRSF5
6.34559e-12	0.899135	0.291	0.17	9.03168e-08	0	RP11-138A9.1
9.12747e-12	1.01038	0.37	0.27	1.29911e-07	0	STK17B
3.6171e-11	1.02614	0.389	0.311	5.14821e-07	0	PPP2R5C
6.0963e-11	0.688478	0.535	0.599	8.67686e-07	0	CLEC2B
3.54913e-10	0.763203	0.297	0.19	5.05148e-06	0	HCLS1
3.52119e-09	0.518252	0.579	0.783	5.01171e-05	0	FUS
6.14394e-09	0.811415	0.497	0.556	8.74466e-05	0	YPEL5
9.62693e-09	0.927395	0.43	0.417	0.00013702	0	IDS
1.68248e-08	0.615994	0.465	0.445	0.000239467	0	NR4A2
3.27096e-08	0.726662	0.307	0.223	0.000465556	0	GIMAP4
5.1839e-08	0.528865	0.551	0.728	0.000737825	0	CYCS
5.87986e-08	0.873101	0.301	0.22	0.00083688	0	TNFAIP8
1.0053e-07	0.917301	0.285	0.204	0.00143084	0	FYN
3.67725e-07	0.939417	0.361	0.321	0.00523383	0	DEDD2
7.94207e-07	0.927851	0.405	0.384	0.011304	0	HSPA6
1.08485e-06	0.870764	0.37	0.35	0.0154406	0	APOBEC3G
2.12673e-06	0.770079	0.405	0.398	0.0302698	0	REL
5.7434e-280	1.35952	0.977	0.086	8.17458e-276	1	HMGA2
6.26523e-256	1.23164	0.931	0.086	8.91731e-252	1	LINC00973
2.08786e-243	1.18626	0.908	0.085	2.97166e-239	1	SLITRK6
5.08114e-240	1.34734	0.914	0.095	7.23198e-236	1	CRLF1
4.33407e-228	0.944101	0.868	0.079	6.16869e-224	1	PPP1R14C
4.67005e-221	1.05697	0.927	0.096	6.64688e-217	1	SIGLEC15
1.25012e-220	1.09568	0.924	0.106	1.7793e-216	1	PKP3
6.71597e-214	1.02565	0.888	0.096	9.55883e-210	1	SERPINB5
2.3611e-213	1.43249	0.993	0.187	3.36055e-209	1	SLC14A1
3.3658e-211	1.0856	0.95	0.134	4.79055e-207	1	KCNN4
4.06838e-206	0.905198	0.716	0.05	5.79052e-202	1	ERICH3
1.91657e-205	1.18301	0.944	0.13	2.72785e-201	1	LAMB3
5.83817e-205	1.27331	0.967	0.164	8.30947e-201	1	ITGA3
1.91023e-204	1.25721	0.937	0.143	2.71883e-200	1	COL7A1
4.03227e-203	1.38344	0.944	0.147	5.73913e-199	1	KRT5
7.84341e-195	1.2344	0.974	0.173	1.11635e-190	1	NT5E
2.0812e-194	1.26411	0.95	0.169	2.96218e-190	1	DCBLD2
5.87887e-194	0.868445	0.766	0.073	8.36739e-190	1	TNNT1
1.68191e-193	0.954505	0.898	0.124	2.39386e-189	1	EVA1A
5.04269e-193	1.3683	0.983	0.181	7.17726e-189	1	LAMC2
5.34092e-193	1.28815	0.98	0.166	7.60173e-189	1	SFN
9.16416e-193	1.25538	0.964	0.165	1.30433e-188	1	CAPS
8.30122e-192	0.746349	0.71	0.055	1.18151e-187	1	RP11-277P12.20
9.05231e-192	0.78285	0.769	0.075	1.28842e-187	1	PTPRU
1.74349e-191	0.926509	0.822	0.098	2.48151e-187	1	CRTC1
2.57531e-190	0.970219	0.878	0.116	3.66544e-186	1	PAX8
6.10236e-190	0.9675	0.917	0.138	8.68549e-186	1	MLPH
8.88076e-187	0.770479	0.785	0.083	1.264e-182	1	STX1A
9.5802e-187	1.09124	0.927	0.151	1.36355e-182	1	ITGA2
1.2238e-186	0.944687	0.904	0.113	1.74184e-182	1	FERMT1
9.7877e-186	1.35323	0.904	0.14	1.39308e-181	1	TNFRSF11B
9.66274e-185	0.904696	0.795	0.086	1.3753e-180	1	COL17A1
4.2309e-184	0.622603	0.644	0.041	6.02184e-180	1	SHC4
5.86263e-184	0.959965	0.911	0.139	8.34428e-180	1	KCNJ15
2.66521e-183	0.891766	0.884	0.125	3.79339e-179	1	CDCP1
7.5273e-181	0.83749	0.769	0.081	1.07136e-176	1	CSPG4
1.65442e-178	0.868863	0.805	0.098	2.35474e-174	1	GPR87
5.6317e-178	1.18767	0.776	0.095	8.01561e-174	1	DAPL1
8.31445e-178	1.25125	0.997	0.277	1.1834e-173	1	PMEPA1
6.38622e-176	0.906167	0.772	0.085	9.08951e-172	1	EREG
1.97863e-175	0.931201	0.888	0.133	2.81618e-171	1	SPOCK1
6.62111e-175	0.963574	0.884	0.134	9.42383e-171	1	DSP
9.52486e-173	0.851665	0.848	0.12	1.35567e-168	1	AHNAK2
4.11082e-171	1.09545	0.71	0.071	5.85092e-167	1	CST4
1.99501e-170	0.668899	0.634	0.05	2.8395e-166	1	RP5-907D15.4
4.32666e-170	0.603183	0.597	0.04	6.15814e-166	1	MCF2
4.71056e-170	0.831344	0.855	0.121	6.70454e-166	1	EPS8L2
1.37956e-169	0.800927	0.851	0.115	1.96353e-165	1	ULBP2
7.83709e-169	1.03716	0.96	0.153	1.11545e-164	1	CLDN4
1.19867e-168	0.931907	0.805	0.108	1.70607e-164	1	LYPD3
2.2271e-168	0.762228	0.723	0.077	3.16983e-164	1	SOX9
3.41962e-168	1.07785	0.97	0.186	4.86714e-164	1	SDC4
3.60514e-168	1.01989	0.828	0.108	5.13119e-164	1	LAMA3
1.30449e-167	1.17593	0.99	0.202	1.85668e-163	1	PTN
3.05794e-167	0.958039	0.911	0.15	4.35236e-163	1	PLEK2
1.40077e-166	1.02235	0.848	0.128	1.99372e-162	1	TSPAN1
1.65122e-166	1.17017	0.891	0.143	2.35018e-162	1	TFPI2
4.48854e-165	1.04966	0.993	0.278	6.38853e-161	1	PDLIM4
3.14543e-164	1.09979	0.993	0.236	4.47689e-160	1	SERINC2
1.50361e-163	0.684723	0.716	0.078	2.14009e-159	1	TNS4
2.40002e-163	1.00285	0.914	0.148	3.41594e-159	1	C19orf33
2.02453e-161	0.664987	0.69	0.071	2.88151e-157	1	SEC14L2
8.52732e-161	1.1545	1	0.225	1.21369e-156	1	KRT8
1.85192e-160	1.03789	0.911	0.163	2.63584e-156	1	SERPINE1
1.87339e-159	0.733351	0.736	0.085	2.6664e-155	1	MFI2
4.74049e-159	0.766212	0.828	0.119	6.74714e-155	1	CDH13
1.56448e-158	0.819927	0.696	0.072	2.22673e-154	1	WNT7A
1.36149e-156	1.18445	0.937	0.213	1.93781e-152	1	SERPINE2
1.10991e-155	1.01236	0.653	0.064	1.57973e-151	1	AMTN
2.05002e-155	1.17885	0.99	0.267	2.91779e-151	1	SERPINA1
1.3422e-154	0.988455	0.98	0.242	1.91035e-150	1	HRAS
1.87034e-154	0.637357	0.776	0.106	2.66205e-150	1	BCAS4
2.70598e-154	0.555642	0.594	0.05	3.85142e-150	1	ALG1L
3.69583e-154	0.657197	0.69	0.08	5.26027e-150	1	RNF128
1.59839e-153	0.907144	0.904	0.176	2.27499e-149	1	CD109
1.60234e-153	1.14351	1	0.324	2.28061e-149	1	PERP
2.34525e-153	0.559697	0.578	0.045	3.33799e-149	1	HSD17B1
3.40843e-153	0.908478	0.881	0.165	4.85121e-149	1	MRC2
3.45456e-151	0.926544	0.931	0.194	4.91687e-147	1	CAMK2N1
6.64754e-151	0.698251	0.723	0.087	9.46144e-147	1	LAD1
2.85378e-149	0.752994	0.584	0.05	4.06178e-145	1	MIA
3.28933e-149	1.22407	1	0.303	4.6817e-145	1	KRT17
7.2344e-149	0.638167	0.696	0.084	1.02967e-144	1	IRF6
1.90398e-147	0.590174	0.66	0.071	2.70994e-143	1	MAMDC2
4.55857e-146	0.685746	0.766	0.113	6.48821e-142	1	IGF2BP2
4.87656e-146	0.812828	0.838	0.146	6.94081e-142	1	AGRN
6.24428e-146	0.775265	0.868	0.156	8.88748e-142	1	GPC1
1.14337e-145	1.01759	0.977	0.284	1.62736e-141	1	SLC20A1
5.6918e-145	0.606368	0.637	0.067	8.10113e-141	1	SYNDIG1
1.215e-144	0.53968	0.663	0.073	1.7293e-140	1	TOX2
4.25014e-144	0.723451	0.835	0.141	6.04922e-140	1	PPP1R13L
5.09187e-144	0.816815	0.878	0.157	7.24725e-140	1	SLC2A1
1.28494e-143	0.747388	0.898	0.161	1.82885e-139	1	GPRC5C
1.54384e-143	0.836772	0.733	0.103	2.19735e-139	1	ITGB6
1.84983e-142	0.681473	0.729	0.1	2.63286e-138	1	VEGFC
3.19449e-142	0.587138	0.587	0.057	4.54672e-138	1	DSC3
3.81056e-142	0.834282	0.818	0.143	5.42357e-138	1	STRA6
5.01433e-142	0.64155	0.65	0.074	7.13689e-138	1	COL9A2
4.08536e-141	0.943535	0.983	0.279	5.81469e-137	1	CD58
1.03066e-140	0.641772	0.851	0.143	1.46694e-136	1	SYTL1
5.72751e-140	0.547883	0.7	0.087	8.15196e-136	1	DDR1
6.42491e-140	0.849472	0.799	0.124	9.14458e-136	1	TNC
7.15528e-140	0.827226	0.838	0.156	1.01841e-135	1	SLC26A2
7.60748e-140	1.01303	0.957	0.239	1.08277e-135	1	CCND1
1.36767e-139	0.754616	0.838	0.131	1.94661e-135	1	DHRS2
8.9812e-139	0.671043	0.822	0.139	1.27829e-134	1	PYGB
1.48115e-138	0.752514	0.832	0.147	2.10812e-134	1	KIZ
2.92247e-138	0.843995	0.894	0.179	4.15955e-134	1	SPINT1
3.89661e-138	1.20103	0.993	0.314	5.54604e-134	1	KRT19
1.62766e-137	0.72372	0.901	0.175	2.31665e-133	1	LARP6
1.74169e-137	0.576941	0.614	0.067	2.47895e-133	1	ANXA8L1
1.76113e-137	0.602171	0.7	0.093	2.50662e-133	1	PLXNA1
8.46647e-137	0.722195	0.551	0.048	1.20503e-132	1	S100A1
2.09612e-136	0.905262	0.894	0.18	2.98341e-132	1	ITGB4
4.14579e-136	0.790347	0.884	0.183	5.9007e-132	1	RHOD
9.29621e-136	0.597084	0.759	0.113	1.32313e-131	1	SEL1L3
1.62922e-135	0.675671	0.743	0.111	2.31888e-131	1	SEMA4B
7.72479e-135	0.632306	0.627	0.069	1.09947e-130	1	MYEOV
7.90573e-135	1.05914	0.802	0.149	1.12522e-130	1	ANGPTL4
2.14718e-134	0.516582	0.578	0.056	3.05609e-130	1	CD163L1
5.37606e-134	0.831378	0.947	0.238	7.65175e-130	1	FAM210B
7.34821e-134	0.632847	0.726	0.106	1.04587e-129	1	LRIG3
2.43155e-131	0.978043	0.98	0.293	3.46083e-127	1	DUSP6
2.64367e-131	1.04036	0.993	0.338	3.76274e-127	1	TNFRSF12A
3.43866e-131	0.804503	0.908	0.203	4.89425e-127	1	ABHD2
5.79387e-131	0.534298	0.587	0.064	8.24642e-127	1	TRIM29
7.94341e-131	0.940963	0.974	0.221	1.13059e-126	1	SDC1
8.72698e-131	0.98347	0.838	0.168	1.24211e-126	1	CLIC3
8.90104e-131	0.74944	0.746	0.12	1.26689e-126	1	SLC38A5
1.15885e-130	0.787799	0.756	0.124	1.64939e-126	1	SEMA3C
1.47898e-130	0.619428	0.611	0.071	2.10504e-126	1	GJB3
2.92659e-130	0.87292	1	0.665	4.16542e-126	1	FN1
1.85611e-129	0.759096	0.871	0.175	2.64181e-125	1	JUP
2.43233e-129	0.79358	0.696	0.105	3.46193e-125	1	PORCN
5.40127e-129	0.572394	0.558	0.055	7.68762e-125	1	C6orf141
5.62498e-129	0.545585	0.624	0.073	8.00603e-125	1	FAM83A
6.47289e-129	0.593445	0.624	0.077	9.21287e-125	1	CDH2
6.62934e-129	0.571461	0.554	0.054	9.43554e-125	1	AC003092.1
3.54748e-128	0.56208	0.554	0.055	5.04913e-124	1	LINC00704
5.18956e-128	0.911258	0.997	0.513	7.38631e-124	1	S100A13
1.04457e-126	0.859522	1	0.762	1.48673e-122	1	S100A2
4.15716e-126	-0.520033	1	0.996	5.91689e-122	1	RPS2
6.15597e-126	0.521888	0.578	0.064	8.7618e-122	1	ST6GALNAC2
1.35086e-125	0.504915	0.545	0.051	1.92268e-121	1	AIM2
1.46177e-125	-0.634996	1	0.995	2.08054e-121	1	RPS6
1.93826e-125	0.793927	0.931	0.228	2.75873e-121	1	TUSC3
3.2823e-124	0.695509	0.825	0.156	4.6717e-120	1	GALE
4.94588e-124	0.517882	0.535	0.053	7.03947e-120	1	PFKFB4
5.1924e-124	0.588349	0.706	0.108	7.39035e-120	1	PTPRF
1.05037e-123	-0.536131	0.997	0.993	1.49499e-119	1	RPS23
1.08302e-123	0.908252	0.99	0.407	1.54146e-119	1	FAM3C
4.97203e-123	0.530627	0.617	0.079	7.0767e-119	1	STEAP3
6.40806e-123	0.760133	0.802	0.157	9.1206e-119	1	CDK6
3.03219e-122	0.644923	0.894	0.185	4.31572e-118	1	HOXB7
4.96589e-122	0.601219	0.66	0.094	7.06796e-118	1	DSC2
9.44041e-122	0.503611	0.564	0.063	1.34365e-117	1	RTTN
4.62102e-121	0.721119	0.64	0.09	6.5771e-117	1	PTHLH
5.78384e-121	0.943083	0.98	0.291	8.23215e-117	1	HMGA1
6.88647e-121	1.085	0.977	0.288	9.80152e-117	1	KRT7
8.78218e-121	0.575071	0.66	0.095	1.24997e-116	1	GPC4
1.08935e-120	0.52033	0.667	0.097	1.55047e-116	1	SLC35F2
2.94947e-120	0.62531	0.69	0.11	4.19798e-116	1	BCAR3
4.81924e-120	0.512643	0.587	0.073	6.85923e-116	1	RP11-357H14.17
5.43506e-120	0.887994	0.617	0.086	7.73573e-116	1	ENPP1
7.41225e-120	0.578441	0.749	0.129	1.05499e-115	1	HOXB6
8.08415e-120	0.591119	0.802	0.151	1.15062e-115	1	AC093673.5
8.74448e-119	0.889611	0.96	0.264	1.2446e-114	1	IGFBP6
3.06499e-118	0.840608	0.686	0.116	4.3624e-114	1	PTGES
9.66166e-118	0.606339	0.805	0.153	1.37514e-113	1	ARL4D
1.03987e-117	0.756727	0.805	0.17	1.48005e-113	1	GCLM
1.72258e-117	-0.511155	1	0.999	2.45175e-113	1	RPL13
4.77506e-117	0.789691	0.772	0.142	6.79634e-113	1	SLPI
7.05354e-117	0.692948	0.795	0.161	1.00393e-112	1	DCBLD1
1.84209e-116	0.859549	0.865	0.201	2.62184e-112	1	COL12A1
2.23804e-116	0.880006	0.997	0.343	3.18541e-112	1	FSCN1
2.54516e-116	0.967855	0.993	0.286	3.62252e-112	1	KRT18
4.56274e-116	0.60905	0.65	0.095	6.49415e-112	1	BIK
1.70248e-115	0.913079	0.997	0.317	2.42314e-111	1	SPINT2
2.80651e-115	0.622781	0.706	0.119	3.9945e-111	1	DSG2
2.82636e-115	-0.524264	0.997	0.994	4.02276e-111	1	RPS24
9.68402e-115	0.575317	0.713	0.122	1.37833e-110	1	DFNA5
1.83947e-114	0.615216	0.878	0.198	2.61812e-110	1	NDFIP2
3.09614e-114	0.55783	0.663	0.103	4.40674e-110	1	CNIH3
1.17135e-113	0.624851	0.772	0.145	1.66719e-109	1	SERTAD4-AS1
1.59904e-113	0.514143	0.535	0.062	2.27591e-109	1	TGFA
2.14452e-113	0.509735	0.564	0.071	3.05229e-109	1	LINC00958
5.79788e-113	-0.506186	1	0.994	8.25212e-109	1	RPS3A
2.72788e-112	0.998056	0.954	0.33	3.8826e-108	1	MT1X
5.06532e-112	0.528083	0.69	0.113	7.20947e-108	1	BAIAP2L1
7.43272e-112	0.583873	0.64	0.096	1.0579e-107	1	SEMA7A
1.15227e-111	0.661334	0.845	0.179	1.64003e-107	1	LSR
3.86331e-111	0.555587	0.366	0.017	5.49865e-107	1	RP11-95P13.1
3.93248e-111	0.766934	0.98	0.293	5.5971e-107	1	TMX4
4.41402e-111	0.685739	0.686	0.111	6.28248e-107	1	AGR2
9.70352e-111	0.924478	0.957	0.315	1.3811e-106	1	TGM2
1.5288e-110	0.534023	0.716	0.123	2.17594e-106	1	MET
3.3849e-110	0.740813	0.868	0.199	4.81772e-106	1	KDELR3
7.95552e-110	0.541639	0.624	0.092	1.13231e-105	1	CITED4
1.07698e-109	0.528869	0.644	0.102	1.53286e-105	1	LTBP2
3.6505e-109	0.584117	0.782	0.156	5.19576e-105	1	FEZ1
5.45486e-109	0.521628	0.528	0.063	7.7639e-105	1	TMEM132A
8.15105e-109	0.655299	0.838	0.191	1.16014e-104	1	FAM129B
1.26263e-108	-0.500754	1	0.993	1.7971e-104	1	RPS13
2.01637e-108	0.543202	0.518	0.062	2.8699e-104	1	CDH3
3.82983e-108	0.829714	1	0.477	5.451e-104	1	S100A16
5.48367e-108	0.639173	0.838	0.185	7.80491e-104	1	ITGB5
5.90428e-108	0.517381	0.762	0.145	8.40356e-104	1	CRNDE
6.71732e-108	0.601842	0.832	0.175	9.56077e-104	1	RAMP1
1.45388e-107	0.509493	0.716	0.126	2.0693e-103	1	FZD6
7.59236e-107	-0.536098	1	0.992	1.08062e-102	1	RPL30
1.29009e-106	0.668668	0.492	0.052	1.83619e-102	1	KRT14
1.35638e-106	0.674576	0.815	0.181	1.93054e-102	1	PLOD2
4.66101e-106	0.792288	0.954	0.288	6.63402e-102	1	FHL2
1.18233e-105	0.500773	0.693	0.121	1.68281e-101	1	FOXC1
1.35581e-105	0.56569	0.696	0.121	1.92973e-101	1	EPHA2
1.79217e-105	0.814838	0.993	0.485	2.5508e-101	1	TXNDC17
1.18217e-104	0.743624	0.921	0.257	1.68258e-100	1	PLOD1
1.58244e-104	-0.535091	1	0.997	2.25228e-100	1	RPL34
4.48968e-104	0.502686	0.723	0.139	6.39016e-100	1	PRKCA
4.93792e-104	0.546438	0.809	0.17	7.02815e-100	1	ADGRG1
5.38e-104	0.689403	0.7	0.126	7.65735e-100	1	EPCAM
1.5172e-103	0.807456	0.746	0.16	2.15944e-99	1	SCG5
3.10024e-103	-0.531581	1	0.996	4.41257e-99	1	RPS27
9.78453e-103	0.600354	0.785	0.164	1.39263e-98	1	PDGFC
1.55162e-102	0.692552	0.927	0.251	2.20842e-98	1	PHLDA3
1.57913e-102	-0.509052	1	0.991	2.24758e-98	1	RPS25
1.83132e-102	0.657541	0.911	0.238	2.60652e-98	1	A4GALT
2.134e-102	0.623079	0.762	0.16	3.03733e-98	1	RASSF7
2.89521e-102	0.850264	0.993	0.407	4.12075e-98	1	MFGE8
6.15021e-102	0.552881	0.723	0.144	8.75359e-98	1	PSD3
7.55073e-102	0.680967	0.881	0.209	1.0747e-97	1	TACSTD2
7.85662e-102	-0.515862	1	0.989	1.11823e-97	1	RPS15A
3.77929e-101	0.560982	0.782	0.17	5.37907e-97	1	RGS12
4.18042e-101	0.52135	0.733	0.143	5.94999e-97	1	HOMER3
1.84396e-100	0.501172	0.564	0.082	2.62451e-96	1	HOXD1
2.11501e-100	0.518127	0.759	0.156	3.0103e-96	1	LRRC8A
2.4299e-100	0.664181	0.861	0.208	3.45848e-96	1	NREP
3.40493e-100	0.67168	0.901	0.244	4.84624e-96	1	CD276
1.25121e-99	0.574164	0.399	0.033	1.78085e-95	1	CLCA2
7.51563e-99	0.705785	0.927	0.285	1.0697e-94	1	HEBP2
1.50624e-98	-0.53491	0.983	0.993	2.14383e-94	1	MALAT1
2.11951e-98	-0.61001	1	0.988	3.01669e-94	1	HLA-B
2.34398e-98	-0.537696	0.993	0.989	3.33618e-94	1	HLA-C
5.03576e-98	0.695394	0.64	0.113	7.16739e-94	1	WFDC2
1.2435e-97	0.856988	0.561	0.086	1.76987e-93	1	CST1
1.25194e-97	0.645198	0.927	0.269	1.78188e-93	1	DTD1
4.06872e-97	0.861971	0.993	0.364	5.791e-93	1	CTHRC1
4.7055e-97	-0.627683	1	0.986	6.69733e-93	1	HLA-A
5.25131e-97	0.627354	0.911	0.247	7.47419e-93	1	DNTTIP1
6.16991e-97	0.502461	0.723	0.147	8.78164e-93	1	NPTN
8.4977e-97	0.740294	0.974	0.392	1.20948e-92	1	ETHE1
1.28962e-96	0.558164	0.769	0.172	1.83551e-92	1	BAIAP2
5.3103e-96	0.885004	0.983	0.426	7.55816e-92	1	PLAU
6.72027e-96	0.657108	0.967	0.303	9.56496e-92	1	CD82
8.83575e-96	0.770937	0.95	0.264	1.25759e-91	1	MXRA8
9.0196e-96	0.601603	0.459	0.052	1.28376e-91	1	CA12
2.71609e-95	0.625404	0.908	0.27	3.86581e-91	1	BLCAP
6.93328e-95	0.708922	0.908	0.234	9.86813e-91	1	ITGA6
1.96018e-94	0.660932	0.828	0.188	2.78993e-90	1	COL8A1
8.61037e-94	0.901955	0.505	0.071	1.22551e-89	1	KRT6A
1.05054e-93	0.50344	0.472	0.059	1.49523e-89	1	ZBED2
1.53559e-93	0.608812	0.726	0.161	2.18561e-89	1	BHLHE41
3.92115e-93	0.599681	0.432	0.047	5.58097e-89	1	KRT16
1.54932e-92	0.519157	0.776	0.176	2.20514e-88	1	PTPRK
3.20602e-92	0.551874	0.812	0.186	4.56313e-88	1	ACOT7
9.43075e-92	0.584167	0.861	0.222	1.34228e-87	1	P4HA2
9.02848e-91	0.586961	0.805	0.204	1.28502e-86	1	SLC31A2
2.70793e-90	0.560532	0.766	0.172	3.85419e-86	1	ADAM8
1.51049e-89	0.67666	0.865	0.22	2.14988e-85	1	SRPX
2.69304e-89	0.759066	0.974	0.375	3.83301e-85	1	SLC16A3
2.80593e-89	0.547638	0.795	0.2	3.99368e-85	1	SMIM4
4.42101e-89	0.525437	0.683	0.144	6.29243e-85	1	ADAM19
5.31398e-89	-0.547923	0.997	0.981	7.56339e-85	1	RPS29
1.07318e-88	0.632188	0.937	0.299	1.52745e-84	1	PLEC
1.92527e-88	0.511326	0.818	0.205	2.74024e-84	1	PGM1
3.27811e-88	0.546342	0.653	0.136	4.66574e-84	1	RUNX2
7.72063e-88	0.500083	0.858	0.194	1.09888e-83	1	PTTG1
8.95363e-88	0.535806	0.769	0.178	1.27437e-83	1	GAS2L1
1.2162e-87	0.763523	0.997	0.419	1.73102e-83	1	OCIAD2
1.79677e-86	0.554901	0.812	0.203	2.55735e-82	1	MALL
2.91893e-86	0.696386	0.983	0.402	4.15451e-82	1	PRNP
3.44792e-86	0.517098	0.904	0.259	4.90742e-82	1	APOBEC3G
4.56765e-86	0.508492	0.785	0.196	6.50113e-82	1	PLXNB2
2.16682e-85	0.535425	0.898	0.248	3.08403e-81	1	PAFAH1B3
3.34635e-85	0.536038	0.838	0.22	4.76286e-81	1	SNX7
4.67888e-85	0.693963	0.498	0.077	6.65945e-81	1	S100A14
4.89114e-85	0.517111	0.746	0.179	6.96156e-81	1	RIN2
1.95679e-84	0.612708	0.898	0.277	2.7851e-80	1	UCHL3
2.89421e-84	0.613136	0.815	0.225	4.11933e-80	1	TWF1
8.49468e-84	0.530255	0.861	0.242	1.20905e-79	1	SLC35B2
1.05173e-83	0.569856	0.937	0.3	1.49692e-79	1	IVNS1ABP
1.58121e-83	0.559479	0.931	0.28	2.25053e-79	1	ARL4C
2.50948e-83	0.535349	0.871	0.234	3.57175e-79	1	SMIM3
3.48375e-83	0.655516	0.944	0.328	4.95843e-79	1	PPFIBP1
6.67312e-83	0.63026	0.452	0.063	9.49785e-79	1	SAA1
7.79774e-83	0.588358	0.855	0.219	1.10985e-78	1	INHBA
1.61233e-82	0.522964	0.818	0.207	2.29483e-78	1	CHPF
1.94952e-82	0.568822	0.974	0.345	2.77476e-78	1	CARD19
3.86496e-82	0.517618	0.875	0.249	5.50099e-78	1	CRLS1
9.61527e-82	0.500245	0.908	0.259	1.36854e-77	1	MALSU1
3.11242e-81	0.700342	0.752	0.207	4.42991e-77	1	SLC29A1
6.54583e-81	0.622684	0.71	0.167	9.31668e-77	1	IGF2
9.45899e-81	0.63044	0.947	0.337	1.3463e-76	1	PON2
1.82165e-80	0.531796	0.875	0.251	2.59276e-76	1	TPBG
9.15175e-80	0.609249	0.937	0.301	1.30257e-75	1	PHLDA2
1.2664e-79	0.637745	0.957	0.29	1.80246e-75	1	C12orf75
3.45122e-79	-0.953609	0.944	0.909	4.91212e-75	1	HLA-E
3.79235e-79	0.641133	1	0.56	5.39765e-75	1	PLP2
4.78473e-79	0.612719	0.997	0.778	6.81011e-75	1	MT2A
1.09368e-78	0.512301	0.924	0.276	1.55664e-74	1	NET1
3.41643e-78	0.502337	0.706	0.169	4.8626e-74	1	NT5DC2
4.25512e-78	-0.538324	1	0.98	6.05631e-74	1	HSP90AA1
4.2941e-78	0.642616	0.95	0.323	6.11179e-74	1	CAV2
3.08317e-77	0.607934	0.637	0.141	4.38828e-73	1	CD24
4.20534e-77	0.704975	0.99	0.424	5.98547e-73	1	PHLDA1
8.89734e-77	0.50393	0.888	0.274	1.26636e-72	1	LYPLA2
3.80838e-76	0.620015	0.911	0.313	5.42047e-72	1	DST
8.00287e-76	0.512693	0.568	0.112	1.13905e-71	1	F3
8.94807e-76	0.638123	0.591	0.129	1.27358e-71	1	FSTL3
1.40675e-75	0.552288	0.924	0.326	2.00222e-71	1	IP6K2
3.54315e-75	0.530917	0.314	0.026	5.04297e-71	1	RP11-400N13.3
3.64718e-75	0.513561	0.875	0.269	5.19103e-71	1	MEF2A
1.36659e-74	0.550259	0.855	0.25	1.94507e-70	1	JAG1
4.21893e-74	0.616646	0.957	0.326	6.0048e-70	1	MMP14
2.07951e-73	0.698079	0.548	0.111	2.95976e-69	1	FXYD3
2.29741e-73	0.705432	0.957	0.364	3.2699e-69	1	TINAGL1
2.55093e-73	0.541053	0.95	0.333	3.63074e-69	1	SH3KBP1
1.25498e-72	0.505044	0.686	0.166	1.78622e-68	1	GJB2
3.32229e-72	0.529703	0.881	0.277	4.72861e-68	1	AIG1
5.55682e-71	0.562871	0.957	0.396	7.90902e-67	1	UBE2E3
1.03078e-69	0.539854	0.888	0.269	1.46711e-65	1	CKAP4
1.26798e-66	0.681777	0.98	0.47	1.80472e-62	1	TGFBI
1.33855e-66	0.584977	0.97	0.428	1.90516e-62	1	CMTM3
1.35336e-66	0.51951	0.927	0.344	1.92624e-62	1	AGTRAP
1.57311e-66	0.531858	0.914	0.328	2.239e-62	1	YIPF5
1.69844e-66	0.677917	0.98	0.483	2.4174e-62	1	FABP5
3.09759e-66	0.526561	0.901	0.344	4.4088e-62	1	AP1S1
4.55119e-65	0.723481	0.66	0.185	6.47771e-61	1	CXCL14
4.44089e-64	0.574114	0.983	0.503	6.32071e-60	1	CKLF
6.10932e-64	-1.0154	0.805	0.866	8.6954e-60	1	FOS
4.16707e-63	-0.783577	0.967	0.92	5.93099e-59	1	JUNB
9.64058e-63	-0.943949	0.861	0.882	1.37214e-58	1	DUSP1
4.40011e-62	0.604116	0.997	0.516	6.26267e-58	1	CD44
1.02841e-60	0.545668	0.99	0.543	1.46373e-56	1	CTSA
4.88867e-59	0.526637	0.983	0.46	6.95804e-55	1	HM13
2.59348e-58	0.508223	0.947	0.381	3.6913e-54	1	PLIN3
3.54391e-58	0.583771	0.987	0.44	5.04405e-54	1	ID1
4.553e-58	0.53664	0.967	0.45	6.48029e-54	1	CD55
7.55862e-58	0.529523	1	0.525	1.07582e-53	1	APLP2
4.54833e-57	0.535635	0.314	0.042	6.47363e-53	1	MMP10
8.77837e-57	0.527002	0.964	0.423	1.24942e-52	1	PSMD2
2.07593e-56	0.500144	0.97	0.416	2.95467e-52	1	CAPN2
2.43891e-56	-0.773766	0.927	0.891	3.4713e-52	1	JUN
6.90774e-56	0.524484	0.964	0.401	9.83179e-52	1	PLAUR
1.95926e-54	0.508048	0.822	0.297	2.78861e-50	1	RBP1
1.38227e-53	-0.661052	0.974	0.925	1.96738e-49	1	HSPA1A
1.59999e-47	-1.29563	0.571	0.736	2.27727e-43	1	ZFP36
3.55469e-45	-0.517085	0.974	0.863	5.05939e-41	1	PABPC1
4.19737e-38	-0.588559	0.937	0.843	5.97412e-34	1	GLTSCR2
7.6397e-38	-1.17433	0.142	0.5	1.08736e-33	1	STOM
2.4441e-36	-1.20282	0.551	0.675	3.47869e-32	1	ARHGDIB
5.83786e-36	-1.61234	0.274	0.558	8.30903e-32	1	HLA-DPB1
6.6242e-36	-1.20934	0.152	0.497	9.42822e-32	1	SERPING1
1.38247e-35	-1.58443	0.248	0.544	1.96767e-31	1	HLA-DPA1
2.14464e-35	-0.610765	0.987	0.885	3.05246e-31	1	BTG1
4.7783e-35	-1.53435	0.155	0.488	6.80095e-31	1	HLA-DQB1
2.65455e-34	-0.549703	0.98	0.869	3.77822e-30	1	DNAJA1
3.69756e-32	-0.701997	0.927	0.804	5.26273e-28	1	IFITM2
8.7901e-32	-1.56585	0.116	0.44	1.25109e-27	1	SPARCL1
2.63921e-30	-1.30268	0.099	0.416	3.75639e-26	1	HLA-DMA
3.38155e-30	-1.2029	0.257	0.524	4.81297e-26	1	NR4A1
4.46454e-29	-1.44183	0.568	0.649	6.35437e-25	1	HLA-DRB1
3.47749e-28	-0.822583	0.591	0.696	4.94951e-24	1	FOSB
5.0684e-28	-1.17203	0.149	0.444	7.21386e-24	1	A2M
3.4108e-27	-1.37649	0.043	0.343	4.85458e-23	1	PTPRC
5.10799e-26	-0.976702	0.036	0.326	7.27021e-22	1	GYPC
6.15153e-26	-0.911197	0.059	0.349	8.75547e-22	1	ALDH2
8.54014e-26	-1.15762	0.294	0.51	1.21552e-21	1	TYMP
2.07904e-25	-0.710525	0.799	0.751	2.9591e-21	1	PPP1R15A
2.12064e-25	-0.931781	0.677	0.696	3.0183e-21	1	NFKBIA
1.15108e-24	-0.647674	0.815	0.721	1.63834e-20	1	C4orf3
1.30393e-24	-0.823968	0.023	0.3	1.85588e-20	1	LY96
8.83616e-24	-1.03614	0.01	0.277	1.25765e-19	1	GIMAP7
2.34908e-23	-0.846302	0.013	0.277	3.34344e-19	1	KCNQ1OT1
3.0647e-23	-1.12935	0.059	0.326	4.36199e-19	1	TMEM176B
4.08919e-23	-1.15576	0.02	0.282	5.82014e-19	1	CD53
2.25498e-22	-0.81059	0.05	0.308	3.20951e-18	1	C1orf54
3.38235e-22	-1.08026	0.02	0.274	4.8141e-18	1	ITM2A
3.40749e-22	-0.686573	0.878	0.771	4.84988e-18	1	KLF6
3.98091e-22	-1.21605	0.043	0.299	5.66603e-18	1	CD37
1.07781e-21	-0.754172	0.802	0.717	1.53405e-17	1	PNRC1
1.38791e-21	-0.93171	0.023	0.272	1.97541e-17	1	GIMAP4
1.72e-21	-0.563116	0.934	0.767	2.44807e-17	1	SRSF7
2.89498e-21	-0.802382	0.782	0.701	4.12042e-17	1	ZFP36L2
6.48483e-21	-1.10214	0.05	0.295	9.22985e-17	1	LSP1
9.63187e-21	-1.42061	0.066	0.311	1.3709e-16	1	CD52
2.29593e-20	-0.886762	0.036	0.275	3.2678e-16	1	TMEM176A
3.05038e-20	-0.716986	0.977	0.791	4.34161e-16	1	CD74
3.14391e-20	-1.53648	0.106	0.343	4.47473e-16	1	CXCR4
1.2374e-19	-0.956813	0.155	0.381	1.7612e-15	1	NUPR1
4.13872e-19	-1.11695	0.043	0.271	5.89064e-15	1	ITGB2
4.97138e-19	-0.92736	0.04	0.267	7.07576e-15	1	BCAM
2.65604e-18	-1.24628	0.129	0.347	3.78034e-14	1	HLA-DQA1
2.85547e-18	-0.975747	0.053	0.274	4.06418e-14	1	HLA-DMB
4.49922e-18	-0.827907	0.086	0.306	6.40374e-14	1	MAFB
4.54699e-18	-1.32215	0.142	0.354	6.47172e-14	1	CORO1A
5.12156e-18	-0.769317	0.096	0.314	7.28951e-14	1	LGALS9
1.0358e-17	-1.03367	0.31	0.471	1.47425e-13	1	NR4A2
1.4532e-17	-1.13641	0.102	0.316	2.06835e-13	1	BGN
1.76504e-17	-1.25856	0.696	0.633	2.51218e-13	1	HLA-DRA
1.8945e-17	-1.0245	0.274	0.445	2.69644e-13	1	SLC2A3
2.80252e-17	-0.989302	0.208	0.398	3.98882e-13	1	RARRES3
3.09883e-17	-0.625351	0.947	0.8	4.41056e-13	1	DNAJB1
5.15176e-17	-0.921114	0.208	0.405	7.3325e-13	1	ATF3
7.90536e-17	-0.971775	0.521	0.57	1.12517e-12	1	SOCS3
9.0299e-17	-0.77168	0.604	0.624	1.28522e-12	1	TXNIP
9.41917e-17	-0.975719	0.053	0.26	1.34063e-12	1	PECAM1
1.02235e-16	-1.19253	0.089	0.296	1.45511e-12	1	RNASE1
1.63847e-16	-0.626565	0.812	0.672	2.33204e-12	1	SDCBP
3.65786e-16	-1.11926	0.073	0.274	5.20623e-12	1	HCST
5.95334e-16	-0.839085	0.106	0.304	8.47338e-12	1	C10orf54
7.06938e-15	-0.995983	0.122	0.309	1.00618e-10	1	EVL
5.2126e-14	-1.07442	0.099	0.28	7.41909e-10	1	SPRY1
6.75336e-14	-0.565676	0.881	0.713	9.61205e-10	1	SRSF5
7.27423e-14	-0.995277	0.33	0.452	1.03534e-09	1	KLF2
1.09396e-13	-0.760553	0.825	0.669	1.55703e-09	1	SRGN
1.40081e-13	-0.998849	0.145	0.318	1.99377e-09	1	COL6A2
1.7188e-13	-0.935755	0.525	0.546	2.44637e-09	1	BTG2
2.4698e-13	-0.57979	0.809	0.647	3.51527e-09	1	SH3BGRL
3.21e-13	-0.669403	0.106	0.281	4.56879e-09	1	CFI
3.26814e-13	-0.681639	0.099	0.274	4.65154e-09	1	PLA2G16
3.95962e-13	-0.735592	0.578	0.564	5.63572e-09	1	FCGRT
5.28973e-13	-0.843232	0.36	0.454	7.52888e-09	1	TCF4
5.70047e-13	-0.734639	0.116	0.285	8.11348e-09	1	COL18A1
8.79526e-13	-0.70103	0.69	0.646	1.25183e-08	1	ID2
1.07208e-12	-1.26063	0.102	0.269	1.5259e-08	1	RGS1
1.63127e-12	-0.815574	0.096	0.265	2.32179e-08	1	IGFBP2
1.82529e-12	-0.958302	0.122	0.288	2.59793e-08	1	ZNF331
2.8879e-12	-0.731154	0.257	0.389	4.11035e-08	1	CYB5A
1.88369e-11	-1.066	0.102	0.257	2.68105e-07	1	AQP1
2.75585e-11	-1.13868	0.439	0.489	3.9224e-07	1	IL32
2.76485e-11	-0.775148	0.597	0.568	3.93521e-07	1	CLK1
3.3031e-11	-0.795474	0.168	0.313	4.70131e-07	1	ITM2C
3.95329e-11	-0.768599	0.7	0.594	5.62672e-07	1	COTL1
5.54998e-11	-0.672041	0.112	0.263	7.89928e-07	1	FILIP1L
7.15837e-11	-0.897778	0.215	0.345	1.01885e-06	1	GPSM3
1.51496e-10	-0.667156	0.191	0.327	2.15624e-06	1	LGMN
1.86862e-10	-0.888974	0.129	0.276	2.65961e-06	1	TNFAIP3
2.63829e-10	-0.576944	0.825	0.672	3.75508e-06	1	GADD45B
4.2766e-10	-0.725439	0.439	0.487	6.08689e-06	1	HLA-F
8.35625e-10	-1.0093	0.231	0.344	1.18935e-05	1	SERPINF1
1.07547e-09	-0.831889	0.277	0.379	1.53072e-05	1	PLIN2
1.43884e-09	-0.869546	0.122	0.256	2.0479e-05	1	PCOLCE
1.51596e-09	-0.761682	0.591	0.539	2.15767e-05	1	ARID5B
1.84744e-09	-0.756582	0.234	0.345	2.62945e-05	1	LHFP
2.69407e-09	-0.838472	0.38	0.435	3.83446e-05	1	ENG
6.1333e-09	-0.717849	0.201	0.313	8.72953e-05	1	MEF2C
1.01521e-08	-0.786563	0.152	0.275	0.000144495	1	LIMD2
1.02891e-08	-0.699592	0.373	0.419	0.000146445	1	DDAH2
1.08291e-08	-0.601795	0.132	0.255	0.000154131	1	FKBP10
1.68061e-08	-1.03556	0.442	0.466	0.000239202	1	MGP
1.77549e-08	-0.57431	0.68	0.59	0.000252706	1	PSMB9
3.6034e-08	-0.741317	0.469	0.48	0.000512872	1	CEBPD
6.01821e-08	-0.534103	0.848	0.658	0.000856571	1	HERPUD1
6.6517e-08	-0.620239	0.393	0.448	0.000946737	1	GBP2
7.36489e-08	-0.737611	0.158	0.269	0.00104824	1	RGS16
1.27217e-07	-0.66382	0.828	0.654	0.00181069	1	S100A4
1.5249e-07	-1.02778	0.172	0.277	0.00217039	1	COL3A1
2.19066e-07	-0.96052	0.436	0.443	0.00311796	1	CREM
3.13731e-07	-0.622852	0.185	0.286	0.00446534	1	LMCD1
3.32604e-07	-0.768424	0.475	0.457	0.00473395	1	HMGB2
3.59058e-07	-0.803453	0.587	0.507	0.00511048	1	SELM
5.01775e-07	-0.739906	0.736	0.594	0.00714177	1	TSC22D3
5.89516e-07	-0.707115	0.264	0.336	0.00839058	1	SEPP1
7.71504e-07	-1.01706	0.277	0.349	0.0109808	1	RGCC
1.25529e-06	-0.626311	0.224	0.305	0.0178665	1	SH3BP5
2.84628e-06	-0.612256	0.799	0.625	0.0405111	1	HSPA1B
2.86403e-06	-0.683242	0.34	0.397	0.0407637	1	DDIT4
0	2.33482	0.959	0.036	0	2	AIF1
0	2.17588	0.897	0.026	0	2	MS4A6A
0	1.9395	0.866	0.016	0	2	MNDA
0	1.84049	0.883	0.015	0	2	SPI1
0	1.80337	0.817	0.01	0	2	IGSF6
8.53901e-307	1.90332	0.914	0.045	1.21536e-302	2	LST1
1.69639e-303	1.65025	0.762	0.011	2.41447e-299	2	MS4A7
3.62916e-299	1.63727	0.797	0.017	5.16538e-295	2	RNASE6
1.08997e-295	1.54452	0.734	0.008	1.55136e-291	2	CYBB
2.6569e-292	2.21069	0.986	0.085	3.78157e-288	2	TYROBP
4.70596e-290	2.23912	0.924	0.069	6.698e-286	2	LYZ
1.67912e-286	1.89156	0.852	0.044	2.3899e-282	2	FCGR2A
2.04362e-282	1.6707	0.841	0.034	2.90869e-278	2	C1orf162
2.77708e-280	1.42742	0.724	0.012	3.95262e-276	2	CD86
3.61331e-278	2.1244	0.99	0.101	5.14282e-274	2	FCER1G
4.30318e-268	2.32439	0.807	0.045	6.12471e-264	2	C1QC
1.37318e-258	1.38246	0.666	0.011	1.95445e-254	2	HCK
3.65973e-249	1.31615	0.676	0.015	5.2089e-245	2	CLEC7A
4.68582e-246	1.55855	0.621	0.007	6.66932e-242	2	MRC1
4.80726e-241	1.38879	0.583	0.002	6.84218e-237	2	MS4A4A
7.90234e-239	1.27089	0.628	0.011	1.12474e-234	2	CLEC4A
4.59198e-238	1.31057	0.683	0.019	6.53576e-234	2	LY86
7.8866e-236	1.50522	0.717	0.037	1.1225e-231	2	CSF1R
5.39963e-235	2.2837	0.814	0.073	7.68529e-231	2	C1QB
8.08858e-231	2.30017	0.841	0.092	1.15125e-226	2	C1QA
1.22935e-230	1.20736	0.566	0.003	1.74973e-226	2	FPR3
1.88593e-230	1.74492	0.69	0.027	2.68425e-226	2	FCGR3A
1.87761e-228	1.1551	0.572	0.005	2.67241e-224	2	CSF2RA
1.74858e-225	1.24937	0.569	0.006	2.48876e-221	2	LILRB4
5.99813e-222	1.22735	0.652	0.021	8.53713e-218	2	LAIR1
8.33025e-221	1.27832	0.669	0.024	1.18564e-216	2	PLEK
3.05534e-217	1.64342	0.921	0.132	4.34867e-213	2	HLA-DMB
1.37276e-215	1.91376	0.828	0.096	1.95384e-211	2	CD14
4.21309e-210	1.33385	0.528	0.004	5.99649e-206	2	OLR1
3.6917e-206	1.18423	0.624	0.025	5.25439e-202	2	TBXAS1
5.66543e-206	1.47611	0.531	0.007	8.06361e-202	2	TREM2
1.17875e-204	1.23817	0.552	0.011	1.67771e-200	2	SLCO2B1
1.32819e-204	1.41851	0.552	0.011	1.89041e-200	2	RP11-1143G9.4
2.37906e-201	1.19111	0.538	0.009	3.38612e-197	2	FCGR1A
8.96892e-200	1.12047	0.603	0.02	1.27655e-195	2	CD300A
9.03369e-200	1.40022	0.579	0.017	1.28577e-195	2	FCGR2B
6.48818e-198	1.16193	0.483	0.002	9.23463e-194	2	CD163
8.39949e-193	1.67136	0.966	0.21	1.1955e-188	2	HLA-DQA1
7.44355e-192	1.07977	0.531	0.011	1.05944e-187	2	2021-03-01
3.11813e-190	1.1312	0.483	0.004	4.43803e-186	2	PILRA
3.08506e-189	1.34115	0.49	0.006	4.39096e-185	2	VSIG4
1.5246e-186	1.05943	0.638	0.034	2.16996e-182	2	CD4
2.9513e-186	1.03911	0.472	0.004	4.20058e-182	2	GPR34
9.85751e-186	0.994462	0.448	0.001	1.40302e-181	2	CLEC5A
3.59226e-185	1.43231	0.697	0.064	5.11287e-181	2	IFI30
1.55202e-183	1.32766	0.466	0.004	2.20899e-179	2	CLEC10A
1.51275e-182	1.30556	0.693	0.056	2.1531e-178	2	FGL2
1.68471e-181	1.73146	0.914	0.224	2.39785e-177	2	CD68
3.06584e-179	0.937577	0.455	0.004	4.36361e-175	2	CD33
2.31015e-174	0.898718	0.438	0.003	3.28803e-170	2	LRRC25
3.13646e-171	1.48954	0.803	0.134	4.46412e-167	2	CPVL
5.39767e-171	1.34106	0.91	0.129	7.6825e-167	2	ITGB2
5.49334e-170	1.77743	0.655	0.061	7.81868e-166	2	S100A9
6.87057e-169	0.992721	0.421	0.002	9.77888e-165	2	MPEG1
7.283e-169	1.09033	0.438	0.005	1.03659e-164	2	C5AR1
1.73553e-168	1.21149	0.734	0.08	2.47018e-164	2	TNFSF13B
2.35518e-168	1.06349	0.566	0.03	3.35212e-164	2	ADAP2
7.45397e-168	1.23544	0.641	0.058	1.06092e-163	2	RASSF4
6.02574e-166	1.49053	0.483	0.015	8.57643e-162	2	IL1B
1.17592e-165	0.866369	0.445	0.007	1.67368e-161	2	TNFAIP8L2
1.14906e-164	1.09831	0.552	0.028	1.63545e-160	2	C3AR1
1.23551e-162	1.48736	0.779	0.138	1.7585e-158	2	FAM26F
7.20727e-158	1.40951	0.983	0.351	1.02581e-153	2	HLA-DQB1
2.84859e-157	1.54243	0.566	0.037	4.05439e-153	2	CCL3
2.09375e-156	0.966357	0.593	0.044	2.98003e-152	2	LAT2
2.80983e-156	1.14864	0.586	0.045	3.99923e-152	2	PHACTR1
5.65302e-155	1.45572	0.948	0.312	8.04594e-151	2	CTSS
2.59532e-154	1.31336	0.428	0.009	3.69391e-150	2	FOLR2
4.13292e-152	0.919702	0.631	0.051	5.88239e-148	2	FERMT3
2.69642e-151	1.44513	0.9	0.192	3.83782e-147	2	ALOX5AP
2.29291e-150	0.846119	0.528	0.027	3.2635e-146	2	NCKAP1L
2.83011e-150	1.29497	1	0.584	4.02809e-146	2	HLA-DRA
1.02775e-148	1.27572	0.959	0.274	1.46279e-144	2	HLA-DMA
1.66942e-147	0.973618	0.576	0.043	2.37609e-143	2	IRF8
1.16278e-145	1.13907	0.586	0.058	1.65498e-141	2	SLC7A7
1.04346e-144	1.30629	0.986	0.44	1.48515e-140	2	HLA-DPB1
1.46155e-143	1.29132	0.979	0.423	2.08023e-139	2	HLA-DPA1
3.69268e-142	1.1317	0.462	0.024	5.25579e-138	2	MSR1
5.26547e-139	1.27406	0.966	0.399	7.49435e-135	2	TYMP
6.50993e-138	1.1201	0.603	0.053	9.26558e-134	2	JAML
5.75143e-136	0.899979	0.552	0.044	8.18601e-132	2	HAVCR2
7.8455e-136	1.22439	0.786	0.152	1.11665e-131	2	TMEM176A
9.44286e-136	1.33008	0.828	0.199	1.344e-131	2	TMEM176B
8.09511e-134	1.77544	0.607	0.078	1.15218e-129	2	APOC1
4.0476e-130	0.855643	0.528	0.041	5.76094e-126	2	NCF4
5.79912e-129	0.795248	0.448	0.022	8.25389e-125	2	CD84
2.9475e-128	1.12484	0.997	0.579	4.19517e-124	2	HLA-DRB1
2.96133e-128	0.799813	0.397	0.015	4.21486e-124	2	SLAMF8
2.53809e-127	1.27519	0.631	0.095	3.61246e-123	2	HMOX1
1.57597e-125	1.04885	0.466	0.036	2.24308e-121	2	FPR1
4.91543e-123	0.894197	0.338	0.006	6.99613e-119	2	PLD4
2.2881e-122	1.04078	0.776	0.147	3.25665e-118	2	UCP2
3.68444e-122	1.28383	0.441	0.029	5.24406e-118	2	S100B
1.29657e-121	1.0664	0.655	0.11	1.84541e-117	2	LYN
3.4749e-121	0.96537	0.383	0.016	4.94583e-117	2	SLC11A1
3.79899e-121	0.882621	1	0.788	5.40711e-117	2	CD74
4.2646e-121	0.695435	0.328	0.005	6.0698e-117	2	OSCAR
5.20793e-120	0.733341	0.99	0.737	7.41245e-116	2	GPX1
6.95782e-120	1.68293	0.607	0.096	9.90307e-116	2	CXCL8
1.3229e-119	1.14072	0.928	0.435	1.88288e-115	2	CAPG
2.01488e-119	0.813182	0.369	0.013	2.86777e-115	2	LILRB3
5.89699e-119	1.16821	0.652	0.128	8.39319e-115	2	NCF2
2.71409e-118	0.895802	0.448	0.035	3.86297e-114	2	SYK
1.25491e-116	0.88328	0.586	0.073	1.78611e-112	2	ARRB2
5.96425e-116	0.742155	0.328	0.007	8.48891e-112	2	CSF3R
1.07231e-115	0.886084	0.948	0.64	1.52622e-111	2	GRN
8.26623e-115	1.07057	0.876	0.25	1.17653e-110	2	RGS10
7.9616e-114	0.588771	0.355	0.012	1.13317e-109	2	BTK
2.78577e-113	0.635004	0.276	0	3.96498e-109	2	RP5-839B4.8
5.84716e-112	0.990738	0.948	0.431	8.32226e-108	2	VAMP8
2.45955e-111	1.1395	0.486	0.055	3.50068e-107	2	F13A1
5.05668e-111	0.644079	0.283	0.002	7.19717e-107	2	TFEC
1.41724e-110	0.735302	0.355	0.013	2.01716e-106	2	AOAH
5.40427e-110	0.761483	0.99	0.711	7.69189e-106	2	NPC2
5.61498e-110	0.680565	0.517	0.049	7.9918e-106	2	WAS
1.80303e-109	1.36632	0.376	0.021	2.56625e-105	2	S100A8
2.17268e-109	0.674299	0.283	0.002	3.09238e-105	2	CD300LF
3.39605e-109	0.682438	0.314	0.007	4.8336e-105	2	CXorf21
4.06485e-109	1.09821	0.907	0.356	5.7855e-105	2	RNASET2
9.82131e-108	0.58086	1	0.797	1.39787e-103	2	CST3
1.29778e-107	1.09937	0.745	0.2	1.84712e-103	2	ARHGAP18
3.03935e-107	0.563479	1	0.984	4.32591e-103	2	FTL
3.16653e-107	0.633921	0.266	0.001	4.50692e-103	2	RGS18
3.67038e-106	0.990059	0.6	0.101	5.22405e-102	2	ALOX5
4.92083e-106	0.716674	0.417	0.029	7.00382e-102	2	PARVG
7.34674e-106	0.643366	0.262	0.001	1.04566e-101	2	P2RY13
9.45306e-106	1.00222	0.507	0.059	1.34545e-101	2	FBP1
5.02486e-105	0.703885	0.272	0.002	7.15188e-101	2	RP11-1008C21.1
1.36874e-104	0.678128	0.283	0.004	1.94813e-100	2	SCIMP
2.05654e-104	0.637353	0.259	0.001	2.92708e-100	2	LILRB2
2.84685e-104	0.756368	0.321	0.011	4.05192e-100	2	CEBPA
2.52756e-103	0.724731	0.279	0.004	3.59748e-99	2	ITGAX
6.16713e-103	0.772604	0.721	0.12	8.77768e-99	2	FYB
1.06081e-102	0.633309	0.259	0.001	1.50984e-98	2	FCGR1B
2.22015e-102	0.862532	0.821	0.15	3.15994e-98	2	CD53
2.91023e-102	0.708118	0.283	0.005	4.14213e-98	2	LINC01094
8.9172e-102	0.967097	0.803	0.171	1.26918e-97	2	LSP1
2.378e-101	1.15653	0.652	0.153	3.3846e-97	2	CXCL16
5.74793e-101	0.667241	0.283	0.005	8.18104e-97	2	PIK3AP1
4.23461e-100	0.638526	0.41	0.03	6.02712e-96	2	SELPLG
1.14396e-99	0.647515	0.521	0.059	1.6282e-95	2	MYO1F
2.06804e-99	1.18034	0.69	0.196	2.94343e-95	2	CSTA
3.2761e-99	0.831009	0.307	0.011	4.66287e-95	2	LINC01272
3.39121e-99	1.14137	0.545	0.087	4.82671e-95	2	BCL2A1
1.5204e-98	0.945151	0.638	0.137	2.16399e-94	2	PTPN6
1.75677e-98	0.752402	0.703	0.121	2.50041e-94	2	EVI2B
3.50876e-98	0.803996	0.7	0.127	4.99402e-94	2	HCLS1
3.64844e-98	0.569429	0.283	0.006	5.19283e-94	2	LILRB1
3.8473e-98	0.777969	0.421	0.038	5.47586e-94	2	CECR1
3.94215e-98	1.17374	0.614	0.118	5.61086e-94	2	ACP5
5.19826e-98	1.41778	0.638	0.155	7.39868e-94	2	C15orf48
3.23943e-97	0.640243	0.355	0.021	4.61069e-93	2	TM6SF1
1.02415e-96	0.897638	0.276	0.006	1.45768e-92	2	LGALS2
1.27292e-96	0.992632	0.872	0.415	1.81174e-92	2	PYCARD
9.83018e-96	0.568132	0.272	0.006	1.39913e-91	2	SIGLEC10
6.92811e-95	0.605272	0.297	0.011	9.86079e-91	2	APOBR
2.80385e-94	0.82861	0.355	0.025	3.99072e-90	2	NPL
5.71631e-94	0.728272	0.369	0.027	8.13602e-90	2	FGR
9.28402e-94	0.95553	0.976	0.447	1.32139e-89	2	LAPTM5
1.63147e-92	0.547835	0.338	0.018	2.32207e-88	2	SNX20
9.94778e-92	1.16296	0.314	0.016	1.41587e-87	2	CCL13
2.76813e-91	0.680166	0.366	0.028	3.93987e-87	2	OGFRL1
7.04279e-90	0.641685	0.355	0.025	1.0024e-85	2	HLA-DRB5
5.0795e-89	1.02763	0.748	0.235	7.22965e-85	2	ALDH2
1.297e-87	0.590382	0.997	0.806	1.84602e-83	2	CYBA
1.30762e-87	1.02767	0.293	0.014	1.86114e-83	2	HLA-DQB2
1.48131e-87	0.908373	0.879	0.448	2.10834e-83	2	CTSH
2.76937e-86	0.962729	0.741	0.236	3.94164e-82	2	SAMHD1
3.3046e-86	0.660693	0.466	0.057	4.70344e-82	2	LCP2
4.65029e-86	0.935351	0.71	0.186	6.61876e-82	2	LY96
5.50797e-86	0.532725	0.269	0.009	7.83949e-82	2	CLECL1
1.02616e-85	1.38706	0.331	0.025	1.46054e-81	2	MMP12
1.21594e-85	0.994401	0.734	0.253	1.73064e-81	2	RNF130
4.05612e-85	0.685509	0.552	0.089	5.77308e-81	2	EVI2A
5.38802e-85	0.812215	0.821	0.246	7.66877e-81	2	GPSM3
1.75452e-84	0.969441	0.341	0.028	2.49721e-80	2	IL1RN
5.70748e-84	1.15977	0.359	0.033	8.12346e-80	2	MMP9
1.03876e-83	1.08711	0.859	0.463	1.47846e-79	2	GLUL
1.53346e-83	0.858994	0.928	0.507	2.18258e-79	2	FCGRT
3.51692e-83	0.842486	0.645	0.122	5.00563e-79	2	GPR183
5.13181e-83	0.649622	0.345	0.027	7.30411e-79	2	RENBP
7.09169e-83	0.67289	0.955	0.755	1.00936e-78	2	PSAP
2.38972e-82	0.970634	0.607	0.159	3.40129e-78	2	SNX10
2.54592e-81	0.542817	0.255	0.01	3.62361e-77	2	STAC3
2.97184e-81	0.897733	0.876	0.436	4.22982e-77	2	CTSZ
2.88358e-80	0.602643	0.276	0.015	4.1042e-76	2	CD300C
1.96048e-79	0.762847	0.383	0.044	2.79035e-75	2	GK
1.14004e-78	0.888896	0.841	0.459	1.62262e-74	2	PPT1
4.12172e-78	0.572542	0.693	0.133	5.86645e-74	2	DOK2
5.37931e-78	0.696934	0.383	0.045	7.65638e-74	2	PTGS1
1.71252e-77	0.862687	0.71	0.212	2.43743e-73	2	LGALS9
1.86878e-77	0.63583	0.303	0.022	2.65983e-73	2	CCR1
3.85872e-77	0.819815	0.938	0.628	5.49212e-73	2	CTSC
5.01279e-76	0.573765	0.472	0.065	7.13471e-72	2	APBB1IP
1.99766e-75	0.618229	0.321	0.026	2.84326e-71	2	CYTH4
4.15597e-75	0.805978	0.459	0.083	5.9152e-71	2	PTAFR
1.71182e-74	-1.30443	0.507	0.804	2.43644e-70	2	IGFBP7
1.72387e-73	0.588943	0.786	0.176	2.45358e-69	2	CD37
1.56037e-72	0.626951	0.914	0.639	2.22088e-68	2	AP2S1
1.69555e-72	0.806962	0.514	0.111	2.41327e-68	2	FUOM
1.0028e-71	0.661541	0.293	0.023	1.42729e-67	2	ASGR1
9.20918e-71	0.889419	0.607	0.186	1.31074e-66	2	SMCO4
1.22661e-70	0.983962	0.666	0.211	1.74583e-66	2	MAFB
3.32449e-70	0.798591	0.786	0.339	4.73174e-66	2	FAM49B
5.26412e-70	0.534218	0.352	0.039	7.49243e-66	2	DOCK2
5.99135e-70	0.776482	0.272	0.02	8.52748e-66	2	VMO1
3.37136e-69	-1.52035	0.114	0.678	4.79845e-65	2	CALD1
3.84773e-69	0.879211	0.597	0.18	5.47648e-65	2	PLBD1
1.69036e-68	0.783705	0.521	0.124	2.40588e-64	2	TNFSF12
2.53875e-68	0.764685	0.286	0.022	3.61341e-64	2	OSM
2.97665e-68	0.865729	0.717	0.314	4.23667e-64	2	RAB32
5.2067e-68	0.787297	0.907	0.561	7.4107e-64	2	COTL1
6.00639e-68	0.906749	0.676	0.263	8.54889e-64	2	HNMT
7.66905e-68	0.69495	0.952	0.64	1.09154e-63	2	CTSB
9.04895e-68	0.625117	0.255	0.017	1.28794e-63	2	ADGRE2
1.20381e-67	0.765691	0.786	0.3	1.71338e-63	2	LCP1
1.49747e-67	0.93896	0.652	0.209	2.13134e-63	2	CD83
2.05333e-67	0.618677	0.341	0.04	2.92251e-63	2	HLA-DOA
2.25666e-66	0.58243	0.717	0.168	3.2119e-62	2	HCST
5.53009e-66	0.819089	0.503	0.121	7.87097e-62	2	MPP1
3.22502e-65	0.748088	0.424	0.081	4.59018e-61	2	SLC43A2
4.50231e-65	1.50943	0.534	0.149	6.40813e-61	2	SPP1
6.76892e-65	0.649011	0.386	0.062	9.63421e-61	2	SLC25A19
1.03132e-64	0.691557	0.524	0.111	1.46787e-60	2	ABI3
7.50831e-64	0.766231	0.786	0.391	1.06866e-59	2	RHOG
3.07668e-63	0.848421	0.59	0.199	4.37904e-59	2	SIRPA
5.81624e-63	0.888374	0.69	0.309	8.27826e-59	2	MFSD1
6.35768e-63	0.853925	0.521	0.142	9.04888e-59	2	GCA
7.77535e-63	0.677578	0.997	0.642	1.10667e-58	2	SRGN
9.28597e-63	0.809575	0.862	0.421	1.32167e-58	2	PLAUR
7.34753e-62	0.541059	0.931	0.691	1.04577e-57	2	ANXA5
6.65371e-61	-1.37463	0.031	0.584	9.47022e-57	2	CAV1
1.18745e-60	0.76514	0.831	0.562	1.69009e-56	2	YWHAH
3.06429e-60	0.913887	0.721	0.371	4.3614e-56	2	CREG1
3.34653e-60	-1.23347	0.124	0.656	4.76312e-56	2	PDLIM1
3.66282e-60	0.513714	0.824	0.213	5.21329e-56	2	PTPRC
5.78821e-60	0.774975	0.807	0.303	8.23837e-56	2	SERPINA1
6.22606e-60	-1.22478	0.048	0.598	8.86154e-56	2	CNN3
7.07241e-60	-1.36628	0.193	0.689	1.00662e-55	2	SPARC
1.59348e-59	0.797175	0.472	0.123	2.26801e-55	2	IL18
1.9729e-59	-1.20947	0.069	0.616	2.80803e-55	2	PTRF
9.61662e-59	1.45607	0.603	0.231	1.36873e-54	2	APOE
1.21821e-58	-1.32976	0.093	0.62	1.73388e-54	2	NNMT
4.07319e-58	0.850707	0.7	0.313	5.79737e-54	2	RAB31
5.97034e-58	0.84805	0.638	0.257	8.49759e-54	2	ATP6V1B2
1.2338e-57	0.735922	0.772	0.39	1.75606e-53	2	GLRX
2.36011e-57	0.637258	0.334	0.052	3.35915e-53	2	NAIP
3.53791e-57	1.02808	0.517	0.139	5.03551e-53	2	CXCL2
4.83651e-57	0.771062	0.455	0.115	6.88381e-53	2	KYNU
1.02294e-56	0.594362	0.914	0.648	1.45594e-52	2	ATP6V1F
2.68162e-56	0.926723	0.624	0.243	3.81675e-52	2	LIPA
4.72538e-56	0.613516	0.331	0.053	6.72564e-52	2	ST3GAL6
1.0658e-55	0.948213	0.334	0.058	1.51695e-51	2	PLA2G7
1.25143e-55	0.603404	0.348	0.059	1.78116e-51	2	CISH
1.68347e-55	0.850033	0.841	0.487	2.39608e-51	2	SOD2
2.55073e-55	-1.45126	0.117	0.604	3.63046e-51	2	ADIRF
4.2667e-55	0.515872	0.286	0.035	6.0728e-51	2	APOL4
7.16537e-55	0.714773	0.752	0.397	1.01985e-50	2	GRB2
3.79077e-54	0.653511	0.334	0.058	5.3954e-50	2	TLR2
1.94286e-53	0.766605	0.845	0.452	2.76527e-49	2	RGS2
2.55505e-53	0.620018	0.348	0.059	3.6366e-49	2	SLC8A1
2.65895e-53	0.576052	0.259	0.029	3.78448e-49	2	DAPK1
1.58487e-52	0.815105	0.697	0.325	2.25575e-48	2	IER5
1.60109e-52	1.15171	0.403	0.096	2.27883e-48	2	CXCL3
1.79019e-52	0.505814	0.914	0.654	2.54798e-48	2	ATP6V0B
3.63577e-52	0.757313	0.386	0.081	5.17479e-48	2	C2
3.82224e-52	0.69421	0.359	0.065	5.4402e-48	2	STAB1
5.31753e-52	0.664201	0.645	0.18	7.56844e-48	2	RGS1
5.47068e-52	-1.21317	0.024	0.525	7.78642e-48	2	PRSS23
7.71544e-52	1.27463	0.272	0.036	1.09814e-47	2	CCL18
1.94198e-51	0.782734	0.859	0.656	2.76402e-47	2	CTSD
2.53894e-51	0.6457	0.345	0.064	3.61367e-47	2	FAM49A
3.94858e-51	0.646966	0.814	0.464	5.62001e-47	2	SYNGR2
7.72759e-51	0.631005	0.431	0.096	1.09987e-46	2	SERPINB9
1.14709e-50	0.688382	0.634	0.217	1.63265e-46	2	C10orf54
1.6728e-50	-1.21541	0.138	0.602	2.38089e-46	2	GNG11
4.37764e-50	-1.14424	0.066	0.555	6.23069e-46	2	CRIP2
8.57898e-50	0.577175	0.483	0.131	1.22105e-45	2	FAM105A
2.93815e-49	0.587692	0.879	0.453	4.18187e-45	2	GMFG
6.66406e-49	0.560109	0.345	0.061	9.48496e-45	2	STX11
1.50743e-48	-1.32655	0.066	0.541	2.14552e-44	2	CYR61
1.54846e-48	-1.20747	0.055	0.537	2.20392e-44	2	TIMP3
1.94802e-48	0.543554	0.783	0.249	2.77262e-44	2	CORO1A
1.95188e-48	-1.01862	0.272	0.694	2.77812e-44	2	TSC22D1
6.11902e-48	0.648386	0.455	0.114	8.70921e-44	2	CFD
7.59006e-48	0.596242	0.545	0.168	1.08029e-43	2	ZEB2
8.38065e-48	-1.16805	0.203	0.61	1.19282e-43	2	S100A16
3.53806e-47	0.591635	0.297	0.052	5.03572e-43	2	SHTN1
4.59065e-47	0.619465	0.966	0.633	6.53387e-43	2	S100A4
9.59025e-47	0.705371	0.597	0.262	1.36498e-42	2	STXBP2
1.23579e-46	0.719281	0.448	0.138	1.7589e-42	2	THEMIS2
1.24365e-46	0.671706	0.472	0.148	1.77008e-42	2	NAGA
1.3413e-46	0.639076	0.341	0.073	1.90907e-42	2	EMILIN2
2.10974e-46	0.537473	0.959	0.608	3.00279e-42	2	ARHGDIB
3.08325e-46	0.65468	0.79	0.485	4.38839e-42	2	BRI3
3.853e-46	0.611687	0.462	0.111	5.48397e-42	2	CCL4
3.95854e-46	-1.2325	0.059	0.514	5.6342e-42	2	TINAGL1
4.60045e-46	0.856727	0.345	0.076	6.54783e-42	2	IL4I1
1.13405e-45	0.678917	0.555	0.197	1.61409e-41	2	KCTD12
1.27174e-45	-0.857611	0.297	0.696	1.81007e-41	2	C12orf57
1.28554e-45	-1.0221	0.141	0.586	1.82971e-41	2	PRKCDBP
1.38242e-45	-1.0996	0.097	0.547	1.9676e-41	2	MDK
1.70262e-45	0.715827	0.414	0.11	2.42334e-41	2	MXD1
2.9456e-45	0.566352	0.797	0.524	4.19247e-41	2	LAMTOR2
3.43455e-45	0.691728	0.621	0.295	4.88839e-41	2	RGS19
5.99546e-45	0.74995	0.51	0.184	8.53334e-41	2	PLXDC2
6.02056e-45	0.694859	0.621	0.285	8.56907e-41	2	EFHD2
1.34391e-44	-1.00706	0.028	0.478	1.91279e-40	2	CAV2
8.11594e-44	-1.26852	0.131	0.574	1.15514e-39	2	CLU
1.65642e-43	0.695362	0.748	0.443	2.35758e-39	2	ASAH1
8.17015e-43	0.568408	0.914	0.666	1.16286e-38	2	CSTB
8.42209e-43	0.64141	0.372	0.099	1.19872e-38	2	ST14
1.05753e-42	0.555008	0.783	0.476	1.50518e-38	2	ACTR2
1.60598e-42	0.579444	0.6	0.248	2.28579e-38	2	CASP1
2.36697e-42	0.672724	0.586	0.266	3.36891e-38	2	CCDC88A
4.66825e-42	0.538099	0.448	0.134	6.64431e-38	2	FMNL1
1.22723e-41	0.584647	0.672	0.31	1.74671e-37	2	CARD16
1.2606e-41	0.54365	0.276	0.049	1.79421e-37	2	DAPP1
3.24756e-41	-0.925587	0.321	0.692	4.62225e-37	2	IGFBP4
3.9981e-41	0.596488	0.293	0.058	5.6905e-37	2	SLC15A3
9.7402e-41	-0.648647	0.617	0.751	1.38632e-36	2	DSTN
1.13261e-40	0.721241	0.493	0.188	1.61205e-36	2	RB1
4.51634e-40	0.597647	0.776	0.412	6.42811e-36	2	SLC16A3
6.45957e-40	0.568208	0.386	0.1	9.1939e-36	2	CPM
1.16937e-39	0.641783	0.621	0.304	1.66437e-35	2	SQRDL
1.40696e-39	0.790642	0.359	0.096	2.00253e-35	2	TREM1
1.41141e-39	-1.00487	0.041	0.462	2.00887e-35	2	CPE
2.77997e-39	0.627793	0.69	0.392	3.95672e-35	2	SNX2
4.22004e-39	0.623136	0.393	0.124	6.00638e-35	2	SNX8
4.40215e-39	0.613733	0.428	0.132	6.26557e-35	2	CAMK1
4.61367e-39	0.767599	0.445	0.161	6.56663e-35	2	PPIF
7.82344e-39	0.602998	0.748	0.459	1.11351e-34	2	RBPJ
8.53841e-39	0.627737	0.559	0.25	1.21527e-34	2	GNA15
1.02877e-38	0.560578	0.397	0.106	1.46424e-34	2	NFKBID
1.18104e-38	0.552834	0.776	0.496	1.68097e-34	2	BLOC1S1
1.38314e-38	-1.16436	0.176	0.576	1.96862e-34	2	MYL9
1.93984e-38	0.683468	0.383	0.111	2.76098e-34	2	RAB20
1.99066e-38	-0.8148	0.007	0.413	2.83331e-34	2	WWTR1
2.37958e-38	0.558343	0.262	0.045	3.38686e-34	2	NR4A3
4.37953e-38	-0.818806	0.069	0.486	6.23338e-34	2	PLS3
7.74899e-38	-1.04318	0.038	0.447	1.10291e-33	2	SYNE2
2.00813e-37	-0.936612	0.01	0.407	2.85817e-33	2	MAP1B
2.48625e-37	-0.983773	0.059	0.473	3.53868e-33	2	LBH
2.58795e-37	-0.870652	0.024	0.428	3.68342e-33	2	FSTL1
3.27399e-37	-1.07717	0.183	0.543	4.65987e-33	2	MFGE8
3.94665e-37	0.707089	0.434	0.162	5.61726e-33	2	PAK1
4.47351e-37	0.672476	0.393	0.126	6.36714e-33	2	B3GNT5
4.7957e-37	0.716918	0.621	0.334	6.82572e-33	2	GRINA
5.55676e-37	-0.88929	0.048	0.454	7.90893e-33	2	COL4A2
7.04829e-37	-1.25448	0.072	0.471	1.00318e-32	2	TM4SF1
1.03334e-36	0.618018	0.693	0.416	1.47075e-32	2	IFNGR1
1.10255e-36	0.539005	0.634	0.336	1.56925e-32	2	FAM96A
1.57421e-36	-0.925587	0.048	0.445	2.24057e-32	2	COL4A1
2.122e-36	0.567571	0.866	0.492	3.02024e-32	2	TGFBI
2.20626e-36	-0.691209	0.007	0.396	3.14017e-32	2	TPBG
2.24214e-36	0.79293	0.572	0.264	3.19124e-32	2	LGMN
2.66201e-36	0.5594	0.717	0.485	3.78884e-32	2	AKR1A1
4.00051e-36	0.587138	0.748	0.458	5.69393e-32	2	LAP3
6.40226e-36	-0.582965	0.597	0.809	9.11234e-32	2	LMNA
6.95346e-36	-1.15011	0.052	0.445	9.89686e-32	2	C1R
8.63724e-36	0.655315	0.576	0.248	1.22934e-31	2	ICAM1
9.82795e-36	0.567464	0.703	0.453	1.39881e-31	2	ATP6V0D1
9.96608e-36	-1.01383	0.034	0.421	1.41847e-31	2	SNCG
2.25428e-35	-0.787684	0.069	0.473	3.20852e-31	2	PKIG
2.4715e-35	-0.797099	0.062	0.452	3.51768e-31	2	SPTBN1
3.04433e-35	-0.903521	0.055	0.439	4.33299e-31	2	FHL2
3.90819e-35	0.503546	0.707	0.422	5.56252e-31	2	MOB1A
5.83938e-35	0.557113	0.428	0.148	8.31119e-31	2	NAAA
5.98325e-35	-0.772497	0.203	0.569	8.51595e-31	2	RCN1
8.13053e-35	-0.970816	0.038	0.417	1.15722e-30	2	MXRA8
1.19301e-34	-0.937686	0.086	0.48	1.69801e-30	2	NBL1
1.61675e-34	0.543964	0.493	0.183	2.30112e-30	2	PLEKHO1
2.00991e-34	0.711588	0.607	0.306	2.8607e-30	2	SGK1
2.01668e-34	-0.665817	0.024	0.406	2.87034e-30	2	CTTN
2.99737e-34	0.54252	0.359	0.101	4.26615e-30	2	P2RY6
4.34515e-34	-0.707643	0.014	0.388	6.18445e-30	2	A4GALT
5.7503e-34	0.655449	0.655	0.376	8.1844e-30	2	BLVRB
9.2473e-34	-0.687166	0.024	0.399	1.31617e-29	2	TJP1
9.26555e-34	-0.830095	0.007	0.376	1.31877e-29	2	TFPI
9.33888e-34	0.686202	0.459	0.189	1.3292e-29	2	PGD
9.47632e-34	-0.770133	0.024	0.399	1.34876e-29	2	TGFB1I1
1.80023e-33	-0.701669	0.355	0.669	2.56227e-29	2	PRDX2
1.80677e-33	-0.869221	0.021	0.393	2.57158e-29	2	AKAP12
1.92727e-33	0.692529	0.521	0.248	2.74309e-29	2	ALCAM
2.84289e-33	0.593941	0.552	0.217	4.04629e-29	2	ZNF331
3.37229e-33	-0.856755	0.038	0.413	4.79978e-29	2	CSRP2
3.95648e-33	0.706535	0.597	0.333	5.63126e-29	2	NINJ1
7.67662e-33	-0.952438	0.021	0.381	1.09261e-28	2	SDC1
8.56267e-33	-0.813941	0.031	0.401	1.21873e-28	2	DKK3
1.0157e-32	0.549502	0.703	0.402	1.44565e-28	2	CHCHD10
1.60031e-32	-0.814635	0.069	0.44	2.27773e-28	2	CFH
1.64859e-32	0.74224	0.434	0.165	2.34643e-28	2	GCHFR
1.66772e-32	0.524877	0.462	0.176	2.37366e-28	2	MIF4GD
2.42284e-32	-0.907195	0.228	0.568	3.44843e-28	2	ID1
2.43813e-32	-1.06062	0.066	0.431	3.47019e-28	2	CTGF
2.65277e-32	-0.780089	0.193	0.559	3.77569e-28	2	EMP1
2.72634e-32	0.593803	0.652	0.397	3.88041e-28	2	PEA15
3.71605e-32	-1.08947	0.128	0.471	5.28905e-28	2	PERP
4.67229e-32	0.520202	0.393	0.136	6.65007e-28	2	HACD4
4.91197e-32	-0.730017	0.024	0.385	6.9912e-28	2	GJA1
5.34072e-32	0.50082	0.679	0.401	7.60144e-28	2	CNPY3
6.16107e-32	-0.703604	0.024	0.38	8.76906e-28	2	TUSC3
8.18351e-32	0.556641	0.703	0.455	1.16476e-27	2	MGAT1
9.07185e-32	0.508337	0.707	0.452	1.2912e-27	2	ATP6AP1
1.02797e-31	-0.716253	0.031	0.396	1.46311e-27	2	BACE2
1.07427e-31	-1.04755	0.172	0.502	1.529e-27	2	CTHRC1
2.03629e-31	0.554416	0.641	0.368	2.89825e-27	2	TPP1
3.65957e-31	-0.632361	0.014	0.364	5.20867e-27	2	PFN2
4.27471e-31	-0.673491	0.034	0.39	6.0842e-27	2	LAMB1
4.30232e-31	-0.700323	0.103	0.469	6.12349e-27	2	PPFIBP1
5.16731e-31	-1.19996	0.131	0.474	7.35463e-27	2	COL1A1
6.35185e-31	-0.901221	0.034	0.388	9.04059e-27	2	HSPG2
6.99381e-31	0.650787	0.379	0.133	9.95429e-27	2	NUP214
7.41621e-31	0.522858	0.341	0.106	1.05555e-26	2	HVCN1
8.52359e-31	-1.4234	0.1	0.44	1.21316e-26	2	SPARCL1
1.22554e-30	-0.645338	0.007	0.35	1.74431e-26	2	EHD2
1.42409e-30	0.524985	0.666	0.382	2.02691e-26	2	RNF13
1.49452e-30	0.527888	0.434	0.169	2.12715e-26	2	NFKBIE
1.75625e-30	-1.2935	0.172	0.509	2.49967e-26	2	MGP
2.58699e-30	0.595412	0.617	0.328	3.68206e-26	2	AP1S2
3.13339e-30	-0.654955	0.017	0.364	4.45975e-26	2	RAI14
4.18609e-30	-1.07326	0.048	0.394	5.95806e-26	2	IGFBP5
4.75436e-30	0.507572	0.269	0.068	6.76688e-26	2	RBM47
5.95814e-30	-0.889844	0.228	0.566	8.48022e-26	2	SELM
7.00795e-30	-0.547771	0.572	0.747	9.97441e-26	2	ITGB1
7.24192e-30	-0.81317	0.11	0.474	1.03074e-25	2	IFITM1
9.14499e-30	0.534228	0.297	0.082	1.30161e-25	2	BMP2K
9.48081e-30	-0.602785	0.007	0.339	1.3494e-25	2	MDFI
9.70806e-30	-0.677543	0.007	0.339	1.38175e-25	2	FBN1
1.0991e-29	0.637422	0.534	0.28	1.56435e-25	2	GAA
1.16945e-29	-0.814869	0.007	0.339	1.66448e-25	2	PALMD
1.19876e-29	-0.626949	0.01	0.344	1.7062e-25	2	NDFIP2
1.21633e-29	-0.883245	0.038	0.382	1.7312e-25	2	C10orf10
1.28981e-29	-0.629442	0.066	0.425	1.83579e-25	2	FAM114A1
1.35453e-29	-0.67447	0.021	0.36	1.9279e-25	2	MAST4
1.65126e-29	0.650624	0.383	0.133	2.35024e-25	2	GADD45G
2.11131e-29	0.643265	0.548	0.29	3.00502e-25	2	BID
3.20575e-29	0.594738	0.462	0.201	4.56274e-25	2	GLA
3.79703e-29	-0.704252	0.21	0.539	5.40431e-25	2	LIMA1
5.10949e-29	0.529788	0.538	0.227	7.27234e-25	2	C1orf54
6.22811e-29	0.618846	0.41	0.157	8.86447e-25	2	RIPK2
7.01014e-29	-0.586101	0.003	0.326	9.97753e-25	2	LARP6
7.81113e-29	0.587747	0.431	0.184	1.11176e-24	2	MCOLN1
8.65828e-29	-0.674864	0.01	0.337	1.23233e-24	2	MALL
1.0538e-28	0.585024	0.479	0.229	1.49987e-24	2	LACTB
1.27761e-28	-0.855651	0.079	0.412	1.81842e-24	2	IGFBP6
1.54494e-28	0.522141	0.61	0.351	2.19891e-24	2	EIF4EBP1
1.72735e-28	-0.796884	0.224	0.552	2.45854e-24	2	PHLDA1
1.94595e-28	-0.849796	0.041	0.376	2.76967e-24	2	LHFP
2.07078e-28	-0.589636	0	0.317	2.94735e-24	2	TBX3
2.58812e-28	-1.09366	0.124	0.463	3.68368e-24	2	COL1A2
2.98152e-28	0.561391	0.31	0.095	4.24359e-24	2	GM2A
4.06781e-28	-0.912905	0.276	0.541	5.78971e-24	2	OCIAD2
4.62209e-28	-0.657497	0.179	0.537	6.57862e-24	2	EMP2
6.97428e-28	0.511862	0.6	0.322	9.92649e-24	2	EPSTI1
7.51592e-28	0.533482	0.324	0.1	1.06974e-23	2	TNFAIP2
1.04532e-27	-0.804587	0.052	0.378	1.48781e-23	2	ITGA6
1.27817e-27	0.536695	0.621	0.323	1.81921e-23	2	PLIN2
1.29448e-27	-0.789692	0.034	0.359	1.84243e-23	2	SRPX
1.53116e-27	-0.550845	0.017	0.338	2.1793e-23	2	PARVA
1.72943e-27	-0.636531	0.028	0.352	2.46149e-23	2	ECE1
2.57773e-27	-0.628548	0.014	0.331	3.66888e-23	2	LTBP1
2.80871e-27	-0.551909	0.017	0.337	3.99764e-23	2	LAMC1
2.86086e-27	-0.733143	0.01	0.323	4.07186e-23	2	NFIB
4.04514e-27	-0.90171	0.059	0.381	5.75745e-23	2	COL6A1
4.09473e-27	-0.598858	0.021	0.34	5.82803e-23	2	TPST1
4.78716e-27	-0.808267	0.028	0.345	6.81356e-23	2	PLAT
5.10727e-27	-0.859297	0.003	0.31	7.26918e-23	2	ARHGAP29
5.23055e-27	-0.636187	0.352	0.668	7.44464e-23	2	SERPINH1
6.04318e-27	-0.726482	0.066	0.398	8.60126e-23	2	MYLK
6.1128e-27	-0.551894	0.028	0.351	8.70035e-23	2	MYO6
6.14072e-27	-1.08991	0.052	0.374	8.74008e-23	2	TRBC2
6.70539e-27	-0.639753	0.066	0.396	9.54378e-23	2	PHLDA3
1.04882e-26	0.511546	0.324	0.111	1.49278e-22	2	RPS6KA1
1.05736e-26	-0.973273	0.052	0.36	1.50495e-22	2	PTN
1.16498e-26	-0.762218	0.028	0.346	1.65811e-22	2	CRYAB
1.33716e-26	-0.697125	0.083	0.413	1.90318e-22	2	FKBP11
1.49904e-26	0.510098	0.6	0.343	2.13359e-22	2	IDH2
1.77276e-26	0.577244	0.445	0.211	2.52318e-22	2	AP1B1
1.82659e-26	0.61125	0.559	0.313	2.59979e-22	2	DAB2
1.91663e-26	-0.512476	0.017	0.328	2.72793e-22	2	RBFOX2
1.9232e-26	0.505078	0.369	0.125	2.73729e-22	2	MAP3K8
1.99038e-26	-0.566353	0.01	0.317	2.83291e-22	2	PLOD2
2.16767e-26	0.537771	0.648	0.345	3.08524e-22	2	HSPA6
3.6689e-26	0.552022	0.452	0.217	5.22195e-22	2	DSE
3.78685e-26	0.553405	0.455	0.189	5.38982e-22	2	NDRG2
4.66709e-26	-0.640618	0.341	0.611	6.64267e-22	2	MAGED2
6.03919e-26	0.575295	0.328	0.11	8.59558e-22	2	PRMT9
7.00099e-26	0.568519	0.397	0.166	9.96451e-22	2	SOAT1
8.07486e-26	-0.598817	0.086	0.414	1.1493e-21	2	PRAF2
9.67929e-26	-1.32491	0.034	0.341	1.37765e-21	2	TRAC
9.7162e-26	0.518328	0.421	0.182	1.38291e-21	2	ITPR2
1.08904e-25	-0.749049	0.038	0.34	1.55004e-21	2	COL12A1
1.10134e-25	-0.751195	0.266	0.592	1.56753e-21	2	ARID5B
1.10398e-25	-0.801833	0.038	0.346	1.5713e-21	2	CCDC80
1.20237e-25	-0.623232	0.031	0.346	1.71134e-21	2	CAMK2N1
1.2115e-25	-0.650284	0.038	0.348	1.72432e-21	2	C9orf3
1.27729e-25	0.575953	0.503	0.257	1.81796e-21	2	SLC31A2
1.3945e-25	-0.730991	0.114	0.426	1.98479e-21	2	PDLIM4
1.63235e-25	-0.511426	0.003	0.296	2.32333e-21	2	TSPAN9
1.97604e-25	-0.524822	0.021	0.321	2.8125e-21	2	SGCB
2.35114e-25	-0.542655	0.024	0.328	3.34638e-21	2	GPX8
2.36977e-25	-0.645313	0.107	0.448	3.37289e-21	2	OPTN
2.47399e-25	-0.634848	0.038	0.339	3.52122e-21	2	KDELR3
2.53807e-25	0.592643	0.452	0.228	3.61243e-21	2	UNC93B1
2.75961e-25	-0.552154	0.014	0.309	3.92776e-21	2	BCAR1
3.58016e-25	-0.627435	0.017	0.313	5.09564e-21	2	RBPMS
3.64866e-25	-0.71401	0.052	0.368	5.19313e-21	2	SLC9A3R2
3.71546e-25	-0.560635	0.079	0.404	5.28821e-21	2	CKAP4
3.8559e-25	-0.532527	0.017	0.315	5.48811e-21	2	TMEM54
4.70638e-25	-0.968319	0.145	0.429	6.69859e-21	2	KRT18
4.83117e-25	-0.567933	0.028	0.327	6.8762e-21	2	RHOD
6.72635e-25	-0.963552	0.066	0.373	9.57362e-21	2	FBLN1
6.83261e-25	-0.660052	0.014	0.306	9.72486e-21	2	FAP
6.91436e-25	-0.789303	0.334	0.581	9.8412e-21	2	TPM1
7.80183e-25	0.568272	0.397	0.175	1.11043e-20	2	ZNF385A
7.88438e-25	-0.727455	0.003	0.289	1.12218e-20	2	NR2F2
7.92902e-25	0.514653	0.562	0.32	1.12854e-20	2	RNF149
9.29941e-25	0.638847	0.6	0.346	1.32359e-20	2	KLF4
1.00236e-24	-0.541923	0.003	0.289	1.42666e-20	2	LOXL2
2.2573e-24	-0.569345	0.021	0.312	3.21281e-20	2	GLT8D2
2.36872e-24	0.640842	0.355	0.146	3.3714e-20	2	ATF5
3.56757e-24	0.637377	0.441	0.209	5.07772e-20	2	TCOF1
3.66631e-24	-0.552546	0.038	0.338	5.21826e-20	2	CHPF
4.36305e-24	-0.652272	0.028	0.323	6.20993e-20	2	COL8A1
8.06569e-24	-0.681666	0.014	0.296	1.14799e-19	2	COL5A2
8.43197e-24	-0.60993	0.231	0.554	1.20012e-19	2	SOX4
8.90513e-24	-0.549749	0.024	0.317	1.26747e-19	2	TMEM98
1.08855e-23	-0.575774	0.148	0.473	1.54933e-19	2	VGLL4
1.34984e-23	0.883107	0.469	0.233	1.92122e-19	2	RNASE1
1.49696e-23	-0.688783	0.038	0.324	2.13062e-19	2	ITGB4
1.53089e-23	-0.562933	0.424	0.662	2.17892e-19	2	APP
1.91927e-23	-0.636562	0.038	0.331	2.7317e-19	2	VWA1
2.30288e-23	-0.557231	0.062	0.36	3.27769e-19	2	FKBP9
2.33414e-23	-0.902628	0.031	0.314	3.32219e-19	2	C8orf4
3.0787e-23	-0.787979	0.021	0.299	4.38191e-19	2	COL18A1
3.52102e-23	-0.630351	0.024	0.304	5.01147e-19	2	ITGA2
3.97688e-23	-0.503904	0.641	0.851	5.66029e-19	2	IFITM2
5.24498e-23	-0.707577	0.283	0.526	7.46518e-19	2	FAM3C
5.56559e-23	-0.636123	0.172	0.481	7.9215e-19	2	FSCN1
6.68397e-23	-0.630239	0.024	0.303	9.5133e-19	2	EFEMP1
9.29069e-23	-0.511815	0.01	0.28	1.32234e-18	2	STRA6
9.71558e-23	-0.50493	0.024	0.304	1.38282e-18	2	SNAI2
1.14807e-22	-0.619667	0.145	0.462	1.63404e-18	2	ODF2L
1.33369e-22	-0.518515	0.007	0.274	1.89825e-18	2	SERTAD4-AS1
1.84936e-22	-0.897941	0.107	0.376	2.6322e-18	2	KRT8
2.06161e-22	-0.736366	0.017	0.284	2.93428e-18	2	TSHZ2
2.34248e-22	-0.782283	0.048	0.321	3.33406e-18	2	DCBLD2
2.40215e-22	-0.573477	0.024	0.299	3.41898e-18	2	FERMT2
2.54315e-22	0.516877	0.376	0.163	3.61967e-18	2	TMEM51
2.68688e-22	-0.732123	0.01	0.273	3.82424e-18	2	FKBP10
2.72119e-22	-0.507333	0.017	0.289	3.87307e-18	2	TPD52L1
3.09582e-22	-0.820842	0.145	0.421	4.40628e-18	2	PMEPA1
3.25078e-22	0.540977	0.659	0.42	4.62683e-18	2	NAMPT
3.39922e-22	-0.810773	0.079	0.357	4.83811e-18	2	SERPINE2
3.73219e-22	-1.02775	0.059	0.331	5.31202e-18	2	COL6A2
3.93124e-22	-0.501553	0.01	0.273	5.59533e-18	2	EVA1A
4.08545e-22	-0.510542	0.024	0.296	5.81483e-18	2	EDNRA
5.33395e-22	-0.527581	0.072	0.364	7.59181e-18	2	MAGED1
6.04982e-22	-0.508809	0.031	0.307	8.61071e-18	2	ENAH
6.69764e-22	-0.678645	0.162	0.464	9.53274e-18	2	HTRA1
6.91256e-22	-0.733514	0.028	0.292	9.83865e-18	2	CFI
7.50171e-22	-0.57619	0.031	0.306	1.06772e-17	2	FBXO32
7.86334e-22	-1.09575	0.055	0.322	1.11919e-17	2	BGN
1.29656e-21	-0.570369	0.041	0.314	1.8454e-17	2	LSR
1.52032e-21	-1.02977	0.045	0.311	2.16388e-17	2	C1S
1.88464e-21	-0.624735	0.314	0.549	2.68241e-17	2	CALU
2.35149e-21	-0.552085	0.293	0.588	3.34687e-17	2	PPIC
2.48807e-21	-0.764911	0.052	0.319	3.54127e-17	2	CAPS
2.51141e-21	-0.544427	0.107	0.413	3.57449e-17	2	NET1
2.86476e-21	-0.70106	0.055	0.328	4.07742e-17	2	NT5E
3.43482e-21	-0.711991	0.093	0.382	4.88877e-17	2	MMP2
3.52333e-21	-0.840602	0.224	0.468	5.01476e-17	2	TNFRSF12A
3.98742e-21	-0.605494	0.021	0.283	5.67529e-17	2	IGF2
4.83859e-21	-0.5221	0.024	0.283	6.88676e-17	2	KIZ
4.89654e-21	-0.576033	0.01	0.261	6.96925e-17	2	PKP3
5.48908e-21	-0.521994	0.021	0.28	7.81261e-17	2	DSP
6.73881e-21	0.513044	0.459	0.23	9.59135e-17	2	DPYSL2
7.09364e-21	-0.906768	0.069	0.336	1.00964e-16	2	NPDC1
7.54789e-21	-0.538899	0.024	0.285	1.07429e-16	2	LOXL1
9.43241e-21	-0.567023	0.331	0.608	1.34251e-16	2	MARCKSL1
1.26149e-20	-0.722997	0.031	0.291	1.79548e-16	2	COL6A3
1.33857e-20	-1.05958	0.034	0.289	1.90518e-16	2	SPRY1
1.46897e-20	-0.609061	0.017	0.268	2.09079e-16	2	TSPAN1
1.53798e-20	-0.580113	0.01	0.257	2.18901e-16	2	TNC
1.63149e-20	-0.913673	0.021	0.268	2.3221e-16	2	BCAM
1.63832e-20	0.810589	0.303	0.114	2.33182e-16	2	PLAC8
2.07903e-20	-0.795437	0.11	0.389	2.95908e-16	2	TUBA4A
3.25495e-20	-0.846194	0.083	0.341	4.63278e-16	2	SLC14A1
3.36617e-20	0.516233	0.503	0.305	4.79107e-16	2	ADPGK
3.50437e-20	0.75878	0.497	0.301	4.98777e-16	2	GPNMB
3.65947e-20	-0.522698	0.334	0.59	5.20852e-16	2	REXO2
4.10836e-20	-0.556823	0.017	0.263	5.84742e-16	2	FERMT1
4.33112e-20	-0.549623	0.024	0.275	6.16448e-16	2	LAMA4
5.33434e-20	-0.747333	0.066	0.316	7.59236e-16	2	ITGA3
6.43608e-20	-0.503407	0.028	0.278	9.16047e-16	2	SPOCK1
6.56541e-20	-1.02571	0.028	0.271	9.34455e-16	2	ITM2A
6.82364e-20	-0.763051	0.055	0.306	9.71208e-16	2	CLDN4
9.21594e-20	-0.695636	0.052	0.307	1.31171e-15	2	LMCD1
9.39886e-20	-0.516625	0.034	0.287	1.33774e-15	2	MLPH
1.10333e-19	-0.51815	0.117	0.401	1.57037e-15	2	UACA
1.29869e-19	-0.52455	0.124	0.402	1.84842e-15	2	AK1
2.45959e-19	-0.577822	0.041	0.29	3.50073e-15	2	LAPTM4B
3.00522e-19	-0.511972	0.097	0.374	4.27733e-15	2	GSTM3
3.25919e-19	-0.724269	0.028	0.271	4.6388e-15	2	TSPAN7
4.05457e-19	-0.51006	0.155	0.44	5.77087e-15	2	DST
5.14711e-19	-0.520839	0.09	0.361	7.32589e-15	2	MGLL
5.67872e-19	-0.510776	0.148	0.44	8.08252e-15	2	GADD45A
6.05276e-19	-0.552777	0.038	0.285	8.61489e-15	2	HEG1
6.38473e-19	-0.538867	0.345	0.566	9.08738e-15	2	ACTN4
6.43634e-19	-0.858576	0.066	0.314	9.16085e-15	2	THY1
6.95725e-19	-0.544095	0.083	0.342	9.90226e-15	2	CTNNAL1
8.91707e-19	0.517628	0.434	0.229	1.26917e-14	2	DNAJA4
1.08658e-18	-0.637631	0.048	0.293	1.54653e-14	2	COL7A1
1.27953e-18	-0.586857	0.452	0.605	1.82116e-14	2	S100A13
1.56674e-18	-0.557143	0.303	0.532	2.22994e-14	2	ARPC1A
1.75768e-18	-0.634589	0.021	0.253	2.5017e-14	2	EFEMP2
1.81922e-18	-0.943845	0.221	0.435	2.58929e-14	2	KRT17
2.42988e-18	-0.646169	0.159	0.425	3.45845e-14	2	C12orf75
2.47392e-18	0.587503	0.269	0.106	3.52113e-14	2	PKIB
2.48328e-18	-0.642379	0.062	0.306	3.53446e-14	2	SERPINE1
4.77752e-18	0.507609	0.445	0.248	6.79984e-14	2	SCO2
7.92601e-18	-0.611245	0.145	0.418	1.12811e-13	2	HYAL2
8.64465e-18	-0.888445	0.041	0.268	1.23039e-13	2	PCOLCE
1.00287e-17	0.50589	0.655	0.477	1.42738e-13	2	IER3
1.30888e-17	-0.501846	0.059	0.305	1.86293e-13	2	RAMP1
1.40002e-17	-0.631204	0.041	0.275	1.99265e-13	2	GJB2
2.15814e-17	-0.509734	0.031	0.259	3.07169e-13	2	ZEB1
2.80569e-17	-0.507321	0.045	0.28	3.99334e-13	2	SYTL1
4.08628e-17	-0.790941	0.034	0.256	5.816e-13	2	IGFBP3
5.8181e-17	-0.849406	0.041	0.261	8.28091e-13	2	HOPX
5.99507e-17	-0.524854	0.117	0.37	8.53278e-13	2	PALLD
9.10009e-17	-0.657068	0.034	0.254	1.29522e-12	2	PDLIM3
1.09909e-16	0.549347	0.293	0.131	1.56434e-12	2	LHFPL2
1.16589e-16	-0.594182	0.066	0.291	1.65941e-12	2	C19orf33
1.44243e-16	-0.75648	0.038	0.255	2.05301e-12	2	C11orf96
1.52245e-16	0.64922	0.6	0.511	2.1669e-12	2	CTSL
3.76792e-16	-0.762117	0.052	0.271	5.36287e-12	2	IGFBP2
4.69295e-16	-0.744383	0.076	0.294	6.67948e-12	2	KRT5
5.59181e-16	0.554097	0.621	0.496	7.95883e-12	2	PLD3
7.17221e-16	-0.620999	0.048	0.265	1.02082e-11	2	DHRS2
7.65045e-16	-0.816173	0.141	0.376	1.08889e-11	2	TPM2
8.20957e-16	-0.777768	0.069	0.285	1.16847e-11	2	CXCL14
9.92123e-16	-0.573991	0.048	0.264	1.41209e-11	2	SLPI
1.35068e-15	-0.518267	0.09	0.325	1.92243e-11	2	SLC38A1
1.47631e-15	-0.573414	0.059	0.275	2.10124e-11	2	ANGPTL4
1.57508e-15	-0.746895	0.103	0.314	2.24181e-11	2	SFN
2.13253e-15	-0.502032	0.1	0.334	3.03523e-11	2	LXN
3.39953e-15	0.925021	0.383	0.225	4.83855e-11	2	G0S2
4.44147e-15	-0.625564	0.131	0.36	6.32154e-11	2	EPAS1
8.24028e-15	-0.971129	0.062	0.263	1.17284e-10	2	AQP1
9.7147e-15	-0.558493	0.107	0.329	1.38269e-10	2	PLPP1
1.24517e-14	-0.924767	0.148	0.371	1.77225e-10	2	LUM
1.40132e-14	-0.846646	0.293	0.513	1.9945e-10	2	IL32
1.42426e-14	-0.500168	0.314	0.552	2.02714e-10	2	RDX
1.68327e-14	-0.524938	0.214	0.459	2.39579e-10	2	ANXA6
1.8971e-14	-1.0344	0.21	0.417	2.70014e-10	2	TAGLN
3.16496e-14	0.535833	0.428	0.255	4.50469e-10	2	HBEGF
3.22819e-14	-0.896089	0.272	0.436	4.59468e-10	2	KRT19
3.27268e-14	0.569267	0.341	0.163	4.65801e-10	2	CCL2
7.77356e-14	-0.948408	0.169	0.385	1.10641e-09	2	ACTA2
8.01336e-14	-0.540638	0.062	0.261	1.14054e-09	2	CD320
9.41314e-14	0.674564	0.307	0.154	1.33977e-09	2	SLC40A1
1.1141e-13	-0.526581	0.176	0.378	1.5857e-09	2	HRAS
1.15255e-13	-0.741824	0.086	0.278	1.64042e-09	2	TNFRSF11B
3.3685e-13	-0.577333	0.29	0.492	4.79438e-09	2	STK17A
3.98455e-13	-0.658156	0.09	0.278	5.67121e-09	2	TFPI2
4.87784e-13	-0.846061	0.076	0.261	6.94263e-09	2	POSTN
1.04995e-12	-0.812874	0.248	0.411	1.4944e-08	2	KRT7
1.54122e-12	-0.961483	0.103	0.287	2.19362e-08	2	COL3A1
1.75552e-12	-0.740775	0.145	0.323	2.49863e-08	2	LAMC2
2.17115e-12	-1.01088	0.083	0.262	3.0902e-08	2	DCN
6.88473e-11	-0.510816	0.203	0.366	9.79904e-07	2	CCND1
1.48441e-10	-0.529972	0.134	0.318	2.11276e-06	2	PBXIP1
2.00716e-10	-0.536143	0.141	0.317	2.8568e-06	2	ITM2C
4.34458e-10	-0.597054	0.183	0.359	6.18365e-06	2	NCOA7
5.37093e-09	-0.538531	0.141	0.3	7.64445e-05	2	MYC
1.1264e-277	1.58209	0.735	0.013	1.60321e-273	3	SELP
2.70083e-268	1.9824	0.927	0.066	3.84409e-264	3	VWF
1.2674e-264	2.45636	1	0.109	1.80389e-260	3	ACKR1
6.62615e-252	1.61105	0.675	0.013	9.43101e-248	3	CCL14
7.33197e-246	1.82633	0.944	0.079	1.04356e-241	3	RAMP3
1.20941e-244	1.69628	0.906	0.066	1.72136e-240	3	EMCN
2.35902e-244	1.72178	0.949	0.079	3.35759e-240	3	ECSCR
7.83328e-228	1.5555	0.782	0.046	1.11491e-223	3	ZNF385D
3.18795e-227	1.71838	0.944	0.088	4.53741e-223	3	PLVAP
1.17336e-209	1.80745	0.979	0.14	1.67005e-205	3	AQP1
2.21802e-209	1.52434	0.739	0.046	3.1569e-205	3	IL33
5.0821e-190	1.62905	0.658	0.037	7.23336e-186	3	ADM5
1.31278e-187	1.70096	0.91	0.151	1.86848e-183	3	TSPAN7
2.66512e-187	1.81926	0.944	0.166	3.79327e-183	3	SPRY1
8.61715e-187	1.43494	0.808	0.077	1.22648e-182	3	ADGRL4
4.21099e-186	1.50202	0.731	0.058	5.99351e-182	3	FAM167B
1.79788e-182	1.49725	0.859	0.097	2.55892e-178	3	EGFL7
1.3099e-181	1.36976	0.688	0.049	1.86439e-177	3	NOSTRIN
9.22948e-181	1.58698	0.564	0.021	1.31363e-176	3	SELE
6.98127e-178	1.5339	0.906	0.117	9.93644e-174	3	RAMP2
2.08694e-176	1.56571	0.915	0.142	2.97035e-172	3	PECAM1
3.77855e-176	1.4379	0.812	0.083	5.37801e-172	3	CLEC14A
7.04597e-176	1.34188	0.714	0.056	1.00285e-171	3	CALCRL
4.16612e-173	1.54154	0.761	0.069	5.92965e-169	3	CLDN5
1.69477e-171	1.28889	0.59	0.03	2.41217e-167	3	CPXM2
7.568e-169	1.08389	0.453	0.007	1.07715e-164	3	RAB3C
5.63229e-168	1.33286	0.667	0.052	8.01643e-164	3	CXorf36
9.70763e-168	1.26335	0.684	0.054	1.38169e-163	3	PCAT19
1.16782e-167	1.49788	0.726	0.071	1.66216e-163	3	ADAMTS9
2.63003e-166	1.33207	0.585	0.033	3.74332e-162	3	OLFM1
8.95424e-162	1.35726	0.479	0.014	1.27446e-157	3	C2CD4B
4.25617e-159	1.28821	0.641	0.051	6.05781e-155	3	TGFBR3
2.57744e-154	1.51756	0.94	0.217	3.66847e-150	3	NPDC1
6.69606e-153	1.08944	0.406	0.005	9.53051e-149	3	MMRN1
2.21298e-151	1.35913	0.791	0.112	3.14973e-147	3	CD93
2.69484e-150	1.16715	0.556	0.033	3.83557e-146	3	MYCT1
3.77008e-148	1.24812	0.667	0.066	5.36595e-144	3	MMRN2
1.98099e-146	1.21111	0.671	0.063	2.81954e-142	3	CD34
4.52709e-144	1.19917	0.581	0.042	6.44341e-140	3	PCDH17
1.85786e-139	1.27318	0.688	0.081	2.64429e-135	3	JAM2
2.05103e-139	1.33297	0.791	0.122	2.91923e-135	3	COL15A1
2.14665e-139	1.45584	0.996	0.316	3.05533e-135	3	SPARCL1
5.97956e-139	1.35282	0.509	0.03	8.5107e-135	3	CCL23
2.49888e-138	1.12854	0.483	0.024	3.55666e-134	3	MEOX1
2.1059e-134	1.52272	0.966	0.345	2.99732e-130	3	TM4SF1
4.14263e-133	1.38083	0.679	0.091	5.8962e-129	3	SLCO2A1
2.28765e-128	1.27959	0.726	0.12	3.25601e-124	3	TMEM255B
2.67841e-128	1.19728	0.658	0.078	3.81219e-124	3	IL3RA
7.32005e-126	1.11043	0.632	0.07	1.04186e-121	3	CYYR1
1.10217e-125	1.46525	0.936	0.377	1.56872e-121	3	PRCP
1.3639e-124	1.25736	0.641	0.078	1.94124e-120	3	SDPR
1.40755e-123	1.22321	0.564	0.055	2.00336e-119	3	NRN1
1.20243e-118	1.00745	0.487	0.035	1.71141e-114	3	TM4SF18
1.56164e-118	1.15919	0.765	0.121	2.22269e-114	3	ESAM
7.47989e-118	1.52353	0.859	0.268	1.06461e-113	3	NCOA7
1.13416e-116	1.09337	0.547	0.054	1.61425e-112	3	THSD7A
6.80225e-115	1.28354	0.829	0.225	9.68164e-111	3	PALMD
2.21549e-113	1.29856	0.923	0.363	3.15331e-109	3	ENG
2.68322e-110	1.1546	0.88	0.188	3.81903e-106	3	RNASE1
3.35163e-110	1.17719	0.526	0.05	4.77037e-106	3	C7
3.95979e-108	1.02534	0.432	0.03	5.63597e-104	3	FAM110D
1.43292e-105	1.26669	0.85	0.273	2.03947e-101	3	HSPG2
1.78311e-103	1.22509	0.85	0.262	2.5379e-99	3	EPAS1
6.06935e-103	1.03561	0.97	0.482	8.63851e-99	3	GNG11
7.12119e-102	1.07685	0.996	0.514	1.01356e-97	3	IFI27
1.56286e-101	0.697312	0.991	0.771	2.22442e-97	3	FKBP1A
1.58272e-100	1.04088	0.953	0.534	2.25268e-96	3	PDLIM1
1.76933e-100	0.953511	0.483	0.049	2.51829e-96	3	ERG
1.36745e-99	0.695655	0.265	0.003	1.94629e-95	3	CADM3-AS1
1.42592e-97	0.96066	0.496	0.052	2.02951e-93	3	CDH5
2.4447e-97	1.05347	0.791	0.163	3.47953e-93	3	BCAM
1.62684e-95	0.774033	1	0.733	2.31548e-91	3	IGFBP7
6.61992e-94	1.08731	0.932	0.334	9.42214e-90	3	A2M
1.15416e-92	1.15597	0.949	0.456	1.64271e-88	3	CLU
4.10664e-92	1.08438	0.739	0.194	5.84498e-88	3	CFI
7.77576e-92	1.18194	0.756	0.205	1.10672e-87	3	ARHGAP29
1.25717e-91	1.01299	0.423	0.039	1.78932e-87	3	CYTL1
[truncated: 4,622 more rows]
