# Supplementary material for: Development and validation of an intra-tumor heterogeneity-related signature to predict prognosis of bladder cancer: a study based on single-cell RNA-seq
Source: Aging (Albany NY). 2021 Aug 2;13(15):19415–41. doi: 10.18632/aging.203353 (PMC8386527; doi:10.18632/aging.203353)
Supplement: Supplementary Table 4 [file aging-13-203353-s005.xls]

## Sheet: MATH.cor
Supplementary Table 4. The spearman correlation coefficients of 2940 cell markers to MATH values.
gene	spearman_cor	pvalue
CD3D	-0.159	0.00133538
GZMA	-0.186	0.000164358
CD3E	-0.15	0.00255441
CCL5	-0.056	0.261752
CD2	-0.158	0.00144891
GZMK	-0.121	0.0147434
TRAC	-0.134	0.00706693
CD52	-0.137	0.00590244
PTPRC	-0.136	0.00619994
TRBC1	-0.136	0.00616355
CXCR4	-0.141	0.00441506
IL32	-0.052	0.292978
TMSB4X	-0.18	0.000274476
RPL28	-0.132	0.00796648
RPS15A	-0.212	1.63e-05
RPS27	-0.056	0.263313
B2M	-0.2	4.94e-05
RPL23A	-0.107	0.0319954
RPL13A	-0.23	3e-06
RPS29	-0.196	7.4e-05
RPL10	-0.255	2.03e-07
RPLP2	-0.237	1.37e-06
RPL27A	-0.323	2.66e-11
HLA-C	-0.043	0.38429
MALAT1	-0.03	0.543327
RPS3	-0.205	3.33e-05
RPS12	-0.209	2.15e-05
HLA-B	-0.106	0.032442
RPL13	-0.219	8.59e-06
RPS2	-0.27	3.39e-08
RPL30	0.011	0.832874
RPS27A	-0.118	0.017071
CORO1A	-0.122	0.0140073
RPS19	-0.13	0.00907197
RPS15	-0.19	0.00012117
RPL21	-0.152	0.00215355
NKG7	-0.146	0.00320128
HLA-A	-0.184	0.000192317
RPS16	-0.039	0.429733
RPL41	-0.131	0.00836047
KLRB1	-0.206	3.05e-05
RPS25	-0.176	0.000381615
RPL19	-0.168	0.000691549
BTG1	-0.192	9.93e-05
RPS20	-0.145	0.00348098
LCK	-0.12	0.0154832
RPS18	-0.167	0.000720945
RPL18A	-0.226	4.43e-06
RPL34	-0.29	2.61e-09
HSP90AA1	0.07	0.157032
EIF1	-0.059	0.237744
RPS7	-0.051	0.303508
RPS14	-0.251	2.96e-07
RPL31	-0.16	0.00120428
RPL14	-0.201	4.57e-05
RPSA	-0.222	6.58e-06
CD48	-0.124	0.0121662
RPS26	-0.138	0.00553304
RPS6	-0.148	0.00277471
RPL35A	-0.118	0.0173731
RPS3A	-0.222	6.19e-06
RPL39	-0.139	0.00506746
RPL3	-0.303	4.96e-10
RPL18	-0.119	0.0161811
HCST	-0.112	0.0243905
RPL9	-0.224	5.41e-06
FAU	-0.216	1.15e-05
GSN	0.016	0.75456
RPL6	-0.225	4.71e-06
IFNG	-0.082	0.101324
UBB	-0.151	0.00235999
CD8A	-0.097	0.0522687
HSPA8	0.019	0.700937
CD3G	-0.113	0.0225687
CST7	-0.118	0.0174587
CD7	-0.126	0.0112491
DNAJB1	0.065	0.190426
CD69	-0.126	0.0110124
GRN	-0.088	0.0769849
RAB13	-0.093	0.0627655
RPL37	-0.041	0.405259
TRAT1	-0.134	0.00675799
GZMM	-0.099	0.045472
LTB	-0.144	0.00361726
CST3	-0.132	0.00783486
DDX5	-0.091	0.0679078
APP	0.022	0.663111
EEF1D	-0.009	0.863279
GZMH	-0.149	0.00259267
CD59	-0.14	0.0046797
IFITM3	-0.12	0.0158078
HSP90AB1	0.11	0.0266987
ACAP1	-0.155	0.00173467
IGFBP4	-0.103	0.0383034
ARHGDIB	-0.146	0.00328797
CTSW	0.024	0.624397
SRGN	-0.105	0.0344777
RPL38	-0.056	0.256911
DNAJA1	0.033	0.508489
CYTIP	-0.104	0.0359292
CD96	-0.012	0.808832
ACTN1	-0.01	0.840294
IL7R	-0.081	0.10379
PPIC	0.005	0.920105
CALD1	0.002	0.965119
FCGRT	-0.049	0.321181
DOK2	-0.113	0.0231944
IGFBP7	-0.102	0.0402803
PDLIM1	-0.197	6.4e-05
HSPA1A	-0.086	0.0848474
TCEAL4	0.01	0.842154
TNFRSF1A	-0.155	0.00172152
EVL	-0.016	0.741481
DUSP2	-0.079	0.113511
CD247	-0.097	0.0508732
TAX1BP3	-0.13	0.0089495
TRBC2	-0.092	0.065004
CD9	0.059	0.239513
MARCKS	0.014	0.774952
CD151	-0.206	2.94e-05
PRF1	-0.149	0.00265921
IL2RG	-0.122	0.0143652
PMP22	0.158	0.00138756
TSC22D1	-0.09	0.070734
SPARC	-0.028	0.570848
NNMT	-0.026	0.595825
CD37	-0.058	0.247126
CYB5R3	-0.049	0.329102
GNG11	-0.08	0.105984
NPC2	-0.099	0.0457691
SERPINB6	-0.049	0.325705
SH3BGRL3	-0.117	0.0188467
CNN3	0.146	0.00315154
YBX3	-0.13	0.009041
ADIRF	0.046	0.359911
MGST2	-0.186	0.000169263
HLA-E	-0.209	2.33e-05
APLP2	0.031	0.537387
CAV1	-0.025	0.618487
BRI3	0.013	0.793247
EMP1	-0.006	0.896277
ASPH	-0.056	0.260679
LAPTM4A	-0.008	0.867917
ATOX1	-0.11	0.0265996
MYL9	-0.026	0.604285
SOX4	0.219	8.55e-06
S100A4	-0.088	0.078483
TSPAN4	-0.023	0.648507
RGCC	-0.115	0.02091
CTSL	0.091	0.067498
RCN1	0.067	0.178959
EMP2	0.063	0.209419
CTNNA1	-0.057	0.254758
LEPROT	-0.105	0.0341649
CD27	-0.118	0.0175949
RRBP1	0.102	0.0407479
RPS10	-0.146	0.00322398
CTSB	-0.119	0.0170109
DUSP1	-0.107	0.0306534
PRDX4	0.182	0.00022234
TIMP3	-0.065	0.190303
CCL4	-0.109	0.0276138
TPM1	0.03	0.548195
MDK	0.074	0.136002
PLD3	0.08	0.108546
RAB34	-0.115	0.020862
OAZ2	-0.172	0.000492188
JUNB	-0.213	1.56e-05
PDLIM7	-0.074	0.137564
HSPE1	-0.049	0.321415
ID3	-0.245	6.01e-07
PTTG1IP	-0.039	0.436995
TCF4	-0.088	0.0754877
GAS6	-0.048	0.339327
CTSZ	0.012	0.811614
SARAF	-0.234	1.88e-06
TGFBI	-0.058	0.246622
PSMB5	0.051	0.310403
S100A16	-0.012	0.81307
CD40	-0.257	1.5e-07
RGS1	-0.101	0.0416833
HES1	0.029	0.557184
SERPING1	-0.143	0.00384462
PTMS	-0.002	0.971733
RHOH	-0.15	0.0024917
IFI27	-0.123	0.0129441
S100A13	-0.029	0.559396
CD81	-0.248	4.22e-07
GPX1	-0.183	0.000207362
SPOCK2	-0.226	4.48e-06
IFNGR2	-0.071	0.153263
LIMA1	-0.108	0.0299059
ZFP36L2	-0.039	0.43694
DUSP23	0.145	0.00349152
HSBP1	-0.105	0.0342501
CD53	-0.104	0.036224
CLU	-0.188	0.000145864
PGRMC1	0.178	0.000308543
HTRA1	-0.078	0.118726
TIMP2	0.015	0.76259
TUBB6	0.014	0.773651
CRIP2	-0.03	0.541394
PPFIBP1	-0.026	0.600389
PKIG	-0.008	0.877973
IER3	0.007	0.88472
SLC39A1	0.175	0.000397603
CALU	0.156	0.00163496
CSRP1	-0.136	0.00614348
PSAP	-0.094	0.0578706
RARRES3	-0.141	0.00436279
MMP14	-0.103	0.0373415
OS9	0.005	0.923542
PLS3	0.074	0.139102
GNAI2	-0.136	0.00603689
FSCN1	-0.069	0.167694
CAV2	-0.052	0.296226
CLTA	0.046	0.3544
DST	-0.122	0.0144125
ENG	-0.133	0.0073685
DYNC1I2	-0.046	0.360299
PRCP	-0.111	0.0260539
ATP6AP1	0.07	0.161934
PRSS23	-0.125	0.0120084
KDELR1	0.031	0.532398
SCARB2	0.073	0.141
CPE	-0.014	0.779882
KLF6	0.132	0.00766333
TRIP6	-0.192	9.93e-05
PON2	0.017	0.727203
COL4A1	-0.016	0.746725
YWHAE	0.03	0.546351
TINAGL1	-0.04	0.421015
MGP	0.02	0.695144
VKORC1	0.07	0.160839
CFH	-0.224	5.11e-06
HSD17B12	-0.168	0.000693116
TM4SF1	-0.007	0.880638
SCPEP1	-0.043	0.382739
ACADVL	-0.006	0.900316
AKR1A1	0.073	0.142506
VCAN	-0.092	0.0651999
HDLBP	0.007	0.882533
RDX	0.083	0.0951042
ARL1	-0.018	0.721879
CREG1	0.086	0.083531
SPTSSA	0.022	0.662729
PEA15	0.272	2.79e-08
EI24	0.012	0.805616
NUCB1	0.044	0.374068
EPHX1	-0.034	0.495054
HYAL2	0.018	0.722045
VAMP3	-0.084	0.0914875
TMEM14C	-0.047	0.341689
SYNGR2	0.008	0.876414
NDUFC1	-0.172	0.000512719
TGM2	-0.04	0.419185
GNB2	0.083	0.0940986
CAPNS1	-0.104	0.0355471
FSTL1	0.016	0.745845
TPM4	-0.054	0.278358
ARL2	-0.023	0.637692
LAMTOR2	0.097	0.0518787
LAPTM5	-0.157	0.0015804
SAMSN1	-0.129	0.00944146
IL13RA1	0.012	0.815111
FAM114A1	0.049	0.323636
SPARCL1	-0.081	0.104256
AP2S1	0.069	0.165568
H2AFJ	-0.005	0.914552
LGALS3BP	-0.184	0.0001935
RAB31	0.008	0.876521
TIMM13	0.017	0.728269
COL4A2	-0.012	0.813412
BAD	0.081	0.102071
COMT	-0.12	0.0155574
RHOB	0.019	0.696345
NAA20	0.04	0.424775
CTSH	-0.134	0.00695538
KLF4	-0.006	0.906981
MLEC	0.036	0.476131
PDLIM4	-0.063	0.204826
RAB32	-0.056	0.2647
ASAH1	-0.024	0.626057
LAMP2	0.082	0.0981864
CHMP4B	0.21	2.03e-05
A2M	-0.101	0.0425241
MTCH1	0.139	0.00508798
MRPL32	0.071	0.153
LTBR	0.006	0.896612
CTHRC1	0.038	0.44006
UACA	-0.021	0.668836
BIN2	-0.119	0.0168849
HEBP1	0.101	0.0422733
NUCKS1	0.071	0.153089
DSTN	0.086	0.0847907
SERPINH1	0.002	0.960042
ILK	-0.047	0.35027
CYSTM1	0.001	0.985473
ARPC1A	0.167	0.000735422
NRP2	-0.066	0.185561
ANXA4	0.099	0.0463759
GLUL	-0.118	0.0174801
SPATS2L	0.002	0.96909
ZFYVE21	-0.178	0.000321424
FHL2	-0.033	0.503366
CDK4	0.176	0.00037365
TMED3	-0.003	0.955392
AXL	-0.078	0.117521
C1R	-0.007	0.894325
COPRS	0.176	0.000377803
MVB12A	-0.086	0.0823518
BIRC3	-0.066	0.18733
IKBIP	-0.124	0.01219
CTTN	-0.13	0.00899238
TAGAP	-0.15	0.00240356
MYLK	0.061	0.222018
COL1A1	0.019	0.710474
WWTR1	0.021	0.676767
GOLIM4	0.088	0.0754517
CCDC50	0.06	0.231231
CTNNB1	-0.008	0.871135
NRP1	-0.047	0.342747
COL1A2	0.003	0.948409
TJP1	0.003	0.950067
TMED9	-0.019	0.696023
CACYBP	0.237	1.38e-06
MXRA8	0.001	0.982034
PFDN1	-0.025	0.612531
RPL36AL	-0.253	2.43e-07
BACE2	0.045	0.365373
NFIC	-0.018	0.718576
NME1	0.136	0.00623201
PLOD1	0.129	0.00908561
PALLD	-0.032	0.516798
CKAP4	-0.087	0.0818022
MFGE8	0.008	0.873466
TXNDC17	-0.108	0.0300714
NET1	0.142	0.00419038
CRTAP	-0.098	0.048721
QSOX1	-0.036	0.46481
SLC16A3	-0.079	0.111344
AGPAT2	0.112	0.0236966
TIMP1	-0.06	0.225082
MAP1B	-0.06	0.230659
PLAU	-0.067	0.176409
PLSCR1	0.051	0.307477
TSPAN3	-0.134	0.00702849
GPR183	-0.067	0.178951
FKBP1A	0.01	0.834713
VGLL4	0.171	0.000557192
MRPL15	0.189	0.000127809
PHLDA3	-0.135	0.00648241
TNFAIP3	0.05	0.318689
PTPN7	-0.134	0.00706697
BLVRB	-0.003	0.948416
MYL6B	-0.045	0.364498
TOMM7	-0.03	0.545391
GINM1	-0.055	0.271167
YIPF3	0.062	0.210514
NBL1	0.001	0.976981
A4GALT	-0.185	0.000175366
MMP2	-0.09	0.0710481
LMAN1	0.037	0.459148
TPBG	-0.038	0.441931
IGFBP5	-0.066	0.186634
TGFB1I1	-0.059	0.236458
SERPINA1	-0.042	0.404173
SEPT10	-0.047	0.343289
GJA1	-0.002	0.975531
LAP3	-0.097	0.051133
CLIC4	0.108	0.0298531
GPNMB	0.08	0.109333
CD276	0.108	0.0297756
ARL3	0.005	0.912753
ISOC2	0.033	0.50217
GRINA	0.038	0.449176
NUPR1	-0.003	0.945076
JAG1	-0.089	0.0747717
CLTC	0.09	0.0696155
PLIN3	-0.019	0.697463
TFPI	-0.129	0.00936289
ETS2	-0.063	0.207044
DAB2	0.12	0.0152901
SEC61A1	0.156	0.00168103
KDELR2	0.324	2.43e-11
C1orf122	0.052	0.295995
LAMB1	0.009	0.853589
EGR1	0.059	0.234838
FEZ2	-0.005	0.922818
AK1	0.093	0.0610285
PLTP	0.02	0.690994
SDC2	-0.021	0.679387
DAP	0.187	0.000155204
MPZL1	0.197	6.54e-05
AKAP12	0.145	0.00350136
CD63	-0.151	0.00235886
GOLM1	0.1	0.0449415
MANBAL	0.038	0.440256
PHPT1	-0.037	0.462631
SMIM14	-0.113	0.0223792
PFN2	0.09	0.0706764
MEF2A	-0.075	0.133842
DYNC1LI2	0.057	0.24944
CSRP2	0.088	0.0776905
RBP1	-0.019	0.707692
FNDC3B	0	0.995063
LGALS3	0.02	0.690556
CCND1	-0.328	1.39e-11
TPD52L2	0.103	0.0382242
COL6A1	0.012	0.812656
FAM3C	-0.038	0.443552
EPS8	-0.034	0.491749
SLC9A3R2	-0.07	0.162017
TUSC3	-0.067	0.17534
TPM2	-0.03	0.543951
TMEM9	0.09	0.069438
PHLDA2	-0.014	0.78406
MGLL	0.047	0.349303
AP1S1	-0.015	0.761832
SERINC2	-0.049	0.329162
TBC1D10C	-0.116	0.0194792
RAI14	0.107	0.0317829
HSPG2	-0.008	0.87358
TP53I3	-0.099	0.0462937
HNMT	-0.208	2.53e-05
MSRB2	-0.072	0.146957
LSP1	-0.224	5.45e-06
MCFD2	0.053	0.285406
FKBP9	0.088	0.0759498
INHBA	0.008	0.87075
TSPAN13	0.135	0.00647161
C9orf3	-0.095	0.057138
AIG1	-0.125	0.011706
AAMDC	-0.02	0.69063
SNX7	0.014	0.771739
PLAUR	0.022	0.662772
GPX3	0.03	0.540907
RHOBTB3	0.012	0.81341
CCDC80	0.014	0.780317
SNCG	0.013	0.789818
H1F0	0.202	4.37e-05
DKK3	-0.072	0.150306
EPAS1	-0.047	0.340818
CTNND1	-0.02	0.681461
ITGAV	-0.082	0.101045
TRAF3IP3	-0.125	0.0115256
P4HA2	0.008	0.8781
SRSF7	0.029	0.562683
CLEC2D	-0.095	0.0565943
SERPINF1	0.011	0.826463
SPTBN1	0.099	0.0458792
EHD2	-0.045	0.363598
SRPX	0.037	0.452289
MYDGF	0.031	0.529478
TAGLN	-0.027	0.584075
DNTTIP1	0.14	0.00471371
ID1	-0.143	0.00388296
KRT18	0.031	0.531877
RAC2	-0.197	6.3e-05
PARVA	-0.094	0.0575066
PALMD	0.023	0.648845
LAT	-0.096	0.0541816
HAPLN3	-0.059	0.239491
LAMC1	-0.056	0.262733
CD68	-0.174	0.000441358
NREP	0.077	0.1203
GSTO1	-0.323	2.63e-11
TUBA1C	0.133	0.00744945
GAA	-0.066	0.182463
RNF130	0.04	0.425827
RHOC	-0.047	0.345176
G6PC3	0.019	0.704841
TPST1	0.019	0.697844
IFNAR1	-0.002	0.966018
ALDH2	-0.099	0.046997
FAM210B	-0.032	0.517107
LTBP1	0.135	0.00643584
SVIL	0.098	0.0478551
CCDC88A	-0.056	0.264249
FBLN1	0.165	0.00087404
SLC29A1	0.163	0.000992599
GPX8	-0.011	0.826671
COL12A1	0.062	0.216242
SPHK1	0.042	0.395756
KDELR3	0.257	1.64e-07
MEF2C	-0.119	0.0170264
IGFBP6	-0.132	0.00799801
SDC1	-0.105	0.0340104
RND3	-0.115	0.0208263
CD109	0.007	0.882094
PROCR	-0.147	0.0029977
ANXA1	0.009	0.857836
GSTM3	0.019	0.695882
LARP6	-0.051	0.305552
MDFI	-0.102	0.0400879
CORO1C	0.001	0.976148
PMEPA1	-0.068	0.169343
ALCAM	-0.02	0.689232
CDC42EP1	0.014	0.771339
MALL	-0.028	0.568259
NFIB	0.217	1.01e-05
TACSTD2	-0.018	0.724989
WARS	-0.08	0.108389
VWA1	0.09	0.0710445
PLAT	0.007	0.882755
CERCAM	0.13	0.00894207
BMPR2	-0.064	0.201796
HOXB7	-0.027	0.58521
MAST4	-0.067	0.179383
PTN	0.28	9.84e-09
FXYD5	0	0.995451
SHC1	-0.059	0.238936
TMEM45A	0.008	0.872354
FBN1	-0.016	0.75213
TMEM54	-0.035	0.488673
PINK1	-0.046	0.359472
TBX3	0.003	0.950094
LGMN	-0.111	0.0261463
RBPMS	-0.124	0.0123229
KRT8	-0.02	0.695068
TMEM176B	-0.035	0.479682
JUP	0.042	0.402687
EVI2B	-0.122	0.0137354
TCEAL1	-0.119	0.0164664
COL8A1	-0.029	0.557972
NCKAP1	0.028	0.580875
ITGB5	0.082	0.0999958
BCAR1	-0.04	0.421059
FAM129B	0.034	0.491168
CRYAB	-0.004	0.928673
COL6A2	0.025	0.622003
SWAP70	-0.116	0.0196957
CREM	0.127	0.0103691
PNRC1	-0.145	0.00343593
GLT8D2	-0.008	0.866548
CAMK2N1	0.017	0.728952
GNB4	0.004	0.934346
GNG12	-0.028	0.576631
TSC22D3	-0.131	0.00839408
ENAH	0.188	0.000143293
KANK2	0.025	0.60927
ACTA2	-0.042	0.403819
CDC42BPA	-0.123	0.0134135
PLOD2	0.017	0.734581
ITM2A	-0.073	0.140473
ARHGAP29	0.135	0.00655296
RHOD	-0.016	0.746129
PSME1	-0.276	1.67e-08
SERPINE2	-0.041	0.410342
FERMT2	0.004	0.931737
THBS1	-0.038	0.441764
PTK2	0.025	0.611182
DUSP6	-0.147	0.00296422
RAC1	0.069	0.164058
RAMP1	0	0.999355
DCBLD2	0.148	0.00290241
C1orf54	-0.109	0.0283679
SLC14A1	-0.097	0.0522986
CD44	-0.191	0.000113525
ADM	-0.144	0.00377567
GPRC5C	-0.097	0.0503401
MAFB	0.11	0.027544
LRP1	-0.041	0.41084
DPYSL2	-0.001	0.987766
CFI	-0.093	0.0602834
GPC1	-0.172	0.000492719
LXN	-0.021	0.67303
CLDN4	0.139	0.00510906
FAP	0.028	0.568954
MPZL2	-0.085	0.0879156
HRAS	-0.107	0.0306818
TNFRSF12A	0.01	0.83404
C1S	-0.006	0.910205
SNAI2	-0.186	0.000160395
TMEM98	0.119	0.0167516
EDNRA	-0.054	0.278336
PTK7	-0.029	0.554975
OSBPL1A	-0.01	0.84798
BGN	-0.052	0.299413
ABL2	0.076	0.127458
COL6A3	-0.004	0.929508
PLEK2	-0.14	0.00489362
LOXL2	0.01	0.843798
ITGA6	-0.093	0.0609145
LMCD1	0.047	0.349097
SIRPA	-0.07	0.162186
VAT1	0.224	5.13e-06
LUM	-0.036	0.470402
KCTD12	-0.101	0.041524
SPINT1	0.026	0.606916
KCNJ15	0.015	0.76815
THY1	-0.012	0.805956
TPD52L1	0.015	0.765327
RORA	0.063	0.203721
COL5A2	0.04	0.426045
HBEGF	-0.025	0.619039
BHLHE41	-0.072	0.145287
LAPTM4B	0.192	9.96e-05
LAMB3	-0.219	8.28e-06
COL18A1	-0.005	0.924767
ITGB4	-0.131	0.00805628
NT5E	-0.092	0.0631609
FILIP1L	-0.024	0.625809
KRT19	-0.112	0.0236478
SSPN	-0.004	0.928614
ITGA2	-0.128	0.00969159
CSTA	-0.071	0.152855
SDC4	0.078	0.114821
EFEMP1	0.028	0.573358
DPYSL3	-0.009	0.859128
PLPP1	0.011	0.831902
DSP	0.062	0.21437
SPOCK1	-0.079	0.110345
NR2F2	0.009	0.85281
LOXL1	-0.147	0.00311909
STRA6	-0.055	0.265564
GNS	-0.091	0.0669823
TMEM176A	-0.01	0.83861
UBE2E2	0.011	0.820748
NPDC1	-0.168	0.000706119
LPCAT2	-0.167	0.000741885
BCAM	-0.067	0.177425
CAPS	-0.021	0.669946
MLPH	-0.101	0.0428733
SCG5	0.035	0.478359
PLBD1	0.023	0.643261
SOD1	-0.021	0.673524
SERTAD4-AS1	0.001	0.986698
PLXDC2	-0.097	0.0507701
COL7A1	-0.099	0.0470746
ANTXR1	0.02	0.693373
LAMA4	-0.044	0.371858
SPINT2	0.209	2.15e-05
FBLIM1	0.024	0.633854
ITGA3	-0.146	0.00326263
RCAN1	0.095	0.0563914
TSPAN7	-0.111	0.0252273
SERPINE1	-0.032	0.526664
ZFHX3	0.041	0.409956
C19orf33	0.008	0.871926
FN1	0	0.996933
PERP	-0.024	0.626486
KRT5	-0.16	0.00127638
ANGPTL4	-0.004	0.934324
SFN	-0.05	0.316248
NDRG2	0.115	0.0211791
RNASE1	0.018	0.720926
G0S2	-0.09	0.070233
FKBP10	0.038	0.445831
ZNF503	-0.073	0.140068
ADAM15	0.099	0.0460234
MSRB3	-0.024	0.623647
HSPD1	0.059	0.234985
DHRS2	0.02	0.695086
HMGA2	0.044	0.376642
IGF2	-0.063	0.20401
TNC	0.025	0.621017
ITGB2	-0.095	0.0564422
COL3A1	0.028	0.567908
CPVL	0.068	0.168876
SLPI	-0.111	0.0260611
CXCL14	-0.151	0.00233865
LAMB2	-0.072	0.149805
ID4	-0.09	0.070041
AQP1	-0.08	0.106731
GJB2	-0.002	0.973507
STK17A	-0.016	0.740662
IGFBP2	-0.098	0.0498884
TFPI2	-0.026	0.599234
EFEMP2	0.01	0.834185
GPR65	-0.206	2.98e-05
LIMD2	0.005	0.91721
PDLIM3	0.005	0.927362
SIGLEC15	-0.003	0.958918
PCOLCE	-0.046	0.355609
C11orf96	0.014	0.774387
KRT17	-0.079	0.114703
STK4	0.088	0.0782276
AEBP1	-0.014	0.775474
PTGER4	0.017	0.726091
PECAM1	-0.08	0.107693
TNFRSF11B	0.013	0.789633
CLEC11A	-0.031	0.538561
POSTN	0.019	0.701418
DCN	-0.026	0.606796
KRT7	-0.025	0.611928
LAMC2	-0.06	0.225972
APOE	0.066	0.181913
LY96	-0.063	0.203244
HSPH1	0.184	0.00020214
SPRY1	-0.092	0.0645679
IGFBP3	-0.017	0.725756
GPSM3	-0.295	1.37e-09
C15orf48	0.084	0.0898348
ARHGAP15	-0.098	0.0485776
GMFG	-0.288	3.56e-09
ID2	-0.155	0.00177183
LEPROTL1	-0.237	1.39e-06
APOD	0.064	0.196753
IRF1	-0.128	0.00973014
ZNF331	0.177	0.000352082
TUBA4A	-0.175	0.000398314
ISG20	-0.101	0.0428798
BTG2	-0.131	0.00825404
HSPA1B	0.177	0.000347141
SEPT1	-0.16	0.00119149
HLA-DMB	-0.114	0.0220725
ALOX5AP	-0.137	0.00583407
GIMAP7	-0.177	0.000356568
CLK1	-0.2	4.96e-05
TSPYL2	0.05	0.318242
ELF1	-0.097	0.0511887
WIPF1	-0.076	0.127713
LCP1	0.004	0.94179
ICAM3	-0.149	0.00256074
CDC42SE2	-0.15	0.00254954
COTL1	-0.09	0.07111
RGS2	-0.062	0.214061
FCER1G	-0.078	0.115351
HMGB2	0.226	4.3e-06
SRSF5	-0.191	0.000111776
STK17B	-0.023	0.649639
PPP2R5C	-0.042	0.400634
CLEC2B	-0.21	2.07e-05
HCLS1	-0.117	0.0189077
FUS	0.027	0.594517
YPEL5	-0.062	0.216153
IDS	-0.051	0.30999
NR4A2	0.025	0.612004
GIMAP4	-0.162	0.00107611
CYCS	0.159	0.00136035
TNFAIP8	-0.067	0.176953
FYN	-0.008	0.871898
DEDD2	0.093	0.0624254
HSPA6	0.13	0.00868463
APOBEC3G	-0.044	0.373211
REL	0.052	0.297155
LINC00973	-0.009	0.860015
SLITRK6	-0.106	0.0335199
CRLF1	0.098	0.047967
PPP1R14C	0.056	0.261436
PKP3	-0.106	0.0324321
SERPINB5	-0.154	0.00188502
KCNN4	-0.013	0.794549
ERICH3	0.006	0.910199
TNNT1	0.053	0.287709
EVA1A	0.01	0.844065
PTPRU	-0.147	0.00310827
CRTC1	-0.078	0.115696
PAX8	-0.014	0.777122
STX1A	-0.052	0.296251
FERMT1	0.001	0.987662
COL17A1	-0.162	0.0010974
SHC4	0.026	0.604126
CDCP1	0.001	0.980226
CSPG4	-0.034	0.490745
GPR87	-0.042	0.402154
DAPL1	-0.12	0.0158976
EREG	0.117	0.0184231
AHNAK2	-0.047	0.340433
CST4	-0.08	0.108479
MCF2	-0.104	0.0369661
EPS8L2	-0.129	0.00938314
ULBP2	0.01	0.839998
LYPD3	-0.018	0.711056
SOX9	0.056	0.256662
LAMA3	-0.102	0.0403124
TSPAN1	-0.189	0.000127381
TNS4	-0.16	0.00121531
SEC14L2	0.033	0.510346
CDH13	-0.054	0.274005
WNT7A	-0.013	0.796176
AMTN	0.057	0.256281
BCAS4	0.067	0.179479
ALG1L	-0.028	0.575591
RNF128	0.025	0.611684
HSD17B1	0.01	0.83543
LAD1	-0.149	0.00261717
MIA	0.076	0.124714
IRF6	-0.041	0.416182
MAMDC2	0.016	0.749898
IGF2BP2	0.121	0.0144674
AGRN	-0.037	0.460533
SLC20A1	0.022	0.665503
SYNDIG1	-0.007	0.895458
TOX2	-0.079	0.11205
PPP1R13L	-0.082	0.100345
SLC2A1	-0.098	0.0477735
ITGB6	-0.158	0.00145242
VEGFC	0.046	0.353559
DSC3	-0.048	0.332058
COL9A2	-0.029	0.556674
CD58	-0.13	0.00862509
SYTL1	-0.171	0.000548594
DDR1	-0.026	0.596476
SLC26A2	-0.001	0.985847
PYGB	0.03	0.544382
KIZ	-0.152	0.0021807
ANXA8L1	-0.137	0.00558114
PLXNA1	0.141	0.00448548
S100A1	-0.051	0.304005
SEL1L3	-0.159	0.00133631
SEMA4B	-0.229	3.17e-06
MYEOV	-0.158	0.00137942
CD163L1	0.017	0.735774
LRIG3	0.015	0.769685
ABHD2	-0.069	0.164538
TRIM29	-0.048	0.338106
CLIC3	0.015	0.757511
SLC38A5	-0.128	0.0100457
SEMA3C	-0.061	0.222159
GJB3	-0.056	0.258401
PORCN	-0.071	0.1564
C6orf141	0.003	0.955402
FAM83A	-0.094	0.0580337
CDH2	-0.019	0.701652
AC003092.1	0.012	0.815137
S100A2	-0.182	0.000225449
ST6GALNAC2	-0.032	0.51873
AIM2	-0.237	1.36e-06
GALE	-0.065	0.193332
PFKFB4	0.048	0.338484
PTPRF	0.155	0.00177232
RPS23	-0.327	1.56e-11
STEAP3	-0.055	0.269194
CDK6	-0.115	0.0211124
DSC2	0.149	0.00257848
RTTN	0.046	0.353712
PTHLH	-0.081	0.102362
HMGA1	-0.017	0.735016
GPC4	-0.028	0.5736
SLC35F2	-0.013	0.798307
BCAR3	0.085	0.089119
ENPP1	-0.018	0.722184
HOXB6	-0.128	0.00971344
PTGES	-0.019	0.700612
ARL4D	-0.067	0.179103
GCLM	0.091	0.0670894
DCBLD1	-0.045	0.363088
BIK	0.029	0.555031
DSG2	0.065	0.189848
RPS24	-0.217	1.01e-05
NDFIP2	-0.101	0.0420678
CNIH3	0.197	6.79e-05
TGFA	0.136	0.00599699
LINC00958	-0.12	0.01588
MT1X	-0.035	0.481168
BAIAP2L1	-0.037	0.463841
SEMA7A	0.05	0.314804
LSR	0.213	1.5e-05
TMX4	-0.013	0.793859
AGR2	-0.093	0.0616598
MET	0.038	0.449388
CITED4	0.036	0.473731
LTBP2	-0.015	0.756537
FEZ1	0.083	0.0937456
TMEM132A	0.133	0.00742509
RPS13	-0.302	5.38e-10
CDH3	-0.073	0.144362
CRNDE	-0.137	0.00569475
FZD6	0.004	0.938218
KRT14	0.054	0.280401
FOXC1	-0.095	0.0572487
EPHA2	-0.1	0.0453186
PRKCA	-0.08	0.108448
ADGRG1	-0.132	0.00767726
EPCAM	0.217	1.01e-05
PDGFC	-0.015	0.760074
RASSF7	-0.101	0.0414839
PSD3	-0.025	0.617351
RGS12	-0.119	0.0162645
HOMER3	-0.035	0.486497
HOXD1	-0.085	0.0879394
LRRC8A	0.079	0.11072
CLCA2	-0.158	0.00142558
HEBP2	-0.007	0.887214
WFDC2	0.057	0.255271
CST1	-0.082	0.0977267
DTD1	0.068	0.171356
NPTN	-0.162	0.00105264
ETHE1	-0.115	0.0202645
BAIAP2	0.009	0.862965
CD82	-0.117	0.018135
CA12	-0.199	5.3e-05
BLCAP	-0.14	0.00468412
KRT6A	-0.051	0.303772
ZBED2	-0.068	0.171665
KRT16	0.025	0.613042
PTPRK	-0.074	0.138064
ACOT7	0.148	0.00275408
SLC31A2	0.119	0.0165104
ADAM8	-0.008	0.868488
SMIM4	-0.034	0.489018
ADAM19	-0.006	0.903528
PLEC	-0.123	0.0136154
PGM1	0.015	0.762144
RUNX2	0.013	0.793553
PTTG1	0.12	0.0159367
GAS2L1	0.061	0.222304
OCIAD2	-0.093	0.0605421
PRNP	-0.085	0.0868572
PLXNB2	-0.127	0.0106417
PAFAH1B3	0.181	0.000245086
S100A14	0.013	0.799135
RIN2	-0.047	0.350386
UCHL3	-0.002	0.97061
TWF1	0.027	0.582696
SLC35B2	0.005	0.921606
IVNS1ABP	-0.059	0.239609
ARL4C	-0.039	0.43075
SMIM3	-0.044	0.374219
SAA1	-0.03	0.550152
CHPF	-0.023	0.651538
CARD19	-0.011	0.826048
CRLS1	0.075	0.131871
MALSU1	0.208	2.37e-05
C12orf75	0.166	0.000818909
PLP2	-0.018	0.725313
MT2A	-0.025	0.61484
NT5DC2	0.073	0.139878
CD24	0.12	0.015299
PHLDA1	-0.063	0.207337
LYPLA2	0.036	0.475792
F3	-0.047	0.349215
FSTL3	-0.048	0.334872
IP6K2	-0.05	0.317771
FXYD3	-0.105	0.0342386
SH3KBP1	0.216	1.17e-05
UBE2E3	-0.065	0.190668
CMTM3	0.075	0.132009
AGTRAP	-0.041	0.412695
YIPF5	-0.061	0.220031
FABP5	-0.092	0.0650935
CKLF	-0.006	0.90475
FOS	-0.083	0.093322
CTSA	0.087	0.0795927
HM13	0.154	0.00192577
CD55	0.111	0.0249035
MMP10	-0.084	0.0921869
PSMD2	0.202	4.12e-05
CAPN2	-0.106	0.0324342
JUN	-0.036	0.470163
ZFP36	0.007	0.890437
PABPC1	0.143	0.00385632
STOM	-0.054	0.281303
HLA-DPB1	-0.137	0.00563014
HLA-DPA1	-0.123	0.0131428
HLA-DQB1	-0.181	0.000250025
IFITM2	-0.171	0.000551561
HLA-DMA	-0.16	0.00126848
NR4A1	0.026	0.603485
HLA-DRB1	-0.147	0.00300043
FOSB	-0.041	0.408254
GYPC	-0.067	0.175712
TYMP	-0.134	0.00690254
PPP1R15A	0.159	0.00132021
NFKBIA	0.011	0.822833
C4orf3	-0.117	0.0185514
KCNQ1OT1	0.023	0.641243
CD74	-0.209	2.25e-05
HLA-DQA1	-0.117	0.0183972
LGALS9	-0.119	0.0163563
HLA-DRA	-0.135	0.00653942
SLC2A3	-0.028	0.572746
ATF3	0.016	0.741748
SOCS3	-0.034	0.496843
TXNIP	-0.183	0.000211301
SDCBP	-0.042	0.394873
KLF2	-0.127	0.010812
SH3BGRL	-0.162	0.00109562
PLA2G16	0.05	0.311729
CYB5A	0.074	0.139278
ITM2C	0.095	0.0551221
GADD45B	-0.065	0.191952
HLA-F	-0.23	2.86e-06
PLIN2	0.197	6.84e-05
ARID5B	-0.077	0.121117
DDAH2	0.192	0.000100833
PSMB9	-0.152	0.00209825
CEBPD	-0.016	0.743195
HERPUD1	-0.121	0.0150888
GBP2	-0.081	0.103715
RGS16	0.093	0.0623498
SH3BP5	0.207	2.71e-05
DDIT4	-0.134	0.00701531
AIF1	-0.124	0.0125848
MS4A6A	-0.106	0.0335659
MNDA	-0.131	0.0085475
SPI1	-0.118	0.0179518
IGSF6	-0.126	0.0108384
LST1	-0.16	0.00120905
MS4A7	-0.01	0.846115
RNASE6	-0.102	0.0398719
CYBB	-0.078	0.115331
TYROBP	-0.094	0.0574307
LYZ	-0.026	0.598913
FCGR2A	-0.066	0.188012
C1orf162	-0.105	0.0338142
CD86	-0.057	0.24864
C1QC	-0.078	0.115891
HCK	-0.109	0.028676
CLEC7A	0.071	0.151891
MRC1	-0.013	0.786844
MS4A4A	-0.045	0.363278
CLEC4A	-0.141	0.00436037
LY86	-0.114	0.0216876
CSF1R	-0.102	0.0408072
C1QB	-0.087	0.0787591
C1QA	-0.091	0.0663294
FPR3	-0.043	0.392945
FCGR3A	-0.035	0.488645
CSF2RA	-0.011	0.820529
LILRB4	-0.061	0.219583
LAIR1	-0.089	0.074747
PLEK	-0.1	0.0433134
CD14	-0.071	0.155741
OLR1	0.052	0.297218
TBXAS1	-0.126	0.011153
TREM2	-0.062	0.213522
SLCO2B1	-0.042	0.394188
FCGR1A	-0.041	0.411012
CD300A	-0.118	0.017102
FCGR2B	-0.073	0.143989
CD163	-0.028	0.568675
PILRA	-0.021	0.676139
VSIG4	-0.065	0.189134
CD4	-0.197	6.72e-05
GPR34	-0.093	0.0621983
CLEC5A	-0.045	0.362987
IFI30	-0.113	0.022717
CLEC10A	-0.136	0.00608434
FGL2	-0.172	0.000521832
CD33	-0.098	0.0489534
LRRC25	-0.087	0.0800101
S100A9	0.047	0.34216
MPEG1	-0.114	0.0220281
C5AR1	0.005	0.91341
TNFSF13B	-0.142	0.00432433
ADAP2	-0.01	0.834496
RASSF4	-0.029	0.55436
IL1B	0.086	0.0837387
TNFAIP8L2	-0.163	0.00101725
C3AR1	-0.077	0.121097
CCL3	-0.061	0.218015
LAT2	-0.107	0.0313661
PHACTR1	0.053	0.289467
CTSS	-0.135	0.00652117
FOLR2	-0.035	0.480222
FERMT3	-0.092	0.0651078
NCKAP1L	-0.115	0.0206405
IRF8	-0.075	0.133597
SLC7A7	-0.048	0.331773
MSR1	0.002	0.975094
JAML	-0.203	4.04e-05
HAVCR2	-0.079	0.111927
APOC1	0.08	0.108699
NCF4	-0.118	0.0177506
CD84	-0.082	0.0989473
SLAMF8	-0.077	0.120653
HMOX1	0.156	0.00169567
FPR1	-0.088	0.0753083
PLD4	-0.209	2.14e-05
UCP2	-0.02	0.694307
S100B	-0.172	0.000489995
LYN	-0.021	0.678686
SLC11A1	0.012	0.812761
OSCAR	-0.063	0.205687
CXCL8	-0.051	0.307077
CAPG	0.043	0.389122
LILRB3	-0.047	0.348559
NCF2	-0.074	0.137568
SYK	-0.046	0.35931
ARRB2	0.131	0.00813187
CSF3R	-0.018	0.712303
RGS10	-0.029	0.562004
BTK	-0.092	0.0654441
VAMP8	0.01	0.833471
F13A1	-0.071	0.154894
TFEC	-0.064	0.196155
AOAH	-0.124	0.0121908
WAS	-0.127	0.0106724
S100A8	0.062	0.210091
CD300LF	-0.105	0.0353527
CXorf21	-0.086	0.0856412
RNASET2	-0.144	0.00374394
ARHGAP18	-0.113	0.0227619
FTL	0.003	0.953182
RGS18	-0.159	0.00128724
ALOX5	-0.09	0.0705148
PARVG	-0.097	0.0514669
P2RY13	-0.195	7.56e-05
FBP1	0.033	0.506931
SCIMP	-0.112	0.0239799
LILRB2	-0.071	0.151097
CEBPA	0.128	0.0101102
ITGAX	-0.042	0.401748
FCGR1B	-0.057	0.254767
LINC01094	-0.004	0.943584
CXCL16	-0.026	0.607524
PIK3AP1	-0.076	0.129167
SELPLG	-0.124	0.0124836
MYO1F	-0.161	0.0011278
BCL2A1	-0.096	0.0535861
PTPN6	-0.139	0.00492691
LILRB1	-0.137	0.00571107
ACP5	0.019	0.707305
TM6SF1	-0.084	0.0912559
LGALS2	-0.046	0.357412
PYCARD	-0.199	5.44e-05
SIGLEC10	-0.157	0.00147955
APOBR	-0.209	2.21e-05
NPL	-0.13	0.00903818
FGR	-0.232	2.33e-06
SNX20	-0.154	0.00194523
CCL13	-0.001	0.981958
OGFRL1	0.002	0.974978
HLA-DRB5	-0.151	0.00231532
CYBA	-0.218	9.6e-06
HLA-DQB2	-0.166	0.000795839
SAMHD1	0.015	0.757552
LCP2	-0.155	0.00173073
CLECL1	-0.097	0.0521855
MMP12	-0.048	0.333807
EVI2A	-0.087	0.0817968
IL1RN	-0.063	0.204683
MMP9	-0.021	0.676554
RENBP	0.101	0.0431418
SNX10	0.126	0.0114408
STAC3	-0.053	0.289725
CD300C	-0.087	0.0801838
GK	0.035	0.484188
PPT1	0.103	0.0391493
PTGS1	-0.054	0.27976
CCR1	-0.046	0.351856
CTSC	-0.041	0.416217
APBB1IP	0.045	0.366123
CYTH4	-0.106	0.0328459
PTAFR	-0.209	2.19e-05
FUOM	0.113	0.0225196
ASGR1	0.194	8.76e-05
SMCO4	0.15	0.00240125
FAM49B	0.135	0.00656374
DOCK2	-0.123	0.0135516
VMO1	0.001	0.978109
TNFSF12	-0.044	0.377997
OSM	-0.016	0.749711
ADGRE2	0.003	0.952928
CD83	0.161	0.00118406
HLA-DOA	-0.103	0.0389895
MPP1	-0.015	0.757971
SLC43A2	0.016	0.755613
SPP1	-0.021	0.666568
SLC25A19	0.248	4.37e-07
ABI3	-0.185	0.000181245
RHOG	-0.185	0.000175791
MFSD1	-0.048	0.334323
GCA	0.054	0.275923
ANXA5	-0.047	0.348748
YWHAH	0.108	0.0292292
IL18	-0.258	1.35e-07
ATP6V1B2	-0.143	0.00387357
GLRX	-0.209	2.22e-05
NAIP	-0.209	2.19e-05
CXCL2	0.055	0.267094
KYNU	-0.166	0.000777823
ATP6V1F	0.023	0.649959
LIPA	-0.133	0.00714086
ST3GAL6	0.049	0.33022
PLA2G7	0.036	0.473751
CISH	0.068	0.1704
SOD2	-0.063	0.205045
APOL4	0.082	0.101097
GRB2	0.128	0.00988765
TLR2	-0.202	4.07e-05
SLC8A1	0.074	0.13967
DAPK1	0.186	0.000173697
IER5	-0.041	0.415311
CXCL3	0.036	0.474064
ATP6V0B	0.079	0.112121
C2	-0.073	0.144127
STAB1	-0.11	0.0270644
CCL18	0.028	0.567593
CTSD	-0.156	0.00167935
FAM49A	0.081	0.105512
SERPINB9	0.047	0.348262
STX11	-0.023	0.641166
CFD	-0.058	0.242902
ZEB2	-0.079	0.110984
SHTN1	0.061	0.223294
STXBP2	-0.024	0.634696
THEMIS2	-0.048	0.336772
NAGA	0.069	0.165314
EMILIN2	-0.058	0.240883
IL4I1	-0.041	0.408445
C12orf57	-0.176	0.00038156
MXD1	0.005	0.915607
RGS19	0.054	0.281716
EFHD2	-0.062	0.211853
CSTB	0.025	0.610906
ST14	0.024	0.636002
ACTR2	0.081	0.10238
CASP1	-0.269	4.05e-08
FMNL1	0.011	0.822618
CARD16	-0.286	4.8e-09
DAPP1	-0.073	0.144313
SLC15A3	-0.123	0.0134767
RB1	-0.187	0.000159318
CPM	0.184	0.000193682
TREM1	-0.025	0.615594
SNX2	-0.058	0.248002
SNX8	0.234	1.86e-06
CAMK1	0.098	0.0487102
PPIF	0.008	0.864753
RBPJ	-0.065	0.194654
GNA15	-0.101	0.0424122
BLOC1S1	-0.088	0.0779488
RAB20	0.105	0.0345569
NR4A3	0.033	0.505156
SYNE2	0.142	0.00407248
LBH	-0.026	0.602682
PAK1	-0.052	0.292433
B3GNT5	0.204	3.58e-05
IFNGR1	-0.153	0.00195275
LMNA	-0.028	0.57276
ICAM1	0	0.997998
ATP6V0D1	-0.095	0.0559552
MOB1A	0.09	0.0713055
NAAA	0.083	0.0961659
PLEKHO1	0.025	0.611806
SGK1	-0.104	0.0364923
P2RY6	0.092	0.064018
PGD	0.09	0.0717249
PRDX2	0	0.996433
NINJ1	-0.055	0.266607
CHCHD10	-0.213	1.49e-05
GCHFR	-0.034	0.498098
MIF4GD	0.079	0.112621
HACD4	0.01	0.843162
CNPY3	0.041	0.412884
MGAT1	-0.013	0.795117
TPP1	-0.112	0.0236453
NUP214	0.167	0.000714617
HVCN1	-0.199	5.31e-05
RNF13	0.033	0.511897
NFKBIE	-0.039	0.439203
AP1S2	0.059	0.238987
RBM47	0.083	0.0955749
ITGB1	0.085	0.0872359
IFITM1	-0.092	0.0644789
BMP2K	0.057	0.251428
GADD45G	0.049	0.325376
BID	0.111	0.0254421
GLA	0.065	0.192916
RIPK2	0.223	6.02e-06
MCOLN1	0.127	0.0103927
LACTB	-0.221	7.1e-06
EIF4EBP1	0.147	0.00303259
GM2A	-0.171	0.000562233
EPSTI1	-0.041	0.408474
TNFAIP2	-0.027	0.586391
ECE1	0.007	0.881212
MYO6	0.09	0.0692089
RPS6KA1	-0.175	0.000388203
FKBP11	-0.103	0.0387036
IDH2	0.105	0.0339107
AP1B1	0.073	0.142
RBFOX2	0.061	0.217425
MAP3K8	0.014	0.785641
DSE	0.024	0.629964
MAGED2	0.057	0.251137
PRMT9	-0.066	0.185036
SOAT1	0.037	0.4518
PRAF2	0.108	0.0297429
ITPR2	-0.06	0.228529
TSPAN9	0.032	0.524187
SGCB	-0.019	0.705793
OPTN	-0.033	0.504959
UNC93B1	-0.101	0.0417259
ZNF385A	-0.222	6.66e-06
RNF149	-0.098	0.0497474
ATF5	-0.028	0.576708
TCOF1	0.131	0.00825173
ODF2L	-0.005	0.923649
TSHZ2	-0.101	0.041883
TMEM51	-0.076	0.128116
NAMPT	-0.01	0.834699
MAGED1	0.151	0.0022731
FBXO32	0.093	0.0609806
MARCKSL1	0.189	0.000135334
PLAC8	-0.137	0.00585055
ADPGK	-0.085	0.0886854
REXO2	0.072	0.150163
GADD45A	-0.118	0.0179145
HEG1	-0.089	0.0720433
ACTN4	0.125	0.0118171
CTNNAL1	0.171	0.000563035
DNAJA4	-0.017	0.726643
PKIB	0.071	0.15341
SCO2	-0.167	0.000728732
ZEB1	-0.05	0.318013
HOPX	0.062	0.210027
LHFPL2	-0.172	0.000496446
SLC38A1	0.076	0.127313
ANXA6	-0.021	0.667337
CCL2	0.033	0.502747
CD320	0.053	0.28916
SLC40A1	-0.065	0.19035
PBXIP1	0.006	0.905433
NCOA7	-0.057	0.253803
MYC	-0.035	0.477892
SELP	-0.019	0.69733
VWF	-0.13	0.00869433
ACKR1	-0.092	0.064766
CCL14	0.019	0.701367
RAMP3	-0.122	0.0143555
EMCN	-0.049	0.32583
ECSCR	-0.103	0.0380975
ZNF385D	0.002	0.96281
PLVAP	-0.061	0.220456
IL33	-0.202	4.34e-05
ADM5	0.091	0.0668425
ADGRL4	-0.097	0.0517826
FAM167B	-0.11	0.0275061
EGFL7	0	0.992641
NOSTRIN	-0.083	0.0952164
SELE	0.107	0.0312805
RAMP2	-0.042	0.396211
CLEC14A	-0.143	0.00384821
CALCRL	-0.093	0.0601226
CLDN5	-0.102	0.0393798
CPXM2	0.006	0.908285
RAB3C	-0.003	0.947005
PCAT19	-0.011	0.831716
ADAMTS9	-0.039	0.436547
OLFM1	-0.014	0.776266
C2CD4B	0.05	0.317252
TGFBR3	0.058	0.241192
MMRN1	-0.147	0.00301507
CD93	-0.074	0.137519
MYCT1	-0.074	0.138088
MMRN2	-0.05	0.315351
CD34	-0.072	0.150487
PCDH17	-0.036	0.471102
JAM2	-0.082	0.100229
COL15A1	0.015	0.760241
CCL23	0.002	0.974668
MEOX1	0.003	0.957709
SLCO2A1	-0.065	0.189906
TMEM255B	-0.085	0.0880297
IL3RA	-0.1	0.0436309
CYYR1	-0.157	0.00157477
NRN1	-0.04	0.426519
TM4SF18	-0.031	0.537078
ESAM	-0.019	0.706664
THSD7A	-0.037	0.460581
C7	0.064	0.198211
FAM110D	-0.043	0.387315
ERG	-0.067	0.178081
CADM3-AS1	-0.061	0.21732
CDH5	-0.037	0.460219
CYTL1	0.021	0.667106
ROBO4	-0.032	0.523481
F8	0	0.993394
TIE1	-0.069	0.165933
GPR146	0.095	0.0549642
SOX17	-0.087	0.0819639
FLT1	-0.107	0.0319215
MCTP1	-0.132	0.00790986
PTPRB	-0.055	0.267231
RND1	0.033	0.514079
IPO11	-0.014	0.780954
UGCG	-0.035	0.476765
CD200	-0.044	0.372779
MTUS1	-0.05	0.312476
ADCY4	-0.079	0.113369
LDB2	-0.134	0.00709949
RBP5	-0.083	0.0953447
CNKSR3	0.03	0.550834
CPLX1	0	0.992618
TMEM88	-0.009	0.854907
VCAM1	-0.03	0.544786
PREX2	-0.056	0.261732
LGALS1	0.034	0.49276
CLEC1A	-0.019	0.702302
GALNT18	-0.123	0.0134488
ICAM2	-0.236	1.52e-06
EVA1C	-0.044	0.380804
MATN2	0.037	0.458304
LIFR	0.078	0.115616
CCDC85B	-0.038	0.449076
RHOJ	-0.064	0.195324
PLCB4	-0.053	0.28353
ARHGEF15	0.005	0.921695
HHEX	-0.036	0.46983
S1PR1	-0.073	0.142391
ARRDC3	-0.104	0.0370979
SEMA6A	-0.022	0.662339
TGFBR2	-0.121	0.0146089
IL6	0.056	0.263085
RASIP1	-0.04	0.417768
ATP8B1	-0.018	0.719982
RALGAPA2	0.156	0.00169615
CCDC69	-0.071	0.1521
TNFSF10	-0.094	0.058771
PIM3	-0.029	0.563833
THBD	-0.145	0.00341442
PKP4	-0.077	0.120509
ADAMTS1	-0.003	0.952697
ANKRD29	-0.002	0.961032
CLIC2	-0.006	0.906343
SOX18	-0.084	0.0926886
CDKN3	0.174	0.000450659
APLNR	-0.001	0.977191
LRRC32	-0.05	0.316684
APOLD1	0.025	0.619045
MFNG	-0.149	0.00264099
IFI16	-0.203	3.81e-05
ABCD4	-0.196	7.45e-05
LMO2	-0.2	5.25e-05
IL1R1	0.128	0.010038
EMP3	-0.061	0.217138
TEK	-0.096	0.0546863
RPGR	0.096	0.0531181
SOCS2	0.069	0.168304
NDRG1	-0.04	0.420155
IL6ST	-0.125	0.0119054
TESC	-0.01	0.834732
DLC1	-0.065	0.189763
ARL4A	-0.073	0.141434
GLIPR1	-0.078	0.119244
LPAR6	-0.277	1.36e-08
SCARF1	-0.131	0.0085452
GIMAP8	-0.211	1.8e-05
ITPRIP	-0.064	0.198456
KTN1	-0.011	0.819113
CEBPB	-0.089	0.072513
KDR	-0.079	0.110845
ELMO1	-0.005	0.918724
FRY	-0.049	0.3258
CMIP	-0.084	0.0895995
FLI1	-0.138	0.00536615
IFI44L	-0.056	0.263839
KANK3	-0.087	0.0801418
VAMP5	-0.11	0.0273629
BMP4	0.002	0.974046
PDK4	0.063	0.203012
GIMAP6	-0.23	2.96e-06
NEDD9	0.089	0.0723664
ELK3	-0.091	0.066216
GIMAP1	-0.169	0.000625796
CRIM1	0.093	0.0628081
SMAD1	0.054	0.275159
ARGLU1	-0.01	0.834921
FOSL2	0.128	0.00998506
ITGA5	-0.006	0.910829
MYH9	0.074	0.136724
KIAA0355	0.125	0.0116016
PNP	-0.054	0.278835
SASH1	0.034	0.490913
LRRC1	0.103	0.0391893
EHD4	0.017	0.73315
TCN2	0.042	0.394351
ST6GAL1	0.005	0.927811
EXOC6	0.037	0.459092
ACVRL1	-0.1	0.0439571
PLXND1	-0.008	0.865314
SNRK	-0.019	0.699813
EDN1	0.011	0.825184
ENTPD1	-0.05	0.312058
PIK3R3	-0.007	0.891328
DUSP5	-0.085	0.086801
YPEL2	0.074	0.138844
SMS	0.274	2.16e-08
EFNA1	0.075	0.133956
CBR1	-0.009	0.850944
TNS2	-0.103	0.0384296
PMM1	0.125	0.0116574
RUNX1	-0.039	0.430954
CPNE8	-0.014	0.775868
HDDC2	-0.227	3.76e-06
PROS1	0.012	0.804877
MT1E	-0.056	0.262953
JMJD1C	-0.074	0.138367
LIMCH1	0.007	0.891134
APOBEC3C	-0.159	0.00128966
SNHG7	-0.03	0.541783
PIK3C2A	0.002	0.963308
CDKN1A	-0.261	1.04e-07
IFI27L2	-0.279	1.06e-08
ANGPT2	-0.094	0.0582885
CCDC3	-0.126	0.0113998
ABLIM1	-0.1	0.0450858
SEC14L1	0.03	0.543377
AREG	0.081	0.104421
TMEM173	-0.227	3.77e-06
TSTD1	0.129	0.0095008
FAM43A	-0.019	0.704597
GLIPR2	0.004	0.929422
ATP1B1	-0.104	0.0370151
EZR	-0.026	0.603185
COX7A1	-0.072	0.150153
LUZP1	0.023	0.644153
SPTLC2	-0.028	0.569112
CRIP1	-0.098	0.0490508
NUDT1	0.251	3.08e-07
LIMS2	-0.059	0.2358
PDXK	0.132	0.00774371
MAPKAPK3	-0.059	0.234662
ANTXR2	-0.052	0.299011
CIB1	-0.228	3.6e-06
CMTM6	0.109	0.0281955
GFOD2	0.117	0.0185411
LAMA5	-0.094	0.0578504
ARL5B	0.237	1.42e-06
BIN1	-0.051	0.305964
AKR1B1	0.117	0.0185893
IAH1	0.114	0.0221474
DNPH1	0.028	0.578255
DOCK9	0.01	0.838367
PLPP3	-0.036	0.4696
C1orf21	0.048	0.33617
ABRACL	0.086	0.0829086
CYGB	-0.151	0.00239079
CEP68	0.092	0.0655439
CCNDBP1	-0.208	2.34e-05
MAF	-0.098	0.0477486
PTGDS	0.003	0.945102
LITAF	-0.135	0.00667521
CNTNAP3B	0.074	0.13768
FNIP2	0.101	0.0426398
HLX	-0.088	0.0754044
UQCRC1	-0.075	0.130559
ICA1	0.072	0.14835
MLKL	-0.175	0.000394065
CARD8	-0.04	0.422422
BCR	-0.004	0.932124
PMAIP1	-0.04	0.4189
PHACTR2	0.134	0.00682609
CCDC107	0.022	0.663452
TMEM70	0.092	0.0649853
MAP3K11	0.049	0.320874
GRAMD1A	-0.001	0.976705
IL15	-0.14	0.00473957
LPCAT4	-0.161	0.00115949
GNAQ	0.152	0.00210963
HIPK3	-0.089	0.0722758
SNTB2	-0.014	0.778576
ZFAND2A	0.061	0.223093
AQP3	-0.113	0.0229264
TOB1	0.044	0.37982
HOXB4	-0.132	0.00766809
YES1	0.238	1.28e-06
NUAK1	-0.014	0.776203
NTM	0	0.994572
DIO2	0.001	0.978226
COL10A1	0.058	0.246171
HTRA3	-0.01	0.83765
MMP11	0.071	0.151279
CDH11	-0.023	0.649174
GREM1	0.059	0.234932
RCN3	0.066	0.182814
LAMP5	0.021	0.672237
SPON2	-0.011	0.830063
COL5A1	0.007	0.88659
ADAMTS2	0.001	0.987711
SULF1	-0.008	0.86522
SFRP2	0.044	0.382554
MFAP2	0.241	9.05e-07
THBS2	0.041	0.413239
EMILIN1	-0.011	0.828092
CREB3L1	-0.077	0.123763
CTSK	0.001	0.976395
COL11A1	0.021	0.672656
WNT2	-0.001	0.980232
PCDH7	-0.025	0.620079
PRRX1	0.017	0.72603
SFRP4	0.029	0.555345
ISLR	0.009	0.857489
ASPN	-0.013	0.797479
TGFB3	-0.008	0.874967
FBLN2	0.08	0.110122
MEG3	-0.046	0.359922
NKD2	0.179	0.000286551
IGFL2	0.099	0.0470336
DDR2	-0.004	0.938514
NID2	0.044	0.373713
CD248	-0.003	0.954617
TMEM119	-0.07	0.159217
LRRC17	-0.056	0.264769
CPXM1	-0.004	0.928675
GRP	-0.025	0.621289
FNDC1	0.041	0.415052
BICC1	0.076	0.126915
MFAP5	0.042	0.404058
C1QTNF3	0.022	0.665784
RARRES2	-0.002	0.974723
ADAM12	0.055	0.273613
TNFAIP6	0.003	0.951111
GGT5	-0.088	0.0783915
PLPP4	0.028	0.575401
ITGBL1	0	0.996061
PDPN	-0.05	0.315582
PDGFRB	-0.015	0.763875
OLFML1	-0.031	0.532865
FMOD	-0.028	0.572935
PYCR1	0.25	3.52e-07
SPON1	-0.011	0.821598
ADAMTS12	0.038	0.451559
UCHL1	0.151	0.00224372
OLFML3	-0.048	0.334152
NDN	-0.032	0.526402
GPC6	0.023	0.640892
FAM19A5	-0.004	0.935787
MMP23B	0.099	0.0466857
HSD17B6	0.102	0.0398711
FIBIN	0.03	0.551476
HEPH	0.001	0.977078
C1QTNF6	0.092	0.063152
ECM1	-0.004	0.934843
PTGER3	0.07	0.160514
NOX4	-0.079	0.112965
KANK4	0.082	0.0995989
MAP1A	0.029	0.557158
SGIP1	-0.025	0.617133
PDLIM2	0.005	0.91339
SCARF2	-0.002	0.972633
ENC1	-0.041	0.411947
SRPX2	-0.226	4.5e-06
CYP1B1	0.115	0.0206705
OLFML2B	0.082	0.0992815
EPYC	0.032	0.525797
FKBP7	0.047	0.346014
TWIST1	0.107	0.0308267
LOX	0.026	0.603457
PDGFRL	0.152	0.00209229
CNN1	-0.03	0.548099
KIAA1217	0.095	0.0554374
CES1	-0.057	0.250539
RNF144A	0.248	4.43e-07
GAS1	0.075	0.132522
MSC	-0.042	0.396706
BMP1	0.012	0.804569
BASP1	0.085	0.0886563
MFAP4	-0.032	0.524378
P3H1	0.025	0.614412
MXRA5	-0.092	0.0657282
PAPPA	-0.055	0.266166
P3H3	0.17	0.000571525
COMP	-0.039	0.436266
BNC2	0.037	0.459608
MEST	0.128	0.00967195
APCDD1	-0.112	0.0247055
CLDN11	0.027	0.589083
SEPT11	0.166	0.000800131
P3H4	0.049	0.322378
COL16A1	0.019	0.701952
GALNS	-0.16	0.00121979
UNC5B	-0.201	4.49e-05
TDO2	0.061	0.222601
MOXD1	-0.005	0.927286
EPDR1	0	0.998839
NEXN	-0.09	0.0703083
PODNL1	-0.018	0.713385
CLMP	0.062	0.21578
P4HA3	0.079	0.112768
INAFM1	0.078	0.119406
NKD1	-0.034	0.499106
OMD	0.007	0.882537
RGS4	0.037	0.46036
PLXDC1	-0.004	0.932503
CARMN	-0.049	0.3227
STEAP1	0.061	0.222996
TMEM204	-0.214	1.43e-05
CH25H	-0.058	0.24774
PAM	-0.097	0.0519851
THBS3	0.035	0.48462
MYH10	0.194	8.2e-05
KIF26B	-0.007	0.884503
LSAMP	-0.084	0.0908102
MRGPRF	-0.02	0.6952
MITF	-0.172	0.000518157
TTC3	0.147	0.00305465
CHN1	0.029	0.553887
FST	0.061	0.219379
QPRT	0.206	3.04e-05
GPX7	0.11	0.0267371
RAB23	0.122	0.0140901
RARRES1	0.181	0.000250737
ITGA1	-0.089	0.0739852
SMARCA1	-0.016	0.743476
GULP1	0.015	0.763936
KIAA0930	-0.086	0.0846508
NID1	-0.007	0.890107
HES4	-0.025	0.610875
DBN1	0.102	0.0406704
CTSF	-0.019	0.700027
SPSB1	-0.017	0.734413
MARVELD1	-0.191	0.000112551
MMP7	-0.042	0.395596
HEY1	0.115	0.0202936
ANGPTL2	-0.031	0.536233
CPQ	-0.1	0.0452927
STK3	0.287	4.05e-09
MAGEH1	0.067	0.1771
MATN3	0.014	0.776541
CRABP2	0.139	0.00523334
ARF4	0.083	0.0945276
LMO7	0.005	0.924032
ACTG2	-0.029	0.554241
CTSO	-0.164	0.000923021
NME4	-0.043	0.387274
VASN	0.071	0.154292
DAPK3	0.012	0.813987
SULF2	-0.008	0.867462
TCF12	-0.039	0.439558
TMEM158	0.009	0.85537
SUGCT	-0.017	0.735345
KIFAP3	0.152	0.00210966
SMARCB1	0.033	0.503059
SLC39A13	-0.027	0.587943
TMEM263	0.034	0.492063
SLC39A7	0.168	0.000678273
NXN	-0.059	0.237946
VSNL1	-0.061	0.222665
NR2F1	-0.083	0.0939293
VCL	-0.006	0.900731
YIF1A	0.089	0.0731237
SLC44A1	0.134	0.00676185
HCFC1R1	-0.074	0.135247
FKBP14	0.105	0.0355283
CALB2	-0.006	0.909514
ST5	-0.112	0.023739
F2R	-0.014	0.779811
MMD	0.193	9.36e-05
WNT5A	-0.139	0.00494149
LRRFIP1	-0.13	0.00889458
TPM3	0.262	8.66e-08
TMC6	-0.006	0.896715
UPP1	0.085	0.0864157
NUDT14	-0.165	0.000846468
FRMD4B	-0.027	0.582885
FAM129A	0.016	0.752359
CCNL1	0.024	0.624367
LYSMD2	-0.2	4.85e-05
CKS2	0.237	1.48e-06
JUND	-0.003	0.944964
CSRNP1	-0.002	0.963139
BAG3	-0.104	0.036654
MYH11	-0.043	0.392825
SOD3	-0.005	0.916874
RGS5	-0.055	0.273221
NDUFA4L2	-0.125	0.0115389
EFHD1	-0.029	0.558387
SGCA	-0.029	0.562285
RERGL	0.036	0.473574
TPPP3	-0.022	0.660843
SYNPO2	-0.058	0.245115
LGI4	0.025	0.61569
SMOC2	-0.038	0.44692
PLAC9	-0.027	0.582211
PLN	-0.041	0.410431
FRZB	-0.048	0.3395
LMOD1	-0.045	0.365479
PTP4A3	0.035	0.488166
ITGA7	0.06	0.23043
HIGD1B	-0.144	0.00377766
FHL5	-0.112	0.0236675
NTRK2	-0.088	0.0774597
PPP1R14A	-0.009	0.856329
RERG	0.038	0.44157
COX4I2	-0.095	0.055384
FXYD1	0.046	0.356102
KCNJ8	0.041	0.41506
COL14A1	-0.004	0.933157
WFDC1	-0.078	0.115694
NOTCH3	-0.07	0.162109
SLIT3	-0.123	0.0135732
AOC3	-0.011	0.830019
CRISPLD2	0.051	0.309044
HRH2	-0.031	0.532888
CDH6	-0.1	0.0434119
C1QTNF2	0.049	0.32801
RCAN2	-0.081	0.103734
TBX2-AS1	0.072	0.149478
RASL12	0.007	0.886174
EGFL6	-0.024	0.624533
C2orf40	0.002	0.973997
SEPT4	0.004	0.929071
GJA4	-0.084	0.0909004
PTGIR	-0.014	0.786424
TBX2	0.055	0.271389
EBF1	-0.024	0.634477
PPP1R12B	0.017	0.73155
SBSPON	0.096	0.0545299
FOXS1	-0.09	0.0699194
NR2F2-AS1	-0.053	0.288258
PRELP	-0.087	0.0797961
S100A10	-0.008	0.872969
MAP3K7CL	-0.128	0.0101809
MRVI1	-0.055	0.266603
CLMN	0.13	0.00898324
FHL1	0.015	0.761229
PARM1	0.082	0.0974701
HSPB2	-0.057	0.256415
HEY2	-0.16	0.00126188
KCNMB1	-0.068	0.173381
KCNE4	-0.045	0.369122
HSPB6	0.027	0.588358
C1QTNF1	0.027	0.583155
FOXC2	-0.049	0.327813
SAT1	-0.112	0.0240631
AGT	-0.057	0.250676
ISYNA1	0.014	0.779311
DMPK	0.044	0.38044
LURAP1L	-0.073	0.145056
CCDC102B	-0.027	0.583216
FILIP1	0.025	0.615302
SORBS2	0.004	0.938004
PGF	-0.15	0.002489
MT1M	-0.003	0.957932
MGST3	0.194	8.43e-05
EDIL3	-0.048	0.337638
CAP2	0.106	0.0336252
SELENBP1	-0.04	0.426278
TMEM47	-0.082	0.101183
PLEKHA4	0.065	0.192809
ZNF703	-0.005	0.92029
LPP	-0.046	0.350746
ESD	-0.254	2.3e-07
NUDT4	-0.11	0.0268681
TNS1	-0.085	0.0887766
TUSC1	0.11	0.0265485
UBA2	0.262	8.58e-08
GEM	0.044	0.374405
SPCS3	-0.097	0.0499365
HMGN1	0.136	0.00615416
ADCY3	0.087	0.0817317
CASP4	-0.271	3.03e-08
PPP1R12A	-0.061	0.218552
ARHGAP10	0.106	0.0335941
PDGFA	-0.097	0.0520091
TMEM38B	0.178	0.000329258
FGF7	0.033	0.511666
FLNA	-0.003	0.947787
C4orf48	-0.012	0.805734
CDC42EP3	0.056	0.260659
CHST11	0.001	0.977483
PHLDB2	-0.09	0.0715901
SSBP2	-0.028	0.578205
CNDP2	-0.062	0.210016
SERPINB1	-0.097	0.0507144
CFL2	0.034	0.496345
MAP7D3	0.037	0.455902
CMTM7	-0.023	0.642821
QPCT	0.034	0.492871
SMAGP	0.228	3.57e-06
KLF9	-0.01	0.837903
RRAD	-0.023	0.64884
ANKRD28	0.16	0.00119611
MAPRE2	-0.096	0.0531822
PARVB	-0.03	0.545347
FADS3	-0.012	0.814886
STMN1	0.317	6.55e-11
TBC1D1	0.159	0.00132825
CBX6	0.043	0.386382
COBLL1	-0.12	0.0154972
HEXIM1	-0.111	0.0256463
DUSP4	-0.116	0.0194742
EPN2	0.102	0.0406281
IMPDH2	-0.187	0.000148297
ST6GALNAC6	-0.041	0.410443
HSPA2	0.058	0.245246
SLC25A4	0.01	0.847045
RASD1	-0.113	0.0233313
MTHFD2	0.206	3e-05
SORBS3	0.002	0.967672
OAT	-0.121	0.0151358
CDC42EP4	-0.048	0.332792
CABIN1	-0.006	0.904313
ABTB1	-0.113	0.022545
NFIA	-0.018	0.712661
PACSIN2	-0.054	0.276483
PBK	0.111	0.0254764
RRM2	0.172	0.000514675
CDC20	0.261	1.04e-07
DEPDC1	0.297	1.11e-09
BIRC5	0.265	6.14e-08
ANLN	0.281	8.84e-09
NUF2	0.333	5.86e-12
SPC25	0.219	8.92e-06
CCNB2	0.244	6.38e-07
TOP2A	0.316	7.76e-11
NCAPG	0.179	0.000291795
PRC1	0.25	3.39e-07
DIAPH3	0.224	5.5e-06
CDCA3	0.302	5.47e-10
MKI67	0.257	1.56e-07
AURKB	0.24	1.05e-06
ASPM	0.238	1.26e-06
HMMR	0.249	4.02e-07
CKAP2L	0.294	1.63e-09
TPX2	0.352	3.16e-13
KIF4A	0.313	1.23e-10
CENPF	0.291	2.38e-09
GTSE1	0.246	5.1e-07
CDCA8	0.329	1.14e-11
NEK2	0.337	3.46e-12
KIF23	0.264	7.04e-08
KIF2C	0.282	8.13e-09
PLK1	0.241	8.92e-07
CCNB1	0.162	0.00108025
CENPA	0.331	8.67e-12
FOXM1	0.312	1.36e-10
KIFC1	0.298	9.89e-10
UBE2C	0.365	3.31e-14
CDCA2	0.172	0.000502418
TROAP	0.31	1.73e-10
TTK	0.349	4.8e-13
CEP55	0.255	1.88e-07
NUSAP1	0.234	1.86e-06
CENPM	0.14	0.00470071
HJURP	0.243	7.62e-07
ASF1B	0.241	9.12e-07
MELK	0.312	1.43e-10
SPAG5	0.364	3.69e-14
MND1	0.125	0.0116703
CENPE	0.232	2.38e-06
AURKA	0.314	1.01e-10
TK1	0.181	0.00024803
ZWINT	0.233	2.13e-06
CDK1	0.233	2.22e-06
POC1A	0.266	5.56e-08
SPC24	0.175	0.000390335
DLGAP5	0.216	1.11e-05
CENPK	0.135	0.00664209
ORC6	0.229	3.14e-06
CDC45	0.214	1.41e-05
CDCA5	0.246	5.58e-07
CENPN	0.143	0.00382675
FAM83D	0.302	5.5e-10
MAD2L1	0.233	2.24e-06
CTSV	0.243	7.61e-07
ANXA3	0.064	0.196741
CENPW	0.12	0.0153321
RACGAP1	0.253	2.6e-07
UHRF1	0.196	7.36e-05
NDC80	0.269	3.71e-08
UBE2T	0.249	3.69e-07
RAD51AP1	0.25	3.39e-07
GGH	0.296	1.29e-09
CCNA1	0.03	0.553156
CENPH	0.108	0.0304722
KNSTRN	0.225	5.05e-06
GINS2	0.155	0.001737
CLSPN	0.232	2.37e-06
ZNF185	0.043	0.386965
ZWILCH	0.187	0.000157252
PSRC1	0.18	0.000264641
TACC3	0.189	0.00013169
EPHB2	0.139	0.00506236
LMNB2	0.168	0.00070431
NKILA	0.025	0.616554
FEN1	0.237	1.43e-06
KIF20B	0.19	0.000124571
GPSM2	0.231	2.61e-06
HMGB3	0.223	5.62e-06
IL11	0.093	0.0626736
PHF19	0.103	0.0387939
FOSL1	-0.024	0.633275
FBXO5	0.156	0.00164191
TYMS	0.149	0.00262234
SLC17A9	0.086	0.0825925
RNASEH2A	0.252	2.75e-07
CKS1B	0.284	6.35e-09
EPHX4	0.122	0.0138152
CD70	-0.066	0.18811
RFC4	0.28	9.62e-09
DTYMK	0.14	0.00487673
TMEM106C	0.211	1.9e-05
CDCA4	0.108	0.0304073
CKAP2	0.142	0.00425508
BCL2L12	0.258	1.32e-07
ITGB3BP	0.136	0.00595972
TEX30	0.242	8.39e-07
CCDC34	0.132	0.00800279
CD3EAP	0.209	2.21e-05
SMC2	0.25	3.3e-07
RANGAP1	0.013	0.801558
CSE1L	0.23	2.95e-06
ATAD3A	0.192	0.000101864
EMC9	-0.024	0.63474
SH2D4A	-0.056	0.258994
CST6	0.051	0.306872
UBE2S	0.302	5.27e-10
MZT1	0.091	0.0686261
PXMP2	0.129	0.00944825
CDKN2D	0.22	8.23e-06
UNC13D	0.043	0.385564
[truncated: 836 more rows]
