# Supplementary material for: Development and validation of an intra-tumor heterogeneity-related signature to predict prognosis of bladder cancer: a study based on single-cell RNA-seq
Source: Aging (Albany NY). 2021 Aug 2;13(15):19415–41. doi: 10.18632/aging.203353 (PMC8386527; doi:10.18632/aging.203353)
Supplement: Supplementary Table 7 [file aging-13-203353-s008.xls]

## Sheet: HRS_test_GSE13507
Supplementary Table 7. The HRS and risk grouping of the patients from GSE13507 cohort.
id	HRS	risk
GSM340633	0.322259	low
GSM340713	0.468752	low
GSM340735	0.468752	low
GSM340748	0.468752	low
GSM340756	0.468752	low
GSM340626	0.51486	low
GSM340671	0.645442	low
GSM340739	0.645442	low
GSM340607	0.72625	low
GSM340608	0.72625	low
GSM340650	0.72625	low
GSM340703	0.72625	low
GSM340712	0.72625	low
GSM340717	0.72625	low
GSM340693	0.755799	low
GSM340642	0.84533	low
GSM340686	0.84533	low
GSM340766	0.84533	low
GSM340769	0.84533	low
GSM340619	0.874851	low
GSM340695	0.874851	low
GSM340722	0.874851	low
GSM340723	0.874851	low
GSM340730	0.874851	low
GSM340736	0.874851	low
GSM340625	0.928479	low
GSM340670	0.938846	low
GSM340740	0.938846	low
GSM340613	1	low
GSM340654	1	low
GSM340690	1	low
GSM340645	1.30969	low
GSM340656	1.30969	low
GSM340669	1.30969	low
GSM340680	1.30969	low
GSM340707	1.30969	low
GSM340711	1.30969	low
GSM340726	1.30969	low
GSM340729	1.30969	low
GSM340737	1.30969	low
GSM340753	1.30969	low
GSM340630	1.32432	low
GSM340639	1.32432	low
GSM340640	1.32432	low
GSM340647	1.32432	low
GSM340648	1.32432	low
GSM340651	1.32432	low
GSM340653	1.32432	low
GSM340657	1.32432	low
GSM340665	1.32432	low
GSM340683	1.32432	low
GSM340687	1.32432	low
GSM340688	1.32432	low
GSM340689	1.32432	low
GSM340694	1.32432	low
GSM340697	1.32432	low
GSM340705	1.32432	low
GSM340710	1.32432	low
GSM340715	1.32432	low
GSM340721	1.32432	low
GSM340752	1.32432	low
GSM340754	1.32432	low
GSM340765	1.32432	low
GSM340611	1.35543	low
GSM340624	1.35543	low
GSM340681	1.35543	low
GSM340698	1.35543	low
GSM340702	1.35543	low
GSM340706	1.35543	low
GSM340718	1.35543	low
GSM340719	1.35543	low
GSM340768	1.35543	low
GSM340610	1.41058	low
GSM340620	1.41058	low
GSM340678	1.41058	low
GSM340741	1.41058	low
GSM340685	1.45458	low
GSM340606	1.53885	low
GSM340612	1.57767	low
GSM340637	1.57767	low
GSM340652	1.57767	low
GSM340720	1.57767	low
GSM340746	1.57767	low
GSM340614	2.0518	low
GSM340615	2.0518	low
GSM340616	2.0518	low
GSM340621	2.0518	low
GSM340622	2.0518	low
GSM340628	2.0518	low
GSM340632	2.0518	low
GSM340636	2.0518	low
GSM340643	2.0518	low
GSM340644	2.0518	low
GSM340658	2.0518	low
GSM340659	2.0518	low
GSM340661	2.0518	low
GSM340664	2.0518	low
GSM340666	2.0518	low
GSM340672	2.0518	low
GSM340675	2.0518	low
GSM340676	2.0518	low
GSM340677	2.0518	low
GSM340679	2.0518	low
GSM340684	2.0518	low
GSM340700	2.0518	low
GSM340732	2.0518	low
GSM340742	2.0518	low
GSM340745	2.0518	low
GSM340749	2.0518	low
GSM340750	2.0518	low
GSM340755	2.0518	low
GSM340757	2.0518	low
GSM340760	2.0518	low
GSM340767	2.0518	low
GSM340692	2.38822	high
GSM340744	2.38822	high
GSM340747	2.38822	high
GSM340762	2.38822	high
GSM340763	2.38822	high
GSM340764	2.38822	high
GSM340609	2.44433	high
GSM340617	2.44433	high
GSM340618	2.44433	high
GSM340634	2.44433	high
GSM340673	2.44433	high
GSM340674	2.44433	high
GSM340682	2.44433	high
GSM340716	2.44433	high
GSM340725	2.44433	high
GSM340727	2.44433	high
GSM340733	2.44433	high
GSM340758	2.44433	high
GSM340759	2.44433	high
GSM340667	2.62313	high
GSM340738	2.62313	high
GSM340605	3.70014	high
GSM340623	3.70014	high
GSM340627	3.70014	high
GSM340629	3.70014	high
GSM340631	3.70014	high
GSM340635	3.70014	high
GSM340638	3.70014	high
GSM340641	3.70014	high
GSM340646	3.70014	high
GSM340649	3.70014	high
GSM340655	3.70014	high
GSM340660	3.70014	high
GSM340662	3.70014	high
GSM340663	3.70014	high
GSM340668	3.70014	high
GSM340691	3.70014	high
GSM340696	3.70014	high
GSM340699	3.70014	high
GSM340701	3.70014	high
GSM340704	3.70014	high
GSM340708	3.70014	high
GSM340714	3.70014	high
GSM340724	3.70014	high
GSM340728	3.70014	high
GSM340731	3.70014	high
GSM340734	3.70014	high
GSM340743	3.70014	high
GSM340751	3.70014	high
GSM340761	3.73511	high
GSM340709	6.1124	high
