# Supplementary material for: Development and validation of an intra-tumor heterogeneity-related signature to predict prognosis of bladder cancer: a study based on single-cell RNA-seq
Source: Aging (Albany NY). 2021 Aug 2;13(15):19415–41. doi: 10.18632/aging.203353 (PMC8386527; doi:10.18632/aging.203353)
Supplement: Supplementary Table 14 [file aging-13-203353-s010.xls]

## Sheet: GSEA_high_HRS
Supplementary Table 14. The results of GSEA analysis for the cases with high-HRS in TCGA-BLCA dataset.
NAME	GS<br> follow link to MSigDB	GS DETAILS	SIZE	ES	NES	NOM p-val	FDR q-val	FWER p-val	RANK AT MAX	LEADING EDGE
HALLMARK_G2M_CHECKPOINT	HALLMARK_G2M_CHECKPOINT	Details ...	195	0.659848	3.14036	0	0	0	9979	tags=57%, list=19%, signal=70%
HALLMARK_EPITHELIAL_MESENCHYMAL_TRANSITION	HALLMARK_EPITHELIAL_MESENCHYMAL_TRANSITION	Details ...	199	0.646949	3.06308	0	0	0	5451	tags=51%, list=10%, signal=57%
HALLMARK_E2F_TARGETS	HALLMARK_E2F_TARGETS	Details ...	198	0.614865	2.90522	0	0	0	9183	tags=48%, list=17%, signal=58%
HALLMARK_MITOTIC_SPINDLE	HALLMARK_MITOTIC_SPINDLE	Details ...	198	0.572677	2.69682	0	0	0	7703	tags=46%, list=14%, signal=54%
HALLMARK_TNFA_SIGNALING_VIA_NFKB	HALLMARK_TNFA_SIGNALING_VIA_NFKB	Details ...	199	0.545704	2.58314	0	0	0	7095	tags=43%, list=13%, signal=49%
HALLMARK_MTORC1_SIGNALING	HALLMARK_MTORC1_SIGNALING	Details ...	195	0.537147	2.55344	0	0	0	11608	tags=49%, list=22%, signal=62%
HALLMARK_INFLAMMATORY_RESPONSE	HALLMARK_INFLAMMATORY_RESPONSE	Details ...	199	0.491341	2.31818	0	0	0	7190	tags=35%, list=13%, signal=40%
HALLMARK_UV_RESPONSE_DN	HALLMARK_UV_RESPONSE_DN	Details ...	143	0.499035	2.24333	0	0	0	7275	tags=40%, list=14%, signal=46%
HALLMARK_HYPOXIA	HALLMARK_HYPOXIA	Details ...	199	0.473749	2.23447	0	0	0	9860	tags=40%, list=18%, signal=49%
HALLMARK_TGF_BETA_SIGNALING	HALLMARK_TGF_BETA_SIGNALING	Details ...	53	0.590823	2.22514	0	0	0	5368	tags=42%, list=10%, signal=46%
HALLMARK_COAGULATION	HALLMARK_COAGULATION	Details ...	138	0.467874	2.1174	0	0	0	7137	tags=31%, list=13%, signal=36%
HALLMARK_ANGIOGENESIS	HALLMARK_ANGIOGENESIS	Details ...	36	0.615855	2.11272	0	0	0	9385	tags=53%, list=18%, signal=64%
HALLMARK_ANDROGEN_RESPONSE	HALLMARK_ANDROGEN_RESPONSE	Details ...	98	0.494107	2.09728	0	0	0	7157	tags=38%, list=13%, signal=44%
HALLMARK_KRAS_SIGNALING_UP	HALLMARK_KRAS_SIGNALING_UP	Details ...	199	0.444129	2.0914	0	0	0	5140	tags=28%, list=10%, signal=31%
HALLMARK_PROTEIN_SECRETION	HALLMARK_PROTEIN_SECRETION	Details ...	96	0.483443	2.0598	0	0	0	10833	tags=42%, list=20%, signal=52%
HALLMARK_APICAL_JUNCTION	HALLMARK_APICAL_JUNCTION	Details ...	199	0.411311	1.94476	0	0.000236577	0.003	10242	tags=36%, list=19%, signal=44%
HALLMARK_GLYCOLYSIS	HALLMARK_GLYCOLYSIS	Details ...	196	0.412869	1.9399	0	0.000382219	0.005	3072	tags=24%, list=6%, signal=26%
HALLMARK_COMPLEMENT	HALLMARK_COMPLEMENT	Details ...	200	0.406435	1.93466	0	0.000360985	0.005	8289	tags=32%, list=16%, signal=37%
HALLMARK_ESTROGEN_RESPONSE_EARLY	HALLMARK_ESTROGEN_RESPONSE_EARLY	Details ...	198	0.398897	1.89529	0	0.000480677	0.007	6252	tags=30%, list=12%, signal=34%
HALLMARK_IL2_STAT5_SIGNALING	HALLMARK_IL2_STAT5_SIGNALING	Details ...	198	0.393297	1.87504	0	0.000516643	0.008	4652	tags=24%, list=9%, signal=26%
HALLMARK_MYC_TARGETS_V1	HALLMARK_MYC_TARGETS_V1		196	0.385533	1.81963	0	0.000635981	0.01	13823	tags=34%, list=26%, signal=46%
HALLMARK_UNFOLDED_PROTEIN_RESPONSE	HALLMARK_UNFOLDED_PROTEIN_RESPONSE		109	0.40425	1.7818	0	0.000862406	0.014	10029	tags=37%, list=19%, signal=45%
HALLMARK_HEDGEHOG_SIGNALING	HALLMARK_HEDGEHOG_SIGNALING		36	0.497203	1.74599	0.00174216	0.00117143	0.02	8247	tags=33%, list=15%, signal=39%
HALLMARK_ESTROGEN_RESPONSE_LATE	HALLMARK_ESTROGEN_RESPONSE_LATE		198	0.348782	1.64454	0	0.00332064	0.056	5659	tags=27%, list=11%, signal=30%
HALLMARK_PI3K_AKT_MTOR_SIGNALING	HALLMARK_PI3K_AKT_MTOR_SIGNALING		105	0.376671	1.6226	0.00170358	0.00378423	0.067	6148	tags=24%, list=12%, signal=27%
HALLMARK_P53_PATHWAY	HALLMARK_P53_PATHWAY		195	0.339549	1.60887	0	0.00459721	0.085	8781	tags=32%, list=16%, signal=39%
HALLMARK_APOPTOSIS	HALLMARK_APOPTOSIS		160	0.342304	1.5786	0	0.00617999	0.117	10803	tags=31%, list=20%, signal=39%
HALLMARK_APICAL_SURFACE	HALLMARK_APICAL_SURFACE		44	0.426653	1.57841	0.0173913	0.00595928	0.117	2512	tags=27%, list=5%, signal=29%
HALLMARK_MYC_TARGETS_V2	HALLMARK_MYC_TARGETS_V2		58	0.395649	1.55408	0.0159858	0.0075929	0.15	6279	tags=24%, list=12%, signal=27%
HALLMARK_HEME_METABOLISM	HALLMARK_HEME_METABOLISM		192	0.327774	1.5455	0.00159236	0.00789289	0.16	7310	tags=27%, list=14%, signal=31%
HALLMARK_IL6_JAK_STAT3_SIGNALING	HALLMARK_IL6_JAK_STAT3_SIGNALING		86	0.370615	1.54382	0.0135135	0.00777553	0.162	16088	tags=45%, list=30%, signal=65%
HALLMARK_SPERMATOGENESIS	HALLMARK_SPERMATOGENESIS		132	0.33089	1.49615	0.00489396	0.0113498	0.23	4040	tags=17%, list=8%, signal=19%
HALLMARK_CHOLESTEROL_HOMEOSTASIS	HALLMARK_CHOLESTEROL_HOMEOSTASIS		73	0.361816	1.45143	0.0206022	0.0167075	0.326	1645	tags=19%, list=3%, signal=20%
HALLMARK_WNT_BETA_CATENIN_SIGNALING	HALLMARK_WNT_BETA_CATENIN_SIGNALING		42	0.390929	1.40214	0.057041	0.0258841	0.474	9420	tags=33%, list=18%, signal=40%
HALLMARK_ALLOGRAFT_REJECTION	HALLMARK_ALLOGRAFT_REJECTION		195	0.275221	1.32117	0.0286624	0.0533395	0.738	5401	tags=16%, list=10%, signal=18%
HALLMARK_UV_RESPONSE_UP	HALLMARK_UV_RESPONSE_UP		156	0.281769	1.28277	0.0604575	0.0735107	0.846	7232	tags=21%, list=14%, signal=24%
HALLMARK_MYOGENESIS	HALLMARK_MYOGENESIS		197	0.263377	1.2525	0.0545171	0.0929406	0.925	8742	tags=24%, list=16%, signal=29%
HALLMARK_INTERFERON_GAMMA_RESPONSE	HALLMARK_INTERFERON_GAMMA_RESPONSE		197	0.239669	1.14112	0.172249	0.216882	0.998	11482	tags=25%, list=21%, signal=32%
HALLMARK_REACTIVE_OXYGEN_SPECIES_PATHWAY	HALLMARK_REACTIVE_OXYGEN_SPECIES_PATHWAY		49	0.300724	1.12756	0.254417	0.232435	0.999	4008	tags=14%, list=8%, signal=15%
HALLMARK_NOTCH_SIGNALING	HALLMARK_NOTCH_SIGNALING		32	0.306361	1.05451	0.357401	0.353619	1	10803	tags=31%, list=20%, signal=39%
HALLMARK_BILE_ACID_METABOLISM	HALLMARK_BILE_ACID_METABOLISM		112	0.232324	1.00043	0.42926	0.46222	1	4018	tags=14%, list=8%, signal=15%
HALLMARK_KRAS_SIGNALING_DN	HALLMARK_KRAS_SIGNALING_DN		197	0.204236	0.969302	0.546042	0.526226	1	7952	tags=19%, list=15%, signal=22%
