# Supplementary material for: Development and validation of an intra-tumor heterogeneity-related signature to predict prognosis of bladder cancer: a study based on single-cell RNA-seq
Source: Aging (Albany NY). 2021 Aug 2;13(15):19415–41. doi: 10.18632/aging.203353 (PMC8386527; doi:10.18632/aging.203353)
Supplement: Supplementary Table 15 [file aging-13-203353-s011.xls]

## Sheet: GSEA_low_HRS
Supplementary Table 15. The results of GSEA analysis for the cases with low-HRS in TCGA-BLCA dataset.
NAME	GS<br> follow link to MSigDB	GS DETAILS	SIZE	ES	NES	NOM p-val	FDR q-val	FWER p-val	RANK AT MAX	LEADING EDGE
HALLMARK_OXIDATIVE_PHOSPHORYLATION	HALLMARK_OXIDATIVE_PHOSPHORYLATION	Details ...	200	-0.385395	-1.93113	0	0.0012655	0.003	9942	tags=35%, list=19%, signal=42%
HALLMARK_DNA_REPAIR	HALLMARK_DNA_REPAIR	Details ...	148	-0.284665	-1.35208	0.0309859	0.125923	0.457	13876	tags=45%, list=26%, signal=60%
HALLMARK_PEROXISOME	HALLMARK_PEROXISOME	Details ...	104	-0.280601	-1.27457	0.070529	0.169013	0.716	14359	tags=45%, list=27%, signal=62%
HALLMARK_PANCREAS_BETA_CELLS	HALLMARK_PANCREAS_BETA_CELLS	Details ...	40	-0.32096	-1.2361	0.171765	0.173653	0.831	10855	tags=38%, list=20%, signal=47%
HALLMARK_XENOBIOTIC_METABOLISM	HALLMARK_XENOBIOTIC_METABOLISM	Details ...	198	-0.239238	-1.20307	0.0967742	0.178934	0.91	6852	tags=20%, list=13%, signal=23%
HALLMARK_ADIPOGENESIS	HALLMARK_ADIPOGENESIS	Details ...	198	-0.232951	-1.18306	0.0806452	0.175426	0.931	8699	tags=24%, list=16%, signal=28%
HALLMARK_FATTY_ACID_METABOLISM	HALLMARK_FATTY_ACID_METABOLISM	Details ...	157	-0.224174	-1.09158	0.254499	0.293083	0.997	11877	tags=34%, list=22%, signal=43%
HALLMARK_INTERFERON_ALPHA_RESPONSE	HALLMARK_INTERFERON_ALPHA_RESPONSE	Details ...	96	-0.199174	-0.890271	0.695864	0.741518	1	6812	tags=18%, list=13%, signal=20%
