# Supplementary material for: Development and validation of an intra-tumor heterogeneity-related signature to predict prognosis of bladder cancer: a study based on single-cell RNA-seq
Source: Aging (Albany NY). 2021 Aug 2;13(15):19415–41. doi: 10.18632/aging.203353 (PMC8386527; doi:10.18632/aging.203353)
Supplement: Supplementary Table 16 [file aging-13-203353-s012.xls]

## Sheet: All_limma
Supplementary Table 16. The differentially-expressed genes between high-HRS and low-HRS groups through limma.
gene	logFC	AveExpr	t	P.Value	adj.P.Val	B
ANLN	1.11299	3.3008	10.9879	1.05e-24	5.58e-20	45.277
CD109	1.16046	1.85533	8.74818	6.22e-17	1.66e-12	27.608
ITPRID2	0.812155	3.12564	8.46229	5.08e-16	9.05e-12	25.5398
SAFB2	-0.336546	3.4948	-8.38876	8.66e-16	1.02e-11	25.0154
FAM126A	0.55472	1.17215	8.3677	1.01e-15	1.02e-11	24.8659
CCDC130	-0.456467	3.33683	-8.34961	1.15e-15	1.02e-11	24.7376
AES	-0.614527	6.3375	-8.29336	1.72e-15	1.31e-11	24.34
ANXA1	1.37493	5.72393	8.04745	9.85e-15	6.58e-11	22.6241
ADCY7	0.537107	0.868029	7.91564	2.47e-14	1.39e-10	21.7197
ASCC3	0.493158	2.3884	7.9082	2.61e-14	1.39e-10	21.669
MBOAT2	0.77391	2.40702	7.83399	4.35e-14	2.11e-10	21.1649
ADAM9	0.77731	3.93989	7.78884	5.94e-14	2.64e-10	20.8599
SLC16A1	1.29943	2.73654	7.76726	6.89e-14	2.83e-10	20.7146
EGFR	1.0825	3.26569	7.73734	8.45e-14	3.22e-10	20.5136
ASAP1	0.580322	2.67157	7.65848	1.45e-13	5.15e-10	19.9866
RPP21	-0.442418	3.14896	-7.61878	1.89e-13	6.19e-10	19.7228
DSC2	1.1357	2.12101	7.61271	1.97e-13	6.19e-10	19.6825
CIRBP	-0.541844	4.98124	-7.56743	2.67e-13	7.6e-10	19.3832
RASAL2	0.413898	1.53283	7.56587	2.7e-13	7.6e-10	19.3728
LY6G5C	-0.316985	0.971937	-7.53772	3.26e-13	8.59e-10	19.1874
CCNYL1	0.517056	2.34315	7.5326	3.38e-13	8.59e-10	19.1537
RNF217	0.54158	1.16037	7.50909	3.95e-13	9.12e-10	18.9993
SAV1	0.399154	2.4277	7.50451	4.08e-13	9.12e-10	18.9692
PPFIBP1	0.538439	2.24585	7.50377	4.1e-13	9.12e-10	18.9644
BEND5	-0.710477	1.54252	-7.47456	4.98e-13	1.06e-09	18.7732
ZNF775	-0.362037	1.66829	-7.4605	5.47e-13	1.12e-09	18.6813
SGF29	-0.516865	3.22792	-7.45286	5.75e-13	1.14e-09	18.6315
STYX	0.334215	2.4024	7.4327	6.58e-13	1.26e-09	18.5001
CALU	0.646978	5.24187	7.39631	8.37e-13	1.54e-09	18.2636
AHNAK	0.786134	5.02224	7.37334	9.75e-13	1.69e-09	18.1148
PPP1R37	-0.60489	3.66693	-7.37252	9.8e-13	1.69e-09	18.1095
GNPNAT1	0.429812	2.98412	7.3392	1.22e-12	2e-09	17.8943
LINC01089	-0.592211	1.70861	-7.33573	1.25e-12	2e-09	17.872
AGER	-0.529179	1.91602	-7.33267	1.27e-12	2e-09	17.8522
FAM193B	-0.492759	3.08521	-7.30536	1.52e-12	2.33e-09	17.6765
WDR83	-0.366796	2.36635	-7.262	2.02e-12	3e-09	17.3985
CYP4F12	-1.17494	2.05108	-7.25728	2.09e-12	3.01e-09	17.3684
PRR14	-0.348737	3.78245	-7.24163	2.31e-12	3.25e-09	17.2684
GNA12	0.584404	3.61246	7.2328	2.45e-12	3.3e-09	17.212
CLASRP	-0.397383	3.48034	-7.23149	2.47e-12	3.3e-09	17.2037
B9D2	-0.43995	2.67088	-7.22617	2.56e-12	3.33e-09	17.1698
ZNF446	-0.331945	1.7726	-7.20963	2.85e-12	3.62e-09	17.0645
FRAT1	-0.356734	1.59397	-7.18325	3.38e-12	4.2e-09	16.8969
DIAPH3	0.476544	1.33638	7.17276	3.62e-12	4.39e-09	16.8304
DDX21	0.578115	4.34631	7.16928	3.7e-12	4.39e-09	16.8084
KIF20B	0.467646	1.81637	7.1636	3.84e-12	4.45e-09	16.7725
IPO7	0.473148	4.13167	7.14667	4.28e-12	4.86e-09	16.6654
SERPINB7	0.888842	0.748283	7.11562	5.23e-12	5.82e-09	16.4696
ZBTB48	-0.379316	2.66361	-7.10577	5.57e-12	6.02e-09	16.4076
NDUFA2	-0.420771	5.27191	-7.10389	5.64e-12	6.02e-09	16.3958
ATAT1	-0.532374	2.53606	-7.09811	5.85e-12	6.13e-09	16.3594
AC024060.1	-0.553237	2.54673	-7.09505	5.97e-12	6.13e-09	16.3402
USF2	-0.337221	4.75314	-7.08805	6.24e-12	6.29e-09	16.2962
CAV2	0.856608	3.07212	7.06456	7.25e-12	7.1e-09	16.1489
TMEM219	-0.455352	5.57837	-7.0632	7.32e-12	7.1e-09	16.1405
ARL6IP4	-0.324748	1.07412	-7.02376	9.41e-12	8.98e-09	15.8941
NDUFA3	-0.488268	4.51311	-7.01516	9.94e-12	9.09e-09	15.8405
PYCR2	-0.393393	4.55084	-7.01431	1e-11	9.09e-09	15.8352
YWHAG	0.426105	5.98093	7.01354	1e-11	9.09e-09	15.8304
SERPINB2	1.30861	1.40529	7.00538	1.06e-11	9.42e-09	15.7796
SNRNP70	-0.393956	5.7537	-6.98981	1.17e-11	1.02e-08	15.6828
RAB4B	-0.427687	2.51776	-6.98498	1.2e-11	1.04e-08	15.6528
SNRNP35	-0.323266	2.57787	-6.98142	1.23e-11	1.04e-08	15.6307
ARNTL2	0.763453	2.64489	6.97713	1.27e-11	1.05e-08	15.6041
CASP9	-0.351746	2.24186	-6.97527	1.28e-11	1.05e-08	15.5926
EHBP1	0.464605	2.43671	6.9708	1.32e-11	1.07e-08	15.5649
ZNF784	-0.434664	2.53202	-6.93636	1.64e-11	1.31e-08	15.3519
HMGA2	0.728168	0.585966	6.92449	1.77e-11	1.39e-08	15.2787
FOXN2	0.435553	2.0939	6.92093	1.81e-11	1.4e-08	15.2567
LRRC59	0.440938	5.32619	6.89839	2.08e-11	1.57e-08	15.1181
SEPT7	0.331239	3.86683	6.89774	2.09e-11	1.57e-08	15.114
ZNF688	-0.404802	2.40923	-6.89479	2.13e-11	1.58e-08	15.0959
FBP1	-1.33508	4.88489	-6.87975	2.34e-11	1.71e-08	15.0036
ZSCAN16	-0.589028	2.57451	-6.87189	2.46e-11	1.77e-08	14.9554
AC006942.1	-0.344388	0.815259	-6.85074	2.8e-11	2e-08	14.8259
FAM98C	-0.388335	2.47051	-6.84843	2.85e-11	2e-08	14.8118
IPMK	0.357098	1.55158	6.83579	3.08e-11	2.14e-08	14.7346
IGF2BP3	0.547194	0.660835	6.83362	3.12e-11	2.14e-08	14.7214
CYP4F23P	-1.14217	1.87332	-6.8254	3.29e-11	2.21e-08	14.6713
MTHFD1L	0.520625	2.9636	6.82365	3.32e-11	2.21e-08	14.6606
INHBA	0.963391	2.06325	6.82217	3.35e-11	2.21e-08	14.6516
ANXA2P2	0.666993	2.70241	6.81994	3.4e-11	2.21e-08	14.638
PPDPF	-0.611388	8.41208	-6.80707	3.68e-11	2.37e-08	14.5596
NUP205	0.427649	3.27916	6.79921	3.87e-11	2.46e-08	14.5119
SLC39A8	0.618727	1.94109	6.79643	3.94e-11	2.47e-08	14.495
MZF1	-0.447974	2.19839	-6.77369	4.53e-11	2.81e-08	14.3571
AC099518.2	-0.455958	0.710484	-6.75129	5.21e-11	3.2e-08	14.2215
PAM16	-0.35825	2.37738	-6.73991	5.59e-11	3.38e-08	14.1528
AL590428.1	0.0914127	0.103485	6.73712	5.68e-11	3.38e-08	14.1359
CNIH1	0.329462	3.80196	6.73523	5.75e-11	3.38e-08	14.1246
NDUFA1	-0.410426	6.90199	-6.73497	5.76e-11	3.38e-08	14.123
THAP3	-0.294813	2.27014	-6.7278	6.02e-11	3.49e-08	14.0798
ASAP2	0.538757	1.74691	6.72401	6.16e-11	3.54e-08	14.0569
MCFD2	0.454033	3.80738	6.71664	6.45e-11	3.65e-08	14.0126
SIGIRR	-0.578275	3.37644	-6.71566	6.49e-11	3.65e-08	14.0067
DSE	0.599307	1.50084	6.69611	7.32e-11	4.07e-08	13.8892
AHNAK2	0.970215	1.55292	6.69239	7.48e-11	4.12e-08	13.8668
ALKBH7	-0.4982	4.77771	-6.6875	7.71e-11	4.2e-08	13.8375
ZNF32	-0.414082	4.38782	-6.68508	7.83e-11	4.21e-08	13.823
ZNF296	-0.620998	2.32572	-6.68414	7.87e-11	4.21e-08	13.8174
ZNRD1	-0.370929	2.94505	-6.6799	8.08e-11	4.27e-08	13.792
IGF2BP2	1.08416	2.06095	6.66773	8.71e-11	4.56e-08	13.7191
ZBTB17	-0.282313	3.21956	-6.64803	9.82e-11	5.06e-08	13.6013
FGD4	0.327435	1.08178	6.64741	9.86e-11	5.06e-08	13.5977
FAM3B	-1.41803	2.85896	-6.62657	1.12e-10	5.7e-08	13.4734
CDK6	0.705173	1.6026	6.61924	1.17e-10	5.9e-08	13.4298
NPEPL1	-0.39586	1.85515	-6.61362	1.21e-10	6e-08	13.3964
DNAJC4	-0.409877	3.72467	-6.61198	1.22e-10	6e-08	13.3866
ZBED2	0.885827	1.18353	6.6119	1.22e-10	6e-08	13.3861
SLC39A14	0.618524	2.54791	6.61007	1.24e-10	6.01e-08	13.3753
COMMD3	-0.35063	3.09932	-6.60241	1.3e-10	6.21e-08	13.3298
MAGIX	-0.610395	1.47004	-6.60174	1.3e-10	6.21e-08	13.3258
ZNF692	-0.539445	3.36348	-6.59949	1.32e-10	6.24e-08	13.3124
YPEL3	-0.647873	4.47058	-6.59249	1.38e-10	6.46e-08	13.2709
SEC23A	0.452799	2.75384	6.58848	1.41e-10	6.56e-08	13.2472
ADAM17	0.568445	2.82593	6.58628	1.43e-10	6.59e-08	13.2342
PTPN12	0.462146	3.86479	6.58408	1.45e-10	6.62e-08	13.2211
ENDOD1	0.590136	3.37164	6.5822	1.47e-10	6.64e-08	13.21
AC009283.1	-0.545197	2.76916	-6.57504	1.53e-10	6.83e-08	13.1676
RNU5B-2P	-0.55595	1.64569	-6.57462	1.54e-10	6.83e-08	13.1651
ARHGAP29	0.60846	1.44511	6.57025	1.58e-10	6.96e-08	13.1393
PPFIBP2	-0.861751	2.71878	-6.55892	1.69e-10	7.39e-08	13.0723
MTIF3	-0.333671	4.59485	-6.55662	1.71e-10	7.44e-08	13.0587
ABTB1	-0.422896	2.6362	-6.55125	1.77e-10	7.62e-08	13.027
ZNF580	-0.430721	3.34124	-6.5492	1.79e-10	7.65e-08	13.0149
IPPK	0.373871	0.998705	6.54737	1.81e-10	7.68e-08	13.0041
AC073896.4	-0.532394	3.48549	-6.54494	1.84e-10	7.7e-08	12.9898
AL390719.2	-0.931212	2.56513	-6.54411	1.85e-10	7.7e-08	12.9849
NPC1	0.446663	2.37365	6.54186	1.87e-10	7.7e-08	12.9717
CAV1	1.12524	4.45214	6.54173	1.87e-10	7.7e-08	12.9709
ANXA2P1	0.162472	0.337511	6.53339	1.97e-10	8.03e-08	12.9218
FER1L4	-1.39571	3.66862	-6.53215	1.99e-10	8.03e-08	12.9145
PET100	-0.48018	3.77293	-6.52709	2.05e-10	8.22e-08	12.8848
SPAG9	0.392367	3.0023	6.52241	2.11e-10	8.39e-08	12.8572
EMP1	0.854429	3.73971	6.52044	2.13e-10	8.43e-08	12.8456
ECHDC2	-0.485617	2.5149	-6.51878	2.15e-10	8.45e-08	12.8359
AKAP8L	-0.328865	3.55408	-6.51262	2.23e-10	8.67e-08	12.7997
MAP7D3	0.423735	1.21468	6.51213	2.24e-10	8.67e-08	12.7968
PRNP	0.958597	5.5233	6.5009	2.4e-10	9.15e-08	12.7309
NOCT	0.473408	1.7665	6.50073	2.4e-10	9.15e-08	12.73
NBAS	0.294064	2.54367	6.49149	2.54e-10	9.6e-08	12.6758
PFDN5	-0.352275	6.12556	-6.49037	2.55e-10	9.6e-08	12.6693
WDR43	0.337404	3.84441	6.48876	2.58e-10	9.63e-08	12.6598
BLOC1S1	-0.441824	4.47467	-6.48651	2.61e-10	9.66e-08	12.6466
WDR83OS	-0.29954	5.46009	-6.48586	2.62e-10	9.66e-08	12.6429
GDPGP1	-0.240928	1.03816	-6.48334	2.66e-10	9.71e-08	12.6281
FN1	1.46998	5.65756	6.48268	2.67e-10	9.71e-08	12.6242
PLD1	0.420584	1.40186	6.47171	2.85e-10	1.03e-07	12.5601
PHF1	-0.346357	3.88602	-6.46263	3.01e-10	1.08e-07	12.5071
CCDC174	-0.351809	2.99544	-6.45861	3.09e-10	1.1e-07	12.4837
DXO	-0.324555	2.9815	-6.456	3.14e-10	1.11e-07	12.4684
NUS1P1	0.321885	0.916127	6.45515	3.15e-10	1.11e-07	12.4635
RSRP1	-0.515142	3.13045	-6.44583	3.33e-10	1.16e-07	12.4092
AL591895.1	-0.620391	3.53174	-6.4401	3.45e-10	1.19e-07	12.3758
PLK2	0.775019	3.42877	6.43964	3.46e-10	1.19e-07	12.3732
ZNF768	-0.372078	4.68614	-6.43243	3.61e-10	1.24e-07	12.3313
PLS3	0.60651	4.60066	6.42846	3.7e-10	1.26e-07	12.3082
AC108673.3	-0.418096	1.7293	-6.42347	3.81e-10	1.29e-07	12.2792
AL109811.2	-0.46618	1.71304	-6.41314	4.05e-10	1.36e-07	12.2193
MYO1E	0.495745	2.89795	6.41021	4.12e-10	1.38e-07	12.2023
CCT6A	0.410178	5.88959	6.40689	4.2e-10	1.39e-07	12.183
AC099850.3	0.730574	2.98097	6.40653	4.21e-10	1.39e-07	12.181
FAM229A	-0.332347	1.02355	-6.39169	4.6e-10	1.51e-07	12.0951
FAM3C2	0.537831	1.95652	6.38565	4.77e-10	1.55e-07	12.0601
TRPT1	-0.429837	3.87054	-6.38373	4.82e-10	1.56e-07	12.0491
THEM6	-0.801105	4.65304	-6.37855	4.97e-10	1.6e-07	12.0191
ERCC5	-0.297465	2.4895	-6.3742	5.1e-10	1.63e-07	11.994
EXOC5	0.318679	2.25492	6.37211	5.16e-10	1.63e-07	11.982
U2AF1L4	-0.361425	2.06619	-6.37141	5.19e-10	1.63e-07	11.9779
KLK6	1.28429	1.19142	6.37123	5.19e-10	1.63e-07	11.9769
RECQL	0.503524	2.59477	6.36855	5.27e-10	1.65e-07	11.9615
CYP4F29P	-0.813972	1.08224	-6.3596	5.56e-10	1.73e-07	11.9099
WASH9P	-0.347679	1.52775	-6.35815	5.61e-10	1.73e-07	11.9015
SMDT1	-0.414742	4.37538	-6.35636	5.67e-10	1.74e-07	11.8912
TNFRSF14	-0.548887	3.34828	-6.34986	5.89e-10	1.8e-07	11.8538
AGPS	0.345062	2.70593	6.34666	6e-10	1.81e-07	11.8354
F3	1.21382	3.53669	6.34652	6.01e-10	1.81e-07	11.8346
TNC	1.19975	2.9619	6.34576	6.03e-10	1.81e-07	11.8302
NEIL1	-0.520497	1.72794	-6.33255	6.52e-10	1.94e-07	11.7543
TEX2	0.352198	2.35224	6.33172	6.55e-10	1.94e-07	11.7496
TBC1D17	-0.321614	3.50212	-6.33075	6.59e-10	1.95e-07	11.744
THYN1	-0.392823	4.15714	-6.32787	6.71e-10	1.97e-07	11.7275
IGF2R	0.42399	3.22555	6.32678	6.75e-10	1.97e-07	11.7212
NUS1	0.293777	2.81901	6.32373	6.87e-10	1.99e-07	11.7038
DYRK1B	-0.5351	3.34276	-6.32323	6.89e-10	1.99e-07	11.7009
WASH8P	-0.549733	3.12578	-6.3159	7.19e-10	2.07e-07	11.6589
DLGAP5	0.603028	2.83904	6.30306	7.76e-10	2.22e-07	11.5854
ADIPOR2	0.369191	3.86711	6.30171	7.82e-10	2.22e-07	11.5777
WASHC5	0.408814	3.52603	6.29663	8.06e-10	2.28e-07	11.5487
KLK8	0.887278	0.717839	6.29527	8.12e-10	2.28e-07	11.5409
GTF2IP20	-0.457001	1.88349	-6.29266	8.25e-10	2.31e-07	11.526
MMS22L	0.224298	0.757833	6.28813	8.47e-10	2.36e-07	11.5001
NXF1	-0.273555	3.95669	-6.28555	8.6e-10	2.38e-07	11.4854
SRP14	-0.293608	6.69072	-6.28268	8.74e-10	2.41e-07	11.4691
RABEP2	-0.426783	3.46637	-6.28178	8.79e-10	2.41e-07	11.4639
CSAD	-0.529582	2.32272	-6.28031	8.86e-10	2.41e-07	11.4555
ANXA2	0.680284	6.56406	6.28	8.88e-10	2.41e-07	11.4538
NDUFC1	-0.352291	4.4496	-6.27843	8.96e-10	2.42e-07	11.4448
COLQ	-0.287747	0.610312	-6.27718	9.03e-10	2.42e-07	11.4377
DIP2B	0.405579	2.451	6.27185	9.31e-10	2.49e-07	11.4073
AC244090.1	-0.563571	3.05241	-6.26925	9.46e-10	2.51e-07	11.3925
MYO5A	0.45921	1.6196	6.2656	9.66e-10	2.55e-07	11.3717
TMEM51	-0.579717	4.57775	-6.26331	9.79e-10	2.58e-07	11.3587
DCBLD1	0.478869	2.04988	6.26095	9.93e-10	2.6e-07	11.3453
REX1BD	-0.459152	3.48241	-6.25531	1.03e-09	2.67e-07	11.3133
PSMD1	0.313604	4.3574	6.25446	1.03e-09	2.67e-07	11.3084
MYO1B	0.716111	2.98184	6.25301	1.04e-09	2.68e-07	11.3002
FANCM	0.20912	0.842102	6.24788	1.07e-09	2.75e-07	11.2711
ZNF785	-0.337765	1.70777	-6.24652	1.08e-09	2.76e-07	11.2634
NUP160	0.363715	2.69736	6.23674	1.14e-09	2.91e-07	11.2079
SH2B1	-0.404295	3.32502	-6.23273	1.17e-09	2.96e-07	11.1851
KCTD9	0.406293	2.45349	6.2295	1.19e-09	2.99e-07	11.1669
ZNF428	-0.445369	4.13753	-6.2293	1.19e-09	2.99e-07	11.1657
SERF2	-0.40201	6.06293	-6.2261	1.22e-09	3.03e-07	11.1476
DMAP1	-0.341663	3.13256	-6.22474	1.23e-09	3.03e-07	11.1399
AC099518.4	-0.180235	0.385881	-6.2246	1.23e-09	3.03e-07	11.1391
ANKS3	-0.307002	1.75474	-6.22332	1.24e-09	3.04e-07	11.1319
PRKDC	0.526536	3.87696	6.22164	1.25e-09	3.04e-07	11.1224
FLOT2	-0.437631	6.17422	-6.22162	1.25e-09	3.04e-07	11.1223
ADAMTSL4	0.845252	1.98821	6.21798	1.27e-09	3.09e-07	11.1017
AMD1	0.366635	3.26626	6.21718	1.28e-09	3.09e-07	11.0972
KLC4	-0.316912	2.35973	-6.20612	1.37e-09	3.29e-07	11.0347
OGDH	0.32761	4.71053	6.20455	1.38e-09	3.3e-07	11.0258
C6orf120	0.337194	3.0319	6.20347	1.39e-09	3.31e-07	11.0197
PUS7	0.374463	2.58318	6.19949	1.42e-09	3.37e-07	10.9973
AC010326.4	-0.453133	2.4066	-6.19685	1.44e-09	3.41e-07	10.9824
RAB11B	-0.32986	5.68034	-6.19573	1.45e-09	3.41e-07	10.9761
YWHAQ	0.464119	6.66198	6.19379	1.47e-09	3.44e-07	10.9651
IQGAP1	0.408461	4.46694	6.18359	1.56e-09	3.62e-07	10.9077
AC009120.2	-0.355409	1.0982	-6.18346	1.56e-09	3.62e-07	10.907
GTF2IRD2B	-0.213033	0.699651	-6.18059	1.58e-09	3.66e-07	10.8908
LINC02577	0.44037	0.513727	6.17946	1.59e-09	3.67e-07	10.8845
ZC3HAV1L	0.440317	1.46774	6.17516	1.63e-09	3.74e-07	10.8603
CEP128	0.202365	0.727731	6.17303	1.65e-09	3.77e-07	10.8483
DSP	1.14085	4.93056	6.17	1.68e-09	3.82e-07	10.8313
KIAA0895	0.358576	0.894617	6.16961	1.69e-09	3.82e-07	10.8291
ANAPC1	0.233692	1.2574	6.16337	1.75e-09	3.94e-07	10.7941
GOPC	0.316819	3.11324	6.16253	1.76e-09	3.94e-07	10.7893
CYTH3	0.448099	2.39745	6.15662	1.82e-09	4.06e-07	10.7562
AC010326.3	-0.439202	2.74094	-6.14687	1.92e-09	4.27e-07	10.7015
MAPKAPK5-AS1	-0.350184	3.24991	-6.14654	1.93e-09	4.27e-07	10.6997
CORO1C	0.535765	4.04777	6.14426	1.95e-09	4.29e-07	10.6869
ELOVL4	0.543992	0.932895	6.14389	1.96e-09	4.29e-07	10.6849
EIF2S1	0.354442	3.81912	6.14288	1.97e-09	4.29e-07	10.6792
AC120053.1	-0.39565	1.85357	-6.14261	1.97e-09	4.29e-07	10.6777
TMOD3	0.390965	3.22895	6.14217	1.98e-09	4.29e-07	10.6752
ERC1	0.387569	2.11884	6.14075	1.99e-09	4.31e-07	10.6673
BZW1	0.349017	3.75592	6.14003	2e-09	4.31e-07	10.6632
ZNF763	-0.274933	0.790983	-6.1365	2.04e-09	4.38e-07	10.6435
FITM1	-0.163964	0.38448	-6.13545	2.05e-09	4.39e-07	10.6376
NLN	0.370273	1.75327	6.13194	2.1e-09	4.46e-07	10.618
ZBTB18	-0.534815	2.3355	-6.12856	2.14e-09	4.51e-07	10.5991
TAF4B	0.367603	1.02538	6.12822	2.14e-09	4.51e-07	10.5972
IARS	0.415054	3.90247	6.12789	2.14e-09	4.51e-07	10.5954
WDR45	-0.314486	3.51827	-6.12627	2.16e-09	4.53e-07	10.5863
RBMS2P1	0.0902846	0.188911	6.1254	2.18e-09	4.54e-07	10.5815
SCRN1	0.666173	3.33133	6.12262	2.21e-09	4.59e-07	10.5659
CARNMT1	0.318855	2.27192	6.11505	2.31e-09	4.78e-07	10.5237
WDHD1	0.409517	1.91135	6.11289	2.34e-09	4.82e-07	10.5117
WWC2	0.329716	1.12924	6.10162	2.49e-09	5.12e-07	10.4489
PCDHGC3	0.510885	1.39802	6.09524	2.59e-09	5.29e-07	10.4134
LYRM9	-0.272224	0.899791	-6.08533	2.74e-09	5.58e-07	10.3583
AL450384.2	-0.576441	1.2835	-6.0789	2.84e-09	5.76e-07	10.3226
B3GALNT2	0.325148	1.24575	6.07455	2.91e-09	5.89e-07	10.2985
INO80E	-0.33377	3.21928	-6.06289	3.11e-09	6.27e-07	10.2338
GOLT1B	0.343034	3.71819	6.06202	3.12e-09	6.27e-07	10.229
SCOC-AS1	-0.232087	0.576916	-6.0601	3.16e-09	6.32e-07	10.2184
ASB16-AS1	-0.328754	2.44933	-6.05678	3.22e-09	6.42e-07	10.2001
GSDMB	-0.731181	2.89813	-6.04825	3.38e-09	6.7e-07	10.1529
OCEL1	-0.447254	3.45981	-6.04749	3.39e-09	6.7e-07	10.1487
MCF2L	-0.456195	1.2207	-6.04653	3.41e-09	6.7e-07	10.1434
SS18L2	-0.346903	4.17628	-6.04652	3.41e-09	6.7e-07	10.1433
KANK4	0.456387	0.402312	6.04513	3.44e-09	6.73e-07	10.1356
ITGA2	0.801337	2.91103	6.04287	3.48e-09	6.79e-07	10.1231
SLC35F2	0.532484	2.77705	6.04002	3.54e-09	6.88e-07	10.1074
ALDH1L2	0.423429	0.771729	6.03526	3.64e-09	7.04e-07	10.0812
AC005912.1	-0.700923	4.76756	-6.0338	3.67e-09	7.07e-07	10.0731
NRBF2	0.311851	3.51629	6.02889	3.77e-09	7.23e-07	10.046
PTOV1-AS2	-0.438038	2.21945	-6.02814	3.79e-09	7.23e-07	10.0419
C3orf62	-0.320709	1.94929	-6.02797	3.79e-09	7.23e-07	10.0409
ZNF513	-0.386819	3.63787	-6.0254	3.85e-09	7.29e-07	10.0268
FAM32A	-0.248947	5.53011	-6.02539	3.85e-09	7.29e-07	10.0268
ASXL2	0.307561	1.88917	6.02423	3.87e-09	7.31e-07	10.0203
UGGT1	0.346151	3.08412	6.01626	4.05e-09	7.62e-07	9.97645
BCL9L	0.489065	2.39751	6.01572	4.06e-09	7.62e-07	9.97353
SETMAR	-0.404852	2.58938	-6.01356	4.11e-09	7.65e-07	9.96164
SGMS2	0.469868	1.67277	6.01239	4.14e-09	7.65e-07	9.95522
AC008759.2	-0.431628	0.632624	-6.01239	4.14e-09	7.65e-07	9.95521
LUC7L	-0.441339	3.00578	-6.01188	4.15e-09	7.65e-07	9.95238
YKT6	0.351893	5.05979	6.01183	4.15e-09	7.65e-07	9.95211
FKBP9P1	0.340806	0.561667	6.01119	4.17e-09	7.65e-07	9.94857
LAMP2	0.524691	4.61868	6.01019	4.19e-09	7.67e-07	9.94312
FKBP14	0.349458	2.27908	6.00952	4.21e-09	7.67e-07	9.93939
IZUMO4	-0.354687	1.01453	-6.00642	4.28e-09	7.78e-07	9.92238
UBE2J2	-0.254471	3.78976	-6.00296	4.37e-09	7.91e-07	9.90336
ITPR2	0.407554	1.46462	6.00149	4.4e-09	7.94e-07	9.8953
SLC35F5	0.32614	2.57775	6.00099	4.42e-09	7.94e-07	9.89253
AC011462.5	-0.377631	1.09462	-5.99958	4.45e-09	7.98e-07	9.88482
CDC27	0.307321	3.32226	5.99183	4.65e-09	8.31e-07	9.84228
KIF23	0.494345	2.54133	5.99077	4.68e-09	8.33e-07	9.8365
TMEM51-AS1	-0.463941	0.99495	-5.98033	4.96e-09	8.78e-07	9.77928
CKAP5	0.399826	3.8598	5.97987	4.98e-09	8.78e-07	9.77678
LRRC27	-0.190012	0.819079	-5.97968	4.98e-09	8.78e-07	9.77572
NAMPT	0.621775	3.77067	5.9769	5.06e-09	8.89e-07	9.76054
CDK5RAP3	-0.394801	4.51841	-5.97528	5.11e-09	8.92e-07	9.75166
TNPO1	0.346454	3.14969	5.97521	5.11e-09	8.92e-07	9.75124
MANCR	0.470106	0.437055	5.97207	5.2e-09	9.04e-07	9.73412
GPS2	-0.308969	1.27922	-5.9694	5.28e-09	9.15e-07	9.71949
DSG2	0.72555	4.63064	5.96714	5.35e-09	9.2e-07	9.70716
RASSF8	0.450521	1.44003	5.96671	5.36e-09	9.2e-07	9.70478
NSUN5P1	-0.418936	2.06478	-5.96645	5.37e-09	9.2e-07	9.70338
CYP4F8	-1.21342	1.51225	-5.96615	5.37e-09	9.2e-07	9.70175
LIPE	-0.52205	1.73852	-5.96466	5.42e-09	9.25e-07	9.69359
AF131215.6	-0.4374	0.942969	-5.96125	5.52e-09	9.4e-07	9.67499
SCAND1	-0.471832	5.04036	-5.95993	5.57e-09	9.44e-07	9.66775
DSG3	1.47682	1.76846	5.95829	5.62e-09	9.49e-07	9.65884
KCNQ1	-0.782287	2.39082	-5.95658	5.67e-09	9.56e-07	9.64947
TTLL3	-0.482964	1.57611	-5.95353	5.77e-09	9.65e-07	9.63287
PURB	0.272231	3.28031	5.95317	5.78e-09	9.65e-07	9.63087
AC078880.3	-0.548575	0.510726	-5.95315	5.78e-09	9.65e-07	9.63076
PANX1	0.463005	3.13386	5.94926	5.91e-09	9.83e-07	9.60956
PPP2R3A	0.411514	1.54557	5.94703	5.98e-09	9.93e-07	9.59741
BBOX1	0.431327	0.521361	5.94546	6.04e-09	9.93e-07	9.58888
KPNA2	0.56668	5.62263	5.94504	6.05e-09	9.93e-07	9.5866
SLC30A4	0.295945	0.792681	5.94491	6.06e-09	9.93e-07	9.58587
COX5B	-0.412046	6.38382	-5.94477	6.06e-09	9.93e-07	9.58512
FKBP9	0.472445	4.20995	5.94346	6.11e-09	9.97e-07	9.57797
ING4	-0.37006	3.58817	-5.94194	6.16e-09	1e-06	9.5697
CROCC	-0.336267	2.36057	-5.94143	6.17e-09	1e-06	9.56692
TMA7	-0.423149	6.54357	-5.93856	6.28e-09	1.02e-06	9.55128
ATXN7L2	-0.337158	1.42993	-5.93753	6.31e-09	1.02e-06	9.54569
MAP3K20	0.501072	1.98874	5.93653	6.35e-09	1.02e-06	9.54025
TMED10	0.298385	5.78025	5.93202	6.51e-09	1.04e-06	9.51573
AC006329.1	0.704872	1.23015	5.93179	6.52e-09	1.04e-06	9.51448
NR2F6	-0.475167	5.07662	-5.9275	6.68e-09	1.06e-06	9.49113
SNHG11	-0.333432	2.41973	-5.9247	6.78e-09	1.08e-06	9.47592
ZSCAN9	-0.375137	2.29614	-5.92056	6.94e-09	1.1e-06	9.45346
PATZ1	-0.517373	3.40208	-5.91574	7.13e-09	1.13e-06	9.4273
CTSV	0.81208	1.6489	5.91363	7.21e-09	1.14e-06	9.41584
KLK5	1.23277	0.962081	5.91246	7.26e-09	1.14e-06	9.40952
PSEN1	0.226723	3.1705	5.90578	7.54e-09	1.18e-06	9.37328
PCP2	-0.558019	1.1945	-5.90458	7.59e-09	1.18e-06	9.36682
CHST11	0.748078	2.33242	5.90367	7.63e-09	1.19e-06	9.3619
TRIM8	-0.404284	5.35779	-5.90176	7.71e-09	1.2e-06	9.35155
ZNF444	-0.329776	2.59158	-5.90147	7.72e-09	1.2e-06	9.34996
CLIC4	0.751319	4.50399	5.89908	7.82e-09	1.21e-06	9.337
MIB1	0.382483	2.60696	5.89873	7.84e-09	1.21e-06	9.33513
STK3	0.299938	1.78897	5.89743	7.9e-09	1.21e-06	9.3281
SNHG26	0.343193	0.683593	5.89023	8.22e-09	1.26e-06	9.28918
AL355353.1	-0.672822	2.28055	-5.88751	8.34e-09	1.27e-06	9.27443
ZBTB7C	-0.805934	2.30807	-5.88293	8.56e-09	1.3e-06	9.24973
RAB11B-AS1	-0.394714	2.04654	-5.88282	8.56e-09	1.3e-06	9.24911
MRPL20-AS1	-0.293156	3.2973	-5.87967	8.72e-09	1.32e-06	9.23211
ZNF524	-0.407191	3.98709	-5.87942	8.73e-09	1.32e-06	9.23076
SAMD10	-0.562867	2.86904	-5.87889	8.75e-09	1.32e-06	9.22793
HEXD	-0.444911	2.91445	-5.87843	8.78e-09	1.32e-06	9.22541
ST6GALNAC4P1	-0.198149	0.497083	-5.87542	8.92e-09	1.33e-06	9.20919
IRF2BP1	-0.320736	3.76695	-5.87541	8.92e-09	1.33e-06	9.20915
ATP5MC2	-0.31719	6.03692	-5.87449	8.97e-09	1.33e-06	9.20416
KBTBD2	0.251173	3.47863	5.86909	9.24e-09	1.37e-06	9.17504
CHMP2A	-0.38607	5.91275	-5.85975	9.73e-09	1.44e-06	9.12474
RRM2	0.653796	4.02748	5.85832	9.81e-09	1.45e-06	9.11704
CLIP1	0.370617	2.7353	5.85787	9.84e-09	1.45e-06	9.11464
CCDC159	-0.387233	1.97655	-5.85696	9.89e-09	1.45e-06	9.10976
CC2D1A	-0.316703	4.00633	-5.85515	9.99e-09	1.46e-06	9.10004
C20orf96	-0.509519	2.77413	-5.8551	9.99e-09	1.46e-06	9.09977
CYTH2	-0.327141	3.60516	-5.85299	1.01e-08	1.47e-06	9.08841
STK17A	0.528029	2.88588	5.85141	1.02e-08	1.48e-06	9.0799
TP53I13	-0.442204	3.60564	-5.84635	1.05e-08	1.52e-06	9.05272
UBE3C	0.327831	3.49003	5.84252	1.07e-08	1.55e-06	9.03214
AMY2B	-0.311693	0.529815	-5.84157	1.08e-08	1.55e-06	9.02703
CRYBG3	0.412463	1.08633	5.83924	1.09e-08	1.57e-06	9.01453
IL1RAP	0.534987	1.43069	5.83575	1.11e-08	1.59e-06	8.99581
ASPM	0.486961	1.83429	5.83404	1.12e-08	1.6e-06	8.98666
MTFR1L	-0.285673	3.03983	-5.83129	1.14e-08	1.62e-06	8.9719
AGFG1	0.384518	2.88586	5.83115	1.14e-08	1.62e-06	8.97114
PVR	0.489602	3.77717	5.83059	1.14e-08	1.62e-06	8.96814
CHST15	0.670423	1.82959	5.82635	1.17e-08	1.65e-06	8.94545
NR3C1	0.536337	1.9855	5.82378	1.19e-08	1.67e-06	8.93169
LSM7	-0.397546	5.15733	-5.8202	1.21e-08	1.7e-06	8.91254
USE1	-0.314138	3.3083	-5.82014	1.21e-08	1.7e-06	8.91218
KLF15	-0.542762	1.14273	-5.81937	1.22e-08	1.7e-06	8.90807
AC104825.1	-0.503373	1.51328	-5.81869	1.22e-08	1.7e-06	8.90444
AC084018.1	-0.507085	1.61381	-5.81674	1.23e-08	1.72e-06	8.894
RGS20	0.495073	0.828435	5.81058	1.28e-08	1.77e-06	8.8611
OSER1-DT	-0.512884	2.40803	-5.80801	1.3e-08	1.79e-06	8.84735
PEX3	0.332066	2.80655	5.80614	1.31e-08	1.81e-06	8.83735
TMEM241	0.353676	1.48507	5.80527	1.32e-08	1.81e-06	8.83273
AC010331.1	-0.322447	0.885777	-5.80444	1.32e-08	1.81e-06	8.82829
MPND	-0.408128	3.81038	-5.80373	1.33e-08	1.82e-06	8.82448
CRYGS	-0.320612	0.980436	-5.79925	1.36e-08	1.86e-06	8.80057
NDUFB7	-0.36951	7.19485	-5.7987	1.36e-08	1.86e-06	8.79763
DEPDC1	0.464639	1.82401	5.79645	1.38e-08	1.88e-06	8.78562
WASH2P	-0.289271	1.2591	-5.79546	1.39e-08	1.88e-06	8.78035
PRR11	0.53616	2.79103	5.79447	1.4e-08	1.89e-06	8.77509
MYZAP	-0.593995	1.80344	-5.79166	1.42e-08	1.91e-06	8.76009
PMF1	-0.3083	3.8017	-5.78851	1.44e-08	1.94e-06	8.74334
RCOR1	0.392416	3.0277	5.78786	1.45e-08	1.94e-06	8.73985
TMEM134	-0.415447	3.38283	-5.78627	1.46e-08	1.95e-06	8.7314
MIR429	-0.910207	2.16482	-5.78527	1.47e-08	1.96e-06	8.72605
CAPN5	-0.898568	3.11062	-5.77874	1.52e-08	2.03e-06	8.69131
IP6K2	-0.394112	4.04989	-5.77719	1.53e-08	2.04e-06	8.68308
RAB11FIP5	0.357551	2.72091	5.77523	1.55e-08	2.06e-06	8.67265
LATS2	0.400209	2.06997	5.77328	1.57e-08	2.07e-06	8.66231
TBX3	-1.13518	4.03134	-5.77209	1.58e-08	2.08e-06	8.65595
AC106782.6	-0.316	1.13404	-5.77156	1.58e-08	2.08e-06	8.65317
HACD2	0.440024	3.74107	5.76763	1.62e-08	2.12e-06	8.63225
CCNL2	-0.529509	4.57472	-5.76611	1.63e-08	2.13e-06	8.62421
TMEM45A	1.03488	2.49163	5.76563	1.63e-08	2.13e-06	8.62163
ZNF224	-0.290546	1.35511	-5.76548	1.64e-08	2.13e-06	8.62083
H1FX-AS1	-0.303232	0.913472	-5.76388	1.65e-08	2.14e-06	8.61236
LIPT1	-0.219507	1.53573	-5.76318	1.66e-08	2.15e-06	8.60866
ITGB1	0.593684	5.28713	5.75987	1.69e-08	2.18e-06	8.5911
IPO8P1	0.0184866	0.0259238	5.75913	1.69e-08	2.18e-06	8.58717
ANKRD10	-0.424701	4.24758	-5.75906	1.69e-08	2.18e-06	8.58677
AC125807.2	0.303252	0.638082	5.75802	1.7e-08	2.19e-06	8.58129
ACBD4	-0.424358	2.1704	-5.7566	1.72e-08	2.2e-06	8.57374
NUMB	0.244467	2.6852	5.7549	1.73e-08	2.21e-06	8.56472
COA5	-0.287946	3.34251	-5.75362	1.75e-08	2.23e-06	8.55798
POMK	0.376619	0.817867	5.74714	1.81e-08	2.3e-06	8.52362
AC040162.1	-0.216882	0.712999	-5.74662	1.81e-08	2.3e-06	8.52089
RALA	0.320481	4.27789	5.74538	1.83e-08	2.31e-06	8.51429
SLC2A12	0.383104	0.549531	5.74535	1.83e-08	2.31e-06	8.51417
G2E3	0.264195	1.54013	5.74489	1.83e-08	2.31e-06	8.51174
GARS	0.357972	5.06056	5.74378	1.84e-08	2.31e-06	8.50584
AP001412.1	-0.157916	0.394197	-5.7431	1.85e-08	2.32e-06	8.50224
PACRG	-0.373856	0.505649	-5.74159	1.86e-08	2.33e-06	8.49424
USP37	0.248075	0.664726	5.74061	1.87e-08	2.33e-06	8.48909
SELENOI	0.363389	2.94883	5.74053	1.87e-08	2.33e-06	8.48863
GAPVD1	0.259184	2.10192	5.73998	1.88e-08	2.33e-06	8.48571
BACH1	0.440393	2.67368	5.73957	1.88e-08	2.33e-06	8.48355
ZNF226	-0.266937	1.80441	-5.73927	1.89e-08	2.33e-06	8.48196
CIAO3	-0.264573	2.34916	-5.73862	1.89e-08	2.34e-06	8.47856
RPARP-AS1	-0.327619	1.53218	-5.7336	1.95e-08	2.39e-06	8.45202
RBM6	-0.390569	3.66424	-5.73341	1.95e-08	2.39e-06	8.45101
DEGS1	0.663793	4.14804	5.73143	1.97e-08	2.41e-06	8.44054
AC009065.4	-0.309255	1.11549	-5.72998	1.99e-08	2.42e-06	8.43287
PLA2G6	-0.436227	1.67167	-5.72964	1.99e-08	2.42e-06	8.43107
KDELR3	0.70378	3.52458	5.72943	1.99e-08	2.42e-06	8.43
ABL2	0.309557	1.74093	5.72787	2.01e-08	2.44e-06	8.42177
RASAL2-AS1	0.185325	0.488824	5.72735	2.01e-08	2.44e-06	8.41899
METTL8	0.257418	1.50524	5.72632	2.03e-08	2.45e-06	8.41357
EREG	0.902358	1.13017	5.72352	2.06e-08	2.47e-06	8.39877
AC090425.1	-0.300286	1.11644	-5.72336	2.06e-08	2.47e-06	8.39796
DNAJC17	-0.242159	2.04135	-5.72319	2.06e-08	2.47e-06	8.39702
C6orf136	-0.336219	3.53742	-5.72268	2.07e-08	2.47e-06	8.39434
AC010542.5	-0.393425	1.74856	-5.72072	2.09e-08	2.5e-06	8.384
ME1	0.681495	2.35705	5.71932	2.1e-08	2.51e-06	8.37664
PPP1R32	-0.261906	0.779511	-5.71807	2.12e-08	2.52e-06	8.37003
SELENOO	-0.322656	3.91394	-5.71192	2.19e-08	2.6e-06	8.33764
IMPDH1	0.527602	4.27887	5.70521	2.27e-08	2.69e-06	8.30231
KRT14	2.17296	4.1711	5.70487	2.28e-08	2.69e-06	8.30051
NUP188	0.353365	3.33887	5.70289	2.3e-08	2.71e-06	8.29011
ADCY3	0.406594	2.57826	5.70287	2.3e-08	2.71e-06	8.29
C19orf18	-0.428912	0.972408	-5.69982	2.34e-08	2.75e-06	8.27397
NAB1	0.4484	3.23237	5.69837	2.36e-08	2.76e-06	8.26632
LDLR	0.686618	2.98158	5.69665	2.38e-08	2.78e-06	8.25728
PAFAH1B3	-0.53813	5.47789	-5.69596	2.39e-08	2.79e-06	8.25369
RTTN	0.301711	1.17467	5.69462	2.41e-08	2.8e-06	8.24665
AC003665.1	-0.374815	1.90534	-5.69429	2.41e-08	2.8e-06	8.24491
PTHLH	1.1299	1.98894	5.69111	2.45e-08	2.84e-06	8.22818
BICRA	-0.253288	2.07441	-5.68487	2.54e-08	2.93e-06	8.19545
AMZ1	0.209992	0.205647	5.68413	2.55e-08	2.94e-06	8.19159
TRIR	-0.317699	6.50001	-5.6829	2.56e-08	2.95e-06	8.18511
BARX2	0.856896	1.43517	5.68231	2.57e-08	2.95e-06	8.182
CPA4	0.831071	1.08655	5.67752	2.64e-08	3.03e-06	8.1569
DPM3	-0.521947	5.55123	-5.67583	2.66e-08	3.05e-06	8.14809
AC006077.2	-0.350896	1.05249	-5.67363	2.7e-08	3.08e-06	8.13653
SACS	0.385003	0.856454	5.67262	2.71e-08	3.09e-06	8.13123
ZFPM1	-0.261067	1.34871	-5.67004	2.75e-08	3.12e-06	8.11772
WWC3	0.444583	2.85112	5.6677	2.78e-08	3.16e-06	8.10548
NAA60	-0.256385	2.73973	-5.66609	2.81e-08	3.18e-06	8.0971
P4HA2	0.442391	2.75039	5.66422	2.84e-08	3.2e-06	8.08727
SHCBP1	0.451839	2.18925	5.66017	2.9e-08	3.27e-06	8.06613
AC093616.1	0.152573	0.266575	5.65777	2.94e-08	3.3e-06	8.0536
PTP4A1	0.529563	4.21189	5.65451	2.99e-08	3.35e-06	8.03654
COX6B1	-0.371077	7.87276	-5.65388	3e-08	3.36e-06	8.03325
YAP1	0.482277	4.13903	5.65319	3.01e-08	3.36e-06	8.02966
SRXN1	0.347608	0.822902	5.649	3.08e-08	3.43e-06	8.0078
RDX	0.594318	3.43616	5.64805	3.09e-08	3.44e-06	8.00284
KRTAP5-10	-0.378844	0.462152	-5.64639	3.12e-08	3.47e-06	7.99418
REEP3	0.372056	3.59646	5.64279	3.18e-08	3.53e-06	7.9754
CKAP2L	0.474061	2.02535	5.64212	3.19e-08	3.53e-06	7.9719
ARID3A	0.658625	1.77487	5.63943	3.24e-08	3.58e-06	7.9579
PAPPA	0.298611	0.389366	5.63854	3.26e-08	3.59e-06	7.95325
ARSJ	0.453963	0.777751	5.63536	3.31e-08	3.64e-06	7.93671
GPN2	-0.202007	3.02935	-5.62947	3.42e-08	3.75e-06	7.90606
ZRSR2	-0.291114	2.94611	-5.62896	3.43e-08	3.75e-06	7.9034
HSPA4L	0.437069	0.976394	5.62078	3.58e-08	3.91e-06	7.86086
ZNF48	-0.354838	2.29853	-5.61889	3.62e-08	3.94e-06	7.85102
AC078880.5	-0.274713	0.277026	-5.61875	3.62e-08	3.94e-06	7.8503
PDLIM5	0.385624	3.03209	5.61787	3.64e-08	3.95e-06	7.84573
KLHDC7A	-0.963775	2.10922	-5.61219	3.75e-08	4.06e-06	7.81629
AC016957.2	-0.254022	0.737954	-5.6103	3.79e-08	4.1e-06	7.80644
MRPL34	-0.311728	4.55692	-5.60849	3.83e-08	4.13e-06	7.79706
INAFM1	-0.397177	3.63727	-5.60725	3.85e-08	4.15e-06	7.79063
ZNF837	-0.305525	1.2878	-5.60633	3.87e-08	4.16e-06	7.78588
MICAL3	0.214811	0.73474	5.60512	3.9e-08	4.18e-06	7.77959
GASAL1	0.321069	0.651595	5.60326	3.94e-08	4.21e-06	7.76997
PLEKHH3	-0.451586	3.56989	-5.60292	3.94e-08	4.21e-06	7.76819
NIN	0.294771	2.07373	5.60076	3.99e-08	4.25e-06	7.75699
SNHG16	0.300668	2.44136	5.60026	4e-08	4.25e-06	7.75444
OSBPL8	0.366946	2.58556	5.5988	4.03e-08	4.28e-06	7.74684
FER	0.237864	1.02343	5.59677	4.07e-08	4.32e-06	7.73634
EIF3A	0.380749	4.88324	5.5961	4.09e-08	4.32e-06	7.73289
EFNB2	0.637073	3.5112	5.5957	4.1e-08	4.32e-06	7.7308
CYP51A1	0.280054	0.940129	5.59387	4.14e-08	4.35e-06	7.72136
SGSM3	-0.339338	4.11867	-5.59366	4.14e-08	4.35e-06	7.72023
CHM	0.256015	1.5264	5.593	4.16e-08	4.35e-06	7.71685
PARD6A	-0.536596	2.17472	-5.59294	4.16e-08	4.35e-06	7.7165
FMNL2	0.548297	2.27907	5.59149	4.19e-08	4.37e-06	7.70902
MET	0.587765	3.50891	5.59135	4.19e-08	4.37e-06	7.70828
KIAA1211L	-0.502601	1.69896	-5.59006	4.22e-08	4.39e-06	7.70161
AC034236.2	-0.2544	0.979642	-5.58975	4.23e-08	4.39e-06	7.70005
ZNF222	-0.343703	1.48716	-5.58943	4.24e-08	4.39e-06	7.69836
PBXIP1	-0.434024	5.2776	-5.58557	4.33e-08	4.48e-06	7.67842
WASH7P	-0.271295	1.0485	-5.58318	4.38e-08	4.52e-06	7.66607
NDUFB1	-0.329922	4.26613	-5.58289	4.39e-08	4.52e-06	7.66456
TCP11L1	0.356845	1.33651	5.58118	4.43e-08	4.56e-06	7.65576
KLF10	0.541441	3.82725	5.57996	4.46e-08	4.58e-06	7.64943
SPPL2B	-0.35632	3.09379	-5.57926	4.47e-08	4.58e-06	7.64581
MGMT	-0.488384	3.27495	-5.57924	4.47e-08	4.58e-06	7.64571
UQCRQ	-0.401404	6.37245	-5.57836	4.49e-08	4.59e-06	7.64119
ZBED6	0.384067	0.701887	5.57723	4.52e-08	4.61e-06	7.63533
ARHGAP21	0.397584	2.59813	5.57664	4.54e-08	4.61e-06	7.63229
DNAJC19	-0.259439	3.07243	-5.57523	4.57e-08	4.64e-06	7.62502
SEMA3A	0.387233	0.704637	5.57058	4.68e-08	4.75e-06	7.60107
EVA1A	0.612573	1.14067	5.57011	4.7e-08	4.75e-06	7.59864
CCL17	-0.636971	1.53936	-5.56992	4.7e-08	4.75e-06	7.59763
AL451165.2	-0.369593	2.14518	-5.56718	4.77e-08	4.81e-06	7.58352
NARF	-0.363421	3.3649	-5.56646	4.79e-08	4.82e-06	7.57982
FBXO44	-0.359856	2.69973	-5.56091	4.93e-08	4.94e-06	7.55123
SGPP1	0.567506	2.54827	5.56087	4.93e-08	4.94e-06	7.55102
LINC02454	0.230218	0.250572	5.55977	4.96e-08	4.96e-06	7.54536
PICK1	-0.351725	3.13322	-5.55725	5.03e-08	5.02e-06	7.53239
SLC25A15	0.332209	1.80873	5.55543	5.08e-08	5.06e-06	7.52301
EIF4H	0.284247	6.01908	5.55443	5.1e-08	5.08e-06	7.5179
RAP2C	0.302671	3.20005	5.55411	5.11e-08	5.08e-06	7.51626
RPS19BP1	-0.336424	4.26718	-5.5537	5.12e-08	5.08e-06	7.51411
ABHD17A	-0.264976	2.83514	-5.55092	5.2e-08	5.14e-06	7.49984
FGFBP1	1.47171	2.58871	5.55014	5.22e-08	5.16e-06	7.49584
HIPK3	0.366945	3.03105	5.54863	5.26e-08	5.19e-06	7.48808
MYC	0.832971	4.55939	5.54729	5.3e-08	5.2e-06	7.4812
STRAP	0.338206	5.63649	5.5471	5.31e-08	5.2e-06	7.48022
AC005387.1	-0.260788	0.758843	-5.54702	5.31e-08	5.2e-06	7.47979
Z84492.1	-0.35428	1.05173	-5.54615	5.33e-08	5.22e-06	7.47531
PRKRIP1	-0.269632	3.49367	-5.5449	5.37e-08	5.24e-06	7.46892
ZNF205	-0.318793	3.07253	-5.54389	5.4e-08	5.26e-06	7.46373
STK11	-0.273027	3.29683	-5.54378	5.4e-08	5.26e-06	7.46316
C17orf82	-0.409755	1.06773	-5.54293	5.43e-08	5.27e-06	7.4588
NID1	0.64723	3.58197	5.54068	5.49e-08	5.32e-06	7.44725
KRT6A	2.27612	4.40029	5.53499	5.66e-08	5.48e-06	7.41804
SH3GLB2	-0.518415	4.59748	-5.53259	5.73e-08	5.54e-06	7.40574
THSD4	0.352738	1.08564	5.53045	5.8e-08	5.59e-06	7.3948
PLIN5	-0.642794	1.31629	-5.52793	5.87e-08	5.65e-06	7.38186
PEX14	-0.241222	3.66329	-5.52782	5.88e-08	5.65e-06	7.38129
HDAC10	-0.350009	1.88219	-5.52589	5.94e-08	5.69e-06	7.3714
CELSR1	0.635483	2.22689	5.5255	5.95e-08	5.7e-06	7.36941
ZNF10	-0.333071	1.28503	-5.52351	6.01e-08	5.75e-06	7.35924
HDLBP	0.304515	5.33598	5.52067	6.1e-08	5.82e-06	7.34472
MALL	0.618914	1.23301	5.51938	6.15e-08	5.85e-06	7.3381
STRN	0.299155	2.44842	5.51754	6.21e-08	5.9e-06	7.32867
SLC31A1	0.369428	3.34153	5.51712	6.22e-08	5.9e-06	7.32656
MGST2	-0.49847	4.40829	-5.5165	6.24e-08	5.91e-06	7.32339
AL109659.2	-0.10513	0.167156	-5.51384	6.33e-08	5.98e-06	7.30979
CXXC1	-0.414906	4.0719	-5.51361	6.34e-08	5.98e-06	7.3086
SIDT1	-0.479601	1.23468	-5.51313	6.35e-08	5.98e-06	7.30617
TNFAIP2	-0.870282	6.27388	-5.51173	6.4e-08	6.02e-06	7.29898
ZBTB49	-0.197082	1.44126	-5.50641	6.58e-08	6.18e-06	7.27183
RHOD	0.813199	4.45871	5.50416	6.66e-08	6.24e-06	7.26036
UBL5	-0.306384	6.09233	-5.50299	6.7e-08	6.27e-06	7.25438
CPSF2	0.246463	2.49448	5.50073	6.78e-08	6.32e-06	7.24284
AC008610.1	-0.387262	1.41214	-5.50045	6.79e-08	6.32e-06	7.24144
GULP1	0.272834	0.568289	5.50038	6.8e-08	6.32e-06	7.24104
PPP1R14C	0.971582	2.0602	5.49981	6.82e-08	6.33e-06	7.23817
HTR1D	0.41971	0.593334	5.49732	6.91e-08	6.4e-06	7.22544
GTF2IRD2	-0.145457	0.432938	-5.49606	6.95e-08	6.42e-06	7.21902
KIF14	0.396167	1.46976	5.49604	6.95e-08	6.42e-06	7.21892
EFR3A	0.35662	3.49345	5.4956	6.97e-08	6.43e-06	7.21667
PCNX1	0.292413	1.78155	5.49437	7.01e-08	6.46e-06	7.21041
JTB	-0.300798	6.75895	-5.49196	7.1e-08	6.53e-06	7.19815
TRIM27	-0.272686	3.40493	-5.48907	7.21e-08	6.62e-06	7.18343
CCDC85C	0.294776	1.29479	5.48819	7.25e-08	6.64e-06	7.17896
HSH2D	-0.595122	2.27469	-5.48791	7.26e-08	6.64e-06	7.1775
MYPOP	-0.266582	2.9163	-5.48603	7.33e-08	6.69e-06	7.16794
KPNA3	0.389284	3.34019	5.48542	7.35e-08	6.7e-06	7.16486
PTOV1	-0.301769	4.81528	-5.48188	7.49e-08	6.81e-06	7.14683
CRACR2B	-0.809802	2.78248	-5.47988	7.57e-08	6.88e-06	7.13667
AL356740.3	-0.401872	0.764783	-5.47924	7.59e-08	6.89e-06	7.13342
AC004148.2	-0.403611	1.51973	-5.47815	7.64e-08	6.91e-06	7.12788
AL121760.1	0.0960228	0.11447	5.47651	7.7e-08	6.96e-06	7.11956
CAMSAP2	0.315242	2.91737	5.47625	7.71e-08	6.96e-06	7.11824
RILP	-0.424587	2.51159	-5.47559	7.74e-08	6.97e-06	7.11487
CLIP4	0.453434	1.76676	5.47509	7.76e-08	6.98e-06	7.1123
RBMS1P1	0.142962	0.338315	5.47234	7.87e-08	7.07e-06	7.09836
TSNAXIP1	-0.194343	0.51276	-5.46989	7.98e-08	7.14e-06	7.08592
ZNF554	-0.223952	1.11321	-5.46978	7.98e-08	7.14e-06	7.08537
SCEL	0.772608	1.08881	5.46778	8.07e-08	7.2e-06	7.0752
GPAT3	0.422903	0.821652	5.4663	8.13e-08	7.25e-06	7.06768
C12orf57	-0.406464	5.01867	-5.46492	8.19e-08	7.29e-06	7.06069
INTS13	0.351538	3.23371	5.4641	8.22e-08	7.31e-06	7.05653
NADSYN1	-0.480892	3.00181	-5.46272	8.28e-08	7.35e-06	7.04956
HERC3	0.380123	1.83678	5.4624	8.3e-08	7.35e-06	7.04793
MBTPS2	0.259424	1.6454	5.46168	8.33e-08	7.36e-06	7.04426
KLHL5	0.485462	2.22606	5.46038	8.38e-08	7.39e-06	7.0377
TTLL4	0.250181	1.94532	5.46028	8.39e-08	7.39e-06	7.0372
GRIPAP1	-0.253343	3.44834	-5.45697	8.54e-08	7.51e-06	7.02041
ELMOD3	-0.23728	1.94273	-5.45609	8.58e-08	7.53e-06	7.01594
LMBR1L	-0.313073	2.94565	-5.45582	8.59e-08	7.53e-06	7.0146
ATL2	0.400614	3.58858	5.45321	8.71e-08	7.62e-06	7.00136
KDELC2	0.484787	3.10458	5.45212	8.76e-08	7.65e-06	6.99585
CROCCP2	-0.326015	2.42897	-5.45116	8.8e-08	7.68e-06	6.99097
RASA1	0.410491	2.84365	5.44803	8.94e-08	7.79e-06	6.97514
IPO11	0.24337	1.81607	5.44658	9.01e-08	7.84e-06	6.96782
ARCN1	0.276272	5.28287	5.44606	9.04e-08	7.84e-06	6.96517
TESC	-1.10697	2.33886	-5.44596	9.04e-08	7.84e-06	6.96467
XPO1	0.273086	4.11471	5.44341	9.16e-08	7.93e-06	6.95181
SAMD8	0.287138	2.25622	5.4419	9.24e-08	7.96e-06	6.94418
MYH10	0.468801	2.9579	5.44187	9.24e-08	7.96e-06	6.94399
MFSD14B	0.336076	4.57092	5.44174	9.24e-08	7.96e-06	6.94333
QTRT1	-0.363958	3.87285	-5.44157	9.25e-08	7.96e-06	6.94249
PPP2R5E	0.224542	2.6519	5.43982	9.34e-08	8.01e-06	6.93365
COX7C	-0.323208	6.68446	-5.4396	9.35e-08	8.01e-06	6.93252
DPY19L1	0.354653	2.51786	5.43786	9.43e-08	8.07e-06	6.92374
NCKAP1	0.334886	3.05752	5.43767	9.44e-08	8.07e-06	6.9228
LINC01588	0.162412	0.445226	5.43388	9.63e-08	8.21e-06	6.90364
AC093904.4	0.233673	0.324738	5.43383	9.63e-08	8.21e-06	6.90341
AC006128.1	-0.3877	1.2972	-5.43352	9.65e-08	8.21e-06	6.90183
RELL1	0.358793	1.27328	5.43208	9.72e-08	8.25e-06	6.89455
PTPN14	0.295798	1.57911	5.42799	9.93e-08	8.41e-06	6.87393
QSER1	0.345471	2.2499	5.42783	9.94e-08	8.41e-06	6.87314
SYF2	-0.218027	4.22079	-5.42469	1.01e-07	8.54e-06	6.85732
AGPAT5	0.348183	2.49807	5.4217	1.03e-07	8.66e-06	6.84224
AC084036.1	-0.407735	1.62316	-5.41986	1.04e-07	8.73e-06	6.83297
PRKAR2A	0.315519	3.0799	5.41947	1.04e-07	8.73e-06	6.831
NUDT16L1	-0.303131	3.60942	-5.41783	1.05e-07	8.79e-06	6.82273
KDELR2	0.298815	6.27414	5.41747	1.05e-07	8.8e-06	6.82094
AC010487.2	-0.570194	1.32452	-5.41569	1.06e-07	8.86e-06	6.81199
AC099791.2	-0.170258	0.31023	-5.41496	1.06e-07	8.88e-06	6.80832
MTHFD2	0.536166	3.69401	5.41271	1.08e-07	8.97e-06	6.79701
WASH4P	-0.197135	0.813094	-5.40949	1.09e-07	9.11e-06	6.78081
ZNF552	-0.563708	2.57902	-5.40823	1.1e-07	9.16e-06	6.77447
RPS11	-0.335692	9.86041	-5.40595	1.11e-07	9.25e-06	6.76302
LRPPRC	0.291339	3.98192	5.40476	1.12e-07	9.29e-06	6.75701
SLC25A42	-0.336407	1.81348	-5.4044	1.12e-07	9.29e-06	6.7552
AC068491.4	0.0990262	0.0954988	5.40414	1.12e-07	9.29e-06	6.75391
AL021707.8	-0.4209	1.57775	-5.40392	1.13e-07	9.29e-06	6.7528
OPN3	0.417378	1.44233	5.4036	1.13e-07	9.29e-06	6.75122
SEL1L	0.286606	3.25921	5.40345	1.13e-07	9.29e-06	6.75044
ZNF302	-0.366588	2.22901	-5.4025	1.13e-07	9.32e-06	6.74567
MIIP	-0.346513	3.90601	-5.40208	1.14e-07	9.32e-06	6.74354
NAT8B	-0.444354	0.7347	-5.4014	1.14e-07	9.34e-06	6.74015
MRPL55	-0.313564	4.48669	-5.39965	1.15e-07	9.41e-06	6.73138
SURF4	0.326071	6.17184	5.39824	1.16e-07	9.46e-06	6.7243
TSPYL2	-0.392082	2.5688	-5.39809	1.16e-07	9.46e-06	6.72355
OSMR	0.764702	2.67249	5.39737	1.16e-07	9.48e-06	6.71992
DUSP14	0.413117	3.03835	5.3964	1.17e-07	9.52e-06	6.71506
RIF1	0.265539	1.95105	5.39591	1.17e-07	9.52e-06	6.71258
NOP53	-0.403188	5.7925	-5.39579	1.17e-07	9.52e-06	6.71199
MIR193BHG	0.414381	1.211	5.3939	1.19e-07	9.6e-06	6.70251
FBXO46	-0.301048	3.37942	-5.39284	1.19e-07	9.63e-06	6.69718
YWHAZP4	0.375729	1.39596	5.39201	1.2e-07	9.65e-06	6.69303
UBALD1	-0.279368	3.03798	-5.39197	1.2e-07	9.65e-06	6.69285
HOXB5	-0.672143	1.8221	-5.39168	1.2e-07	9.65e-06	6.69136
CYP4Z2P	-0.456343	0.787616	-5.3903	1.21e-07	9.7e-06	6.68448
AKR7A2P1	0.0967015	0.0981856	5.38954	1.21e-07	9.73e-06	6.68064
MIR25	-0.583715	2.74279	-5.38888	1.22e-07	9.75e-06	6.67734
PIGCP1	0.364544	1.17442	5.38794	1.22e-07	9.78e-06	6.67263
COA3	-0.280453	4.98714	-5.38752	1.23e-07	9.78e-06	6.67056
PGM3	0.276215	2.52118	5.38663	1.23e-07	9.79e-06	6.66605
FBXL18	0.258746	1.0732	5.38652	1.23e-07	9.79e-06	6.66551
COMMD7	-0.354988	4.80188	-5.38634	1.23e-07	9.79e-06	6.66461
AIP	-0.301836	5.47223	-5.3862	1.23e-07	9.79e-06	6.66394
AP4E1	0.225667	1.54125	5.38488	1.24e-07	9.85e-06	6.65732
UBQLN1	0.315061	4.08949	5.38096	1.27e-07	1e-05	6.63766
KIAA0895L	-0.431817	2.54575	-5.37849	1.28e-07	1.01e-05	6.62531
AC092119.2	-0.22807	0.583895	-5.37759	1.29e-07	1.02e-05	6.62084
AC087385.1	0.240476	0.264067	5.3766	1.3e-07	1.02e-05	6.61587
AMOTL1	0.506499	2.45281	5.37553	1.3e-07	1.03e-05	6.61051
LINC00324	-0.307274	1.32141	-5.37472	1.31e-07	1.03e-05	6.60649
PCYT2	-0.413046	3.20901	-5.37265	1.32e-07	1.04e-05	6.59611
NOTCH2	0.434794	2.59633	5.3703	1.34e-07	1.05e-05	6.5844
SNORD123	-0.725972	1.81403	-5.37006	1.34e-07	1.05e-05	6.58319
RIC1	0.303165	1.8295	5.37004	1.34e-07	1.05e-05	6.58307
AC010343.3	0.313712	0.271798	5.36473	1.38e-07	1.08e-05	6.55657
AC110771.1	-0.0549393	0.129103	-5.36384	1.39e-07	1.08e-05	6.5521
AC020765.2	-0.373294	1.13564	-5.35991	1.41e-07	1.1e-05	6.53251
AL139089.1	-0.277615	1.01441	-5.35987	1.41e-07	1.1e-05	6.5323
FBXL15	-0.339518	2.72833	-5.35536	1.45e-07	1.12e-05	6.50982
AC232271.1	-0.234047	0.806971	-5.35046	1.48e-07	1.15e-05	6.48541
SLC25A43	0.474834	2.99838	5.34881	1.5e-07	1.16e-05	6.47721
MTPN	0.344156	5.43013	5.34867	1.5e-07	1.16e-05	6.47649
LINC00930	-0.801322	1.14987	-5.34854	1.5e-07	1.16e-05	6.47586
CCNA2	0.517936	3.62646	5.34766	1.51e-07	1.16e-05	6.47145
AL121829.2	-0.344169	0.616094	-5.3476	1.51e-07	1.16e-05	6.47117
CBL	0.316246	1.82363	5.34575	1.52e-07	1.17e-05	6.46197
AC008105.2	-0.423227	1.22571	-5.34507	1.53e-07	1.17e-05	6.45858
NPRL2	-0.331848	2.93281	-5.34239	1.55e-07	1.18e-05	6.44524
MYORG	0.428393	2.02034	5.34113	1.56e-07	1.19e-05	6.43898
PYROXD2	-0.499907	1.72658	-5.34023	1.56e-07	1.19e-05	6.43453
CLSPN	0.412972	1.33921	5.33988	1.57e-07	1.19e-05	6.43275
HDAC4-AS1	-0.254251	0.805718	-5.33987	1.57e-07	1.19e-05	6.43271
ZNF414	-0.281435	2.4319	-5.33982	1.57e-07	1.19e-05	6.43246
CD96	-0.52488	1.51867	-5.33969	1.57e-07	1.19e-05	6.43181
WASHC4	0.285988	2.5679	5.33889	1.58e-07	1.19e-05	6.42783
MOB3B	0.479544	1.45862	5.33406	1.62e-07	1.22e-05	6.40385
ZNF480	-0.334305	2.51824	-5.3331	1.62e-07	1.22e-05	6.39906
NRL	-0.139059	0.599959	-5.33301	1.62e-07	1.22e-05	6.39864
ZNF865	-0.283589	2.76526	-5.33294	1.62e-07	1.22e-05	6.39829
LMAN1	0.361484	4.32307	5.33249	1.63e-07	1.22e-05	6.39605
TTC28-AS1	-0.230446	1.07978	-5.33163	1.64e-07	1.23e-05	6.39176
MIR4435-2HG	0.452085	1.7051	5.32906	1.66e-07	1.24e-05	6.37903
DTD2	0.292138	2.33929	5.32733	1.67e-07	1.25e-05	6.37045
COPB1	0.281093	4.54747	5.32627	1.68e-07	1.26e-05	6.36519
ECI1	-0.358898	3.9301	-5.3253	1.69e-07	1.26e-05	6.36035
NDUFA7	-0.27365	1.78958	-5.32466	1.7e-07	1.26e-05	6.3572
AC073655.2	-0.194988	0.52669	-5.32353	1.7e-07	1.27e-05	6.35161
EIF3B	0.283531	5.01265	5.32317	1.71e-07	1.27e-05	6.3498
COL12A1	0.828459	3.57628	5.31995	1.74e-07	1.29e-05	6.33386
FAM3C	0.469083	3.78672	5.31768	1.76e-07	1.3e-05	6.3226
RNA5SP18	0.46794	0.759921	5.3151	1.78e-07	1.32e-05	6.30982
RANBP3	-0.193533	3.45344	-5.31371	1.79e-07	1.33e-05	6.30295
RAD9A	-0.372874	2.96479	-5.31313	1.8e-07	1.33e-05	6.30009
FOXA1	-0.991848	3.71759	-5.31158	1.81e-07	1.34e-05	6.29238
LDLRAD3	0.457845	1.54829	5.30387	1.89e-07	1.39e-05	6.25428
AL133410.1	-0.283857	0.722017	-5.30379	1.89e-07	1.39e-05	6.25389
GPHN	0.293946	1.69428	5.30364	1.89e-07	1.39e-05	6.25315
SIRT6	-0.270328	3.38916	-5.30297	1.89e-07	1.39e-05	6.24982
TBX2-AS1	-0.945401	2.34775	-5.30249	1.9e-07	1.39e-05	6.24744
CRTAC1	-1.13696	1.46187	-5.30125	1.91e-07	1.4e-05	6.24134
LIN7B	-0.368194	2.26241	-5.30067	1.92e-07	1.4e-05	6.23846
ACTN1	0.591633	4.53669	5.29963	1.93e-07	1.41e-05	6.23331
FHIT	-0.295208	0.901322	-5.29806	1.94e-07	1.42e-05	6.22558
HEATR1	0.322761	2.51027	5.29754	1.95e-07	1.42e-05	6.22297
ZNF606	-0.290091	1.30875	-5.29753	1.95e-07	1.42e-05	6.22295
GFOD1	0.376172	1.23766	5.2921	2e-07	1.45e-05	6.19616
ZNF653	-0.21529	1.65828	-5.29115	2.01e-07	1.46e-05	6.19146
ATOH8	-0.635676	1.07676	-5.29093	2.01e-07	1.46e-05	6.19039
PLEKHJ1	-0.340831	3.92739	-5.28984	2.03e-07	1.46e-05	6.18501
FUK	-0.306701	2.19646	-5.28862	2.04e-07	1.47e-05	6.17901
DEDD2	-0.278375	4.03803	-5.28763	2.05e-07	1.48e-05	6.17412
ZNF358	-0.476	4.77332	-5.28414	2.09e-07	1.5e-05	6.15692
WDR13	-0.287432	3.59283	-5.28083	2.12e-07	1.52e-05	6.14059
HSD17B12	0.288739	2.93268	5.2792	2.14e-07	1.54e-05	6.13256
GPSM3	-0.609462	3.32466	-5.27888	2.14e-07	1.54e-05	6.13099
GEMIN8	-0.283698	2.90095	-5.27847	2.15e-07	1.54e-05	6.12896
NEDD4	0.325024	1.59291	5.27525	2.18e-07	1.56e-05	6.11312
SFI1	-0.302337	1.87488	-5.27448	2.19e-07	1.56e-05	6.10933
TERF2IP	-0.278908	4.245	-5.27406	2.2e-07	1.56e-05	6.10727
RGL2	-0.344984	4.44743	-5.27398	2.2e-07	1.56e-05	6.1069
APBB3	-0.303573	1.89678	-5.27389	2.2e-07	1.56e-05	6.10643
ZFP2	-0.167011	0.37969	-5.27336	2.2e-07	1.57e-05	6.10387
UBALD2	-0.406077	5.99222	-5.27073	2.23e-07	1.58e-05	6.09092
LAMC1	0.467813	4.41197	5.27023	2.24e-07	1.59e-05	6.08847
AC104836.1	-0.106821	0.207285	-5.26987	2.24e-07	1.59e-05	6.08669
KIF2A	0.357032	2.45014	5.26664	2.28e-07	1.61e-05	6.07082
AC113191.1	0.506794	1.65338	5.26616	2.29e-07	1.61e-05	6.06845
JKAMP	0.254482	3.03422	5.26513	2.3e-07	1.61e-05	6.06339
PLIN3	0.379765	4.95658	5.26504	2.3e-07	1.61e-05	6.06295
AL513320.1	-0.259927	0.78291	-5.26455	2.3e-07	1.61e-05	6.06055
GMFB	0.311396	2.61347	5.26452	2.31e-07	1.61e-05	6.06038
FAM89B	-0.332725	4.47691	-5.26437	2.31e-07	1.61e-05	6.05967
AC015660.1	0.229917	0.237682	5.26433	2.31e-07	1.61e-05	6.05946
LUZP1	0.300564	2.4276	5.26421	2.31e-07	1.61e-05	6.05887
KATNAL1	0.351082	0.959897	5.2608	2.35e-07	1.64e-05	6.04215
AC012615.1	-0.338903	1.69197	-5.26078	2.35e-07	1.64e-05	6.04205
INTS6L	-0.394793	1.46417	-5.25885	2.37e-07	1.65e-05	6.03255
COX14	-0.345071	5.26301	-5.2587	2.37e-07	1.65e-05	6.03186
DNAAF5	0.266295	2.82586	5.25832	2.38e-07	1.65e-05	6.02996
MAPK1	0.297023	3.3537	5.25765	2.39e-07	1.66e-05	6.02669
CDCA2	0.398277	1.78311	5.25739	2.39e-07	1.66e-05	6.02538
DTNBP1	-0.297657	3.00691	-5.25717	2.39e-07	1.66e-05	6.02431
STARD3NL	0.296497	2.83607	5.25608	2.41e-07	1.66e-05	6.019
SPRR1B	1.62806	3.38737	5.2544	2.43e-07	1.67e-05	6.01076
ROCK1	0.327628	2.41942	5.25271	2.45e-07	1.69e-05	6.00244
TMUB2	-0.213336	4.04123	-5.25255	2.45e-07	1.69e-05	6.0017
MCF2L-AS1	-0.679919	1.62383	-5.25121	2.47e-07	1.7e-05	5.99511
AC116914.2	-0.302815	1.19954	-5.25036	2.48e-07	1.7e-05	5.99096
TEAD4	0.611503	2.74182	5.24941	2.49e-07	1.71e-05	5.9863
HMGCL	-0.294677	3.28544	-5.24821	2.5e-07	1.71e-05	5.98042
FBXW4	-0.301955	3.62924	-5.24731	2.52e-07	1.72e-05	5.97602
AC106782.2	-0.408278	1.95575	-5.24666	2.52e-07	1.72e-05	5.97285
MAP3K10	-0.31491	2.41176	-5.24656	2.53e-07	1.72e-05	5.97234
C1orf35	-0.277646	2.97652	-5.24512	2.54e-07	1.73e-05	5.96527
ROMO1	-0.405209	6.83395	-5.24395	2.56e-07	1.74e-05	5.95955
DSG1	0.636203	0.516966	5.24244	2.58e-07	1.75e-05	5.95215
CCNC	0.286454	3.13146	5.24161	2.59e-07	1.76e-05	5.94813
AC003102.1	-0.400847	1.66595	-5.24139	2.59e-07	1.76e-05	5.94704
NBPF11	-0.32517	1.16476	-5.24113	2.6e-07	1.76e-05	5.94574
COG5	0.265781	2.17822	5.23834	2.63e-07	1.78e-05	5.93209
DHRS9	0.740914	1.06638	5.23792	2.64e-07	1.78e-05	5.93005
AL391704.1	0.0671618	0.0366636	5.23723	2.65e-07	1.79e-05	5.92669
AC104024.2	0.159074	0.198695	5.23602	2.66e-07	1.79e-05	5.92075
COQ9	-0.256172	3.76315	-5.23441	2.69e-07	1.81e-05	5.91289
ATP13A3	0.371449	3.17491	5.23393	2.69e-07	1.81e-05	5.91058
PLEKHM3	0.210142	0.508911	5.23283	2.71e-07	1.82e-05	5.90518
GMFG	-0.67362	3.32465	-5.2297	2.75e-07	1.84e-05	5.88989
SPINT1-AS1	-0.554566	3.44919	-5.22875	2.76e-07	1.85e-05	5.88525
ECHS1	-0.366281	6.7819	-5.22769	2.78e-07	1.86e-05	5.88008
PABPC1L	-0.562339	3.06994	-5.22179	2.86e-07	1.91e-05	5.85131
GEMIN7-AS1	-0.234083	0.66801	-5.22103	2.87e-07	1.91e-05	5.84759
SGTB	0.264904	0.979864	5.22082	2.88e-07	1.91e-05	5.84657
AATBC	-0.762987	1.91808	-5.2206	2.88e-07	1.91e-05	5.84551
ADCY9	0.315758	1.36754	5.22021	2.89e-07	1.91e-05	5.8436
NUDCD3	0.227549	3.45359	5.22015	2.89e-07	1.91e-05	5.8433
PPP1R12C	-0.289226	3.66118	-5.21987	2.89e-07	1.91e-05	5.84197
SLC25A38	-0.296651	4.31486	-5.21938	2.9e-07	1.91e-05	5.83956
SHTN1	0.428026	1.69953	5.21935	2.9e-07	1.91e-05	5.8394
AC009803.1	-0.112593	0.126397	-5.2193	2.9e-07	1.91e-05	5.83918
AC103810.3	-0.591563	2.62676	-5.2186	2.91e-07	1.92e-05	5.83577
PDIA6	0.453325	5.62798	5.21736	2.93e-07	1.93e-05	5.82972
TFPT	-0.379695	4.40128	-5.21725	2.93e-07	1.93e-05	5.82915
ETV2	-0.254906	0.947037	-5.21668	2.94e-07	1.93e-05	5.82639
NR1H2	-0.23778	4.72988	-5.2142	2.97e-07	1.95e-05	5.81434
VANGL1	0.317388	2.57232	5.21142	3.02e-07	1.98e-05	5.80081
SULF2	0.930146	3.22808	5.21039	3.03e-07	1.98e-05	5.79575
IPO5P1	-0.579328	2.02408	-5.20941	3.05e-07	1.99e-05	5.79099
FUBP3	0.261626	3.25565	5.2075	3.08e-07	2.01e-05	5.78169
AC108134.4	-0.221199	0.658604	-5.20447	3.12e-07	2.04e-05	5.76697
MFAP3	0.343831	1.57183	5.20261	3.15e-07	2.05e-05	5.75792
PNPLA2	-0.455318	4.83325	-5.20188	3.17e-07	2.06e-05	5.75438
LIVAR	0.114562	0.119353	5.20137	3.17e-07	2.06e-05	5.75192
VSIG2	-1.44857	4.90113	-5.19946	3.2e-07	2.08e-05	5.74264
CCDC61	-0.318908	2.83899	-5.19865	3.22e-07	2.09e-05	5.73867
HKR1	-0.304882	2.56875	-5.198	3.23e-07	2.09e-05	5.73556
HIF1A	0.51291	5.00449	5.19726	3.24e-07	2.09e-05	5.73195
CFAP410	-0.298807	1.98522	-5.19673	3.25e-07	2.1e-05	5.72935
PSPH	0.419958	2.72206	5.19616	3.26e-07	2.1e-05	5.72662
CLMP	0.684997	1.89604	5.19523	3.27e-07	2.11e-05	5.7221
UQCR11	-0.314164	4.99454	-5.19427	3.29e-07	2.12e-05	5.71744
STAC3	-0.358701	1.72512	-5.19275	3.31e-07	2.13e-05	5.71006
PYM1	-0.29273	4.28792	-5.19167	3.33e-07	2.14e-05	5.70482
AL359921.2	-0.319549	1.51964	-5.19164	3.33e-07	2.14e-05	5.70467
ZNF383	-0.187021	1.09982	-5.1901	3.36e-07	2.15e-05	5.69717
SNHG12	-0.355444	2.99827	-5.18771	3.4e-07	2.17e-05	5.68558
SLC12A8	0.461609	2.04592	5.18725	3.41e-07	2.18e-05	5.68335
AC099343.3	-0.25339	1.41514	-5.18702	3.41e-07	2.18e-05	5.68227
TTC7A	0.391534	2.93199	5.18536	3.44e-07	2.19e-05	5.67422
BCAT2	-0.657305	4.51368	-5.18344	3.47e-07	2.21e-05	5.66492
AC011481.3	-0.132005	0.397612	-5.18173	3.5e-07	2.23e-05	5.65662
LINC00685	-0.419982	1.35893	-5.18073	3.52e-07	2.24e-05	5.65177
KRTCAP2	-0.291016	3.1047	-5.17768	3.58e-07	2.27e-05	5.63702
ST3GAL5	-0.731123	2.53561	-5.17752	3.58e-07	2.27e-05	5.63622
SERPINB13	0.937605	1.29039	5.1756	3.61e-07	2.28e-05	5.62696
AK4P1	0.180827	0.376584	5.17558	3.61e-07	2.28e-05	5.62684
TWISTNB	0.292136	2.74312	5.17524	3.62e-07	2.28e-05	5.62519
NID2	0.505461	1.40283	5.17462	3.63e-07	2.29e-05	5.62222
HEIH	-0.481537	4.11948	-5.17234	3.67e-07	2.31e-05	5.61117
LGALS9	-0.669503	3.58463	-5.17187	3.68e-07	2.32e-05	5.60892
AC010618.3	-0.229836	0.643336	-5.17105	3.7e-07	2.32e-05	5.60492
DCBLD2	0.599097	2.10735	5.17032	3.71e-07	2.33e-05	5.60142
SH3BP5-AS1	-0.36259	1.2321	-5.17019	3.71e-07	2.33e-05	5.60076
IL31RA	0.204295	0.15956	5.16752	3.76e-07	2.36e-05	5.58789
TMEM198B	-0.379049	2.55645	-5.16716	3.77e-07	2.36e-05	5.58613
AL022328.2	-0.312515	1.5348	-5.16624	3.79e-07	2.37e-05	5.58171
RNF5	-0.313009	5.16391	-5.16301	3.85e-07	2.4e-05	5.56612
LINC00705	0.0866356	0.0819962	5.16139	3.88e-07	2.42e-05	5.55828
SPTLC1	0.384572	3.75448	5.16136	3.88e-07	2.42e-05	5.55812
TTK	0.425295	2.34711	5.15648	3.98e-07	2.47e-05	5.53459
AC112184.1	-0.238116	0.462254	-5.15606	3.98e-07	2.47e-05	5.53255
BOLA1	-0.405615	3.67277	-5.15572	3.99e-07	2.48e-05	5.53091
TUBB6	0.852351	3.79624	5.15514	4e-07	2.48e-05	5.52813
NDUFA13	-0.353645	4.03287	-5.15422	4.02e-07	2.49e-05	5.52368
AURKA	0.480925	3.49262	5.15372	4.03e-07	2.49e-05	5.52127
VKORC1L1	0.27806	3.29531	5.15263	4.05e-07	2.5e-05	5.51603
THBS1	0.796865	4.5345	5.15095	4.09e-07	2.52e-05	5.50794
RPL34	-0.37923	6.94555	-5.15069	4.09e-07	2.52e-05	5.5067
ORMDL3	-0.432972	5.01521	-5.15062	4.09e-07	2.52e-05	5.50635
NEK7	0.396017	3.25468	5.14881	4.13e-07	2.54e-05	5.49763
AC078880.2	-0.140869	0.12656	-5.14815	4.14e-07	2.54e-05	5.49443
AC073548.1	-0.260327	0.922698	-5.14555	4.2e-07	2.57e-05	5.48195
TMPPE	0.193745	0.600006	5.14394	4.23e-07	2.59e-05	5.47416
COL5A2	0.87427	4.16448	5.14333	4.25e-07	2.6e-05	5.47124
HERPUD2	0.196455	3.4899	5.14252	4.26e-07	2.61e-05	5.46736
SGO2	0.299723	1.53261	5.14165	4.28e-07	2.61e-05	5.46315
SOX9	0.84635	2.85178	5.14144	4.29e-07	2.61e-05	5.46217
AC018638.5	-0.374728	3.56142	-5.13915	4.34e-07	2.64e-05	5.45111
STARD4	0.449041	1.29109	5.13834	4.35e-07	2.65e-05	5.44725
TBX2	-0.989089	3.44848	-5.13792	4.36e-07	2.65e-05	5.44521
TADA3	-0.300542	4.77667	-5.13546	4.42e-07	2.68e-05	5.43341
DBF4P1	0.0392659	0.0907099	5.13495	4.43e-07	2.68e-05	5.43094
NAMPTP1	0.456487	1.24153	5.13479	4.43e-07	2.68e-05	5.43017
KRTDAP	1.37501	1.74206	5.13371	4.45e-07	2.69e-05	5.42501
MELK	0.556374	3.18644	5.13327	4.46e-07	2.7e-05	5.42288
RPL13AP25	-0.485711	3.35623	-5.13289	4.47e-07	2.7e-05	5.42104
UBXN11	-0.374154	2.72892	-5.13272	4.48e-07	2.7e-05	5.42024
AC090954.1	-0.503738	0.790766	-5.13214	4.49e-07	2.7e-05	5.41746
AC068338.3	-0.297811	0.975204	-5.13021	4.53e-07	2.73e-05	5.40819
KRT6B	1.56988	1.97302	5.12822	4.58e-07	2.75e-05	5.3986
ACTR3	0.288726	4.20979	5.12783	4.59e-07	2.75e-05	5.39677
CCDC189	-0.189609	0.649135	-5.12757	4.59e-07	2.75e-05	5.3955
AC135050.3	-0.22764	0.590633	-5.12698	4.61e-07	2.75e-05	5.39266
ACP6	-0.449706	1.94978	-5.12694	4.61e-07	2.75e-05	5.39249
SAFB	-0.174116	4.21077	-5.12688	4.61e-07	2.75e-05	5.39217
ZNF574	-0.232299	2.72	-5.12667	4.61e-07	2.75e-05	5.39118
CAB39	0.329564	3.95795	5.12542	4.64e-07	2.77e-05	5.38518
AC087741.1	-0.347083	1.18659	-5.12487	4.65e-07	2.77e-05	5.38257
AL390728.6	-0.434601	2.94979	-5.12466	4.66e-07	2.77e-05	5.38153
AC023908.3	-0.120561	0.28979	-5.12427	4.67e-07	2.77e-05	5.37968
GPR37	0.414246	0.657132	5.12153	4.73e-07	2.81e-05	5.36652
KRTAP5-9	-0.593756	1.02681	-5.12078	4.75e-07	2.82e-05	5.36296
CYBC1	-0.266847	3.762	-5.12012	4.77e-07	2.82e-05	5.3598
E4F1	-0.250692	2.70213	-5.1201	4.77e-07	2.82e-05	5.35969
SUMF2	0.357413	5.05359	5.11935	4.78e-07	2.83e-05	5.35607
TMEM17	0.209475	0.993167	5.11906	4.79e-07	2.83e-05	5.35469
POLR3G	0.322657	0.889171	5.11834	4.81e-07	2.83e-05	5.35124
TMC7	-0.54716	1.89985	-5.11668	4.85e-07	2.85e-05	5.34327
PHF12	-0.257702	2.49735	-5.11627	4.86e-07	2.85e-05	5.3413
ESYT2	0.335202	3.95237	5.11623	4.86e-07	2.85e-05	5.34111
GPR160	-0.720422	2.52346	-5.11616	4.86e-07	2.85e-05	5.34081
CD27-AS1	-0.343867	2.65611	-5.1159	4.87e-07	2.85e-05	5.33957
RNGTT	0.237478	2.23433	5.11514	4.89e-07	2.86e-05	5.33591
DDX18	0.256519	3.34642	5.11475	4.9e-07	2.86e-05	5.33404
LINC00653	-0.245529	0.773378	-5.11167	4.97e-07	2.9e-05	5.3193
SHROOM1	-0.627858	2.98091	-5.11138	4.98e-07	2.91e-05	5.3179
RPL28	-0.388205	7.25585	-5.10983	5.02e-07	2.92e-05	5.31051
RXRB	-0.208224	3.72317	-5.1095	5.02e-07	2.93e-05	5.30893
TEPSIN	-0.267877	2.36007	-5.10855	5.05e-07	2.93e-05	5.30437
SLC25A32	0.291482	3.03094	5.10849	5.05e-07	2.93e-05	5.30407
TMEM160	-0.43387	3.79314	-5.10787	5.07e-07	2.94e-05	5.30114
ACADS	-0.328721	3.40877	-5.10754	5.07e-07	2.94e-05	5.29952
MED29	-0.251276	4.15542	-5.10753	5.07e-07	2.94e-05	5.29951
BCAT1	0.643464	1.69321	5.10621	5.11e-07	2.95e-05	5.2932
CNTNAP3	0.181722	0.243228	5.10606	5.11e-07	2.95e-05	5.29245
GCNT1P3	0.0777357	0.0615904	5.10577	5.12e-07	2.95e-05	5.29107
AC004475.1	-0.186848	2.89534	-5.10566	5.12e-07	2.95e-05	5.29056
MMP24OS	-0.416875	3.55144	-5.1049	5.14e-07	2.96e-05	5.28692
FAM174B	-0.877433	3.50724	-5.10399	5.16e-07	2.97e-05	5.28259
DYNLRB2	-0.155058	0.302866	-5.10394	5.17e-07	2.97e-05	5.28235
LENG8	-0.410519	4.42462	-5.10312	5.19e-07	2.98e-05	5.27842
FRMD4B	0.389229	1.58145	5.10301	5.19e-07	2.98e-05	5.2779
IRF3	-0.287452	4.78089	-5.10236	5.21e-07	2.98e-05	5.27479
ATP10D	0.40227	1.83512	5.10136	5.23e-07	2.99e-05	5.27002
TLR6	0.268923	0.538546	5.10105	5.24e-07	3e-05	5.26852
AL353622.1	-0.307361	1.01802	-5.10072	5.25e-07	3e-05	5.26694
ZNF814	-0.25045	0.98199	-5.09892	5.3e-07	3.02e-05	5.25832
C1orf159	-0.315341	2.28881	-5.09832	5.31e-07	3.03e-05	5.2555
ATF7IP2	-0.545766	1.89406	-5.09827	5.31e-07	3.03e-05	5.25522
SLC2A8	-0.412462	3.01512	-5.09724	5.34e-07	3.04e-05	5.25034
NEIL3	0.355716	1.0836	5.09642	5.36e-07	3.05e-05	5.24643
ARGLU1	-0.391283	4.3225	-5.09576	5.38e-07	3.05e-05	5.24324
SEC31B	-0.240106	0.747672	-5.09562	5.38e-07	3.05e-05	5.24261
FAM83B	0.547368	2.14844	5.09522	5.39e-07	3.05e-05	5.2407
EEF1AKMT1	-0.289795	2.58008	-5.09485	5.4e-07	3.06e-05	5.23891
VIPR1	-0.610901	1.73723	-5.0947	5.41e-07	3.06e-05	5.23819
AC020663.2	-0.233419	0.616078	-5.09435	5.42e-07	3.06e-05	5.23654
CACFD1	-0.426443	3.48657	-5.09404	5.43e-07	3.06e-05	5.23507
P4HTM	-0.442429	2.62945	-5.09389	5.43e-07	3.06e-05	5.23432
LTBP1	0.594753	3.55223	5.09356	5.44e-07	3.06e-05	5.23274
AC005261.3	-0.287234	2.42767	-5.09291	5.46e-07	3.07e-05	5.22964
TGFBI	0.982382	4.21636	5.08772	5.6e-07	3.14e-05	5.20492
AL627402.1	0.3214	1.01998	5.08759	5.6e-07	3.14e-05	5.20431
DGAT1	-0.349359	3.9955	-5.0853	5.66e-07	3.17e-05	5.1934
CCDC146	-0.324819	1.17387	-5.08376	5.71e-07	3.2e-05	5.18602
AC073569.2	0.22698	0.752021	5.08167	5.77e-07	3.23e-05	5.17609
SNORD104	-0.615906	4.5426	-5.08004	5.81e-07	3.25e-05	5.16835
AC103706.1	-0.432018	1.49214	-5.07921	5.84e-07	3.26e-05	5.16437
ARL4C	0.604616	3.65977	5.0757	5.94e-07	3.31e-05	5.14767
HOXB3	-0.579929	1.97166	-5.07569	5.94e-07	3.31e-05	5.14762
AC005785.1	-0.246574	0.749294	-5.07557	5.94e-07	3.31e-05	5.14704
KIF1B	0.275171	1.89754	5.07533	5.95e-07	3.31e-05	5.14594
TGFBR1	0.437235	2.94677	5.07462	5.97e-07	3.32e-05	5.14255
IARS2	0.321408	4.8241	5.07293	6.02e-07	3.34e-05	5.1345
UXT	-0.270045	5.48913	-5.0729	6.02e-07	3.34e-05	5.13438
INCENP	0.396829	2.94481	5.0716	6.06e-07	3.35e-05	5.12817
AC095057.3	-0.275872	0.808801	-5.07122	6.07e-07	3.35e-05	5.12637
SUFU	-0.265197	2.42488	-5.07113	6.08e-07	3.35e-05	5.12593
MKLN1	0.261616	1.65903	5.07095	6.08e-07	3.35e-05	5.12509
NAA30	0.221961	1.98605	5.07071	6.09e-07	3.35e-05	5.12395
IFT27	-0.314672	2.06566	-5.07064	6.09e-07	3.35e-05	5.12361
LRFN2	-0.281651	0.429799	-5.07061	6.09e-07	3.35e-05	5.12348
SNX6	0.318263	3.99316	5.06994	6.11e-07	3.36e-05	5.1203
FGD6	0.363703	1.57453	5.0681	6.17e-07	3.39e-05	5.11153
TMEM178A	-0.402585	0.765298	-5.06725	6.19e-07	3.4e-05	5.10752
PRMT3	0.251978	1.99508	5.06666	6.21e-07	3.4e-05	5.10469
KLHDC4	-0.246904	2.09271	-5.06612	6.23e-07	3.41e-05	5.10215
ZNF76	-0.270931	2.61526	-5.06558	6.24e-07	3.41e-05	5.09958
KIF18A	0.353094	1.48016	5.06551	6.25e-07	3.41e-05	5.09926
KLK7	0.760541	0.723241	5.06419	6.29e-07	3.43e-05	5.093
AC107952.2	-0.289004	0.73285	-5.06346	6.31e-07	3.44e-05	5.08951
LINC01523	0.0259978	0.013106	5.06307	6.32e-07	3.44e-05	5.08767
CYP4F35P	-0.457291	0.52156	-5.06266	6.34e-07	3.45e-05	5.08572
EFHD2	-0.39844	6.50777	-5.06231	6.35e-07	3.45e-05	5.08404
AC005009.1	-0.320372	0.453889	-5.06144	6.37e-07	3.46e-05	5.07995
SPSB3	-0.131328	0.762699	-5.06086	6.39e-07	3.46e-05	5.07718
ZSCAN26	-0.26073	2.1145	-5.06079	6.39e-07	3.46e-05	5.07686
TPRA1	-0.222576	4.01301	-5.06057	6.4e-07	3.46e-05	5.07579
SLC39A10	0.33513	2.22543	5.06015	6.41e-07	3.47e-05	5.07379
KDM8	-0.164468	1.07634	-5.05619	6.54e-07	3.53e-05	5.05504
TMEM38B	0.338487	1.61584	5.0559	6.55e-07	3.53e-05	5.05367
ARL16	-0.316236	3.70396	-5.05578	6.55e-07	3.53e-05	5.05307
FAM162A	-0.459307	4.47788	-5.05573	6.56e-07	3.53e-05	5.05284
AC127024.6	-0.207141	0.547536	-5.05493	6.58e-07	3.54e-05	5.04905
PRMT7	-0.26633	2.37113	-5.05304	6.64e-07	3.57e-05	5.04013
PLIN4	-0.68944	1.99741	-5.05147	6.69e-07	3.59e-05	5.03265
SYNE2	0.374027	1.97764	5.05104	6.71e-07	3.6e-05	5.03064
AC093752.1	-0.22276	1.13996	-5.04986	6.75e-07	3.61e-05	5.02503
HSPD1	0.337243	6.17938	5.0477	6.82e-07	3.65e-05	5.01483
MYH16	0.232356	0.203154	5.04535	6.9e-07	3.69e-05	5.00372
AC078820.1	0.158244	0.172155	5.04457	6.92e-07	3.7e-05	5.00001
PRDM1	0.478227	2.01654	5.04373	6.95e-07	3.71e-05	4.99601
NOL12	-0.24486	1.74352	-5.04335	6.97e-07	3.71e-05	4.99422
RPL3P4	-0.566842	4.79956	-5.04234	7e-07	3.73e-05	4.98944
AC026765.2	-0.2514	0.4137	-5.04222	7.01e-07	3.73e-05	4.98887
SNCG	-1.31041	6.89328	-5.04158	7.03e-07	3.73e-05	4.98587
C19orf53	-0.310961	6.36088	-5.04126	7.04e-07	3.74e-05	4.98437
ATP5ME	-0.392009	6.73301	-5.04016	7.08e-07	3.75e-05	4.97913
TM7SF2	-0.698014	3.36179	-5.04008	7.08e-07	3.75e-05	4.97876
YJU2	-0.276555	3.88239	-5.03997	7.08e-07	3.75e-05	4.97826
ECT2	0.47952	3.12649	5.03937	7.1e-07	3.76e-05	4.97544
PCBD1	-0.424317	5.4429	-5.03889	7.12e-07	3.76e-05	4.97316
ERGIC2	0.228091	3.28914	5.03821	7.14e-07	3.77e-05	4.96993
CTSE	-1.17301	2.0014	-5.03572	7.23e-07	3.81e-05	4.95816
AC009803.2	-0.0942926	0.0964499	-5.03407	7.29e-07	3.84e-05	4.95037
C6orf226	-0.410081	3.57337	-5.03372	7.3e-07	3.84e-05	4.94872
ARF6	0.267208	5.64187	5.03213	7.36e-07	3.87e-05	4.94122
RERE	-0.335309	3.49789	-5.03198	7.37e-07	3.87e-05	4.94051
CEP55	0.490687	3.36695	5.03178	7.37e-07	3.87e-05	4.93959
AC003072.1	-0.368204	2.23314	-5.03071	7.41e-07	3.89e-05	4.9345
SND1	0.265039	5.07588	5.02959	7.45e-07	3.9e-05	4.92922
SPRR2A	1.21854	1.58409	5.02597	7.59e-07	3.97e-05	4.91214
TOX3	-0.884656	1.65703	-5.02443	7.64e-07	3.99e-05	4.9049
RRNAD1	-0.278466	3.55374	-5.02415	7.65e-07	4e-05	4.90357
USF1	-0.3584	5.09517	-5.02346	7.68e-07	4.01e-05	4.90033
DSC1	0.292643	0.192285	5.02257	7.71e-07	4.01e-05	4.89615
DM1-AS	-0.221223	0.844767	-5.02252	7.72e-07	4.01e-05	4.89591
LAMTOR2	-0.3393	5.38718	-5.02248	7.72e-07	4.01e-05	4.89571
ITGB8	0.500985	1.40098	5.02241	7.72e-07	4.01e-05	4.89539
SSR3	0.2625	5.05298	5.02049	7.79e-07	4.04e-05	4.88633
FUCA1	-0.522229	5.07761	-5.01998	7.81e-07	4.05e-05	4.8839
SMC6	0.280901	2.30395	5.01958	7.83e-07	4.06e-05	4.88206
ASMTL-AS1	-0.483376	1.97377	-5.01905	7.85e-07	4.06e-05	4.87955
AC026877.1	0.17085	0.583055	5.01905	7.85e-07	4.06e-05	4.87952
PICALM	0.262795	4.78418	5.01875	7.86e-07	4.06e-05	4.87814
SNHG9	-0.568123	3.15748	-5.01854	7.87e-07	4.06e-05	4.87714
AC068620.2	-0.207889	0.61149	-5.01803	7.89e-07	4.07e-05	4.87472
CERCAM	0.632772	3.64854	5.01716	7.92e-07	4.08e-05	4.87066
RNF169	0.31044	1.25878	5.01713	7.92e-07	4.08e-05	4.87049
DSC3	1.24608	2.60553	5.01671	7.94e-07	4.08e-05	4.86855
SMIM22	-0.930273	4.22934	-5.01654	7.95e-07	4.08e-05	4.86774
ASCC1	0.225804	2.34003	5.01531	7.99e-07	4.1e-05	4.86192
AL354919.2	-0.585377	1.04702	-5.01373	8.06e-07	4.13e-05	4.8545
ATG4B	-0.246744	3.26967	-5.01335	8.07e-07	4.13e-05	4.8527
TMEM185B	0.330075	3.34877	5.01314	8.08e-07	4.13e-05	4.85174
BOLA3P2	0.164525	0.102834	5.01182	8.13e-07	4.16e-05	4.84549
PLEKHG3	0.374774	2.5253	5.01156	8.14e-07	4.16e-05	4.84427
SLC9B2	0.284063	0.923121	5.01138	8.15e-07	4.16e-05	4.84345
DNAL4	-0.317963	3.46814	-5.01122	8.15e-07	4.16e-05	4.84267
IL36RN	0.558904	0.672639	5.01103	8.16e-07	4.16e-05	4.84182
ARHGEF10L	-0.438532	3.22795	-5.01025	8.19e-07	4.17e-05	4.83813
AC018695.6	-0.554318	1.46803	-5.00918	8.24e-07	4.19e-05	4.8331
MED25	-0.239643	3.65695	-5.00901	8.24e-07	4.19e-05	4.83229
TRAF4	-0.451433	5.10825	-5.00819	8.28e-07	4.2e-05	4.82842
AC004837.2	0.145911	0.234734	5.00756	8.3e-07	4.21e-05	4.8255
EHMT2-AS1	-0.152044	0.292202	-5.00722	8.32e-07	4.21e-05	4.82388
CCNK	0.218264	1.097	5.00409	8.44e-07	4.27e-05	4.80917
UBE2G1	0.294103	3.48832	5.00382	8.45e-07	4.27e-05	4.80792
EXT2	0.316513	4.03606	5.0037	8.46e-07	4.27e-05	4.80737
CRTC2	-0.242225	4.29754	-5.0028	8.5e-07	4.29e-05	4.80313
PHKG2	-0.261041	2.63005	-5.00205	8.53e-07	4.3e-05	4.79957
CAD	0.325466	3.30749	5.00162	8.55e-07	4.3e-05	4.79757
KLC3	0.560757	1.60226	5.00076	8.58e-07	4.32e-05	4.79353
ZNF213-AS1	-0.272819	1.60124	-4.99959	8.63e-07	4.33e-05	4.78805
AL662795.2	-0.340746	1.91714	-4.99956	8.63e-07	4.33e-05	4.7879
IDUA	-0.459197	2.52254	-4.99716	8.73e-07	4.38e-05	4.77665
CBX7	-0.367048	1.91012	-4.99664	8.76e-07	4.39e-05	4.77419
TAF1C	-0.303275	3.35719	-4.9962	8.77e-07	4.39e-05	4.77215
HEATR5A	0.217893	1.42842	4.9961	8.78e-07	4.39e-05	4.77166
PEX11G	-0.369435	2.13654	-4.99608	8.78e-07	4.39e-05	4.77157
AC093458.2	-0.190084	0.279566	-4.99491	8.83e-07	4.41e-05	4.76609
AC027348.1	-0.348388	0.588069	-4.99018	9.04e-07	4.51e-05	4.74392
UQCR10	-0.369036	6.68852	-4.98894	9.09e-07	4.53e-05	4.7381
ENSA	-0.306254	5.44205	-4.98816	9.13e-07	4.54e-05	4.73447
TXNRD1	0.611307	3.48598	4.98663	9.19e-07	4.57e-05	4.72729
AC112491.1	-0.435481	1.60556	-4.98617	9.21e-07	4.58e-05	4.72512
RPL37P1	-0.430225	0.971703	-4.98505	9.27e-07	4.6e-05	4.71987
AGO2	0.30976	2.16662	4.98461	9.28e-07	4.6e-05	4.7178
BGLAP	-0.251361	0.74095	-4.9844	9.29e-07	4.6e-05	4.71683
AL023775.1	0.0134476	0.0109333	4.98348	9.34e-07	4.62e-05	4.71254
TNFRSF12A	0.651707	5.09159	4.98223	9.39e-07	4.65e-05	4.7067
ABCA12	0.442736	0.746376	4.98109	9.45e-07	4.67e-05	4.70135
AC078909.2	-0.248746	0.493466	-4.97825	9.58e-07	4.73e-05	4.68807
UACA	0.319564	2.15189	4.97791	9.59e-07	4.73e-05	4.68647
ELK3	0.405839	3.60295	4.9777	9.6e-07	4.73e-05	4.68552
STRN3	0.267341	2.65464	4.9772	9.63e-07	4.74e-05	4.68317
GATA3-AS1	-0.802295	2.00972	-4.97675	9.65e-07	4.74e-05	4.68104
TMEM65	0.345466	1.84097	4.97625	9.67e-07	4.75e-05	4.67872
C19orf44	-0.186759	1.35393	-4.97537	9.71e-07	4.77e-05	4.67462
SNX18P7	0.244823	0.595311	4.97484	9.74e-07	4.77e-05	4.67213
AP002840.2	-0.236188	0.904674	-4.97481	9.74e-07	4.77e-05	4.67198
ARL5A	0.274929	2.65367	4.97413	9.77e-07	4.78e-05	4.66879
AL645940.1	-0.232143	0.547964	-4.97308	9.82e-07	4.8e-05	4.66388
SPTBN1	0.427403	3.83513	4.97304	9.82e-07	4.8e-05	4.66371
ZC3H14	0.177325	1.53121	4.97298	9.82e-07	4.8e-05	4.66343
RAD51-AS1	-0.336877	1.673	-4.97215	9.86e-07	4.81e-05	4.65956
AC040162.3	-0.121961	0.485381	-4.97182	9.88e-07	4.81e-05	4.65802
SMURF2	0.27797	2.60815	4.97169	9.89e-07	4.81e-05	4.65742
SIGMAR1	0.350046	5.26462	4.97072	9.93e-07	4.83e-05	4.65289
ERCC6L2	0.181825	0.980028	4.97015	9.96e-07	4.84e-05	4.65024
ME3	-0.487413	2.32687	-4.96922	1e-06	4.86e-05	4.64586
CDH23	-0.419534	0.88848	-4.96742	1.01e-06	4.9e-05	4.63746
STAG3L5P-PVRIG2P-PILRB	-0.20979	0.938215	-4.96482	1.02e-06	4.95e-05	4.62535
NCAPD2	0.412824	4.26555	4.96283	1.03e-06	5e-05	4.61605
NDC1	0.305486	3.35365	4.96225	1.03e-06	5.01e-05	4.61337
ST3GAL6	0.233618	0.572813	4.96182	1.04e-06	5.01e-05	4.61137
YBEY	-0.358297	2.34138	-4.95954	1.05e-06	5.06e-05	4.60072
BCDIN3D	-0.180342	1.30477	-4.95891	1.05e-06	5.08e-05	4.59781
AL390294.1	-0.586337	1.27548	-4.9573	1.06e-06	5.11e-05	4.59027
MIGA2	-0.333881	2.66632	-4.95718	1.06e-06	5.11e-05	4.58972
LINC02595	0.321857	0.558399	4.95688	1.06e-06	5.11e-05	4.58832
MUC16	0.42213	0.36007	4.95685	1.06e-06	5.11e-05	4.58819
AC073130.1	0.0433181	0.0390557	4.95465	1.07e-06	5.16e-05	4.57794
SIGLEC15	-0.583751	1.2578	-4.95299	1.08e-06	5.19e-05	4.5702
AC008764.6	-0.188254	0.67305	-4.95175	1.09e-06	5.22e-05	4.56446
NDUFB4	-0.254967	5.68358	-4.94917	1.1e-06	5.28e-05	4.55244
AHSA2P	-0.419411	2.6398	-4.94833	1.11e-06	5.3e-05	4.54852
AC013451.2	0.123628	0.0931845	4.94819	1.11e-06	5.3e-05	4.54789
ZNF576	-0.22761	2.51855	-4.94703	1.11e-06	5.32e-05	4.54251
AC026979.3	-0.128921	0.433407	-4.94537	1.12e-06	5.36e-05	4.53478
AKAP17A	-0.347192	3.88707	-4.94479	1.13e-06	5.37e-05	4.53206
ALDH4A1	-0.562474	3.64536	-4.94307	1.14e-06	5.41e-05	4.52407
UNC93B1	-0.438001	4.43388	-4.94227	1.14e-06	5.43e-05	4.52036
TDO2	0.372535	0.910006	4.94151	1.14e-06	5.44e-05	4.51683
AC005041.1	-0.386885	1.70631	-4.94042	1.15e-06	5.47e-05	4.51178
PRXL2A	-0.55997	4.45614	-4.93956	1.16e-06	5.48e-05	4.50779
MCM10	0.399305	1.86815	4.9393	1.16e-06	5.48e-05	4.50655
FKTN	0.233697	1.59326	4.93917	1.16e-06	5.48e-05	4.50597
DEGS2	-0.727411	1.90594	-4.93888	1.16e-06	5.48e-05	4.50464
AC093908.1	0.10648	0.160637	4.93885	1.16e-06	5.48e-05	4.50446
ALOX5	-0.741297	4.08408	-4.93705	1.17e-06	5.53e-05	4.49612
XPO4	0.230406	1.92439	4.93643	1.17e-06	5.54e-05	4.49325
PMEPA1	0.780165	3.62097	4.93604	1.17e-06	5.54e-05	4.49145
SELENOK	-0.262982	4.30156	-4.93561	1.18e-06	5.55e-05	4.48944
HIP1R	-0.3804	3.63062	-4.93454	1.18e-06	5.57e-05	4.48449
WASH3P	-0.272073	2.09369	-4.93398	1.19e-06	5.58e-05	4.48187
LINC01948	0.118864	0.151725	4.93377	1.19e-06	5.58e-05	4.48091
GCLM	0.566157	3.01138	4.9334	1.19e-06	5.59e-05	4.47918
MYOSLID	0.501662	0.689297	4.9327	1.19e-06	5.6e-05	4.47593
GMIP	-0.322152	3.45379	-4.93109	1.2e-06	5.64e-05	4.46846
CDK10	-0.315573	3.38177	-4.93066	1.21e-06	5.65e-05	4.46648
PRR3	-0.259395	2.24134	-4.93012	1.21e-06	5.66e-05	4.46396
GGT6	-0.974399	3.68645	-4.92992	1.21e-06	5.66e-05	4.46304
BMP1	0.470739	2.85814	4.92873	1.22e-06	5.68e-05	4.45753
WASHC1	-0.356814	2.41202	-4.92864	1.22e-06	5.68e-05	4.45712
ACLY	0.314891	5.13646	4.92775	1.22e-06	5.7e-05	4.45299
FMC1	-0.360667	2.78962	-4.92499	1.24e-06	5.78e-05	4.4402
RPS28	-0.378854	7.08577	-4.92386	1.25e-06	5.8e-05	4.43499
YWHAZP5	0.392903	1.40382	4.92332	1.25e-06	5.81e-05	4.43245
WDR44	0.288958	2.27924	4.92276	1.25e-06	5.82e-05	4.42986
NPM1P25	-0.323054	0.905988	-4.92224	1.26e-06	5.83e-05	4.42748
ITGAV	0.453085	3.81787	4.92134	1.26e-06	5.85e-05	4.42329
FJX1	0.521359	2.34918	4.92112	1.26e-06	5.85e-05	4.42226
COX7B	-0.267824	5.19424	-4.91899	1.28e-06	5.91e-05	4.4124
NUDCD1	0.300279	2.8375	4.91827	1.28e-06	5.92e-05	4.4091
HSPA13	0.35548	2.78521	4.91688	1.29e-06	5.96e-05	4.40266
RPL10P3	-0.327851	1.16477	-4.91679	1.29e-06	5.96e-05	4.40227
AC005306.1	-0.160334	0.435416	-4.91621	1.29e-06	5.97e-05	4.39955
CDC73	0.301081	2.91574	4.91584	1.3e-06	5.97e-05	4.39784
IFT20	-0.301827	3.30972	-4.91579	1.3e-06	5.97e-05	4.39762
RABL2A	-0.176367	0.894082	-4.91568	1.3e-06	5.97e-05	4.39709
MAPK1IP1L	0.225109	3.61281	4.91548	1.3e-06	5.97e-05	4.3962
MOCS1	-0.466692	2.19434	-4.91511	1.3e-06	5.97e-05	4.39447
AL139123.1	-0.214051	0.560019	-4.91423	1.31e-06	5.99e-05	4.39039
COX4I1	-0.318314	6.17302	-4.91354	1.31e-06	6.01e-05	4.38723
AD000864.1	-0.261858	1.57358	-4.91326	1.31e-06	6.01e-05	4.38592
SRMS	-0.566125	1.71491	-4.91243	1.32e-06	6.03e-05	4.3821
TMEM259	-0.26861	5.27239	-4.90866	1.34e-06	6.14e-05	4.36466
SELENOH	-0.313976	5.14379	-4.90849	1.34e-06	6.14e-05	4.3639
SMC4	0.455059	2.74802	4.9079	1.35e-06	6.15e-05	4.36114
CHKB	-0.283924	1.51164	-4.9059	1.36e-06	6.2e-05	4.35193
RALB	0.318813	4.45628	4.90582	1.36e-06	6.2e-05	4.35156
ZFYVE19	-0.246579	3.23733	-4.90377	1.37e-06	6.25e-05	4.3421
POLL	-0.207063	2.58643	-4.90152	1.39e-06	6.32e-05	4.33173
EXT1	0.443567	3.14951	4.90021	1.4e-06	6.35e-05	4.32568
ANXA5	0.568249	5.78495	4.90019	1.4e-06	6.35e-05	4.32557
SBDS	0.256649	5.26511	4.89826	1.41e-06	6.4e-05	4.31667
BNC1	0.740628	0.820525	4.89751	1.41e-06	6.41e-05	4.31323
MACF1	0.335064	2.18831	4.89747	1.41e-06	6.41e-05	4.31305
NSUN5P2	-0.229525	0.857199	-4.89721	1.42e-06	6.42e-05	4.31184
KIRREL1	0.514162	2.00336	4.89664	1.42e-06	6.43e-05	4.30923
PTPN6	-0.325217	3.94949	-4.89616	1.42e-06	6.44e-05	4.30703
ZNF419	-0.183964	1.04197	-4.8955	1.43e-06	6.45e-05	4.30398
ECM1	0.671021	3.1193	4.89504	1.43e-06	6.46e-05	4.30183
EFEMP1	0.965649	2.74449	4.89497	1.43e-06	6.46e-05	4.30153
FBRSL1	-0.265432	2.9299	-4.89472	1.43e-06	6.46e-05	4.3004
AL450992.1	0.0487717	0.0592117	4.89381	1.44e-06	6.48e-05	4.29616
LRRC8A	0.446225	4.22983	4.89359	1.44e-06	6.48e-05	4.29516
CASQ1	-0.766497	1.5532	-4.89352	1.44e-06	6.48e-05	4.29485
LINC00941	0.395123	0.72829	4.89312	1.44e-06	6.49e-05	4.293
AL021707.6	-0.396056	2.15211	-4.89291	1.45e-06	6.49e-05	4.29205
RNY3P8	-0.507445	1.11752	-4.89232	1.45e-06	6.5e-05	4.28931
AC021148.1	-0.0557397	0.143728	-4.89127	1.46e-06	6.53e-05	4.28447
ATP11A	0.386128	1.70324	4.89055	1.46e-06	6.55e-05	4.28117
ZNF266	-0.35951	2.99713	-4.88964	1.47e-06	6.57e-05	4.277
SMC2	0.394927	2.5155	4.88943	1.47e-06	6.57e-05	4.276
SCRN2	-0.36155	3.89103	-4.8883	1.48e-06	6.6e-05	4.2708
VMAC	-0.275894	2.06029	-4.88826	1.48e-06	6.6e-05	4.27063
OR7E14P	-0.536202	2.27977	-4.88745	1.48e-06	6.62e-05	4.26691
SPRR2D	1.03912	1.40161	4.8859	1.5e-06	6.66e-05	4.2598
AC008555.7	-0.274057	0.977815	-4.88458	1.5e-06	6.7e-05	4.2537
SNRPN	-0.614023	3.48552	-4.88333	1.51e-06	6.73e-05	4.24795
AC245041.1	0.691051	1.94513	4.883	1.52e-06	6.74e-05	4.24642
PHLDA1	0.645186	3.64588	4.88153	1.53e-06	6.78e-05	4.2397
ARRDC2	-0.314499	2.99395	-4.88031	1.54e-06	6.81e-05	4.2341
AC005840.4	-0.287228	1.02868	-4.87936	1.54e-06	6.84e-05	4.22973
MMGT1	0.316602	3.14703	4.87908	1.54e-06	6.84e-05	4.22841
LENG1	-0.251278	3.14798	-4.87859	1.55e-06	6.85e-05	4.22617
BABAM1	-0.226856	4.35084	-4.87816	1.55e-06	6.86e-05	4.2242
ANKRD23	-0.12454	0.403736	-4.87537	1.57e-06	6.95e-05	4.2114
HOXB4	-0.369879	1.64144	-4.87504	1.58e-06	6.95e-05	4.20988
AC105345.1	-0.136631	0.303509	-4.87496	1.58e-06	6.95e-05	4.20952
SERBP1	0.250234	5.3396	4.8749	1.58e-06	6.95e-05	4.20925
TNK2	-0.376047	3.25325	-4.87424	1.58e-06	6.96e-05	4.20622
MEMO1P1	0.223652	1.28085	4.87381	1.58e-06	6.97e-05	4.20423
CAPN2	0.510976	4.31747	4.87207	1.6e-06	7.02e-05	4.19625
SLC25A29	-0.39129	2.48369	-4.87139	1.6e-06	7.04e-05	4.19311
ERVK3-1	-0.217202	1.935	-4.86884	1.62e-06	7.12e-05	4.18144
HAUS2	0.250374	2.56586	4.86594	1.64e-06	7.21e-05	4.16814
AC139530.2	-0.292815	1.69263	-4.8658	1.65e-06	7.21e-05	4.16749
HSD17B2	-0.78451	1.76969	-4.86546	1.65e-06	7.21e-05	4.16593
AC034223.2	0.247659	0.17312	4.86525	1.65e-06	7.21e-05	4.165
OLFML2A	0.550798	2.51418	4.86521	1.65e-06	7.21e-05	4.16479
AL136295.2	-0.191085	0.708871	-4.86496	1.65e-06	7.21e-05	4.16365
PPCDC	-0.240828	2.17973	-4.86491	1.65e-06	7.21e-05	4.16344
ZSCAN2	-0.248331	1.3568	-4.86367	1.66e-06	7.25e-05	4.15773
RTKN	0.489087	3.03051	4.86339	1.67e-06	7.25e-05	4.15647
AJ239328.1	-0.0929075	0.108094	-4.8626	1.67e-06	7.27e-05	4.15285
MMEL1	-0.322461	0.787911	-4.8625	1.67e-06	7.27e-05	4.15238
AC069307.1	-0.233195	0.823509	-4.86172	1.68e-06	7.29e-05	4.14879
STX10	-0.250981	4.8526	-4.8617	1.68e-06	7.29e-05	4.14872
NDST1	0.365475	3.14156	4.86061	1.69e-06	7.32e-05	4.14373
NCBP1	0.271119	3.16295	4.86036	1.69e-06	7.32e-05	4.14257
RNF113A	-0.262931	3.58822	-4.85958	1.7e-06	7.34e-05	4.13903
PGLYRP4	0.573606	0.814484	4.85947	1.7e-06	7.34e-05	4.13849
AC078923.1	0.192564	0.248073	4.85838	1.71e-06	7.37e-05	4.13352
RAB20	-0.484868	4.13942	-4.8583	1.71e-06	7.37e-05	4.13315
ACYP2	-0.224833	1.6092	-4.85769	1.71e-06	7.39e-05	4.13034
TMED7-TICAM2	0.0408587	0.10539	4.85686	1.72e-06	7.41e-05	4.12658
DCAF10	0.234011	2.33743	4.85596	1.73e-06	7.44e-05	4.12245
SCAMP5	-0.488146	2.0545	-4.8545	1.74e-06	7.48e-05	4.11575
EDEM1	0.363631	3.70553	4.85437	1.74e-06	7.48e-05	4.11517
MTG1	-0.271117	1.76929	-4.85384	1.74e-06	7.49e-05	4.11274
AL008582.1	-0.206861	0.525244	-4.85314	1.75e-06	7.51e-05	4.10957
UBXN6	-0.223509	4.65703	-4.85309	1.75e-06	7.51e-05	4.10932
MCRIP2	-0.368359	2.64143	-4.85234	1.76e-06	7.53e-05	4.1059
AC022415.1	-0.27275	1.19477	-4.85178	1.76e-06	7.54e-05	4.10331
BLNK	-0.489538	2.05252	-4.84951	1.78e-06	7.62e-05	4.09296
AL513477.2	-0.215642	0.698374	-4.84903	1.78e-06	7.63e-05	4.09076
REPIN1	-0.393441	4.28785	-4.84901	1.78e-06	7.63e-05	4.0907
IFT140	-0.41216	2.24569	-4.84875	1.79e-06	7.63e-05	4.08948
RACGAP1	0.432989	3.46867	4.84748	1.8e-06	7.67e-05	4.0837
AL162258.2	-0.220205	0.751334	-4.84478	1.82e-06	7.76e-05	4.07137
BCAS1	-0.930972	2.46765	-4.84442	1.82e-06	7.77e-05	4.06973
PTPN11	0.337111	3.88171	4.8438	1.83e-06	7.79e-05	4.06689
STX16-NPEPL1	-0.18591	0.451228	-4.84271	1.84e-06	7.82e-05	4.06193
AC008543.4	-0.216429	0.413753	-4.84089	1.85e-06	7.88e-05	4.05359
COL5A3	0.581983	2.13089	4.83872	1.87e-06	7.96e-05	4.0437
ZW10	0.25176	2.92644	4.83812	1.88e-06	7.97e-05	4.04096
DDX1	0.226513	4.97982	4.837	1.89e-06	8e-05	4.03585
C14orf93	-0.194001	1.94631	-4.83699	1.89e-06	8e-05	4.03582
OFD1	-0.315595	3.13352	-4.83635	1.89e-06	8.02e-05	4.03293
AL031727.1	-0.337904	1.77673	-4.83588	1.9e-06	8.03e-05	4.03077
NBEAL1	0.198555	0.568847	4.83509	1.91e-06	8.06e-05	4.02715
RHPN1	-0.653843	2.9725	-4.83468	1.91e-06	8.07e-05	4.02531
SDHAP1	-0.261005	2.06844	-4.8342	1.91e-06	8.08e-05	4.02313
CLTC	0.301672	5.21895	4.83409	1.91e-06	8.08e-05	4.02263
FCF1	0.255569	3.36585	4.83355	1.92e-06	8.08e-05	4.02014
CCDC12	-0.300573	3.64408	-4.83354	1.92e-06	8.08e-05	4.02012
LDHAP7	0.313752	0.719632	4.83292	1.92e-06	8.1e-05	4.01726
HSPA5	0.32664	7.42424	4.83282	1.93e-06	8.1e-05	4.01684
AL080243.2	-0.316564	1.40405	-4.83273	1.93e-06	8.1e-05	4.01642
AIMP2	0.301532	3.62744	4.83228	1.93e-06	8.11e-05	4.01435
HID1	-0.794243	3.35092	-4.83175	1.94e-06	8.12e-05	4.01194
PRR16	0.359719	0.938108	4.83149	1.94e-06	8.12e-05	4.01075
PSMC1	0.233835	1.9157	4.82919	1.96e-06	8.2e-05	4.0003
CCDC71L	0.515768	2.78166	4.82917	1.96e-06	8.2e-05	4.00021
ULBP3	0.312941	1.05857	4.82855	1.97e-06	8.22e-05	3.99738
F2R	0.521264	2.73065	4.82805	1.97e-06	8.23e-05	3.99513
CATSPER2	-0.207765	0.647318	-4.82628	1.99e-06	8.3e-05	3.98704
NDUFB11	-0.317687	6.2048	-4.82602	1.99e-06	8.3e-05	3.98588
AC011481.2	-0.235045	0.725428	-4.82274	2.02e-06	8.42e-05	3.97094
RIN2	0.432655	3.61093	4.82023	2.04e-06	8.52e-05	3.95955
PFDN6	-0.298542	4.15623	-4.81948	2.05e-06	8.53e-05	3.95614
GTF3C4	0.268582	2.28796	4.81947	2.05e-06	8.53e-05	3.95611
UNC119	-0.27352	3.1173	-4.81874	2.06e-06	8.56e-05	3.95278
AL021407.1	-0.277649	0.554966	-4.81665	2.08e-06	8.64e-05	3.94326
SERPINE1	0.898129	5.4826	4.81576	2.09e-06	8.66e-05	3.93925
RAP2C-AS1	0.100179	0.335467	4.8156	2.09e-06	8.66e-05	3.9385
ADAM19	0.641949	2.04962	4.81434	2.1e-06	8.71e-05	3.93279
MIR621	0.447117	3.45776	4.81261	2.12e-06	8.77e-05	3.92492
PSMD5	0.295991	3.08791	4.81185	2.13e-06	8.8e-05	3.92149
ZNF540	-0.13001	0.341524	-4.81124	2.13e-06	8.82e-05	3.91873
GBP6	0.696011	1.17762	4.81065	2.14e-06	8.84e-05	3.91604
AC005479.1	0.123664	0.256355	4.8096	2.15e-06	8.87e-05	3.91128
AP000346.2	-0.251668	0.655221	-4.80872	2.16e-06	8.9e-05	3.90728
CCT4	0.336071	5.99419	4.80865	2.16e-06	8.9e-05	3.90697
RND3	0.54129	4.16623	4.80808	2.17e-06	8.92e-05	3.90437
OLR1	0.84175	2.04666	4.80781	2.17e-06	8.92e-05	3.90314
TEX10	0.227893	2.31343	4.80673	2.18e-06	8.96e-05	3.89828
SLC25A10	-0.451072	3.42675	-4.80606	2.19e-06	8.98e-05	3.89523
KIF11	0.422183	3.12342	4.80589	2.19e-06	8.98e-05	3.89448
RHEX	-0.657402	1.2159	-4.80525	2.19e-06	9e-05	3.89157
XPO5	0.264769	3.12167	4.80521	2.19e-06	9e-05	3.89139
GPSM2	0.35378	2.00667	4.80416	2.21e-06	9.03e-05	3.88663
ZNF767P	-0.263912	2.00967	-4.80394	2.21e-06	9.04e-05	3.88564
AL132657.1	-0.176428	0.405349	-4.80355	2.21e-06	9.04e-05	3.88388
MTHFSD	-0.213229	1.96818	-4.80355	2.21e-06	9.04e-05	3.88385
TMBIM4	-0.279405	3.3019	-4.80276	2.22e-06	9.06e-05	3.88029
AL035458.1	0.209037	0.800164	4.80267	2.22e-06	9.06e-05	3.87988
ALKBH6	-0.204044	1.13034	-4.8026	2.22e-06	9.06e-05	3.87957
SCGB1B2P	-0.344432	0.99193	-4.80168	2.23e-06	9.09e-05	3.87538
AFAP1L1	0.371211	1.79671	4.80139	2.23e-06	9.1e-05	3.87408
SERPINB9	0.60308	2.4199	4.80096	2.24e-06	9.1e-05	3.87213
SLC25A13	0.282157	3.35079	4.80095	2.24e-06	9.1e-05	3.87207
STRIP2	0.334671	0.928023	4.80021	2.25e-06	9.13e-05	3.86872
ARHGAP18	0.312333	2.45128	4.79671	2.28e-06	9.27e-05	3.85288
AC040174.2	-0.28478	0.394132	-4.79641	2.29e-06	9.28e-05	3.85152
ORC1	0.383138	2.05113	4.79614	2.29e-06	9.28e-05	3.85029
POLR2H	-0.235437	4.5413	-4.79597	2.29e-06	9.28e-05	3.84954
ALG10	0.184688	0.95114	4.79593	2.29e-06	9.28e-05	3.84935
GPRC5C	-0.72913	3.05581	-4.79436	2.31e-06	9.34e-05	3.84227
NDUFA11	-0.294281	3.70279	-4.7935	2.32e-06	9.37e-05	3.83839
LAMC2	1.01813	4.13717	4.79299	2.32e-06	9.39e-05	3.83607
EIF3J-DT	-0.231182	1.53525	-4.7928	2.33e-06	9.39e-05	3.83519
DDN	0.178412	0.265568	4.79241	2.33e-06	9.4e-05	3.83342
SUZ12P1	-0.280823	1.94312	-4.79127	2.34e-06	9.44e-05	3.82831
HIGD2A	-0.311497	6.40512	-4.79053	2.35e-06	9.47e-05	3.82496
SPINK1	-1.96708	4.93162	-4.79011	2.36e-06	9.48e-05	3.82305
PALM2-AKAP2	0.0251594	0.0307046	4.78915	2.37e-06	9.51e-05	3.81869
FAAH	-0.548828	3.44865	-4.78859	2.37e-06	9.53e-05	3.8162
LUCAT1	0.219034	0.211655	4.78831	2.38e-06	9.54e-05	3.81492
PFKP	0.48734	4.91711	4.78388	2.43e-06	9.73e-05	3.79493
UCP2	-0.666576	5.28229	-4.78277	2.44e-06	9.77e-05	3.78991
NEK6	0.500182	2.46481	4.78271	2.44e-06	9.77e-05	3.78961
KCNH4	-0.236232	0.372187	-4.78239	2.44e-06	9.78e-05	3.78816
AC002066.1	0.147747	0.16439	4.78205	2.45e-06	9.78e-05	3.78665
HIVEP2	0.300919	2.36082	4.7819	2.45e-06	9.78e-05	3.78598
SNAI2	0.742975	3.56643	4.78185	2.45e-06	9.78e-05	3.78573
AC008124.1	-0.224708	1.19798	-4.78099	2.46e-06	9.81e-05	3.78186
PLA2G2F	-1.08109	2.7509	-4.77941	2.48e-06	9.88e-05	3.77474
CDK18	-0.425137	2.41815	-4.7791	2.48e-06	9.89e-05	3.77336
MRPL57	-0.26625	4.64099	-4.77891	2.48e-06	9.89e-05	3.77247
CNTD1	-0.15793	0.568779	-4.77853	2.49e-06	9.9e-05	3.77077
ZBTB22	-0.232241	3.47068	-4.77751	2.5e-06	9.94e-05	3.76618
TSGA10	-0.171918	0.692992	-4.77604	2.52e-06	0.0001	3.75956
LRMDA	-0.30188	1.19657	-4.77596	2.52e-06	0.0001	3.75918
PMS2	0.238586	1.83311	4.77497	2.53e-06	0.000100333	3.75472
UNC5CL	-0.310895	0.717045	-4.77484	2.53e-06	0.000100333	3.75413
NUP98	0.233826	3.33658	4.77422	2.54e-06	0.000100551	3.75134
RPS6KA3	0.32528	2.85841	4.77361	2.55e-06	0.000100767	3.74857
LIME1	-0.286544	1.39763	-4.77331	2.55e-06	0.000100834	3.74722
CCNB1	0.483192	4.6687	4.77094	2.58e-06	0.000101799	3.73657
ANKRD13D	-0.30172	3.59484	-4.77086	2.58e-06	0.000101799	3.73623
SAT2	-0.35205	4.5754	-4.77081	2.58e-06	0.000101799	3.73597
CSNK2B	-0.27308	4.67234	-4.77034	2.59e-06	0.000101946	3.73387
ENKD1	-0.398101	3.05866	-4.76987	2.59e-06	0.000102097	3.73174
AL357060.1	0.162651	0.388087	4.76765	2.62e-06	0.000103088	3.72178
TMCO4	-0.352187	3.32728	-4.76575	2.64e-06	0.000103937	3.7132
RPE	0.260668	3.37877	4.76425	2.66e-06	0.000104594	3.70645
ZNF443	-0.323197	1.47193	-4.76244	2.68e-06	0.000105405	3.69834
SFSWAP	-0.193019	2.66764	-4.76107	2.7e-06	0.000105965	3.69214
PIK3C2A	0.267231	2.29132	4.76087	2.7e-06	0.000105965	3.69127
AC103691.1	-0.451651	1.64906	-4.76084	2.7e-06	0.000105965	3.69115
COQ8A	-0.323311	2.72224	-4.76038	2.71e-06	0.000106119	3.68906
ATP2A3	-0.539403	2.41456	-4.75674	2.76e-06	0.000107863	3.67272
FIZ1	-0.216323	2.07833	-4.75601	2.77e-06	0.000108153	3.66945
MIB2	-0.24008	2.36227	-4.75583	2.77e-06	0.000108166	3.66863
GEMIN7	-0.257421	3.57526	-4.75452	2.79e-06	0.000108751	3.66276
POLR2J	-0.287575	5.20669	-4.7539	2.79e-06	0.000108923	3.65998
MIR762HG	-0.182083	1.021	-4.75387	2.79e-06	0.000108923	3.65985
PABPN1	-0.256978	5.07094	-4.75077	2.83e-06	0.00011042	3.6459
PNMA1	0.496569	3.42376	4.75065	2.84e-06	0.00011042	3.64536
CDKN3	0.464149	2.91508	4.74902	2.86e-06	0.000111184	3.63805
NAA38	-0.327005	4.50632	-4.74803	2.87e-06	0.000111617	3.63362
ACOXL	-0.549823	1.12172	-4.7465	2.89e-06	0.000112335	3.62678
KPNB1	0.244156	5.17037	4.74583	2.9e-06	0.00011261	3.62374
B3GNT5	0.436476	2.28167	4.745	2.91e-06	0.000112961	3.62006
CYB5A	-0.596692	3.09538	-4.74427	2.92e-06	0.000113268	3.61677
TP53TG1	-0.455326	4.7439	-4.74361	2.93e-06	0.000113537	3.6138
SNHG20	-0.27052	1.67154	-4.74317	2.94e-06	0.000113688	3.61182
POLR1A	0.234943	2.46411	4.74195	2.95e-06	0.000114251	3.6064
SEMA4D	-0.276034	1.87116	-4.738	3.01e-06	0.000116298	3.58868
ATP2B4	0.494998	3.51373	4.73728	3.02e-06	0.000116601	3.5855
LOXL2	0.557311	2.89359	4.7367	3.03e-06	0.000116822	3.58286
ZNF793	-0.236297	0.778697	-4.73657	3.03e-06	0.000116822	3.5823
FAAP100	-0.226203	3.60516	-4.73637	3.03e-06	0.000116848	3.58139
CNPY3	-0.332997	5.75234	-4.73575	3.04e-06	0.000117103	3.57861
AC124016.1	-0.156846	0.593088	-4.73467	3.06e-06	0.000117534	3.57381
TBCC	-0.252786	3.95244	-4.73465	3.06e-06	0.000117534	3.57371
PCYOX1	0.301816	4.04005	4.73373	3.07e-06	0.000117954	3.5696
SEC14L2	0.43395	1.69663	4.73339	3.07e-06	0.000118058	3.56806
PRMT5	0.349765	3.87023	4.73284	3.08e-06	0.000118273	3.56563
MMD	0.509628	2.63156	4.73161	3.1e-06	0.000118871	3.56011
ACTR2	0.287509	6	4.7313	3.1e-06	0.000118956	3.55873
SH3RF2	0.450667	1.09071	4.7306	3.11e-06	0.00011926	3.5556
GSTCD	0.222574	1.25577	4.73016	3.12e-06	0.000119417	3.55366
ARHGAP11A	0.36584	2.27335	4.7291	3.14e-06	0.000119925	3.5489
UBA7	-0.48939	3.76464	-4.72865	3.14e-06	0.000120091	3.54689
PSCA	-1.81896	6.86624	-4.72774	3.16e-06	0.000120518	3.54281
LAMTOR4	-0.32439	5.46143	-4.72724	3.16e-06	0.000120711	3.54059
ARMC5	-0.243103	2.03136	-4.72609	3.18e-06	0.000121269	3.53548
SPIRE1	0.355461	1.29928	4.72573	3.19e-06	0.00012131	3.53385
MTDH	0.324745	4.36234	4.72572	3.19e-06	0.00012131	3.53379
KRT8P12	-0.291572	2.59958	-4.72546	3.19e-06	0.000121368	3.53265
RBFOX2	0.267765	3.27114	4.72512	3.2e-06	0.000121477	3.53111
MPP6	0.296198	0.944488	4.72438	3.21e-06	0.000121806	3.52783
AC020910.4	-0.298704	1.82255	-4.72418	3.21e-06	0.000121833	3.52694
SVIL	0.475287	3.22867	4.72336	3.22e-06	0.000122216	3.52325
ASB12	-0.111466	0.237671	-4.72317	3.22e-06	0.000122233	3.52244
ATAD2	0.414338	3.09157	4.72275	3.23e-06	0.000122307	3.52053
PDCL3P4	-0.341849	1.06581	-4.72259	3.23e-06	0.000122307	3.51982
AC124276.2	0.108785	0.109898	4.72249	3.23e-06	0.000122307	3.51937
ABCF2	0.232717	4.10275	4.72243	3.24e-06	0.000122307	3.51914
SULT1A1	-0.41392	1.28296	-4.72181	3.25e-06	0.000122576	3.51636
AL158063.1	-0.168533	0.402207	-4.72118	3.25e-06	0.00012285	3.51354
USP32	0.281702	2.19482	4.72057	3.26e-06	0.000123111	3.51083
XPOT	0.338529	3.82883	4.71981	3.28e-06	0.000123323	3.50743
DLAT	0.253117	3.09614	4.71962	3.28e-06	0.000123323	3.50657
COX6A1	-0.288462	6.65759	-4.71937	3.28e-06	0.000123323	3.50545
ATP5F1E	-0.275801	5.72876	-4.71933	3.28e-06	0.000123323	3.50527
AF274858.1	-0.354973	1.49823	-4.71932	3.28e-06	0.000123323	3.50525
LYRM1	-0.29004	2.74725	-4.71929	3.28e-06	0.000123323	3.50513
GRAMD2A	0.433986	0.677971	4.71906	3.29e-06	0.00012337	3.50409
ZNF582-AS1	-0.203538	0.580704	-4.71845	3.3e-06	0.000123634	3.50136
ATP1A4	-0.523173	1.00672	-4.71804	3.3e-06	0.000123773	3.49955
RBPMS	-0.464855	2.96171	-4.71766	3.31e-06	0.000123773	3.49783
SERGEF	-0.236004	2.11149	-4.71753	3.31e-06	0.000123773	3.49729
DECR2	-0.320115	2.41554	-4.71751	3.31e-06	0.000123773	3.49718
TREM1	0.478576	0.941464	4.71746	3.31e-06	0.000123773	3.49693
PQBP1	-0.27426	5.02378	-4.71502	3.35e-06	0.000125099	3.48606
SLC39A9	0.209359	3.55876	4.71372	3.37e-06	0.000125768	3.48027
SEC24C	0.421117	2.93886	4.71351	3.37e-06	0.000125801	3.47935
CYFIP2	-0.427576	1.76135	-4.71291	3.38e-06	0.000126062	3.4767
MAP1S	-0.242021	3.33056	-4.71226	3.39e-06	0.000126315	3.47377
POLD2	0.329959	4.92732	4.71218	3.39e-06	0.000126315	3.47344
CSE1L	0.287159	5.32458	4.7119	3.4e-06	0.00012639	3.4722
CXCL8	0.959376	3.21336	4.71153	3.4e-06	0.000126523	3.47053
RPS9	-0.292402	7.38045	-4.71083	3.42e-06	0.000126783	3.46744
PKP2	0.454013	1.97611	4.71079	3.42e-06	0.000126783	3.46723
TMEM8B	-0.287269	2.02422	-4.71063	3.42e-06	0.000126789	3.46652
NRP1	0.486031	2.38275	4.71027	3.42e-06	0.00012691	3.46494
EMX2	-0.652241	1.15218	-4.7099	3.43e-06	0.000126936	3.46326
AREL1	0.238841	2.72604	4.70987	3.43e-06	0.000126936	3.46312
ZNF547	-0.194748	0.771797	-4.7097	3.43e-06	0.000126936	3.46239
AC069281.2	-0.20356	1.12758	-4.70963	3.43e-06	0.000126936	3.46209
TEAD1	0.352824	2.58916	4.70911	3.44e-06	0.000127159	3.45975
ELOVL5	0.460348	4.09102	4.70865	3.45e-06	0.000127262	3.45773
G3BP1	0.268319	3.74731	4.70864	3.45e-06	0.000127262	3.45765
MRPL53	-0.23536	2.01245	-4.70757	3.47e-06	0.000127804	3.45291
RRN3P3	-0.23369	1.30912	-4.70679	3.48e-06	0.000128178	3.44945
STX19	0.345191	0.620388	4.70521	3.51e-06	0.000129036	3.4424
DISP1	-0.22894	1.03835	-4.70316	3.54e-06	0.000130181	3.43328
UBAP2	0.235179	2.43579	4.70267	3.55e-06	0.000130388	3.43109
ERO1A	0.394726	4.26372	4.70199	3.56e-06	0.000130707	3.4281
AC009118.3	-0.239767	1.0405	-4.70145	3.57e-06	0.000130943	3.42571
HYI	-0.290567	2.29746	-4.70087	3.58e-06	0.000131206	3.42313
ZNF672	-0.230962	3.58454	-4.69979	3.59e-06	0.000131777	3.41831
MRPL43	-0.205106	4.04508	-4.69882	3.61e-06	0.000132278	3.41402
ZNF771	-0.16287	0.801704	-4.69732	3.64e-06	0.00013311	3.40735
LGALSL	0.391201	2.36948	4.69685	3.64e-06	0.000133308	3.40527
VPS26A	0.235536	4.30261	4.6951	3.67e-06	0.000134306	3.39748
ZBTB45	-0.228876	2.70708	-4.69387	3.69e-06	0.000134982	3.39201
NISCH	-0.299795	3.47417	-4.69358	3.7e-06	0.000135002	3.39075
ABHD14A	-0.393489	2.82073	-4.69354	3.7e-06	0.000135002	3.39056
MAP4K4	0.399979	3.45801	4.69132	3.74e-06	0.000136302	3.38073
BMS1	0.198056	3.2603	4.68917	3.78e-06	0.000137574	3.37118
TUBA1C	0.381567	5.12546	4.68751	3.81e-06	0.000138515	3.3638
ZNF84	-0.286923	1.96648	-4.6874	3.81e-06	0.000138515	3.36334
ELMSAN1	0.234632	1.7896	4.68648	3.82e-06	0.000138976	3.35923
SLC29A3	-0.505196	3.28962	-4.68639	3.83e-06	0.000138976	3.35885
NUP58	0.26356	2.50191	4.68538	3.84e-06	0.000139532	3.35438
ZNF460-AS1	-0.199868	0.755653	-4.68477	3.85e-06	0.000139832	3.35167
PPM1N	-0.557537	1.41062	-4.68449	3.86e-06	0.000139872	3.35043
ATG16L2	-0.375773	1.93719	-4.68441	3.86e-06	0.000139872	3.3501
KRT81	0.863698	1.05729	4.68368	3.87e-06	0.000140251	3.34686
REV3L	0.25696	1.23995	4.68343	3.88e-06	0.000140319	3.34575
SOCS6	0.296505	2.28049	4.68292	3.89e-06	0.000140555	3.34349
SBSN	1.1086	1.713	4.68271	3.89e-06	0.000140594	3.34257
DPY19L3	-0.277634	1.85235	-4.68141	3.91e-06	0.00014124	3.3368
AC007365.1	0.109716	0.135548	4.68139	3.91e-06	0.00014124	3.33672
AC079414.3	-0.26756	1.09646	-4.68129	3.92e-06	0.00014124	3.33624
SLC7A11	0.610991	1.05006	4.68083	3.92e-06	0.000141442	3.33423
GNB4	0.464927	1.78673	4.68005	3.94e-06	0.000141855	3.33079
BATF	-0.607207	4.25397	-4.67969	3.95e-06	0.000141997	3.32919
AC026362.1	-0.0511691	0.173264	-4.67866	3.96e-06	0.000142578	3.32463
ZNF862	-0.288975	1.3706	-4.67631	4.01e-06	0.000144042	3.31421
ZNF770	0.431178	1.96404	4.67582	4.02e-06	0.000144245	3.31207
MIR6859-1	-0.29985	0.67153	-4.67571	4.02e-06	0.000144245	3.31157
TMEM106B	0.254122	2.1995	4.67469	4.04e-06	0.000144801	3.30705
MYH9	0.322224	6.98045	4.67459	4.04e-06	0.000144801	3.3066
C9orf16	-0.398899	5.38707	-4.67437	4.04e-06	0.000144847	3.30565
SMIM13	0.263407	2.2438	4.67347	4.06e-06	0.000145355	3.30165
EVI5	0.206621	1.73716	4.67309	4.07e-06	0.000145508	3.30001
FAP	0.52076	1.32668	4.67253	4.08e-06	0.000145787	3.29753
DUSP3	0.287564	3.79123	4.67047	4.12e-06	0.000147087	3.28839
ATP5IF1	-0.265131	5.63907	-4.6703	4.12e-06	0.0001471	3.28766
AL117379.1	-0.306095	1.30681	-4.6695	4.14e-06	0.000147547	3.28412
RAB31	0.595283	3.76531	4.66934	4.14e-06	0.000147555	3.28343
AL358472.2	-0.1967	1.04636	-4.66772	4.17e-06	0.000148515	3.27625
CCDC57	-0.258823	1.78147	-4.66765	4.17e-06	0.000148515	3.27594
AP000254.1	-0.301377	1.80457	-4.66731	4.18e-06	0.00014865	3.27443
ZNF182	-0.231303	1.75465	-4.6671	4.18e-06	0.000148695	3.27351
RGP1	0.309522	2.38934	4.66638	4.2e-06	0.000148911	3.27034
SMG9	-0.241086	2.8677	-4.66637	4.2e-06	0.000148911	3.27029
RNASET2	-0.450247	3.13184	-4.66635	4.2e-06	0.000148911	3.2702
SETD7	0.28442	2.3029	4.66423	4.24e-06	0.000150274	3.26085
AFAP1	0.343184	1.96714	4.66348	4.25e-06	0.000150696	3.25753
KRTAP5-8	-0.236316	0.339284	-4.662	4.28e-06	0.000151621	3.25103
STK38L	0.34255	2.79953	4.66088	4.3e-06	0.000152308	3.24607
CDKL2	0.137121	0.243664	4.65928	4.33e-06	0.000153329	3.23904
STXBP2	-0.303271	3.87543	-4.6588	4.34e-06	0.000153569	3.23691
S100A7	1.72202	3.18814	4.65807	4.36e-06	0.000153984	3.2337
SEC24A	0.257668	2.33853	4.65765	4.37e-06	0.000154178	3.23185
AC073896.2	-0.223643	1.41816	-4.65704	4.38e-06	0.000154509	3.22917
NDE1	0.347338	2.31435	4.65662	4.39e-06	0.000154711	3.22729
LRRFIP2	0.202067	2.30317	4.65642	4.39e-06	0.000154751	3.22641
FOXM1	0.524553	3.50339	4.65539	4.41e-06	0.000155385	3.22186
ZNF365	0.326641	0.558246	4.65202	4.48e-06	0.000157606	3.20703
ZKSCAN2-DT	-0.230207	0.843721	-4.65199	4.48e-06	0.000157606	3.20688
ZNF747	-0.224957	2.08739	-4.65187	4.49e-06	0.000157606	3.20639
AL603750.1	-0.343833	1.47103	-4.65078	4.51e-06	0.000158299	3.20156
FOSL1	0.726174	3.78915	4.65043	4.52e-06	0.000158448	3.20003
DANCR	-0.497542	4.32321	-4.65019	4.52e-06	0.000158514	3.199
DEPDC7	0.402963	0.908649	4.64976	4.53e-06	0.000158729	3.19708
BORCS6	-0.221057	2.351	-4.64904	4.54e-06	0.000159152	3.1939
NCL	0.28323	6.38941	4.64876	4.55e-06	0.000159251	3.19268
RTCA-AS1	-0.238898	1.06841	-4.64808	4.56e-06	0.000159644	3.18969
ZNF3	-0.252551	2.84225	-4.64786	4.57e-06	0.000159702	3.18872
RNF7	-0.193249	4.71385	-4.64664	4.59e-06	0.000160493	3.18336
SRRM5	-0.184475	0.639144	-4.64584	4.61e-06	0.000160888	3.17987
GLS	0.34975	2.80274	4.64582	4.61e-06	0.000160888	3.17976
NEBL	0.46823	1.69758	4.64481	4.63e-06	0.000161441	3.17532
ARSI	0.568938	1.33775	4.64479	4.63e-06	0.000161441	3.17523
AC093904.2	0.220432	0.351359	4.644	4.65e-06	0.000161826	3.17174
FMN1	0.17178	0.350024	4.64399	4.65e-06	0.000161826	3.1717
ZFP14	-0.232092	1.17759	-4.6436	4.66e-06	0.000162009	3.16999
AC138230.1	-0.148933	0.483747	-4.64317	4.67e-06	0.000162131	3.16809
MUTYH	-0.255646	2.52384	-4.64312	4.67e-06	0.000162131	3.16788
INHBA-AS1	0.0303175	0.0414613	4.64301	4.67e-06	0.000162131	3.16741
AL139287.1	-0.353321	3.09335	-4.64238	4.69e-06	0.000162497	3.16463
TCAIM	-0.259213	2.18833	-4.64205	4.69e-06	0.000162614	3.16316
CEBPZ	0.231993	3.86932	4.64194	4.69e-06	0.000162614	3.1627
LINC01582	0.0484163	0.0213686	4.64167	4.7e-06	0.00016271	3.16151
MYLIP	-0.524273	3.60473	-4.64111	4.71e-06	0.000162938	3.15904
LIN37	-0.189545	1.40277	-4.64101	4.71e-06	0.000162938	3.15862
PIGZ	-0.498958	2.03147	-4.64077	4.72e-06	0.000162938	3.15757
AC142472.1	-0.194192	0.922583	-4.64068	4.72e-06	0.000162938	3.15718
TBC1D14	0.326093	1.65903	4.64066	4.72e-06	0.000162938	3.15708
PI4KB	-0.263953	4.27189	-4.63942	4.75e-06	0.000163759	3.15165
TMEM175	-0.290091	2.82984	-4.63797	4.78e-06	0.000164747	3.14527
CCDC24	-0.356615	2.52625	-4.63746	4.79e-06	0.000165024	3.14305
LAMA3	0.844324	2.10082	4.63717	4.8e-06	0.000165141	3.14175
LMBR1	0.216948	2.13712	4.63697	4.8e-06	0.000165186	3.14087
AL109947.1	-0.0832609	0.131772	-4.63668	4.81e-06	0.000165298	3.13961
ULK3	-0.304585	3.75552	-4.636	4.82e-06	0.000165606	3.13661
MHENCR	-0.376823	2.92107	-4.636	4.82e-06	0.000165606	3.1366
FSTL3	0.721018	3.38541	4.63573	4.83e-06	0.000165699	3.13545
CHMP4B	-0.273036	7.38677	-4.63483	4.85e-06	0.000166273	3.13149
MXD3	-0.304966	1.72993	-4.6347	4.85e-06	0.000166273	3.13091
HSD11B1L	-0.323375	1.66568	-4.63427	4.86e-06	0.000166493	3.12903
AL604028.1	-0.23058	2.08659	-4.63248	4.9e-06	0.000167756	3.12118
SPRR2G	0.705847	0.596226	4.63232	4.91e-06	0.000167776	3.12046
PPP1R10	-0.223869	4.38974	-4.63143	4.93e-06	0.000168349	3.11658
AC010719.1	-0.335122	0.86143	-4.63043	4.95e-06	0.000169017	3.11219
ZNF219	-0.347082	2.84541	-4.62992	4.96e-06	0.000169304	3.10995
TIMM17B	-0.28103	4.47658	-4.62826	5e-06	0.000170477	3.10268
MTMR9LP	-0.299307	1.40699	-4.62811	5e-06	0.000170477	3.102
GFOD1-AS1	0.0955258	0.127606	4.62799	5e-06	0.000170477	3.10149
ZNF620	-0.242953	0.974906	-4.62772	5.01e-06	0.000170477	3.10033
DIO2	0.513795	1.19241	4.62772	5.01e-06	0.000170477	3.10029
UAP1L1	0.348416	1.80588	4.62628	5.04e-06	0.000171383	3.094
GLI4	-0.352858	2.71559	-4.62614	5.05e-06	0.000171383	3.09337
FABP6	-0.866306	2.63258	-4.62611	5.05e-06	0.000171383	3.09325
TLNRD1	-0.251707	3.26216	-4.626	5.05e-06	0.000171383	3.09278
AL731567.1	-0.519887	1.58098	-4.62581	5.06e-06	0.000171424	3.09195
DPP4	0.506234	1.03171	4.62555	5.06e-06	0.00017152	3.09081
AC080129.2	-0.240792	0.638371	-4.62487	5.08e-06	0.000171868	3.0878
NPTXR	-0.702584	2.07685	-4.62483	5.08e-06	0.000171868	3.08765
AC114284.1	0.0857798	0.155342	4.62397	5.1e-06	0.00017243	3.08389
LINC02604	-0.369216	2.05414	-4.62384	5.1e-06	0.00017243	3.08332
WNK1	0.310751	3.45069	4.62261	5.13e-06	0.000173291	3.07794
CENPE	0.333814	1.78559	4.62217	5.14e-06	0.000173538	3.07598
FAM120A	0.232974	4.77612	4.62144	5.16e-06	0.000174001	3.07282
GGA1	-0.233209	3.09056	-4.62036	5.18e-06	0.000174692	3.06806
MRPL20	-0.226515	4.91022	-4.62027	5.19e-06	0.000174692	3.06767
TBC1D3L	-0.273967	0.713569	-4.62016	5.19e-06	0.000174692	3.06722
COMMD6	-0.280422	4.65365	-4.61966	5.2e-06	0.000174941	3.06502
PGAM1	0.381733	4.23701	4.61958	5.2e-06	0.000174941	3.06465
APOL4	-0.704338	3.23747	-4.61898	5.22e-06	0.000175263	3.06203
B3GNT7	0.47855	1.55918	4.6189	5.22e-06	0.000175263	3.06169
AC009065.8	-0.253044	1.28286	-4.61854	5.23e-06	0.000175405	3.0601
SPTY2D1	0.235676	2.41544	4.61845	5.23e-06	0.000175405	3.05971
NFKBIL1	-0.275077	3.96763	-4.61765	5.25e-06	0.000175931	3.05625
SLC7A1	0.472915	3.16207	4.61744	5.25e-06	0.00017599	3.05533
RNF166	-0.247912	2.29813	-4.61695	5.26e-06	0.000176279	3.05315
SSH3	-0.581531	5.24235	-4.61663	5.27e-06	0.00017637	3.05177
RPL32	-0.369403	8.04275	-4.61644	5.28e-06	0.00017637	3.05094
FAM91A3P	0.014124	0.0229025	4.61642	5.28e-06	0.00017637	3.05086
TNFRSF14-AS1	-0.344772	0.874079	-4.61585	5.29e-06	0.00017672	3.04837
GRIK2	0.102261	0.125703	4.61565	5.3e-06	0.000176778	3.04746
BRMS1L	0.237591	1.62254	4.61501	5.31e-06	0.000177182	3.04468
MAP3K20-AS1	0.109568	0.166802	4.61407	5.33e-06	0.000177833	3.04057
AC022916.1	-0.161175	0.715794	-4.61316	5.36e-06	0.000178458	3.03662
BICD1	0.211243	0.973876	4.613	5.36e-06	0.000178483	3.03589
PGPEP1	-0.362267	2.27305	-4.61257	5.37e-06	0.000178719	3.03402
SMAD6	-0.405627	1.22234	-4.61225	5.38e-06	0.000178869	3.03263
SCNN1G	-0.96077	2.58693	-4.61169	5.39e-06	0.000179218	3.03017
SMURF1	0.247761	3.35041	4.61117	5.41e-06	0.000179426	3.02792
SCAT1	0.334208	0.566362	4.61116	5.41e-06	0.000179426	3.02787
CDV3	0.304424	5.01893	4.61036	5.43e-06	0.000179973	3.02436
VSTM5	0.181128	0.308955	4.60998	5.43e-06	0.000180175	3.0227
BRICD5	-0.340718	1.63195	-4.60975	5.44e-06	0.000180254	3.02169
PGBD2	-0.230767	1.76177	-4.60847	5.47e-06	0.000181193	3.01612
RPL23A	-0.284285	7.56022	-4.60803	5.48e-06	0.000181447	3.01419
RHOT2	-0.270323	4.22211	-4.6078	5.49e-06	0.000181523	3.01319
AC011445.2	-0.395385	1.37946	-4.60679	5.51e-06	0.000182252	3.00877
C6orf47	-0.213933	4.06878	-4.6056	5.54e-06	0.00018313	3.00358
AL031864.1	-0.129849	0.212565	-4.60476	5.57e-06	0.000183706	2.99992
FRAT2	-0.320405	3.241	-4.60462	5.57e-06	0.000183706	2.99933
L2HGDH	0.227578	1.34206	4.6045	5.57e-06	0.000183706	2.99881
AL356740.1	-0.28592	0.542494	-4.60433	5.58e-06	0.000183738	2.99805
PDGFC	0.442476	1.61662	4.60262	5.62e-06	0.00018506	2.9906
MED16	-0.243545	4.059	-4.60194	5.64e-06	0.000185524	2.98762
MRPL24	-0.296825	5.36466	-4.60177	5.64e-06	0.000185549	2.9869
PAOX	-0.264327	2.16121	-4.60041	5.68e-06	0.000186589	2.98096
SCAMP1-AS1	-0.223113	2.05889	-4.59935	5.7e-06	0.000187376	2.97635
PYGO2	-0.242809	4.56724	-4.59865	5.72e-06	0.000187859	2.9733
EMX2OS	-0.371083	0.610529	-4.5984	5.73e-06	0.000187965	2.97218
AC104113.1	-0.183208	0.838536	-4.59813	5.74e-06	0.000188074	2.97103
P2RY6	0.520997	1.52353	4.59756	5.75e-06	0.000188454	2.96852
ETF1	0.248169	4.60116	4.59687	5.77e-06	0.000188925	2.96554
OXLD1	-0.309331	4.28093	-4.59635	5.78e-06	0.000189257	2.96327
NUBPL	0.156504	1.18948	4.59576	5.8e-06	0.000189652	2.9607
AC013489.3	-0.0681549	0.174588	-4.59393	5.85e-06	0.000191124	2.95272
CREB3L4	-0.393441	2.95351	-4.59348	5.86e-06	0.000191396	2.95077
ZNF528-AS1	-0.388195	1.43987	-4.59263	5.88e-06	0.000191942	2.94708
CRKL	0.325115	4.27363	4.59259	5.88e-06	0.000191942	2.94688
CHST3	0.450716	1.74084	4.59167	5.91e-06	0.000192622	2.94291
RNF216P1	0.199665	1.87216	4.59154	5.91e-06	0.000192622	2.94233
SAP25	-0.147631	0.305888	-4.59034	5.94e-06	0.000193563	2.93709
ZNF404	-0.248993	1.09951	-4.58814	6e-06	0.000195387	2.92754
AL023284.4	-0.544744	2.80393	-4.58543	6.08e-06	0.000197693	2.91573
JMJD1C	0.287318	2.17954	4.58525	6.08e-06	0.000197726	2.91499
CUL9	-0.227153	2.0904	-4.58501	6.09e-06	0.000197828	2.91392
RAD23B	0.286867	5.39362	4.58445	6.1e-06	0.000198141	2.91152
AC104463.2	-0.282277	0.882141	-4.58437	6.11e-06	0.000198141	2.91114
S100A10	0.754803	7.24283	4.58426	6.11e-06	0.000198141	2.91067
FAM167B	-0.378273	2.63381	-4.582	6.17e-06	0.000200066	2.90084
MGAT1	-0.406343	5.56118	-4.58123	6.19e-06	0.000200645	2.8975
AC024560.1	-0.167816	0.265295	-4.58023	6.22e-06	0.000201429	2.89319
SETBP1	0.284375	0.811774	4.57981	6.23e-06	0.000201693	2.89136
MTHFD1	0.27311	3.27555	4.57911	6.25e-06	0.000202214	2.88831
MRPS25	-0.319253	3.4507	-4.57861	6.27e-06	0.000202437	2.88612
FCHSD1	-0.275149	2.58486	-4.5786	6.27e-06	0.000202437	2.8861
MIR6784	-0.459527	0.921733	-4.57832	6.28e-06	0.000202463	2.88488
LOX	0.573523	2.09508	4.57831	6.28e-06	0.000202463	2.88482
SLC19A3	0.226333	0.282194	4.57729	6.31e-06	0.000203278	2.8804
ZNF19	-0.0907105	0.388523	-4.57713	6.31e-06	0.000203306	2.8797
AGAP3	-0.292069	3.64908	-4.57663	6.33e-06	0.000203645	2.87753
VRK2	0.282659	2.42823	4.57635	6.33e-06	0.000203719	2.87633
LINC02657	0.687168	1.57994	4.57628	6.34e-06	0.000203719	2.87603
AP001000.1	0.350261	2.45917	4.57598	6.34e-06	0.000203877	2.87471
MTMR14	-0.240642	3.3232	-4.57579	6.35e-06	0.000203924	2.87392
AC016773.1	-0.304081	1.2352	-4.5756	6.35e-06	0.000203977	2.8731
CERS6	0.311051	2.25735	4.57546	6.36e-06	0.000203988	2.87247
GOLIM4	0.366335	3.36468	4.57492	6.37e-06	0.000204365	2.87013
CAPN10	-0.204101	1.89907	-4.57352	6.42e-06	0.000205546	2.86405
CHSY3	0.244638	0.674356	4.57335	6.42e-06	0.000205575	2.86334
ASCC2	-0.395402	4.78029	-4.57242	6.45e-06	0.000206321	2.8593
CYP4B1	-1.26906	4.07378	-4.57035	6.51e-06	0.000208147	2.85031
FYB1	0.614376	1.71688	4.56892	6.55e-06	0.000209322	2.84413
TGM1	0.734111	1.3151	4.56884	6.55e-06	0.000209322	2.84378
TRIM38	-0.268919	2.60474	-4.56715	6.6e-06	0.000210803	2.83647
TMX1	0.279701	3.74457	4.56646	6.62e-06	0.000211338	2.83348
AL355385.1	-0.21305	0.615608	-4.56613	6.63e-06	0.000211526	2.83206
AL360181.4	-0.172178	0.31371	-4.56527	6.66e-06	0.000212137	2.8283
DLEU1	0.164904	0.558195	4.56523	6.66e-06	0.000212137	2.82816
AC007490.1	-0.471249	0.840265	-4.5636	6.71e-06	0.000213587	2.82108
TPD52L1	0.487358	2.10493	4.56185	6.76e-06	0.000215157	2.81351
SCFD1	0.181724	2.95976	4.56112	6.79e-06	0.000215742	2.81035
AC022007.1	-0.271767	1.29855	-4.56055	6.8e-06	0.000216085	2.80791
AL139095.3	0.175204	0.180053	4.5605	6.81e-06	0.000216085	2.80769
SMAD1	0.282958	1.59228	4.56012	6.82e-06	0.000216336	2.80602
TEKT5	-0.377891	0.686534	-4.55978	6.83e-06	0.000216447	2.80455
CYP4Z1	-0.231071	0.347062	-4.55974	6.83e-06	0.000216447	2.80439
SWSAP1	-0.255273	1.9498	-4.55855	6.87e-06	0.00021749	2.79923
TRABD	-0.294559	4.5981	-4.55841	6.87e-06	0.000217491	2.79866
LDHA	0.491471	6.33909	4.55806	6.88e-06	0.000217706	2.79715
C1GALT1	0.287782	2.26404	4.5567	6.92e-06	0.000218838	2.79126
DUSP2	-0.739719	3.39892	-4.55666	6.92e-06	0.000218838	2.79106
AC107884.1	-0.0913494	0.224459	-4.55481	6.98e-06	0.000220537	2.7831
FAM91A1	0.284549	3.27646	4.55347	7.02e-06	0.00022175	2.77729
CCBE1	0.343557	0.414809	4.55323	7.03e-06	0.000221863	2.77624
AF201337.1	0.210382	0.869783	4.55209	7.07e-06	0.000222877	2.77132
MPP3	0.257094	0.900315	4.55193	7.07e-06	0.000222902	2.77065
AP001160.1	-0.212188	0.914528	-4.55174	7.08e-06	0.000222959	2.76984
ATP5F1AP3	-0.0274839	0.0612811	-4.5507	7.11e-06	0.000223882	2.76533
LINC02633	-0.22329	0.302259	-4.55003	7.14e-06	0.000224412	2.76243
ALMS1-IT1	0.171286	0.516221	4.54992	7.14e-06	0.000224412	2.76195
ANKIB1	0.257722	3.16014	4.54815	7.2e-06	0.000226065	2.75434
COA6-AS1	-0.312316	1.79965	-4.54803	7.2e-06	0.000226065	2.75381
PRXL2C	0.376342	1.97095	4.54782	7.21e-06	0.000226147	2.7529
AKAP2	0.0393797	0.0559221	4.54758	7.21e-06	0.000226255	2.75188
AC034223.1	0.113652	0.0775057	4.54649	7.25e-06	0.000227241	2.74717
TLK1	0.235077	2.59641	4.5454	7.29e-06	0.000228229	2.74247
AL691482.3	-0.740647	2.38113	-4.54389	7.34e-06	0.000229572	2.73597
PODXL2	-0.74344	4.02349	-4.54384	7.34e-06	0.000229572	2.73574
AC104758.2	-0.21218	0.655115	-4.54359	7.35e-06	0.000229696	2.73466
ZNF546	-0.12947	0.442698	-4.54285	7.37e-06	0.000230325	2.73149
GDF7	-0.324091	0.740033	-4.54188	7.4e-06	0.000231157	2.72728
AL591135.1	0.0251941	0.0690417	4.54179	7.41e-06	0.000231157	2.72693
PLOD1	0.36452	5.08355	4.541	7.43e-06	0.000231771	2.72353
LYN	0.458399	2.90681	4.54095	7.43e-06	0.000231771	2.72328
CTSH	-0.651355	5.69764	-4.53999	7.47e-06	0.000232545	2.71917
PCED1A	-0.358158	4.12483	-4.53995	7.47e-06	0.000232545	2.71898
DUS1L	-0.280383	4.71489	-4.53859	7.51e-06	0.000233821	2.71311
MYO9A	0.1976	1.13706	4.53848	7.52e-06	0.000233821	2.71264
GNG12	0.40834	4.14922	4.53826	7.52e-06	0.000233914	2.7117
DEPDC1B	0.349983	1.94139	4.53759	7.55e-06	0.000234481	2.70883
AC009126.1	-0.117724	0.573705	-4.53737	7.55e-06	0.000234577	2.70788
AC135050.6	-0.316594	3.42427	-4.53722	7.56e-06	0.000234602	2.70723
AC079174.2	-0.136484	0.463447	-4.53677	7.57e-06	0.00023494	2.7053
TFPI	0.461225	1.65663	4.5365	7.58e-06	0.000235091	2.70413
ACBD3	0.267341	4.14287	4.53533	7.62e-06	0.000236196	2.69909
AC006971.1	0.015475	0.0315327	4.534	7.67e-06	0.000237404	2.69339
AMT	-0.425145	1.77825	-4.53394	7.67e-06	0.000237404	2.69311
TMEM86B	-0.255086	1.26552	-4.53364	7.68e-06	0.000237587	2.69182
EPGN	0.471616	0.655668	4.5334	7.69e-06	0.000237702	2.69081
ZNF436-AS1	-0.330594	1.43392	-4.53259	7.72e-06	0.000238441	2.68729
MTERF2	-0.238224	1.74868	-4.53212	7.74e-06	0.000238709	2.68527
ZNF321P	-0.402556	1.56183	-4.53208	7.74e-06	0.000238709	2.68511
AC009061.2	-0.172592	0.790878	-4.5318	7.75e-06	0.000238876	2.68389
PRC1	0.422771	3.36581	4.53145	7.76e-06	0.000239111	2.6824
RAPH1	0.137003	0.402137	4.53068	7.79e-06	0.000239683	2.67911
SLC7A5	0.717654	5.0028	4.53066	7.79e-06	0.000239683	2.67902
LZTS2	-0.257075	3.97931	-4.52992	7.81e-06	0.000240342	2.67581
SUSD6	0.35481	3.25213	4.5298	7.82e-06	0.000240342	2.6753
MRPS26	-0.298677	5.96913	-4.52915	7.84e-06	0.000240907	2.67251
TSPOAP1	-0.330605	0.881479	-4.52877	7.85e-06	0.000241181	2.67087
AL121772.1	0.171608	0.314958	4.52818	7.87e-06	0.000241673	2.66837
ERRFI1	0.540709	4.52784	4.52665	7.93e-06	0.000243203	2.6618
COL7A1	0.761964	3.79943	4.52592	7.95e-06	0.000243871	2.65863
NME3	-0.462546	4.648	-4.52566	7.96e-06	0.000244012	2.65753
FNDC3B	0.342838	3.16038	4.52396	8.02e-06	0.000245749	2.65021
PPP1R35	-0.318076	4.28615	-4.52338	8.05e-06	0.00024624	2.64775
BORCS8	-0.198704	1.95817	-4.52312	8.05e-06	0.000246391	2.64662
WBP1	-0.349561	2.8697	-4.52097	8.13e-06	0.000248599	2.63741
LINC00630	0.136983	0.513098	4.52088	8.14e-06	0.000248599	2.637
NDUFS5	-0.335962	8.23492	-4.52012	8.16e-06	0.000249305	2.63375
SDHAF1	-0.258516	3.86156	-4.51969	8.18e-06	0.000249646	2.6319
CENPT	-0.288839	3.12946	-4.51898	8.21e-06	0.000250301	2.62885
LSM12P1	0.251728	1.6425	4.5186	8.22e-06	0.000250588	2.62721
GATAD2A	0.188903	3.84065	4.5174	8.26e-06	0.000251792	2.62209
KLHL7	0.20677	2.34414	4.51647	8.3e-06	0.000252706	2.61808
AL136295.7	-0.240815	1.63474	-4.51633	8.3e-06	0.000252717	2.6175
AC009226.1	0.0605473	0.15562	4.51597	8.32e-06	0.000252981	2.61595
RPL6P27	-0.384356	3.17496	-4.51547	8.34e-06	0.000253408	2.6138
AC010618.1	-0.283358	4.62486	-4.51497	8.35e-06	0.000253713	2.61168
CEACAM19	0.33952	0.915324	4.51492	8.36e-06	0.000253713	2.61145
SLC38A9	0.191376	1.23676	4.51482	8.36e-06	0.000253713	2.61102
NSUN6	-0.325296	2.39753	-4.51422	8.38e-06	0.000254253	2.60845
AC011477.3	-0.376572	1.42765	-4.51319	8.42e-06	0.000255292	2.60401
SRCIN1	-0.425187	1.24087	-4.51173	8.48e-06	0.000256664	2.59776
KLHL26	-0.19007	1.73934	-4.51158	8.48e-06	0.000256664	2.59715
AC023509.3	-0.292798	1.356	-4.51149	8.49e-06	0.000256664	2.59677
ENGASE	-0.459887	3.20296	-4.51148	8.49e-06	0.000256664	2.59673
MCM8	0.290195	1.81956	4.51016	8.54e-06	0.000258044	2.59107
AC003070.1	-0.461184	1.81946	-4.5097	8.55e-06	0.00025844	2.58907
RPS15	-0.335162	7.30495	-4.50859	8.6e-06	0.00025958	2.58432
FOXK1	0.309621	2.15107	4.50825	8.61e-06	0.000259706	2.58288
ZNF345	-0.210038	0.981801	-4.50823	8.61e-06	0.000259706	2.58278
TRIO	0.320446	2.45632	4.50788	8.62e-06	0.000259963	2.5813
PSMB4	-0.27739	7.0645	-4.50746	8.64e-06	0.000260293	2.5795
TDH	-0.332176	0.654433	-4.50735	8.65e-06	0.000260293	2.57901
LARGE1	-0.354596	1.53048	-4.50665	8.67e-06	0.000260961	2.57602
PCMT1	0.253566	4.31532	4.50633	8.68e-06	0.000261087	2.57468
CORO1B	-0.274513	4.84893	-4.50629	8.69e-06	0.000261087	2.57449
SEC24B-AS1	-0.100535	0.41174	-4.50583	8.7e-06	0.000261474	2.57254
RFNG	-0.260941	4.00772	-4.50489	8.74e-06	0.000262435	2.5685
SPHK1	0.677123	2.53705	4.50408	8.77e-06	0.000263243	2.56502
IQCH-AS1	-0.182393	0.935925	-4.50391	8.78e-06	0.000263288	2.56433
OST4	-0.233173	7.71073	-4.5035	8.8e-06	0.000263631	2.56255
MFSD4B	0.20317	1.00463	4.50328	8.8e-06	0.000263741	2.56161
EPRS	0.274142	4.52749	4.5031	8.81e-06	0.000263803	2.56085
MICOS10	-0.187619	2.94449	-4.50288	8.82e-06	0.000263916	2.55991
RAPGEF5	0.294903	1.13311	4.5026	8.83e-06	0.0002641	2.55871
ZNF697	0.283626	1.49921	4.50113	8.89e-06	0.000265699	2.55241
TNFRSF10A	0.356574	2.31346	4.50082	8.9e-06	0.000265764	2.55109
CALD1	0.632905	3.95589	4.50074	8.91e-06	0.000265764	2.55076
AL450326.2	-0.0494859	0.0647075	-4.50038	8.92e-06	0.000265764	2.54922
AC107308.1	0.240149	0.235395	4.50037	8.92e-06	0.000265764	2.54919
GPANK1	-0.250723	2.77281	-4.50036	8.92e-06	0.000265764	2.54914
SUOX	-0.364519	2.86501	-4.50032	8.92e-06	0.000265764	2.54898
AKR1A1	-0.250244	5.49169	-4.50015	8.93e-06	0.000265823	2.54823
CDC42EP5	-0.746992	4.03122	-4.49962	8.95e-06	0.000266299	2.54599
AC106886.4	-0.0935317	0.339174	-4.49949	8.96e-06	0.000266309	2.54543
NDUFAF3	-0.304541	4.54059	-4.49826	9e-06	0.000267636	2.54015
GREB1L	0.192803	0.240353	4.4979	9.02e-06	0.00026791	2.53864
BIRC6	0.267083	2.43004	4.49645	9.08e-06	0.000269509	2.53243
NUP155	0.319703	2.69792	4.496	9.1e-06	0.000269887	2.53053
SPOCD1	-0.679645	1.8131	-4.49589	9.1e-06	0.000269887	2.53003
SNX31	-1.13745	2.92971	-4.49517	9.13e-06	0.000270602	2.52697
GKAP1	-0.247097	1.00372	-4.49462	9.15e-06	0.00027112	2.52462
MTMR2	0.219586	2.96374	4.49399	9.18e-06	0.000271736	2.52192
HACD4	0.293664	1.06957	4.49381	9.19e-06	0.000271799	2.52117
NT5E	0.706222	2.27159	4.4933	9.21e-06	0.000272269	2.51899
VPS28	-0.290503	5.21822	-4.49305	9.22e-06	0.000272427	2.51791
HMMR	0.40314	2.47243	4.49219	9.25e-06	0.000273324	2.51424
AREG	0.973707	3.0277	4.49192	9.26e-06	0.000273505	2.51309
NBR2	-0.322757	2.16223	-4.49133	9.29e-06	0.000274073	2.51058
CCS	-0.276426	4.00583	-4.49002	9.34e-06	0.000275524	2.50501
CCNO	-0.477342	2.46711	-4.48967	9.36e-06	0.000275803	2.50352
GLIPR1	0.429248	1.72829	4.48859	9.4e-06	0.00027699	2.49889
NCAPG2	0.363833	2.50218	4.48841	9.41e-06	0.000277053	2.49815
MIR6812	-0.225101	0.479475	-4.48794	9.43e-06	0.000277251	2.49615
DHPS	-0.226033	4.27328	-4.48784	9.43e-06	0.000277251	2.49571
AL445471.1	0.095318	0.116316	4.48778	9.44e-06	0.000277251	2.49547
RBMS2	0.270426	2.18322	4.48776	9.44e-06	0.000277251	2.49536
AC005332.3	-0.324609	2.33764	-4.48717	9.46e-06	0.000277829	2.49285
TATDN3	-0.165969	1.91199	-4.48438	9.58e-06	0.000281078	2.48095
EDNRA	0.422363	1.62262	4.48432	9.58e-06	0.000281078	2.48071
HAGH	-0.225288	2.6813	-4.48407	9.59e-06	0.000281238	2.47964
SPTSSA	0.388089	4.38239	4.48202	9.68e-06	0.000283663	2.47092
RFC3	0.366671	2.77414	4.48153	9.7e-06	0.000284134	2.46881
RAB3D	0.425221	2.7218	4.4805	9.75e-06	0.000285285	2.46443
FAU	-0.284589	7.72636	-4.48	9.77e-06	0.000285767	2.4623
LINC01578	-0.255233	3.23786	-4.4792	9.8e-06	0.00028663	2.4589
AC024075.2	-0.301171	1.99337	-4.47904	9.81e-06	0.000286669	2.45825
NDUFAF1	-0.219767	3.20801	-4.47799	9.86e-06	0.000287856	2.45378
AP003392.6	-0.144398	0.483655	-4.47784	9.86e-06	0.000287897	2.45312
DMPK	-0.321626	3.15666	-4.47738	9.88e-06	0.000288313	2.45117
PTGS2	0.784998	2.91511	4.47727	9.89e-06	0.000288313	2.4507
TRIM16L	0.447601	1.65514	4.47637	9.93e-06	0.000289219	2.44686
SEC24D	0.324489	2.56056	4.47632	9.93e-06	0.000289219	2.44667
RC3H2	0.255221	2.36577	4.47536	9.97e-06	0.000290309	2.44256
ARSK	0.182155	1.15876	4.47472	1e-05	0.000290969	2.43987
WEE2-AS1	-0.139202	0.420526	-4.47421	1e-05	0.000291475	2.43769
STIM1	0.283272	3.1582	4.47325	1.01e-05	0.000292428	2.4336
AP001148.1	-0.138915	0.350532	-4.47321	1.01e-05	0.000292428	2.43343
RPL23AP25	-0.0793078	0.206824	-4.47307	1.01e-05	0.000292428	2.43283
LINC00893	-0.208675	0.618777	-4.47299	1.01e-05	0.000292428	2.4325
FAM129B	0.386798	6.20948	4.47251	1.01e-05	0.000292892	2.43047
DICER1-AS1	-0.240491	1.08724	-4.47185	1.01e-05	0.000293591	2.42768
EGF	0.166238	0.190956	4.47111	1.02e-05	0.000294411	2.4245
FAM111A-DT	-0.222751	1.50373	-4.47061	1.02e-05	0.000294776	2.4224
YME1L1	0.25106	4.38135	4.47058	1.02e-05	0.000294776	2.42228
BBX	0.275084	2.46649	4.46934	1.02e-05	0.000296256	2.41699
NAA35	0.222882	2.69914	4.46916	1.03e-05	0.000296329	2.41624
CAB39P1	0.0811589	0.0957746	4.46822	1.03e-05	0.000297416	2.41223
TRAPPC6A	-0.490867	4.7552	-4.468	1.03e-05	0.000297543	2.4113
LMO2	-0.403984	2.30027	-4.46764	1.03e-05	0.000297863	2.40976
NCAPH	0.412597	2.87739	4.46741	1.03e-05	0.000297996	2.40882
USP34	0.32674	1.87855	4.46727	1.03e-05	0.000298026	2.40821
UBXN2A	0.204884	2.30836	4.46701	1.04e-05	0.00029821	2.4071
CDK2AP2	-0.306623	5.27709	-4.46683	1.04e-05	0.000298283	2.40636
S100A5	-0.502195	1.3557	-4.46666	1.04e-05	0.000298352	2.40562
SRC	-0.430853	4.88235	-4.46614	1.04e-05	0.000298692	2.40339
LIPG	0.486154	1.35292	4.46606	1.04e-05	0.000298692	2.40306
ZNF83	-0.386083	2.59033	-4.46604	1.04e-05	0.000298692	2.40299
ZGPAT	-0.192929	2.04263	-4.4654	1.04e-05	0.000299387	2.40026
MDN1	0.227616	1.686	4.46487	1.05e-05	0.000299768	2.39804
EPHB4	0.38634	3.84201	4.46487	1.05e-05	0.000299768	2.39803
SRRT	-0.187307	5.00633	-4.46404	1.05e-05	0.000300715	2.3945
SERINC1	0.299391	5.22594	4.46384	1.05e-05	0.00030082	2.39366
AC124016.2	-0.28322	0.953726	-4.46268	1.06e-05	0.000302211	2.38875
OSBPL10	0.30463	1.46091	4.46253	1.06e-05	0.000302258	2.38809
NCBP2-AS2	-0.27154	4.77364	-4.46237	1.06e-05	0.000302304	2.38743
TUSC2	-0.270592	3.78786	-4.46182	1.06e-05	0.000302757	2.38508
UTP20	0.237892	2.0781	4.46179	1.06e-05	0.000302757	2.38498
PMVK	-0.326867	5.4461	-4.46136	1.06e-05	0.000303179	2.38314
RINL	-0.311211	1.23924	-4.46013	1.07e-05	0.000304674	2.37794
MICAL2	0.412139	2.17916	4.45988	1.07e-05	0.000304849	2.37688
TEX45	-0.358607	0.698455	-4.45971	1.07e-05	0.00030492	2.37615
KLHL28	0.20297	1.34237	4.45936	1.07e-05	0.000305229	2.37467
AL031186.1	-0.257844	0.978906	-4.45905	1.07e-05	0.000305494	2.37334
HEPHL1	0.491592	0.554531	4.45727	1.08e-05	0.000307748	2.36581
AC008870.2	-0.229929	0.908978	-4.45648	1.08e-05	0.000308664	2.36247
MCMBP	0.221783	3.69307	4.45606	1.09e-05	0.000309031	2.36069
AP001462.1	-0.159131	0.68485	-4.45598	1.09e-05	0.000309031	2.36032
CDCA4	0.362896	3.76619	4.45558	1.09e-05	0.000309279	2.35862
TCEA1P2	0.293533	1.33436	4.45556	1.09e-05	0.000309279	2.35854
AC079148.1	-0.139396	0.450971	-4.45524	1.09e-05	0.000309544	2.35722
NKILA	0.37419	0.893247	4.45489	1.09e-05	0.000309871	2.3557
ASCL2	-0.47777	1.56838	-4.45441	1.09e-05	0.000310367	2.35367
CRTC1	-0.228983	1.80794	-4.45372	1.1e-05	0.000311149	2.35076
TES	0.358398	4.42271	4.45298	1.1e-05	0.000312006	2.34763
TSPO	-0.427615	6.9683	-4.45226	1.11e-05	0.000312838	2.34459
ARHGAP5	0.312562	2.74237	4.4512	1.11e-05	0.000314137	2.3401
SAYSD1	-0.223863	2.94107	-4.45109	1.11e-05	0.000314137	2.33962
AL139349.1	-0.276935	0.820475	-4.45051	1.11e-05	0.000314772	2.33719
BHMT	-1.04113	1.75848	-4.44989	1.12e-05	0.000315479	2.33455
C19orf66	-0.293003	2.97155	-4.44947	1.12e-05	0.000315892	2.3328
RNF141	0.266367	2.51826	4.4493	1.12e-05	0.000315964	2.33208
TM4SF1	0.7951	4.81543	4.44839	1.12e-05	0.000317073	2.32823
PCGF3	-0.323524	3.50398	-4.44782	1.13e-05	0.000317715	2.3258
CLDN23	-0.592771	2.87939	-4.44766	1.13e-05	0.000317769	2.32513
SPRR2E	0.870878	0.969253	4.44562	1.14e-05	0.000320486	2.31651
RPL23P2	-0.201275	0.824619	-4.44446	1.14e-05	0.000321929	2.3116
NAXD	-0.246962	4.27909	-4.44437	1.14e-05	0.000321929	2.31122
AC138207.3	-0.371052	1.33505	-4.4437	1.15e-05	0.00032271	2.30841
STAG1	0.297409	2.06702	4.43938	1.17e-05	0.000328766	2.29017
PI15	0.29021	0.617983	4.43909	1.17e-05	0.000329027	2.28891
GOLGA8A	-0.536544	2.53815	-4.43856	1.17e-05	0.000329614	2.28671
GPR89B	-0.148239	0.817734	-4.43742	1.18e-05	0.000331036	2.28187
TAPT1	-0.171295	1.71198	-4.43735	1.18e-05	0.000331036	2.28161
HECTD1	0.28245	3.25225	4.43655	1.18e-05	0.000332039	2.27822
GREM1	0.655252	1.71888	4.43483	1.19e-05	0.000334398	2.27097
MSTO2P	-0.243407	1.31127	-4.4344	1.2e-05	0.000334859	2.26915
ZFYVE26	0.201024	1.61139	4.43339	1.2e-05	0.000336174	2.26487
PLAU	0.760485	5.41734	4.43328	1.2e-05	0.000336174	2.26442
SETX	0.249334	2.66958	4.43303	1.2e-05	0.000336376	2.26335
DERA	0.306405	3.51116	4.43159	1.21e-05	0.000338346	2.25728
EXOSC5	-0.317213	4.50103	-4.43132	1.21e-05	0.000338566	2.25616
RING1	-0.230964	4.91544	-4.43005	1.22e-05	0.00034029	2.25082
RPS6P25	-0.139716	0.576199	-4.42868	1.23e-05	0.000342176	2.24505
CUEDC2	-0.264039	4.95818	-4.42849	1.23e-05	0.000342293	2.24423
LYPD6	-0.460262	1.78385	-4.42801	1.23e-05	0.000342699	2.24222
KLF6	0.412909	4.91001	4.42798	1.23e-05	0.000342699	2.2421
SIRPA	0.569489	2.78515	4.42735	1.23e-05	0.00034348	2.23944
AL391834.2	-0.345562	1.89986	-4.42636	1.24e-05	0.000344808	2.23526
AL391280.1	0.125957	0.342718	4.42517	1.25e-05	0.000346441	2.23026
TMEM161B-AS1	-0.211488	1.02139	-4.4246	1.25e-05	0.00034714	2.22784
AL161431.1	0.741285	1.13513	4.42433	1.25e-05	0.000347359	2.22674
BCAR3	0.399895	2.89645	4.42345	1.26e-05	0.000348535	2.22302
FANCB	0.185186	0.801136	4.4229	1.26e-05	0.000349204	2.2207
ATRN	0.263354	3.32982	4.42233	1.26e-05	0.0003499	2.21831
ATL3	0.330875	3.41387	4.42039	1.27e-05	0.000352719	2.21016
LTBP2	0.557661	3.0316	4.42013	1.27e-05	0.000352938	2.20908
TTC21A	-0.21188	0.840271	-4.41993	1.28e-05	0.000353009	2.20824
BDP1	0.2299	1.57489	4.41985	1.28e-05	0.000353009	2.2079
CD44	0.723269	4.70941	4.41935	1.28e-05	0.000353608	2.20579
SLCO1B3	0.351115	0.372465	4.41892	1.28e-05	0.000354095	2.20398
ALKBH2	-0.27353	3.16405	-4.41856	1.28e-05	0.000354395	2.20246
CSNK1A1	0.324661	3.38208	4.4185	1.28e-05	0.000354395	2.20219
OSBPL2	-0.245971	2.83154	-4.41756	1.29e-05	0.000355682	2.19824
AC231657.1	-0.142354	0.321168	-4.41718	1.29e-05	0.000356084	2.19667
METTL26	-0.323719	4.89436	-4.41586	1.3e-05	0.00035798	2.19112
PAFAH1B1	0.199284	3.81706	4.41531	1.3e-05	0.000358662	2.18881
RPL37P23	-0.229414	0.785232	-4.41513	1.3e-05	0.000358758	2.18806
FOXD1	0.462895	0.922558	4.41497	1.3e-05	0.000358768	2.1874
AL353743.1	-0.226379	1.18577	-4.41489	1.3e-05	0.000358768	2.18705
SCNM1	-0.275386	3.58611	-4.41448	1.31e-05	0.000359244	2.1853
PCDHGA4	0.108975	0.226426	4.41399	1.31e-05	0.000359729	2.18327
AC011477.1	-0.193561	1.04999	-4.41386	1.31e-05	0.000359729	2.18272
XAB2	-0.229114	4.06717	-4.41363	1.31e-05	0.000359729	2.18175
2021-03-09	-0.296081	2.71725	-4.41359	1.31e-05	0.000359729	2.18158
MARCKSL1	-0.507489	6.98253	-4.41354	1.31e-05	0.000359729	2.18138
SINHCAFP1	0.0446162	0.0725644	4.41347	1.31e-05	0.000359729	2.18107
FBN2	0.581267	1.14369	4.41224	1.32e-05	0.000361496	2.17591
HOXB6	-0.5761	2.00293	-4.41183	1.32e-05	0.000361808	2.17421
PGLYRP3	0.618368	0.934497	4.41181	1.32e-05	0.000361808	2.17411
SPAG8	-0.133055	0.422331	-4.41158	1.32e-05	0.000361991	2.17314
AL021368.3	-0.093051	0.112195	-4.41058	1.33e-05	0.000363402	2.16894
ACP7	0.3912	0.6931	4.40846	1.34e-05	0.00036662	2.16005
MRPL38	-0.190984	1.84954	-4.4073	1.35e-05	0.0003683	2.15521
OTUD5	-0.176847	4.46244	-4.4064	1.35e-05	0.000369574	2.15143
COX6A1P2	-0.283403	1.90033	-4.40613	1.36e-05	0.000369828	2.15029
UCHL5	0.255014	2.63512	4.40522	1.36e-05	0.000370969	2.14646
AL662844.4	-0.165264	0.579082	-4.4052	1.36e-05	0.000370969	2.14638
PHYKPL	-0.229714	1.97466	-4.40322	1.37e-05	0.000374016	2.1381
KRAS	0.287331	2.98271	4.4024	1.38e-05	0.000375171	2.13467
AC092171.4	-0.236406	0.85985	-4.40194	1.38e-05	0.000375691	2.13274
AC009812.1	-0.275145	1.09794	-4.40186	1.38e-05	0.000375691	2.13238
OCIAD2	-0.35058	4.89806	-4.40159	1.38e-05	0.00037574	2.13125
ZNF766	-0.200665	2.05734	-4.4015	1.38e-05	0.00037574	2.1309
AC087500.1	-0.118174	0.538167	-4.40148	1.38e-05	0.00037574	2.13079
SLC25A5P1	-0.157405	0.43216	-4.40136	1.38e-05	0.00037574	2.13032
AC026356.1	0.205002	0.830047	4.40083	1.39e-05	0.000376369	2.12807
FRS3	-0.218269	1.76988	-4.40064	1.39e-05	0.000376369	2.12727
AL391094.1	-0.123712	0.237882	-4.40064	1.39e-05	0.000376369	2.12727
AC109347.2	-0.217793	0.972566	-4.40041	1.39e-05	0.000376557	2.12631
AARSD1	-0.160786	1.33045	-4.40018	1.39e-05	0.000376749	2.12534
PBK	0.430626	2.75162	4.39991	1.39e-05	0.000376847	2.12424
SAP18	-0.209007	5.28218	-4.39989	1.39e-05	0.000376847	2.12413
NDUFS7	-0.22789	2.9411	-4.39897	1.4e-05	0.00037804	2.12029
EPB41L4A-AS1	-0.285942	2.388	-4.39894	1.4e-05	0.00037804	2.12015
KHDC4	-0.318435	3.31667	-4.39875	1.4e-05	0.000378151	2.11939
ANAPC4	-0.223599	2.36528	-4.3973	1.41e-05	0.000380196	2.11331
SIRT7	-0.257797	3.08357	-4.3973	1.41e-05	0.000380196	2.11329
ZNF281	0.28055	2.2912	4.39593	1.42e-05	0.000382283	2.10759
AC080023.1	0.111033	0.314802	4.39574	1.42e-05	0.000382424	2.10676
ELOVL7	0.375592	1.74866	4.39432	1.43e-05	0.000384522	2.10082
CAPRIN1	0.279221	4.75943	4.39416	1.43e-05	0.000384522	2.10018
LINC01341	-0.401137	1.00877	-4.39414	1.43e-05	0.000384522	2.1001
PPP1R1C	0.176082	0.420385	4.39348	1.43e-05	0.000385455	2.09731
ADORA2B	0.5032	2.01575	4.39277	1.44e-05	0.000386464	2.09434
GLOD5	-0.124676	0.306473	-4.39252	1.44e-05	0.000386695	2.09329
MT-ND1	-0.577244	11.558	-4.39231	1.44e-05	0.000386775	2.09241
MIR3685	-0.387148	2.44551	-4.39224	1.44e-05	0.000386775	2.09213
VCL	0.342678	4.09657	4.39182	1.44e-05	0.000387299	2.09037
KDSR	0.227058	2.9478	4.39069	1.45e-05	0.000389024	2.08565
ID2	-0.575061	3.97374	-4.38876	1.46e-05	0.00039213	2.0776
CDC42EP3	0.381121	2.26086	4.38846	1.46e-05	0.000392447	2.07635
GALNT6	0.471745	2.02814	4.38813	1.47e-05	0.000392827	2.07495
AC063948.1	-0.225915	0.907518	-4.38778	1.47e-05	0.000393223	2.07351
MKI67	0.431599	3.28727	4.38744	1.47e-05	0.000393615	2.07209
AC023302.1	-0.176229	0.516	-4.38731	1.47e-05	0.00039365	2.07152
ELOB	-0.308865	7.05398	-4.38546	1.48e-05	0.000396643	2.06383
[truncated: 51,412 more rows]
