# Supplementary material for: Development and validation of an intra-tumor heterogeneity-related signature to predict prognosis of bladder cancer: a study based on single-cell RNA-seq
Source: Aging (Albany NY). 2021 Aug 2;13(15):19415–41. doi: 10.18632/aging.203353 (PMC8386527; doi:10.18632/aging.203353)
Supplement: Supplementary Table 17 [file aging-13-203353-s013.xls]

## Sheet: by cmap name
Supplementary Table 17. The potential compounds targeting HRS via Connectivity Map analysis.
rank	cmap name	mean	n	enrichment	p	specificity	percent non-null
1	wortmannin	-0.437	18	-0.691	0	0.0127	83
2	LY-294002	-0.307	61	-0.46	0	0.0859	59
3	tanespimycin	0.268	62	0.372	0	0.2021	56
4	lycorine	0.594	5	0.899	4e-05	0.0062	100
5	nefopam	0.549	5	0.832	0.00028	0.006	100
6	cephaeline	-0.455	5	-0.8	0.0007	0.0843	80
7	naltrexone	0.431	5	0.8	0.00078	0	100
8	15-delta prostaglandin J2	0.322	15	0.482	0.00102	0.2793	66
9	tolfenamic acid	-0.562	4	-0.837	0.00123	0	100
10	podophyllotoxin	0.666	4	0.804	0.00277	0.0381	100
11	chloropyrazine	0.472	4	0.796	0.00338	0.0127	100
12	hydrastinine	-0.306	5	-0.723	0.00348	0.0049	60
13	emetine	-0.454	4	-0.783	0.00448	0.0824	75
14	yohimbine	-0.38	5	-0.701	0.00519	0.0054	80
15	levothyroxine sodium	0.43	4	0.771	0.00539	0.0136	100
16	triprolidine	0.465	4	0.766	0.00575	0	75
17	metoprolol	0.289	4	0.759	0.00631	0	75
18	metolazone	-0.462	5	-0.684	0.00721	0	80
19	epitiostanol	0.392	4	0.752	0.00732	0	75
20	gabapentin	-0.274	4	-0.747	0.00814	0.0056	50
21	oxyphenbutazone	0.335	4	0.736	0.00941	0.0674	75
22	strophanthidin	0.45	4	0.734	0.00985	0.0897	75
23	desipramine	0.35	4	0.725	0.01144	0.0368	75
24	5224221	0.577	2	0.922	0.01185	0.2179	100
25	chlortetracycline	-0.311	5	-0.654	0.0121	0.0091	60
26	bretylium tosilate	-0.428	4	-0.713	0.01383	0.0275	75
27	penbutolol	-0.244	3	-0.808	0.01412	0.0148	66
28	PF-00539745-00	0.384	3	0.806	0.01462	0.0283	100
29	tiaprofenic acid	-0.242	4	-0.709	0.01484	0.0183	50
30	fluticasone	0.177	4	0.704	0.01593	0.0258	50
31	Prestwick-682	-0.214	4	-0.703	0.01601	0.028	50
32	deferoxamine	-0.271	8	-0.515	0.01729	0.0307	62
33	fenspiride	-0.383	5	-0.627	0.01864	0.0243	80
34	molindone	0.425	4	0.691	0.01898	0.025	75
35	harmol	-0.313	4	-0.692	0.01922	0.0929	75
36	6-bromoindirubin-3'-oxime	-0.374	7	-0.537	0.0195	0.1729	57
37	cotinine	-0.303	6	-0.573	0.02159	0.0402	66
38	tubocurarine chloride	-0.425	4	-0.683	0.02218	0.0152	75
39	cloxacillin	-0.321	4	-0.681	0.02274	0.0303	50
40	alfadolone	0.473	3	0.769	0.02444	0.0118	100
41	fludroxycortide	0.236	5	0.616	0.02463	0.0159	60
42	SC-560	0.49	3	0.768	0.02476	0.0476	100
43	lasalocid	0.42	4	0.671	0.02602	0.1667	75
44	arecoline	0.415	4	0.662	0.02962	0.04	75
45	foliosidine	-0.11	6	-0.553	0.03035	0.0815	66
46	chlorphenesin	-0.442	4	-0.659	0.03087	0.0437	75
47	vancomycin	-0.218	4	-0.656	0.03203	0.1172	50
48	dicycloverine	0.409	5	0.597	0.03266	0.0663	80
49	diloxanide	-0.32	4	-0.653	0.03428	0.1	50
50	BCB000040	-0.217	4	-0.648	0.03625	0.0219	50
51	convolamine	-0.252	4	-0.647	0.03686	0.027	50
52	anisomycin	0.444	4	0.647	0.03724	0.4433	75
53	ampicillin	-0.336	4	-0.644	0.03811	0.0315	50
54	guanabenz	0.364	5	0.584	0.03867	0.2473	80
55	guaifenesin	-0.372	6	-0.538	0.03921	0.1083	66
56	tinidazole	-0.29	6	-0.535	0.0403	0.0457	50
57	meclocycline	-0.156	4	-0.638	0.04132	0.0227	50
58	CP-944629	-0.428	4	-0.637	0.04156	0.0879	75
59	tribenoside	0.33	4	0.637	0.04227	0.1005	75
60	chloramphenicol	0.263	4	0.633	0.04496	0.0486	50
61	clebopride	0.341	4	0.632	0.04544	0.0438	75
62	brinzolamide	-0.188	4	-0.63	0.04589	0.0757	50
63	minocycline	-0.261	5	-0.565	0.04708	0.0385	60
64	tolazamide	0.39	3	0.709	0.04829	0.0396	66
65	saquinavir	-0.228	4	-0.625	0.04864	0.0227	50
66	perphenazine	0.378	5	0.567	0.04868	0.2835	60
67	Prestwick-665	-0.356	5	-0.562	0.04908	0.1429	60
68	ofloxacin	-0.247	5	-0.562	0.04932	0.0636	60
69	amantadine	-0.321	4	-0.621	0.0517	0.183	75
70	atropine methonitrate	-0.267	3	-0.705	0.05234	0.0546	66
71	fusaric acid	0.243	4	0.618	0.05389	0.0775	50
72	0198306-0000	-0.38	4	-0.617	0.05403	0.1136	75
73	CP-863187	-0.338	4	-0.616	0.05488	0.1059	75
74	canavanine	-0.433	3	-0.7	0.05506	0.0773	66
75	alprenolol	-0.266	4	-0.614	0.0562	0.0299	50
76	nimesulide	-0.366	4	-0.614	0.05632	0.0387	75
77	valdecoxib	-0.207	3	-0.698	0.05635	0.0327	66
78	vinburnine	0.379	4	0.612	0.05827	0.076	75
79	cycloserine	-0.358	4	-0.609	0.05994	0.2033	75
80	lobelanidine	-0.218	4	-0.609	0.05994	0.0552	50
81	nocodazole	0.193	6	0.501	0.06432	0.234	50
82	ramifenazone	-0.226	4	-0.602	0.06517	0.0382	50
83	clofazimine	0.314	5	0.538	0.07075	0.2582	60
84	timolol	0.376	4	0.592	0.07253	0.3315	75
85	loxapine	0.31	4	0.592	0.07295	0.0692	50
86	bupropion	-0.304	4	-0.591	0.0749	0.1235	75
87	mometasone	0.254	4	0.589	0.07512	0.2462	50
88	trimethylcolchicinic acid	0.433	4	0.589	0.07555	0.0573	75
89	allantoin	0.225	5	0.53	0.07792	0.0438	60
90	eticlopride	0.348	4	0.585	0.07903	0.2944	75
91	theobromine	0.365	4	0.583	0.08045	0.0276	75
92	nialamide	-0.194	4	-0.584	0.08184	0.1592	75
93	chenodeoxycholic acid	0.4	4	0.581	0.08216	0.3791	75
94	fluoxetine	-0.227	4	-0.582	0.08329	0.1083	50
95	dyclonine	0.403	4	0.579	0.08399	0.0852	75
96	ursolic acid	0.299	4	0.579	0.08413	0.1314	75
97	vincamine	0.228	6	0.481	0.08456	0.2817	66
98	methylergometrine	-0.321	4	-0.58	0.08494	0.1488	75
99	danazol	0.208	4	0.578	0.08528	0.0364	50
100	kinetin	0.262	4	0.577	0.08582	0.0327	50
101	amodiaquine	-0.226	4	-0.579	0.08645	0.0987	50
102	procaine	-0.419	5	-0.518	0.08731	0.3503	60
103	picotamide	-0.322	5	-0.515	0.09112	0.15	60
104	oxaprozin	0.216	6	0.474	0.09181	0.1177	66
105	equilin	0.26	5	0.517	0.09216	0.1494	60
106	tridihexethyl	-0.208	4	-0.571	0.09397	0.1717	75
107	furosemide	0.236	4	0.568	0.09425	0.1503	75
108	ciclacillin	0.339	4	0.568	0.09467	0.0226	75
109	levamisole	-0.374	4	-0.57	0.09545	0.2062	50
110	homosalate	0.257	4	0.565	0.09698	0.0544	75
111	etacrynic acid	-0.301	3	-0.634	0.10085	0.0898	66
112	zidovudine	0.398	4	0.562	0.10126	0.0859	75
113	arachidonyltrifluoromethane	0.362	2	0.774	0.10253	0.1069	100
114	debrisoquine	0.286	4	0.56	0.10285	0.034	75
115	racecadotril	0.229	4	0.559	0.1037	0.0705	75
116	bephenium hydroxynaphthoate	-0.29	5	-0.505	0.10394	0.1582	60
117	proglumide	-0.201	5	-0.503	0.1061	0.0765	60
118	(-)-atenolol	-0.233	4	-0.559	0.10667	0.1023	75
119	loracarbef	-0.059	4	-0.555	0.11124	0.1675	50
120	methapyrilene	0.269	4	0.552	0.11148	0.0602	50
121	levopropoxyphene	-0.132	4	-0.55	0.11781	0.3333	50
122	atropine	-0.326	4	-0.549	0.11856	0.3564	50
123	laudanosine	0.236	4	0.543	0.12184	0.0388	50
124	megestrol	0.308	4	0.54	0.12588	0.2364	75
125	IC-86621	0.292	4	0.54	0.12632	0.1656	75
126	paroxetine	-0.217	4	-0.54	0.1292	0.125	50
127	spectinomycin	0.268	4	0.536	0.13175	0.0694	50
128	carbenoxolone	-0.144	4	-0.538	0.13215	0.1509	50
129	dexibuprofen	-0.12	4	-0.538	0.13233	0.0867	50
130	verteporfin	-0.373	3	-0.606	0.13384	0.343	66
131	11-deoxy-16,16-dimethylprostaglandin E2	-0.196	4	-0.535	0.13555	0.1611	50
132	zimeldine	-0.284	5	-0.481	0.13788	0.4286	60
133	pilocarpine	0.18	4	0.53	0.13897	0.4025	75
134	etodolac	0.196	5	0.48	0.1411	0.1324	60
135	2,6-dimethylpiperidine	-0.191	5	-0.476	0.14513	0.1622	60
136	colchicine	0.303	6	0.436	0.14695	0.2471	50
137	midecamycin	-0.229	5	-0.475	0.14807	0.1192	60
138	15(S)-15-methylprostaglandin E2	0.351	4	0.523	0.1491	0.3107	75
139	hycanthone	-0.208	4	-0.523	0.15111	0.2017	50
140	copper sulfate	0.221	4	0.519	0.15373	0.1989	75
141	meptazinol	0.236	4	0.516	0.15851	0.1654	50
142	zardaverine	0.264	4	0.514	0.1604	0.1957	50
143	etilefrine	0.195	4	0.513	0.16153	0.2164	50
144	idoxuridine	0.308	5	0.466	0.16455	0.2096	60
145	orciprenaline	0.243	4	0.511	0.16525	0.1454	50
146	pivampicillin	0.104	4	0.51	0.16593	0.104	50
147	terbutaline	0.27	4	0.509	0.16792	0.1159	50
148	fosfosal	0.181	4	0.508	0.17044	0.1135	50
149	5253409	0.205	2	0.708	0.1708	0.1795	50
150	0316684-0000	-0.145	4	-0.507	0.1739	0.1282	50
151	seneciphylline	0.293	4	0.504	0.17621	0.094	50
152	cinchocaine	-0.215	5	-0.458	0.17721	0.2932	60
153	spiperone	0.36	2	0.701	0.17848	0.3081	50
154	solanine	0.286	4	0.502	0.1786	0.1473	50
155	trichlormethiazide	0.262	4	0.502	0.17947	0.125	50
156	staurosporine	-0.19	4	-0.504	0.17957	0.1644	50
157	Prestwick-981	0.293	3	0.575	0.18031	0.1323	66
158	PHA-00816795	-0.295	2	-0.7	0.18033	0.199	50
159	exisulind	-0.151	2	-0.697	0.18384	0.1322	50
160	meropenem	0.198	4	0.499	0.18439	0.2358	50
161	letrozole	0.298	4	0.499	0.18502	0.0952	50
162	orphenadrine	0.303	6	0.415	0.18599	0.3282	50
163	Prestwick-967	0.225	4	0.496	0.18914	0.1538	50
164	STOCK1N-35874	-0.211	2	-0.691	0.19023	0.2914	50
165	zoxazolamine	-0.317	4	-0.496	0.19171	0.3788	50
166	bicuculline	0.282	4	0.494	0.19256	0.1704	50
167	azlocillin	-0.222	4	-0.495	0.1933	0.2598	50
168	artemisinin	-0.156	3	-0.567	0.19331	0.1928	66
169	cisapride	0.272	4	0.492	0.19549	0.097	50
170	tacrine	0.183	4	0.49	0.20022	0.1321	50
171	flutamide	0.221	5	0.446	0.20397	0.2279	60
172	Prestwick-1085	0.233	4	0.487	0.20424	0.1469	50
173	estropipate	0.294	4	0.487	0.20424	0.2156	50
174	pindolol	0.231	5	0.446	0.20425	0.4458	60
175	PF-00875133-00	0.371	3	0.561	0.20491	0.1566	66
176	naftidrofuryl	-0.218	4	-0.489	0.20532	0.098	50
177	propidium iodide	-0.151	4	-0.488	0.20565	0.1192	50
178	diethylstilbestrol	0.242	6	0.406	0.2073	0.6105	50
179	N-acetyl-L-aspartic acid	0.361	4	0.484	0.20939	0.2063	50
180	isoxicam	0.347	5	0.443	0.21033	0.5244	60
181	buspirone	0.172	4	0.483	0.21242	0.1351	50
182	5230742	-0.187	2	-0.673	0.21416	0.2951	50
183	harmaline	0.245	4	0.481	0.215	0.1268	50
184	zalcitabine	0.08	4	0.481	0.21532	0.15	50
185	trihexyphenidyl	0.358	3	0.554	0.21653	0.6257	66
186	minoxidil	0.076	5	0.438	0.22071	0.1333	60
187	oxamniquine	0.247	4	0.478	0.22103	0.1301	50
188	benzonatate	0.151	5	0.438	0.22109	0.0889	60
189	noretynodrel	0.111	4	0.476	0.22505	0.226	50
190	leflunomide	-0.164	4	-0.479	0.22523	0.3185	50
191	fenoprofen	-0.224	6	-0.399	0.22582	0.5714	50
192	hydralazine	0.162	6	0.397	0.22721	0.2439	50
193	clobetasol	-0.313	3	-0.548	0.22829	0.1788	66
194	azapropazone	0.155	3	0.547	0.23037	0.2182	66
195	diflorasone	0.197	4	0.472	0.2346	0.2185	50
196	flumequine	-0.213	4	-0.472	0.24027	0.2924	50
197	Prestwick-1082	0.333	3	0.537	0.25118	0.579	66
198	estriol	0.139	4	0.464	0.25175	0.3273	50
199	disopyramide	0.043	4	0.463	0.25489	0.3007	50
200	captopril	-0.183	5	-0.422	0.25545	0.3228	60
201	NU-1025	-0.181	2	-0.643	0.25617	0.2151	50
202	lincomycin	0.3	3	0.532	0.26184	0.2126	66
203	mesoridazine	0.233	4	0.457	0.26856	0.1628	50
204	zuclopenthixol	0.058	4	0.457	0.26945	0.2568	50
205	tetrahydroalstonine	0.317	4	0.456	0.26983	0.2866	50
206	caffeic acid	-0.306	3	-0.527	0.27065	0.4074	66
207	isoflupredone	0.371	3	0.527	0.27139	0.7552	66
208	(+)-chelidonine	0.333	4	0.456	0.27146	0.3846	50
209	hecogenin	-0.08	4	-0.457	0.27263	0.4033	50
210	hexetidine	0.308	4	0.454	0.27508	0.6742	50
211	diltiazem	-0.234	5	-0.412	0.2772	0.5469	60
212	W-13	-0.219	2	-0.624	0.28401	0.255	50
213	ciprofloxacin	-0.145	5	-0.41	0.28437	0.3497	60
214	ronidazole	-0.34	3	-0.52	0.28636	0.6066	66
215	CAY-10397	-0.154	3	-0.517	0.29116	0.3978	66
216	pentoxyverine	-0.339	4	-0.449	0.29217	0.5685	50
217	3-hydroxy-DL-kynurenine	0.199	6	0.372	0.29445	0.2256	50
218	neostigmine bromide	-0.246	4	-0.448	0.29611	0.3218	50
219	levocabastine	0.264	4	0.445	0.29724	0.1885	50
220	biotin	-0.325	3	-0.513	0.30118	0.1932	66
221	methoxsalen	-0.138	3	-0.513	0.30128	0.2471	66
222	cyclobenzaprine	0.298	4	0.442	0.30506	0.5417	50
223	alpha-yohimbine	0.327	3	0.511	0.30777	0.4132	66
224	amiprilose	0.178	4	0.441	0.30828	0.2958	50
225	theophylline	0.276	4	0.439	0.31369	0.2015	50
226	dydrogesterone	0.236	4	0.439	0.31435	0.3052	50
227	santonin	0.236	4	0.438	0.31857	0.2032	50
228	clindamycin	0.282	5	0.397	0.31926	0.2899	60
229	dobutamine	0.261	4	0.437	0.3194	0.3218	50
230	karakoline	0.217	6	0.362	0.32202	0.5134	50
231	gliclazide	-0.319	4	-0.437	0.32439	0.62	50
232	disulfiram	0.279	5	0.394	0.32765	0.6705	60
233	gliquidone	-0.068	4	-0.436	0.32819	0.2857	50
234	vinblastine	0.293	3	0.501	0.32946	0.6022	66
235	ethotoin	-0.241	6	-0.361	0.32947	0.6754	50
236	alfuzosin	0.182	5	0.392	0.33205	0.25	60
237	valinomycin	0.217	4	0.431	0.33611	0.6919	50
238	flumetasone	0.179	6	0.358	0.3366	0.2546	50
239	amiloride	0.077	5	0.39	0.33904	0.3083	60
240	clorgiline	-0.082	4	-0.431	0.34067	0.328	50
241	16-phenyltetranorprostaglandin E2	-0.134	4	-0.43	0.34339	0.2857	50
242	calycanthine	0.288	4	0.428	0.34496	0.3254	50
243	xylometazoline	-0.154	4	-0.429	0.34514	0.4807	50
244	vigabatrin	0.34	3	0.493	0.34659	0.6118	66
245	bacitracin	0.277	3	0.492	0.35115	0.3878	66
246	thiocolchicoside	-0.291	4	-0.427	0.35161	0.5305	50
247	rolipram	0.255	4	0.424	0.35604	0.2813	50
248	picrotoxinin	-0.184	4	-0.425	0.35801	0.3425	50
249	quinisocaine	0.253	4	0.423	0.35831	0.4546	50
250	epiandrosterone	0.164	4	0.423	0.35955	0.4607	50
251	nisoxetine	-0.184	4	-0.422	0.36697	0.372	50
252	phenindione	0.129	4	0.42	0.36768	0.4173	50
253	tropine	0.301	4	0.418	0.37176	0.3688	50
254	chlorhexidine	0.28	5	0.378	0.37383	0.486	60
255	spiradoline	-0.172	4	-0.419	0.37526	0.314	50
256	tetrandrine	0.258	4	0.417	0.37653	0.5931	50
257	sulfamethizole	-0.184	4	-0.416	0.38376	0.3898	50
258	midodrine	0.235	5	0.372	0.39239	0.6201	60
259	triflupromazine	0.296	4	0.411	0.39289	0.5918	50
260	sisomicin	0.216	4	0.411	0.39426	0.2658	50
261	antazoline	0.092	4	0.411	0.39527	0.451	50
262	kaempferol	0.275	4	0.409	0.39895	0.4583	50
263	khellin	0.175	5	0.37	0.40158	0.5542	60
264	pizotifen	0.285	4	0.408	0.40253	0.5765	50
265	metformin	0.106	10	0.267	0.40316	0.4472	50
266	nifuroxazide	0.163	4	0.407	0.40745	0.5848	50
267	Prestwick-1084	-0.181	4	-0.406	0.4156	0.8047	50
268	meteneprost	-0.06	4	-0.406	0.41706	0.6484	50
269	harmalol	0.247	3	0.464	0.4191	0.4892	66
270	hesperidin	-0.07	4	-0.402	0.4283	0.4171	50
271	chlorpropamide	-0.155	6	-0.331	0.42879	0.4725	50
272	PNU-0230031	0.063	8	0.29	0.43136	0.3667	50
273	mercaptopurine	-0.271	2	-0.534	0.43459	0.4452	50
274	nitrofural	0.256	4	0.397	0.43723	0.4444	50
275	rifampicin	0.273	4	0.396	0.44288	0.6512	50
276	buflomedil	-0.213	4	-0.396	0.44624	0.612	50
277	quercetin	-0.133	6	-0.325	0.4534	0.4127	50
278	esculetin	0.243	3	0.449	0.45846	0.6154	66
279	pregnenolone	0.153	4	0.391	0.45887	0.5613	50
280	iobenguane	0.249	4	0.39	0.45983	0.3271	50
281	proxyphylline	-0.102	4	-0.391	0.46343	0.6287	50
282	PNU-0293363	0.014	3	0.446	0.46689	0.4654	66
283	aconitine	0.28	4	0.388	0.4677	0.4379	50
284	nifurtimox	0.216	4	0.386	0.47423	0.3611	50
285	quinpirole	0.259	4	0.385	0.47737	0.7062	50
286	meclofenoxate	-0.158	6	-0.319	0.47829	0.7426	50
287	colistin	0.27	4	0.384	0.47998	0.7418	50
288	asiaticoside	0.236	4	0.383	0.4834	0.4591	50
289	ioxaglic acid	-0.018	3	0.44	0.48394	0.4508	66
290	procarbazine	0.308	3	0.44	0.48448	0.4947	66
291	luteolin	-0.261	4	-0.384	0.48593	0.8229	50
292	spiramycin	0.161	6	0.315	0.48768	0.5152	50
293	mimosine	0.233	3	0.438	0.48788	0.5583	66
294	cobalt chloride	0.222	3	0.438	0.4901	0.5405	66
295	raubasine	0.281	4	0.379	0.49619	0.609	50
296	piroxicam	0.247	4	0.379	0.49758	0.4752	50
297	dimenhydrinate	0.264	4	0.378	0.50023	0.6185	50
298	iopamidol	0.247	4	0.376	0.50773	0.7421	50
299	benperidol	0.121	4	0.375	0.51049	0.4161	50
300	securinine	0.256	4	0.375	0.51191	0.7273	50
301	lomustine	0.127	4	0.373	0.51636	0.6294	50
302	hemicholinium	0.172	4	0.373	0.51704	0.4242	50
303	florfenicol	0.183	4	0.372	0.52124	0.536	50
304	flufenamic acid	-0.132	6	-0.308	0.52151	0.7371	50
305	flecainide	0.177	6	0.308	0.52161	0.4655	50
306	1,4-chrysenequinone	-0.366	2	-0.494	0.52312	0.625	50
307	repaglinide	-0.224	4	-0.372	0.52583	0.7843	50
308	isosorbide	0.279	4	0.371	0.52589	0.5531	50
309	acetylsalicylsalicylic acid	-0.115	4	-0.37	0.5354	0.6085	50
310	bendroflumethiazide	0.14	6	0.303	0.54148	0.6449	50
311	metrizamide	0.248	4	0.366	0.5424	0.6781	50
312	oxantel	-0.185	4	-0.367	0.54457	0.5536	50
313	suramin sodium	0.014	4	-0.366	0.54921	0.6024	50
314	cefepime	0.143	4	0.364	0.54978	0.6452	50
315	remoxipride	-0.254	4	-0.365	0.55	0.7598	50
316	Prestwick-920	0.084	4	0.362	0.55822	0.5407	50
317	cytisine	0.238	4	0.361	0.55973	0.7081	50
318	ethaverine	-0.234	4	-0.363	0.55979	0.6497	50
319	chlorphenamine	0.09	4	0.361	0.56116	0.488	50
320	sulfaphenazole	-0.066	4	-0.36	0.5692	0.6436	50
321	Prestwick-1080	0.201	4	0.358	0.56948	0.5263	50
322	corbadrine	-0.238	4	-0.359	0.57172	0.646	50
323	cinnarizine	0.106	4	0.357	0.57445	0.5183	50
324	nipecotic acid	-0.242	4	-0.357	0.57863	0.7766	50
325	suprofen	0.214	4	0.352	0.59086	0.5135	50
326	alimemazine	-0.12	4	-0.353	0.59194	0.6327	50
327	5155877	0.103	4	0.351	0.59474	0.725	50
328	thiethylperazine	0.089	4	0.349	0.60194	0.6539	50
329	quinethazone	0.049	4	0.349	0.60317	0.582	50
330	meglumine	-0.124	4	-0.349	0.60674	0.5325	50
331	cefamandole	0.155	4	0.347	0.60831	0.8021	50
332	imatinib	0.161	2	0.47	0.61044	0.7469	50
333	phenacetin	-0.171	4	-0.348	0.61103	0.6539	50
334	cicloheximide	0.232	4	0.344	0.61847	0.7966	50
335	maprotiline	0.231	4	0.343	0.62225	0.8454	50
336	metixene	-0.153	4	-0.343	0.62802	0.6385	50
337	iopromide	0.136	4	0.342	0.62812	0.7671	50
338	ketotifen	0.265	4	0.341	0.63041	0.7895	50
339	oxprenolol	-0.228	4	-0.342	0.63106	0.7673	50
340	withaferin A	0.19	4	0.339	0.63681	0.9158	50
341	flucloxacillin	0.092	4	0.338	0.64071	0.6558	50
342	AH-6809	-0.107	2	-0.461	0.64348	0.6592	50
343	ribavirin	0.101	4	0.336	0.64579	0.8063	50
344	5211181	0.22	2	0.459	0.65112	0.5876	50
345	piperlongumine	-0.297	2	-0.458	0.65436	0.7785	50
346	S-propranolol	-0.117	4	-0.335	0.65551	0.6342	50
347	aceclofenac	0.169	4	0.334	0.65595	0.548	50
348	mexiletine	0.168	6	0.277	0.65647	0.6479	50
349	nafcillin	0.206	4	0.332	0.66027	0.7333	50
350	naringenin	0.257	4	0.332	0.66027	0.8351	50
351	ganciclovir	-0.126	4	-0.332	0.66464	0.6384	50
352	myricetin	0.276	4	0.331	0.66494	0.8508	50
353	hydroquinine	0.239	4	0.327	0.67793	0.7544	50
354	sulfacetamide	0.106	4	0.326	0.6808	0.6325	50
355	bezafibrate	-0.194	4	-0.327	0.68153	0.7871	50
356	clorsulon	0.308	4	0.325	0.68394	0.848	50
357	oxybenzone	0.233	4	0.324	0.68752	0.8412	50
358	practolol	-0.041	4	-0.325	0.68905	0.6888	50
359	sulfametoxydiazine	-0.089	4	-0.324	0.69058	0.8689	50
360	altretamine	0.177	4	0.323	0.69202	0.6774	50
361	roxithromycin	-0.203	4	-0.324	0.69323	0.8889	50
362	lymecycline	-0.219	4	-0.323	0.69502	0.8091	50
363	mebeverine	-0.039	4	-0.322	0.69795	0.6707	50
364	chlormezanone	0.064	4	0.321	0.6983	0.7305	50
365	DL-thiorphan	-0.281	2	-0.442	0.70416	0.9546	50
366	piracetam	0.09	4	0.319	0.70477	0.5878	50
367	doxazosin	-0.215	4	-0.319	0.70944	0.9333	50
368	dorzolamide	0.098	4	0.317	0.71022	0.6928	50
369	oxedrine	-0.061	4	-0.317	0.71489	0.6279	50
370	physostigmine	0.073	4	0.314	0.72168	0.5882	50
371	tiletamine	0.017	4	0.313	0.72605	0.7941	50
372	piribedil	-0.148	4	-0.313	0.72826	0.79	50
373	semustine	0.224	4	0.311	0.73017	0.8588	50
374	aminophylline	0.013	4	0.303	0.75798	0.6936	50
375	levomepromazine	0.249	4	0.302	0.76049	0.9707	50
376	clofibrate	-0.186	2	-0.421	0.76609	0.6327	50
377	cinchonine	0.097	4	0.298	0.77159	0.94	50
378	clidinium bromide	0.078	4	0.298	0.77213	0.8121	50
379	fasudil	0.265	2	0.414	0.78623	0.7556	50
380	pheneticillin	0.115	4	0.293	0.78679	0.9057	50
381	folic acid	0.114	4	0.292	0.79077	0.8921	50
382	praziquantel	0.079	4	0.286	0.80785	0.8684	50
383	pyrithyldione	0.106	4	0.284	0.81476	0.9	50
384	pivmecillinam	0.2	4	0.283	0.81802	0.8931	50
385	TTNPB	0.255	2	0.398	0.8253	0.8758	50
386	cromoglicic acid	0.248	2	0.389	0.84479	0.8168	50
387	SC-19220	0.095	4	0.273	0.84772	0.8623	50
388	Prestwick-642	0.2	4	0.268	0.86151	0.9641	50
389	5182598	0.241	2	0.38	0.86538	0.9281	50
390	5279552	0.207	2	0.334	0.94539	0.9653	50
391	butein	0.026	2	-0.309	0.97161	0.9858	50
392	STOCK1N-35696	0.169	2	0.289	0.98809	0.994	50
393	PHA-00665752	-0.634	1	-0.971	---	---	100
394	oxamic acid	-0.547	1	-0.937	---	---	100
395	5186324	0.556	1	0.929	---	---	100
396	(-)-catechin	-0.482	1	-0.9	---	---	100
397	decitabine	-0.469	1	-0.892	---	---	100
398	BW-B70C	0.494	1	0.888	---	---	100
399	5151277	0.493	1	0.887	---	---	100
400	phenanthridinone	-0.451	1	-0.883	---	---	100
401	U0125	-0.368	1	-0.837	---	---	100
402	exemestane	-0.345	1	-0.827	---	---	100
403	sulindac sulfide	-0.342	1	-0.827	---	---	100
404	2-deoxy-D-glucose	0.402	1	0.825	---	---	100
405	5140203	-0.338	1	-0.824	---	---	100
406	5286656	-0.334	1	-0.823	---	---	100
407	HNMPA-(AM)3	-0.332	1	-0.823	---	---	100
408	N-phenylanthranilic acid	-0.315	1	-0.819	---	---	100
409	5162773	0.386	1	0.816	---	---	100
410	1,5-isoquinolinediol	0	1	-0.794	---	---	0
411	5666823	0.334	1	0.787	---	---	100
412	topiramate	0	1	-0.767	---	---	0
413	MS-275	0	2	0.766	---	---	0
414	12,13-EODE	0	1	-0.758	---	---	0
415	5186223	0	1	-0.74	---	---	0
416	tyrphostin AG-1478	0	1	-0.735	---	---	0
417	cantharidin	0	1	0.729	---	---	0
418	celastrol	0	1	0.728	---	---	0
419	terfenadine	0.196	3	0.713	---	---	33
420	dimethyloxalylglycine	0	1	0.71	---	---	0
421	azacitidine	0	3	0.707	---	---	0
422	sulmazole	0	3	-0.702	---	---	0
423	DL-PPMP	0	1	-0.698	---	---	0
424	ajmaline	0	3	-0.691	---	---	0
425	5149715	0	1	-0.689	---	---	0
426	5109870	0	1	0.684	---	---	0
427	MG-132	0	1	-0.679	---	---	0
428	perhexiline	0	4	0.677	---	---	0
429	bromperidol	0.173	3	0.672	---	---	33
430	iodixanol	-0.215	3	-0.671	---	---	33
431	carbimazole	0	3	-0.67	---	---	0
432	suloctidil	0.125	4	0.668	---	---	25
433	norethisterone	0.096	4	0.664	---	---	25
434	ceforanide	-0.129	4	-0.659	---	---	25
435	splitomicin	0	1	-0.658	---	---	0
436	fenbendazole	0.188	4	0.655	---	---	25
437	idazoxan	-0.083	4	-0.65	---	---	25
438	thapsigargin	0	3	-0.648	---	---	0
439	CP-690334-01	-0.068	8	-0.645	---	---	12
440	promazine	0.141	6	0.644	---	---	33
441	pararosaniline	0	1	0.644	---	---	0
442	Prestwick-691	0	3	-0.643	---	---	0
443	corynanthine	0.211	3	0.642	---	---	33
444	proscillaridin	0.136	3	0.641	---	---	33
445	ivermectin	0.203	5	0.64	---	---	40
446	parthenolide	-0.114	4	-0.639	---	---	25
447	chlorprothixene	0.095	4	0.635	---	---	25
448	benzocaine	-0.158	4	-0.633	---	---	25
449	MK-886	0	2	-0.632	---	---	0
450	camptothecin	0	3	0.631	---	---	0
451	nizatidine	-0.182	4	-0.63	---	---	25
452	5152487	0	1	0.627	---	---	0
453	arachidonic acid	0	3	-0.626	---	---	0
454	helveticoside	0.21	6	0.626	---	---	33
455	Prestwick-857	-0.079	4	-0.623	---	---	25
456	citalopram	-0.072	4	-0.622	---	---	25
457	levodopa	-0.185	5	-0.621	---	---	40
458	lisinopril	0.135	3	0.62	---	---	33
459	SC-58125	-0.122	4	-0.619	---	---	25
460	albendazole	0	3	0.619	---	---	0
461	diflunisal	-0.175	5	-0.618	---	---	40
462	H-7	0	4	0.617	---	---	0
463	digoxin	0.101	4	0.617	---	---	25
464	digoxigenin	0.213	5	0.614	---	---	40
465	5114445	0	1	0.613	---	---	0
466	rottlerin	0	3	0.612	---	---	0
467	aminocaproic acid	-0.148	3	-0.611	---	---	33
468	tioguanine	0	1	-0.611	---	---	0
469	doxorubicin	0	3	0.61	---	---	0
470	propoxycaine	0	4	-0.609	---	---	0
471	cyclopenthiazide	-0.127	4	-0.607	---	---	25
472	pheniramine	-0.128	5	-0.606	---	---	20
473	gefitinib	0	1	0.606	---	---	0
474	nilutamide	0	4	-0.603	---	---	0
475	3-aminobenzamide	0	1	-0.6	---	---	0
476	cefixime	-0.166	4	-0.6	---	---	25
477	ticarcillin	0.087	3	0.6	---	---	33
478	butamben	-0.114	4	-0.598	---	---	25
479	imipramine	0.184	4	0.593	---	---	25
480	ondansetron	-0.099	4	-0.591	---	---	25
481	rilmenidine	-0.109	4	-0.589	---	---	25
482	methocarbamol	-0.202	3	-0.588	---	---	33
483	ramipril	-0.15	4	-0.587	---	---	25
484	oxymetazoline	-0.148	4	-0.586	---	---	25
485	pramocaine	-0.177	5	-0.585	---	---	40
486	metergoline	0.137	4	0.583	---	---	25
487	5194442	-0.106	4	-0.581	---	---	25
488	thiamine	0	3	-0.581	---	---	0
489	risperidone	0.114	3	0.573	---	---	33
490	reserpine	0.121	3	0.573	---	---	33
491	mitoxantrone	0	3	0.573	---	---	0
492	0225151-0000	-0.18	3	-0.57	---	---	33
493	terconazole	0.206	4	0.569	---	---	25
494	phenyl biguanide	0	1	-0.569	---	---	0
495	prednicarbate	0	3	-0.567	---	---	0
496	spaglumic acid	0	2	-0.566	---	---	0
497	blebbistatin	0	2	0.564	---	---	0
498	tyrphostin AG-825	0	1	-0.563	---	---	0
499	astemizole	0.118	5	0.563	---	---	20
500	alcuronium chloride	0	2	-0.563	---	---	0
501	SR-95639A	0	4	-0.562	---	---	0
502	nortriptyline	0.158	4	0.562	---	---	25
503	pimethixene	0.144	3	0.56	---	---	33
504	tomelukast	0	1	-0.558	---	---	0
505	pronetalol	0.151	4	0.554	---	---	25
506	solasodine	-0.079	6	-0.552	---	---	16
507	cyproheptadine	0.107	5	0.549	---	---	20
508	tetracycline	-0.206	5	-0.543	---	---	40
509	prenylamine	0.164	4	0.542	---	---	25
510	cytochalasin B	0	1	-0.541	---	---	0
511	tetracaine	-0.092	3	-0.54	---	---	33
512	Prestwick-559	0	3	0.54	---	---	0
513	5255229	0	2	0.54	---	---	0
514	lomefloxacin	-0.211	6	-0.54	---	---	33
515	harman	-0.094	4	-0.54	---	---	25
516	benserazide	-0.21	5	-0.539	---	---	40
517	bucladesine	0	6	-0.538	---	---	0
518	homatropine	-0.114	5	-0.538	---	---	40
519	BCB000039	-0.301	3	-0.538	---	---	33
520	mebendazole	0	5	0.538	---	---	0
521	gelsemine	0	4	-0.537	---	---	0
522	dopamine	0	1	0.536	---	---	0
523	moxonidine	0	3	0.536	---	---	0
524	bepridil	0	4	0.535	---	---	0
525	dinoprostone	-0.128	4	-0.535	---	---	25
526	GW-8510	0	4	0.534	---	---	0
527	deptropine	0	4	0.533	---	---	0
528	scopoletin	0	2	-0.531	---	---	0
529	niridazole	-0.116	4	-0.531	---	---	25
530	sulfadimethoxine	-0.003	5	-0.529	---	---	20
531	pirinixic acid	-0.095	5	-0.528	---	---	40
532	3-nitropropionic acid	-0.093	4	-0.526	---	---	25
533	clonidine	0.112	4	0.526	---	---	25
534	5213008	0	1	-0.525	---	---	0
535	metanephrine	-0.147	5	-0.523	---	---	40
536	ionomycin	0.202	3	0.523	---	---	33
537	demecolcine	0	1	0.521	---	---	0
538	fisetin	0	1	0.521	---	---	0
539	hydrochlorothiazide	-0.009	5	-0.521	---	---	20
540	primidone	0	4	-0.52	---	---	0
541	flunarizine	0.098	4	0.519	---	---	25
542	trimethobenzamide	0	5	-0.519	---	---	0
543	ergocalciferol	-0.115	4	-0.517	---	---	25
544	hydroxyachillin	-0.131	4	-0.516	---	---	25
545	rifabutin	0	3	0.516	---	---	0
546	hydrocotarnine	0.149	4	0.515	---	---	25
547	alsterpaullone	0	3	0.514	---	---	0
548	dexverapamil	0	1	-0.514	---	---	0
549	rolitetracycline	0.07	4	0.514	---	---	25
550	5248896	0	2	0.513	---	---	0
551	proadifen	0.125	4	0.513	---	---	25
552	5252917	0	2	0.512	---	---	0
553	oligomycin	0	1	-0.512	---	---	0
554	C-75	-0.122	4	-0.511	---	---	25
555	quinostatin	0	2	0.51	---	---	0
556	guanadrel	0.027	5	-0.509	---	---	20
557	betahistine	0	4	0.508	---	---	0
558	depudecin	0	2	0.508	---	---	0
559	cloperastine	0.086	6	0.508	---	---	16
560	aciclovir	0.006	6	-0.507	---	---	16
561	Y-27632	0	2	-0.506	---	---	0
562	homochlorcyclizine	0.172	4	0.506	---	---	25
563	AH-23848	-0.139	3	-0.506	---	---	33
564	milrinone	-0.157	3	-0.505	---	---	33
565	syrosingopine	0	4	0.503	---	---	0
566	calcium folinate	-0.087	5	-0.503	---	---	20
567	niflumic acid	-0.144	4	-0.502	---	---	25
568	methanthelinium bromide	0.003	4	-0.502	---	---	25
569	HC toxin	0	1	-0.501	---	---	0
570	protriptyline	0.114	4	0.501	---	---	25
571	8-azaguanine	0	4	0.501	---	---	0
572	tracazolate	0.1	4	0.501	---	---	25
573	pyrvinium	0.091	6	0.5	---	---	16
574	calmidazolium	0	2	0.5	---	---	0
575	halcinonide	0.108	5	0.5	---	---	20
576	ursodeoxycholic acid	0.115	3	0.5	---	---	33
577	mafenide	-0.095	5	-0.499	---	---	20
578	naproxen	-0.072	9	-0.499	---	---	33
579	PHA-00851261E	-0.089	8	-0.499	---	---	37
580	finasteride	-0.056	6	-0.498	---	---	33
581	sulfanilamide	0	4	-0.497	---	---	0
582	glycopyrronium bromide	-0.096	5	-0.495	---	---	20
583	benfluorex	0.123	4	0.493	---	---	25
584	phenoxybenzamine	0.049	4	0.492	---	---	25
585	dacarbazine	0.131	4	0.491	---	---	25
586	betulinic acid	0.015	4	-0.49	---	---	25
587	dehydrocholic acid	-0.208	5	-0.49	---	---	40
588	Prestwick-675	0.116	4	-0.49	---	---	0
589	econazole	0.172	4	0.489	---	---	25
590	pseudopelletierine	0	4	-0.488	---	---	0
591	adipiodone	0	4	-0.488	---	---	0
592	NS-398	0.169	3	0.487	---	---	33
593	retrorsine	0.178	4	0.487	---	---	25
594	cefadroxil	-0.091	4	-0.486	---	---	25
595	piperine	0	4	-0.485	---	---	0
596	hydrocortisone	0	3	0.484	---	---	0
597	lumicolchicine	0	3	-0.483	---	---	0
598	sulfamerazine	-0.074	5	-0.483	---	---	20
599	epivincamine	0.143	4	0.482	---	---	25
600	molsidomine	-0.115	4	-0.482	---	---	25
601	beta-escin	0.176	6	0.481	---	---	33
602	gabexate	-0.044	4	-0.481	---	---	25
603	triflusal	0	3	0.481	---	---	0
604	cefmetazole	-0.149	4	-0.481	---	---	25
605	ciclopirox	0.176	4	0.481	---	---	25
606	salbutamol	0.162	5	0.48	---	---	40
607	thiamazole	-0.022	6	-0.479	---	---	16
608	naftopidil	0.209	3	0.479	---	---	33
609	serotonin	-0.18	5	-0.478	---	---	40
610	hexestrol	-0.11	4	0.478	---	---	0
611	sulfadoxine	0.143	3	0.478	---	---	33
612	amylocaine	-0.106	5	-0.477	---	---	20
613	bisacodyl	0	4	0.477	---	---	0
614	ifosfamide	0	3	-0.477	---	---	0
615	fluvoxamine	0.124	4	0.477	---	---	25
616	tocainide	-0.044	4	-0.477	---	---	25
617	isoxsuprine	0.232	5	0.476	---	---	40
618	pirlindole	0	3	-0.476	---	---	0
619	ricinine	0.114	4	0.476	---	---	25
620	lansoprazole	-0.022	4	-0.476	---	---	25
621	Prestwick-689	0.155	4	0.475	---	---	25
622	dipivefrine	-0.073	4	-0.475	---	---	25
623	androsterone	0.151	4	0.475	---	---	25
624	pioglitazone	-0.058	11	-0.474	---	---	36
625	ceftazidime	0	3	0.473	---	---	0
626	canrenoic acid	-0.165	4	-0.472	---	---	25
627	scriptaid	0.149	3	0.472	---	---	33
628	scoulerine	0.14	4	0.472	---	---	25
629	riboflavin	0	4	0.471	---	---	0
630	betonicine	-0.091	6	-0.47	---	---	16
631	4,5-dianilinophthalimide	0	2	0.47	---	---	0
632	imidurea	-0.185	3	-0.468	---	---	33
633	niclosamide	0.179	5	0.468	---	---	40
634	mecamylamine	0.161	3	0.466	---	---	33
635	lovastatin	-0.122	4	-0.465	---	---	25
636	canadine	0.008	4	-0.465	---	---	25
637	fipexide	-0.137	3	-0.463	---	---	33
638	tobramycin	0	4	-0.463	---	---	0
639	quinidine	0	3	-0.463	---	---	0
640	carcinine	0.109	4	0.463	---	---	25
641	labetalol	0.109	4	0.46	---	---	25
642	ascorbic acid	0	4	-0.46	---	---	0
643	viomycin	0.137	4	-0.459	---	---	0
644	(+/-)-catechin	0	4	-0.459	---	---	0
645	STOCK1N-28457	-0.159	3	-0.458	---	---	33
646	clomifene	0.18	4	0.458	---	---	25
647	2-aminobenzenesulfonamide	0.026	4	-0.457	---	---	25
648	amiodarone	-0.238	5	-0.457	---	---	40
649	fluocinonide	0.052	5	0.456	---	---	20
650	clomipramine	0	4	0.455	---	---	0
651	aminoglutethimide	0.136	3	0.455	---	---	33
652	glycocholic acid	-0.132	4	-0.454	---	---	25
653	monobenzone	0.051	4	0.452	---	---	25
654	(-)-MK-801	0	4	-0.452	---	---	0
655	difenidol	0	3	0.451	---	---	0
656	clemastine	0	3	-0.45	---	---	0
657	phenazone	0	3	-0.45	---	---	0
658	trimethadione	-0.063	4	-0.449	---	---	25
659	nalbuphine	0.209	5	0.447	---	---	40
660	novobiocin	-0.104	9	-0.447	---	---	33
661	trifluridine	0	4	0.447	---	---	0
662	metitepine	0.094	4	0.446	---	---	25
663	sulfinpyrazone	-0.112	4	-0.446	---	---	25
664	menadione	0	2	0.446	---	---	0
665	troleandomycin	-0.111	4	-0.445	---	---	25
666	terazosin	0.104	4	-0.444	---	---	0
667	dioxybenzone	0.096	4	0.444	---	---	25
668	streptomycin	0	4	-0.444	---	---	0
669	phenylpropanolamine	0.083	4	0.444	---	---	25
670	irinotecan	0	3	0.443	---	---	0
671	dl-alpha tocopherol	0	4	-0.443	---	---	0
672	monocrotaline	-0.118	4	-0.442	---	---	25
673	salsolidin	0.114	4	0.442	---	---	25
674	cinoxacin	0.129	4	0.442	---	---	25
675	sulfachlorpyridazine	-0.168	5	-0.44	---	---	40
676	ipratropium bromide	0	3	0.44	---	---	0
677	sulfafurazole	0	5	-0.44	---	---	0
678	3-acetamidocoumarin	-0.023	4	-0.439	---	---	25
679	trapidil	-0.004	3	-0.439	---	---	33
680	cimetidine	-0.092	5	-0.439	---	---	20
681	Prestwick-692	0.152	4	-0.439	---	---	0
682	prochlorperazine	0.085	16	0.439	---	---	25
683	betaxolol	0.143	4	0.438	---	---	25
684	galantamine	0.167	4	0.437	---	---	25
685	AR-A014418	0.086	3	-0.437	---	---	33
686	acetazolamide	0.197	4	0.436	---	---	25
687	flurbiprofen	0	5	-0.436	---	---	0
688	thioguanosine	0	4	0.436	---	---	0
689	mycophenolic acid	0	3	-0.435	---	---	0
690	ambroxol	0.106	4	-0.435	---	---	0
691	nadolol	0.125	4	-0.435	---	---	0
692	pancuronium bromide	0.129	4	0.434	---	---	25
693	0297417-0002B	0	3	0.434	---	---	0
694	aminohippuric acid	-0.177	4	-0.434	---	---	25
695	aminophenazone	0.037	5	0.432	---	---	40
696	levobunolol	0.073	4	-0.431	---	---	0
697	aztreonam	0.12	5	0.431	---	---	20
698	dapsone	-0.015	5	-0.431	---	---	20
699	cefoperazone	0.171	3	0.431	---	---	33
700	dextromethorphan	-0.158	4	-0.43	---	---	25
701	carteolol	0.036	4	-0.43	---	---	25
702	clotrimazole	0.206	5	0.43	---	---	40
703	tiratricol	0	4	-0.43	---	---	0
704	progesterone	0.103	4	0.429	---	---	25
705	mestranol	-0.024	4	0.428	---	---	25
706	cyclopentolate	0.102	4	0.428	---	---	25
707	pinacidil	-0.091	4	-0.427	---	---	25
708	pyrazinamide	0	4	0.427	---	---	0
709	tetroquinone	-0.119	4	-0.426	---	---	25
710	glipizide	-0.196	5	-0.426	---	---	40
711	cefotiam	-0.027	4	-0.426	---	---	25
712	arcaine	-0.094	4	-0.425	---	---	25
713	oxetacaine	0.194	5	0.424	---	---	40
714	Prestwick-1103	0	4	-0.424	---	---	0
715	fendiline	0.126	3	0.423	---	---	33
716	PF-00539758-00	0.23	3	0.423	---	---	33
717	rotenone	0.075	4	0.422	---	---	25
718	3-acetylcoumarin	-0.089	5	-0.422	---	---	20
719	clioquinol	0.122	5	0.422	---	---	20
720	Prestwick-685	-0.254	5	-0.421	---	---	40
721	beclometasone	0.197	3	0.42	---	---	33
722	rofecoxib	-0.131	6	-0.42	---	---	33
723	Prestwick-983	0.144	3	-0.419	---	---	0
724	sulfamonomethoxine	0	4	-0.419	---	---	25
725	PHA-00745360	-0.043	8	-0.419	---	---	37
726	atovaquone	-0.2	3	-0.418	---	---	33
727	clofilium tosylate	0.183	3	0.418	---	---	33
728	torasemide	0.093	4	0.418	---	---	25
729	alpha-ergocryptine	-0.123	6	-0.417	---	---	33
730	trazodone	0	3	0.415	---	---	0
731	dosulepin	0.156	4	0.415	---	---	25
732	conessine	0.154	4	0.415	---	---	25
733	AG-028671	-0.192	3	-0.414	---	---	33
734	isometheptene	0	4	-0.414	---	---	0
735	drofenine	0.051	4	0.414	---	---	25
736	diperodon	0.064	3	-0.413	---	---	33
737	dexpanthenol	0.133	4	0.412	---	---	25
738	biperiden	0.09	5	-0.412	---	---	0
739	benzamil	-0.113	6	-0.412	---	---	33
740	zaprinast	-0.009	4	-0.412	---	---	25
741	nicotinic acid	0	4	0.411	---	---	0
742	ketanserin	-0.128	4	-0.41	---	---	25
743	norcyclobenzaprine	0	4	0.41	---	---	0
744	bromopride	0	6	-0.41	---	---	0
745	meprylcaine	0	4	-0.409	---	---	0
746	sulindac	-0.127	7	-0.409	---	---	42
747	benzbromarone	-0.16	3	-0.409	---	---	33
748	rescinnamine	0	3	-0.408	---	---	0
749	procyclidine	-0.119	4	-0.408	---	---	25
750	carbarsone	0	4	-0.407	---	---	0
751	flupentixol	0	4	0.407	---	---	0
752	parbendazole	0.115	4	0.407	---	---	25
753	probenecid	0.194	4	0.407	---	---	25
754	cortisone	-0.171	3	-0.406	---	---	33
755	procainamide	0.157	4	0.404	---	---	25
756	eucatropine	-0.192	6	-0.404	---	---	33
757	denatonium benzoate	-0.134	4	-0.404	---	---	25
758	etofylline	0.041	5	0.403	---	---	40
759	enoxacin	-0.108	4	-0.402	---	---	25
760	pyridoxine	-0.115	4	-0.401	---	---	25
761	nystatin	-0.223	3	-0.401	---	---	33
762	carbachol	0.076	4	0.401	---	---	25
763	trimipramine	-0.116	4	-0.401	---	---	25
764	cyclic adenosine monophosphate	-0.001	4	-0.4	---	---	25
765	kawain	0.169	5	0.4	---	---	40
766	cefalexin	-0.221	5	-0.399	---	---	40
767	metamizole sodium	-0.108	6	-0.398	---	---	16
768	piperidolate	0.14	3	0.398	---	---	33
769	azaperone	0.091	4	0.397	---	---	25
770	methylbenzethonium chloride	0.097	6	0.396	---	---	16
771	alvespimycin	0.238	12	0.396	---	---	41
772	indoprofen	0.078	4	-0.396	---	---	25
773	articaine	0.289	3	0.395	---	---	33
774	pirenperone	-0.071	5	-0.395	---	---	40
775	cefotetan	0.041	3	0.395	---	---	33
776	docosahexaenoic acid ethyl ester	0	2	-0.395	---	---	0
777	ampyrone	-0.084	5	-0.394	---	---	40
778	testosterone	-0.012	5	0.394	---	---	20
779	6-azathymine	0.11	4	0.393	---	---	25
780	harmine	-0.14	4	-0.393	---	---	25
781	roxarsone	-0.029	4	0.393	---	---	25
782	ketoconazole	0.128	4	0.392	---	---	25
783	hexamethonium bromide	0.176	5	0.392	---	---	40
784	tyloxapol	-0.126	4	-0.391	---	---	25
785	propofol	-0.105	4	-0.391	---	---	25
786	trichostatin A	0.03	182	0.39	---	---	8
787	flavoxate	0.103	4	0.39	---	---	25
788	mevalolactone	0.188	3	0.39	---	---	33
789	ethambutol	-0.112	5	-0.389	---	---	40
790	felbinac	0.132	4	-0.389	---	---	0
791	crotamiton	0.094	4	0.388	---	---	25
792	monastrol	-0.134	8	-0.386	---	---	37
793	minaprine	-0.132	5	-0.386	---	---	40
794	natamycin	0	4	0.386	---	---	0
795	etomidate	-0.136	3	-0.385	---	---	33
796	mefenamic acid	-0.076	5	-0.385	---	---	40
797	STOCK1N-35215	-0.127	3	-0.385	---	---	33
798	sanguinarine	0	2	0.384	---	---	0
799	Prestwick-1100	0.115	4	0.384	---	---	25
800	liothyronine	0.105	4	0.384	---	---	25
801	gentamicin	0.138	4	-0.384	---	---	0
802	piromidic acid	0.075	4	0.384	---	---	25
803	MG-262	0.16	3	-0.383	---	---	0
804	acepromazine	-0.187	4	-0.381	---	---	25
805	ginkgolide A	0	4	0.38	---	---	0
806	ifenprodil	-0.157	4	0.38	---	---	0
807	Prestwick-860	-0.129	4	-0.379	---	---	25
808	atracurium besilate	0.194	3	-0.379	---	---	0
809	iocetamic acid	0.019	4	-0.379	---	---	25
810	streptozocin	0.129	4	-0.379	---	---	0
811	LM-1685	0.114	3	0.378	---	---	33
812	butoconazole	0.134	4	0.378	---	---	25
813	thiostrepton	-0.127	4	-0.377	---	---	25
814	dilazep	0.009	5	-0.375	---	---	20
815	phensuximide	0.006	4	-0.375	---	---	25
816	SB-202190	-0.086	5	-0.374	---	---	40
817	nitrendipine	0.189	5	0.374	---	---	40
818	suxibuzone	0	4	-0.374	---	---	0
819	sulfapyridine	0	4	0.374	---	---	0
820	cefazolin	-0.136	5	-0.373	---	---	40
821	dihydrostreptomycin	0.108	5	-0.373	---	---	0
822	CP-320650-01	0.008	8	-0.373	---	---	25
823	iproniazid	-0.022	5	-0.372	---	---	40
824	dinoprost	0.121	4	-0.372	---	---	0
825	monorden	0.216	22	0.372	---	---	40
826	furazolidone	-0.07	4	-0.371	---	---	25
827	pentoxifylline	0.2	5	0.371	---	---	40
828	nalidixic acid	-0.119	5	-0.371	---	---	40
829	tetryzoline	0	3	0.371	---	---	0
830	tacrolimus	0.146	3	0.37	---	---	33
831	protoveratrine A	-0.173	4	-0.369	---	---	25
832	loperamide	-0.129	6	-0.369	---	---	33
833	pempidine	0.064	5	0.369	---	---	20
834	capsaicin	0.092	4	0.369	---	---	25
835	AG-012559	0.043	3	-0.368	---	---	33
836	adrenosterone	-0.036	4	0.368	---	---	25
837	chloropyramine	0.119	4	0.367	---	---	25
838	7-aminocephalosporanic acid	0.094	4	0.367	---	---	25
839	tomatidine	0.121	4	0.366	---	---	25
840	flunixin	-0.036	5	0.366	---	---	40
841	etanidazole	-0.103	4	-0.365	---	---	25
842	moroxydine	0.167	5	0.365	---	---	40
843	amikacin	0.14	4	0.365	---	---	25
844	ouabain	0	4	0.365	---	---	0
845	tenoxicam	0.021	4	-0.364	---	---	25
846	chlorambucil	-0.002	4	-0.364	---	---	25
847	promethazine	0.052	4	0.363	---	---	25
848	ethoxyquin	0.171	5	0.363	---	---	40
849	scopolamine N-oxide	-0.26	5	-0.363	---	---	40
850	demecarium bromide	0.114	4	-0.363	---	---	0
851	etidronic acid	-0.154	4	-0.363	---	---	25
852	nifenazone	-0.062	5	-0.362	---	---	40
853	trimetazidine	-0.109	4	-0.362	---	---	25
854	anabasine	0	3	-0.362	---	---	0
855	papaverine	-0.157	4	-0.362	---	---	25
856	metacycline	0	4	0.361	---	---	0
857	colforsin	-0.091	5	-0.361	---	---	20
858	melatonin	0.142	4	-0.361	---	---	0
859	velnacrine	0	4	-0.361	---	---	0
860	ticlopidine	-0.18	5	-0.359	---	---	40
861	diphemanil metilsulfate	0.122	5	-0.359	---	---	20
862	amoxapine	0.016	5	0.359	---	---	40
863	fenbufen	-0.104	6	-0.359	---	---	33
864	triamcinolone	0.143	5	0.358	---	---	20
865	trifluoperazine	0.068	16	0.358	---	---	12
866	pimozide	-0.143	4	-0.358	---	---	25
867	metronidazole	-0.064	5	-0.358	---	---	40
868	bethanechol	0.174	4	0.358	---	---	25
869	sulfabenzamide	0.074	4	-0.357	---	---	0
870	alfaxalone	-0.154	3	-0.356	---	---	33
871	clemizole	-0.243	5	-0.355	---	---	40
872	ranitidine	-0.227	5	-0.355	---	---	40
873	moracizine	-0.117	4	-0.355	---	---	25
874	butacaine	0.095	4	0.354	---	---	25
875	fluvastatin	-0.103	4	-0.354	---	---	25
876	xamoterol	0.12	3	0.354	---	---	33
877	thalidomide	-0.247	7	-0.354	---	---	42
878	carbinoxamine	0	4	0.354	---	---	0
879	thioridazine	0.033	20	0.353	---	---	10
880	palmatine	-0.097	4	-0.352	---	---	25
881	demeclocycline	-0.202	6	-0.351	---	---	33
882	hesperetin	-0.006	5	0.35	---	---	20
883	mepacrine	0	2	-0.35	---	---	0
884	phenazopyridine	-0.111	4	-0.35	---	---	25
885	Prestwick-664	0	6	-0.35	---	---	0
886	doxepin	-0.016	3	0.35	---	---	33
887	pralidoxime	0.078	4	-0.349	---	---	0
888	naringin	-0.097	4	-0.349	---	---	25
889	pyrantel	-0.234	5	-0.348	---	---	40
890	sulfaguanidine	-0.155	5	-0.348	---	---	40
891	droperidol	0.131	4	0.347	---	---	25
892	mifepristone	-0.114	4	-0.347	---	---	25
893	tranylcypromine	-0.232	5	-0.346	---	---	40
894	(-)-isoprenaline	-0.102	4	-0.346	---	---	25
895	tiabendazole	-0.061	4	-0.346	---	---	25
896	mephenesin	-0.068	5	-0.346	---	---	20
897	thioproperazine	-0.156	5	-0.345	---	---	40
898	meticrane	-0.245	5	-0.345	---	---	40
899	sodium phenylbutyrate	0.11	7	0.345	---	---	42
900	5707885	0.028	4	-0.344	---	---	25
901	Prestwick-674	-0.037	6	0.344	---	---	16
902	piretanide	0.186	4	0.344	---	---	25
903	monensin	0.097	6	-0.344	---	---	16
904	napelline	0.017	4	0.344	---	---	25
905	lidoflazine	0.132	3	0.344	---	---	33
906	felodipine	0	7	0.344	---	---	0
907	heptaminol	0.283	5	0.344	---	---	40
908	gallamine triethiodide	0.124	5	0.343	---	---	40
909	gibberellic acid	0	4	-0.343	---	---	0
910	tolbutamide	-0.066	7	-0.342	---	---	28
911	N-acetylmuramic acid	0.061	4	-0.342	---	---	25
912	raloxifene	-0.116	7	-0.342	---	---	28
913	resveratrol	-0.107	9	-0.342	---	---	22
914	bupivacaine	0.093	4	0.341	---	---	25
915	SB-203580	0.019	5	-0.341	---	---	20
916	thiamphenicol	0.224	5	0.341	---	---	40
917	bufexamac	0.006	4	-0.341	---	---	25
918	CP-319743	0.127	4	0.34	---	---	25
919	ebselen	-0.18	3	0.34	---	---	0
920	bisoprolol	0	4	-0.34	---	---	0
921	oxytetracycline	-0.128	3	-0.34	---	---	33
922	nordihydroguaiaretic acid	0.123	15	0.34	---	---	26
923	brompheniramine	0.196	4	0.34	---	---	25
924	pipenzolate bromide	0	4	-0.339	---	---	0
925	colecalciferol	0.092	4	0.339	---	---	25
926	quipazine	0.02	4	-0.339	---	---	25
927	ketorolac	-0.05	4	0.338	---	---	25
928	R-atenolol	-0.149	4	-0.338	---	---	25
929	yohimbic acid	0.17	3	-0.338	---	---	0
930	16,16-dimethylprostaglandin E2	0.197	3	0.338	---	---	33
931	clopamide	0.148	4	-0.338	---	---	0
932	apomorphine	0.011	5	0.338	---	---	40
933	meclozine	-0.071	5	-0.338	---	---	20
934	fenofibrate	0.176	3	0.337	---	---	33
935	Prestwick-1083	0	3	0.337	---	---	0
936	trimethoprim	0.222	5	0.337	---	---	40
937	alclometasone	-0.121	4	-0.336	---	---	25
938	dequalinium chloride	-0.061	4	0.336	---	---	25
939	adenosine phosphate	0.175	4	0.336	---	---	25
940	iloprost	0.258	3	0.335	---	---	33
941	isoniazid	0.106	5	-0.335	---	---	20
942	AG-013608	-0.106	8	-0.335	---	---	37
943	propafenone	-0.134	4	-0.335	---	---	25
944	hyoscyamine	0.001	5	0.335	---	---	40
945	doxylamine	0.166	5	0.334	---	---	40
946	nifedipine	0.069	7	0.334	---	---	28
947	N-acetyl-L-leucine	-0.075	4	-0.333	---	---	25
948	pepstatin	0.025	4	-0.333	---	---	25
949	dicloxacillin	0.096	4	0.332	---	---	25
950	dienestrol	0.203	3	0.331	---	---	33
951	spironolactone	-0.076	5	-0.33	---	---	40
952	geldanamycin	0.239	15	0.33	---	---	46
953	Prestwick-972	0.135	3	0.33	---	---	33
954	adiphenine	0.248	5	0.329	---	---	40
955	0317956-0000	0.02	8	-0.329	---	---	25
956	piperacetazine	-0.092	4	-0.329	---	---	25
957	selegiline	0.042	4	-0.328	---	---	25
958	trioxysalen	-0.13	4	-0.328	---	---	25
959	chlorpromazine	0.087	19	0.328	---	---	15
960	mefloquine	-0.107	5	0.327	---	---	0
961	cefoxitin	0.02	4	-0.327	---	---	25
962	pyrimethamine	0.211	5	0.327	---	---	40
963	phenformin	0.123	7	0.326	---	---	42
964	heliotrine	-0.122	6	-0.326	---	---	33
965	SR-95531	0.08	4	-0.326	---	---	25
966	prednisolone	0.136	5	0.326	---	---	40
967	rimexolone	-0.146	4	-0.325	---	---	25
968	meclofenamic acid	0.172	5	0.324	---	---	40
969	profenamine	0	4	0.324	---	---	0
970	ozagrel	-0.13	4	-0.324	---	---	25
971	pipemidic acid	0	3	-0.323	---	---	0
972	amprolium	0.106	5	0.322	---	---	20
973	PHA-00846566E	0.124	3	0.321	---	---	33
974	berberine	-0.125	4	-0.321	---	---	25
975	mebhydrolin	0.184	4	-0.321	---	---	0
976	ioversol	-0.013	4	0.321	---	---	25
977	metyrapone	0.017	4	0.32	---	---	25
978	PHA-00767505E	-0.004	4	-0.32	---	---	25
979	Gly-His-Lys	0.101	3	-0.32	---	---	33
980	proguanil	0.19	3	0.32	---	---	33
981	etoposide	0	4	-0.32	---	---	0
982	isopropamide iodide	-0.128	4	-0.32	---	---	25
983	delsoline	-0.022	4	0.318	---	---	25
984	levcycloserine	0.016	4	-0.317	---	---	25
985	baclofen	-0.18	5	-0.316	---	---	40
986	tiapride	0.051	5	0.316	---	---	40
987	atropine oxide	0.07	5	0.316	---	---	40
988	sulpiride	-0.084	5	-0.316	---	---	40
989	skimmianine	-0.101	4	0.315	---	---	0
990	triamterene	0.165	5	0.315	---	---	40
991	xylazine	-0.075	4	-0.315	---	---	25
992	carmustine	0.227	3	0.314	---	---	33
993	sulfaquinoxaline	0.165	3	0.313	---	---	33
994	dirithromycin	0.097	3	0.313	---	---	33
995	probucol	0.154	6	0.313	---	---	33
996	Chicago Sky Blue 6B	0.122	4	-0.312	---	---	0
997	4-hydroxyphenazone	0.157	5	0.312	---	---	40
998	diphenhydramine	0.074	5	-0.312	---	---	20
999	celecoxib	-0.032	5	-0.312	---	---	40
1000	F0447-0125	0.108	4	-0.312	---	---	0
1001	talampicillin	0.122	4	0.312	---	---	25
1002	eldeline	-0.094	6	-0.311	---	---	16
1003	prasterone	0.098	4	0.311	---	---	25
1004	diclofenac	-0.127	5	-0.311	---	---	40
1005	cinchonidine	0.107	4	0.31	---	---	25
1006	butyl hydroxybenzoate	0.065	5	0.309	---	---	40
1007	gossypol	0.165	6	0.309	---	---	33
1008	sulfadiazine	0.038	5	0.308	---	---	40
1009	sulfamethoxazole	0.005	5	0.308	---	---	20
1010	tetramisole	0.137	4	0.308	---	---	25
1011	benfotiamine	-0.115	5	-0.307	---	---	20
1012	coralyne	0.001	4	0.307	---	---	25
1013	guanfacine	0.03	5	0.306	---	---	20
1014	dexpropranolol	-0.17	3	-0.306	---	---	33
1015	cefaclor	-0.08	4	-0.306	---	---	25
1016	propantheline bromide	-0.12	4	-0.305	---	---	25
1017	benzethonium chloride	0	3	-0.305	---	---	0
1018	puromycin	-0.061	4	-0.305	---	---	25
1019	ethionamide	0.149	3	0.305	---	---	33
1020	moxisylyte	0.242	5	0.305	---	---	40
1021	acetohexamide	-0.033	4	-0.305	---	---	25
1022	mianserin	0.141	5	0.304	---	---	40
1023	dipyridamole	-0.19	6	-0.303	---	---	33
1024	propranolol	-0.008	4	-0.303	---	---	25
1025	tretinoin	-0.208	22	-0.303	---	---	45
1026	betazole	-0.097	5	-0.302	---	---	40
1027	flucytosine	0.149	4	0.302	---	---	25
1028	paromomycin	0.129	4	-0.302	---	---	0
1029	0179445-0000	0.058	8	0.302	---	---	37
1030	amitriptyline	0.255	6	0.302	---	---	33
1031	todralazine	-0.089	5	-0.301	---	---	20
1032	mephenytoin	0.149	4	-0.3	---	---	0
1033	medrysone	-0.216	6	-0.3	---	---	33
1034	BCB000038	0.023	4	-0.299	---	---	25
1035	pentamidine	-0.005	5	0.298	---	---	20
1036	vitexin	-0.023	4	-0.298	---	---	25
1037	methotrexate	-0.124	8	-0.298	---	---	25
1038	acemetacin	0.139	4	-0.298	---	---	0
1039	sertaconazole	-0.129	4	-0.297	---	---	25
1040	10-methoxyharmalan	0.059	4	-0.297	---	---	25
1041	cefalonium	0.205	3	0.297	---	---	33
1042	isoetarine	-0.109	4	-0.297	---	---	25
1043	isradipine	0	4	-0.297	---	---	0
1044	benzydamine	-0.045	4	0.296	---	---	25
1045	glimepiride	0.128	4	-0.296	---	---	0
1046	nomegestrol	0.189	3	0.296	---	---	33
1047	kanamycin	0.004	4	-0.296	---	---	25
1048	etynodiol	0.001	4	-0.295	---	---	25
1049	pridinol	-0.007	4	0.295	---	---	25
1050	tolmetin	-0.12	4	-0.295	---	---	25
1051	cyproterone	-0.124	4	-0.294	---	---	25
1052	enilconazole	0.079	4	0.294	---	---	25
1053	amphotericin B	0.084	4	-0.294	---	---	0
1054	proxymetacaine	-0.164	4	-0.294	---	---	25
1055	hymecromone	0.1	4	-0.293	---	---	0
1056	fluspirilene	-0.091	4	-0.293	---	---	25
1057	ciclosporin	0.216	6	0.293	---	---	33
1058	bumetanide	0.015	4	-0.292	---	---	25
1059	diprophylline	0.173	5	-0.291	---	---	0
1060	sparteine	0.104	4	0.291	---	---	25
1061	L-methionine sulfoximine	0.16	4	0.291	---	---	25
1062	mepyramine	0.114	4	0.291	---	---	25
1063	pargyline	-0.119	4	-0.291	---	---	25
1064	abamectin	-0.131	4	-0.29	---	---	25
1065	hexylcaine	0.128	4	-0.29	---	---	0
1066	gemfibrozil	-0.096	5	-0.29	---	---	40
1067	corticosterone	0.151	4	0.289	---	---	25
1068	omeprazole	-0.097	4	-0.289	---	---	25
1069	sulfamethoxypyridazine	-0.199	5	-0.289	---	---	40
1070	latamoxef	-0.197	3	-0.288	---	---	33
1071	metampicillin	0.23	5	0.288	---	---	40
1072	etiocholanolone	0.094	6	-0.288	---	---	16
1073	etamsylate	-0.128	4	-0.288	---	---	25
1074	oxolamine	0.117	4	0.288	---	---	25
1075	ribostamycin	-0.148	4	-0.288	---	---	25
1076	lobeline	0.131	4	0.287	---	---	25
1077	isoconazole	-0.139	5	-0.287	---	---	40
1078	clozapine	-0.067	17	-0.286	---	---	23
1079	apigenin	-0.155	4	-0.286	---	---	25
1080	lidocaine	-0.095	5	-0.286	---	---	40
1081	phthalylsulfathiazole	-0.13	5	-0.285	---	---	20
1082	naloxone	-0.131	6	-0.284	---	---	33
1083	budesonide	0	4	-0.284	---	---	0
1084	betamethasone	0.197	3	0.284	---	---	33
1085	tonzonium bromide	-0.106	4	-0.284	---	---	25
1086	ritodrine	0.073	4	0.284	---	---	25
1087	methacholine chloride	-0.098	3	-0.284	---	---	33
1088	chloroquine	-0.01	4	-0.283	---	---	25
1089	desoxycortone	-0.1	4	-0.283	---	---	25
1090	carisoprodol	0.096	4	-0.282	---	---	25
1091	naftifine	0.051	4	-0.282	---	---	25
1092	paracetamol	-0.052	4	0.282	---	---	25
1093	mephentermine	0.072	5	0.281	---	---	20
1094	doxycycline	0.052	5	-0.281	---	---	20
1095	nitrofurantoin	0	5	0.281	---	---	0
1096	levonorgestrel	-0.161	6	-0.28	---	---	33
1097	boldine	0.011	4	-0.28	---	---	25
1098	methyldopate	0	4	-0.28	---	---	0
1099	butirosin	-0.089	4	0.28	---	---	25
1100	alverine	0	4	0.28	---	---	0
1101	amoxicillin	-0.153	4	-0.279	---	---	25
1102	fluorocurarine	0.016	4	0.279	---	---	25
1103	genistein	0.016	17	-0.279	---	---	17
1104	H-89	-0.041	3	-0.279	---	---	33
1105	chlorcyclizine	0.017	6	-0.278	---	---	16
1106	Prestwick-984	0.068	4	-0.278	---	---	25
1107	Trolox C	0.118	4	0.278	---	---	25
1108	BAS-012416453	0.084	3	0.278	---	---	33
1109	troglitazone	-0.037	16	-0.278	---	---	12
1110	riluzole	0.115	5	0.277	---	---	40
1111	hydroflumethiazide	-0.033	5	-0.277	---	---	40
1112	glafenine	0	4	0.277	---	---	0
1113	pentetrazol	0.159	4	0.276	---	---	25
1114	azacyclonol	0.102	5	0.276	---	---	40
1115	lanatoside C	0.054	6	0.276	---	---	16
1116	morantel	-0.193	5	-0.276	---	---	40
1117	cefsulodin	-0.041	4	-0.275	---	---	25
1118	bromocriptine	-0.198	5	-0.275	---	---	40
1119	bergenin	0.114	4	0.275	---	---	25
1120	fenoterol	-0.186	3	-0.275	---	---	33
1121	sotalol	0	4	-0.275	---	---	0
1122	diethylcarbamazine	0.003	4	0.274	---	---	25
1123	pirenzepine	-0.045	5	0.274	---	---	20
1124	vanoxerine	-0.083	4	-0.274	---	---	25
1125	betulin	0.109	3	-0.273	---	---	0
1126	mepenzolate bromide	0.051	5	-0.273	---	---	0
1127	erythromycin	-0.01	5	0.272	---	---	40
1128	scopolamine	-0.137	4	-0.272	---	---	25
1129	dihydroergotamine	-0.065	5	-0.272	---	---	40
1130	apramycin	0.01	4	0.272	---	---	25
1131	piperacillin	0.001	5	-0.272	---	---	40
1132	diazoxide	0.042	5	0.272	---	---	40
1133	vorinostat	-0.133	12	0.271	---	---	0
1134	0175029-0000	-0.084	6	-0.271	---	---	16
1135	thioperamide	0.105	5	0.27	---	---	40
1136	dantrolene	0.015	6	-0.27	---	---	16
1137	digitoxigenin	-0.11	4	-0.269	---	---	25
1138	vidarabine	0	4	-0.269	---	---	0
1139	isotretinoin	-0.015	4	-0.268	---	---	25
1140	sirolimus	-0.068	44	-0.267	---	---	13
1141	etofenamate	-0.06	4	0.266	---	---	25
1142	naphazoline	0.01	5	-0.265	---	---	20
1143	guanethidine	-0.045	3	-0.264	---	---	33
1144	decamethonium bromide	-0.056	4	-0.264	---	---	25
1145	epirizole	-0.056	5	-0.264	---	---	40
1146	norfloxacin	-0.119	5	0.264	---	---	20
1147	nomifensine	0.111	5	0.263	---	---	40
1148	iohexol	0.113	4	0.263	---	---	25
1149	lactobionic acid	0.075	4	0.263	---	---	25
1150	dicoumarol	0.038	6	0.262	---	---	33
1151	oxolinic acid	-0.042	5	-0.262	---	---	20
1152	ellipticine	-0.129	4	0.261	---	---	0
1153	harpagoside	-0.066	4	-0.261	---	---	25
1154	antimycin A	-0.06	5	0.261	---	---	20
1155	rosiglitazone	-0.014	14	-0.261	---	---	14
1156	isocarboxazid	0.093	5	0.261	---	---	20
1157	oxybutynin	-0.073	4	-0.26	---	---	25
1158	sitosterol	0	4	0.26	---	---	25
1159	prednisone	0.222	5	0.259	---	---	40
1160	sulfathiazole	0.109	5	0.259	---	---	40
1161	mesalazine	0.089	5	0.259	---	---	20
1162	nicergoline	0.063	5	0.258	---	---	20
1163	acebutolol	0.115	5	0.258	---	---	40
1164	glibenclamide	-0.113	4	0.258	---	---	25
1165	bacampicillin	0.083	4	0.257	---	---	25
1166	nabumetone	-0.158	4	-0.256	---	---	25
1167	tetraethylenepentamine	0.01	6	-0.256	---	---	16
1168	cefotaxime	0.028	5	-0.256	---	---	20
1169	sulfasalazine	0.125	5	0.256	---	---	20
1170	hydroxyzine	0.066	5	0.256	---	---	40
1171	cefalotin	-0.085	4	-0.256	---	---	25
1172	chlortalidone	0.154	4	0.256	---	---	25
1173	CP-645525-01	-0.037	3	-0.254	---	---	33
1174	tolnaftate	0.07	5	-0.254	---	---	20
1175	ornidazole	-0.085	5	-0.253	---	---	40
1176	sulconazole	-0.16	4	-0.253	---	---	25
1177	dihydroergocristine	0.086	4	0.253	---	---	25
1178	chrysin	-0.133	3	-0.253	---	---	33
1179	0173570-0000	-0.079	6	-0.252	---	---	33
1180	pergolide	0.054	4	0.252	---	---	25
1181	orlistat	-0.107	5	-0.252	---	---	40
1182	oxybuprocaine	0.146	4	0.252	---	---	25
1183	lorglumide	-0.122	5	-0.252	---	---	40
1184	domperidone	0.152	4	0.251	---	---	25
1185	dropropizine	0.13	4	0.251	---	---	25
1186	carbamazepine	-0.136	8	-0.251	---	---	37
1187	pentolonium	-0.051	5	-0.25	---	---	40
1188	cetirizine	-0.101	4	-0.25	---	---	25
1189	daunorubicin	-0.25	4	-0.25	---	---	25
1190	josamycin	-0.121	5	-0.25	---	---	40
1191	tremorine	-0.059	4	-0.25	---	---	25
1192	urapidil	-0.081	4	0.25	---	---	25
1193	sulfadimidine	0.127	6	0.249	---	---	33
1194	tolazoline	0.035	5	0.249	---	---	40
1195	primaquine	-0.128	4	-0.249	---	---	25
1196	hydrastine hydrochloride	-0.013	4	-0.248	---	---	25
1197	zomepirac	-0.064	4	0.248	---	---	25
1198	tranexamic acid	0.093	5	-0.248	---	---	0
1199	bambuterol	0.015	4	0.247	---	---	25
1200	succinylsulfathiazole	-0.114	4	-0.247	---	---	25
1201	gramine	0.124	4	-0.246	---	---	0
1202	citiolone	-0.033	6	-0.246	---	---	16
1203	fursultiamine	0.022	4	-0.246	---	---	25
1204	noscapine	0.007	4	-0.246	---	---	25
1205	dimethadione	0.022	4	0.245	---	---	25
1206	iopanoic acid	0.011	4	0.245	---	---	25
1207	tamoxifen	-0.09	7	-0.244	---	---	42
1208	famprofazone	-0.171	6	-0.244	---	---	33
1209	methylprednisolone	0.009	4	-0.243	---	---	25
1210	calcium pantothenate	-0.075	4	-0.243	---	---	25
1211	acacetin	0.056	6	0.243	---	---	33
1212	oleandomycin	-0.031	5	-0.243	---	---	20
1213	fusidic acid	0.072	4	0.243	---	---	25
1214	acenocoumarol	0.038	5	-0.242	---	---	40
1215	cefuroxime	-0.016	4	-0.242	---	---	25
1216	fluphenazine	-0.041	18	0.241	---	---	16
1217	telenzepine	-0.163	4	-0.24	---	---	25
1218	pentetic acid	0.118	5	0.24	---	---	20
1219	memantine	0.084	4	0.24	---	---	25
1220	Prestwick-864	0.117	4	-0.239	---	---	0
1221	chlorogenic acid	0.162	4	0.24	---	---	25
1222	benzthiazide	0.116	4	0.239	---	---	25
1223	ethisterone	0.129	6	0.238	---	---	33
1224	nicardipine	0.058	4	0.238	---	---	25
1225	alexidine	0	4	-0.237	---	---	0
1226	ciprofibrate	0.142	4	-0.237	---	---	0
1227	vinpocetine	0.108	4	0.236	---	---	25
1228	fluorometholone	0.004	4	0.236	---	---	25
1229	merbromin	0.16	5	-0.234	---	---	0
1230	etifenin	-0.062	4	-0.233	---	---	25
1231	etamivan	0.09	4	0.232	---	---	25
1232	cyanocobalamin	-0.07	4	-0.231	---	---	25
1233	benzathine benzylpenicillin	0.155	4	0.231	---	---	25
1234	lithocholic acid	0.039	6	-0.231	---	---	16
1235	lisuride	0.192	5	0.23	---	---	40
1236	edrophonium chloride	0.016	5	0.229	---	---	20
1237	amrinone	-0.081	4	-0.227	---	---	25
1238	netilmicin	0.115	4	0.227	---	---	25
1239	methoxamine	0.072	4	0.227	---	---	25
1240	PF-01378883-00	-0.058	4	-0.226	---	---	25
1241	famotidine	-0.032	5	-0.224	---	---	20
1242	clenbuterol	-0.011	5	-0.223	---	---	20
1243	metoclopramide	-0.013	6	0.222	---	---	33
1244	PNU-0251126	0.026	6	-0.222	---	---	16
1245	(+)-isoprenaline	0.007	4	0.221	---	---	25
1246	fludrocortisone	0.175	8	-0.221	---	---	0
1247	furaltadone	-0.065	6	-0.22	---	---	33
1248	ketoprofen	-0.034	6	0.219	---	---	33
1249	chlorzoxazone	-0.027	4	-0.218	---	---	25
1250	nadide	0.098	4	-0.218	---	---	0
1251	estrone	0.146	4	0.218	---	---	25
1252	lynestrenol	0.031	5	-0.217	---	---	20
1253	atractyloside	0.161	5	0.217	---	---	40
1254	neomycin	0.03	5	0.217	---	---	20
1255	paclitaxel	0.095	6	-0.216	---	---	16
1256	co-dergocrine mesilate	0	4	0.213	---	---	25
1257	propylthiouracil	0.005	4	0.213	---	---	25
1258	simvastatin	-0.016	4	-0.212	---	---	25
1259	dexamethasone	0.152	8	0.21	---	---	37
1260	mefexamide	0.01	4	0.21	---	---	25
1261	estradiol	0.124	37	0.209	---	---	40
1262	alprostadil	0.103	7	-0.208	---	---	14
1263	salsolinol	0.018	3	-0.208	---	---	33
1264	tropicamide	-0.013	6	0.208	---	---	16
1265	acetylsalicylic acid	0.096	13	0.206	---	---	23
1266	bemegride	-0.045	4	-0.206	---	---	25
1267	cyclizine	-0.044	4	-0.204	---	---	25
1268	octopamine	0.016	4	0.204	---	---	25
1269	griseofulvin	0.135	5	0.203	---	---	40
1270	flunisolide	0.053	6	0.201	---	---	33
1271	ethosuximide	-0.02	4	-0.201	---	---	25
1272	6-benzylaminopurine	0.013	5	0.201	---	---	20
1273	methyldopa	-0.012	5	-0.2	---	---	20
1274	benzylpenicillin	0	4	-0.199	---	---	25
1275	lysergol	-0.014	4	0.199	---	---	25
1276	phentolamine	0.019	7	-0.199	---	---	14
1277	dizocilpine	0.084	5	0.199	---	---	20
1278	halofantrine	0.145	3	0.196	---	---	33
1279	indometacin	-0.06	8	-0.196	---	---	25
1280	methazolamide	-0.028	4	-0.196	---	---	25
1281	cefapirin	-0.025	4	-0.194	---	---	25
1282	ikarugamycin	0.019	3	0.193	---	---	33
1283	erastin	0.022	4	0.188	---	---	25
1284	isocorydine	0.025	4	-0.187	---	---	25
1285	valproic acid	0.04	57	0.186	---	---	22
1286	azathioprine	-0.03	7	-0.186	---	---	28
1287	metaraminol	-0.008	4	-0.185	---	---	25
1288	myosmine	0.117	6	0.185	---	---	33
1289	diclofenamide	0.028	4	0.184	---	---	25
1290	indapamide	0.029	6	-0.182	---	---	16
1291	stachydrine	-0.009	4	-0.182	---	---	25
1292	phenelzine	0.016	6	-0.18	---	---	16
1293	N6-methyladenosine	0.043	4	0.18	---	---	25
1294	prazosin	0.039	6	0.178	---	---	16
1295	imipenem	-0.021	4	-0.175	---	---	25
1296	enalapril	-0.002	4	-0.175	---	---	25
1297	alpha-estradiol	-0.017	16	0.174	---	---	18
1298	prilocaine	-0.042	6	-0.174	---	---	33
1299	metrifonate	-0.005	5	-0.173	---	---	20
1300	verapamil	-0.001	6	-0.173	---	---	33
1301	diphenylpyraline	0.061	6	-0.172	---	---	16
1302	nimodipine	-0.006	4	0.172	---	---	25
1303	terguride	0.068	8	0.167	---	---	25
1304	esculin	0.013	4	0.166	---	---	25
1305	PF-00562151-00	0.005	8	-0.16	---	---	25
1306	fulvestrant	0.05	40	0.153	---	---	27
1307	miconazole	0.032	5	0.148	---	---	20
1308	altizide	-0.002	4	-0.144	---	---	25
1309	haloperidol	0.079	32	0.118	---	---	25

## Sheet: by cmap name and cell line
rank	cmap name and cell line	mean	n	enrichment	p	specificity	percent non-null
1	6-bromoindirubin-3'-oxime - PC3	-0.654	4	-0.95	0	0	100
2	15-delta prostaglandin J2 - MCF7	0.477	8	0.815	0	0.0359	100
3	LY-294002 - MCF7	-0.358	34	-0.548	0	0.0625	70
4	tanespimycin - MCF7	0.327	36	0.526	0	0.1211	66
5	tanespimycin - PC3	0.355	12	0.609	8e-05	0.0739	83
6	wortmannin - MCF7	-0.408	10	-0.622	0.00024	0.1487	80
7	LY-294002 - PC3	-0.416	12	-0.554	0.00064	0.1302	66
8	lycorine - MCF7	0.591	3	0.922	0.00104	0.0131	100
9	fulvestrant - PC3	0.308	12	0.522	0.00132	0.0385	75
10	fenbufen - PC3	-0.685	2	-0.974	0.00139	0.0055	100
11	amitriptyline - PC3	0.764	2	0.968	0.00173	0.0099	100
12	diethylstilbestrol - MCF7	0.612	3	0.906	0.00174	0.0425	100
13	guaifenesin - PC3	-0.65	2	-0.97	0.00177	0	100
14	orphenadrine - PC3	0.644	2	0.967	0.00185	0.0055	100
15	medrysone - PC3	-0.647	2	-0.966	0.00251	0.005	100
16	wortmannin - HL60	-0.395	4	-0.801	0.00306	0.0255	75
17	vorinostat - HL60	-0.533	3	-0.883	0.00318	0.0909	100
18	scopolamine N-oxide - PC3	-0.65	2	-0.961	0.00342	0	100
19	helveticoside - PC3	0.631	2	0.955	0.0035	0.0468	100
20	ticlopidine - PC3	-0.616	2	-0.959	0.00364	0.0054	100
21	troglitazone - PC3	-0.256	4	-0.792	0.00376	0.0488	50
22	equilin - MCF7	0.552	3	0.87	0.00407	0.0216	100
23	perphenazine - MCF7	0.651	2	0.952	0.00416	0.0051	100
24	metolazone - PC3	-0.64	2	-0.954	0.00441	0.01	100
25	dyclonine - MCF7	0.602	2	0.951	0.00447	0.0099	100
26	Prestwick-685 - PC3	-0.636	2	-0.953	0.00453	0.005	100
27	isoxicam - PC3	0.653	2	0.95	0.00465	0.0056	100
28	naloxone - PC3	-0.619	2	-0.951	0.00525	0	100
29	CP-944629 - PC3	-0.627	2	-0.95	0.00547	0.0102	100
30	cephaeline - MCF7	-0.509	3	-0.86	0.00555	0.1657	100
31	pyrantel - PC3	-0.585	2	-0.949	0.00579	0.0144	100
32	levonorgestrel - PC3	-0.64	2	-0.947	0.00612	0.0055	100
33	tranylcypromine - PC3	-0.58	2	-0.946	0.00626	0.0051	100
34	meticrane - PC3	-0.613	2	-0.945	0.00664	0.0188	100
35	thiamphenicol - PC3	0.745	2	0.941	0.0067	0.0219	100
36	minaprine - PC3	-0.611	2	-0.943	0.00698	0.0044	100
37	tinidazole - PC3	-0.598	2	-0.942	0.00728	0.0054	100
38	thalidomide - PC3	-0.634	2	-0.941	0.0074	0.0099	100
39	cinchocaine - PC3	-0.56	2	-0.94	0.00765	0.01	100
40	dexamethasone - PC3	0.575	2	0.937	0.00765	0.0444	100
41	verteporfin - MCF7	-0.559	2	-0.939	0.00779	0.0405	100
42	lomefloxacin - PC3	-0.634	2	-0.937	0.00847	0.0166	100
43	fenoprofen - PC3	-0.607	2	-0.936	0.00869	0.0051	100
44	Prestwick-665 - PC3	-0.555	2	-0.935	0.00871	0.0105	100
45	cotinine - PC3	-0.58	2	-0.934	0.00919	0.0142	100
46	nefopam - MCF7	0.447	3	0.832	0.00949	0.0127	100
47	adiphenine - PC3	0.62	2	0.929	0.00952	0.057	100
48	meclofenamic acid - PC3	0.61	2	0.924	0.01107	0.0216	100
49	cefazolin - PC3	-0.541	2	-0.926	0.01135	0	100
50	5224221 - MCF7	0.577	2	0.922	0.01185	0.2179	100
51	emetine - MCF7	-0.601	2	-0.921	0.01255	0.1056	100
52	15(S)-15-methylprostaglandin E2 - PC3	0.562	2	0.92	0.0127	0.0579	100
53	disopyramide - MCF7	-0.539	2	-0.92	0.01292	0.0745	100
54	dipyridamole - PC3	-0.57	2	-0.919	0.01318	0.0056	100
55	procaine - PC3	-0.662	2	-0.918	0.01354	0.0196	100
56	foliosidine - MCF7	-0.278	3	-0.809	0.014	0.017	100
57	baclofen - PC3	-0.621	2	-0.916	0.01424	0.0159	100
58	estradiol - MCF7	0.258	19	0.346	0.01637	0.2568	52
59	geldanamycin - MCF7	0.34	10	0.463	0.01759	0.3911	60
60	sodium phenylbutyrate - MCF7	0.404	3	0.793	0.01807	0.0769	100
61	hydrastinine - PC3	-0.518	2	-0.902	0.01899	0.0097	100
62	nifuroxazide - MCF7	0.537	2	0.903	0.01905	0.0988	100
63	ranitidine - PC3	-0.566	2	-0.902	0.01936	0.0098	100
64	zimeldine - PC3	-0.487	2	-0.901	0.01962	0.0099	100
65	famprofazone - PC3	-0.512	2	-0.9	0.02008	0.0337	100
66	alpha-estradiol - PC3	-0.277	3	-0.785	0.02029	0.0107	66
67	resveratrol - PC3	-0.484	2	-0.898	0.02066	0.0403	100
68	zardaverine - MCF7	0.529	2	0.897	0.02199	0.0408	100
69	PF-00875133-00 - MCF7	0.556	2	0.894	0.02324	0.0127	100
70	nalidixic acid - PC3	-0.56	2	-0.892	0.02326	0.0294	100
71	minoxidil - PC3	-0.642	2	-0.89	0.02388	0.0229	100
72	sulfadimidine - PC3	0.523	2	0.892	0.02424	0.0438	100
73	gemfibrozil - PC3	-0.518	2	-0.89	0.02428	0.026	100
74	pregnenolone - MCF7	0.585	2	0.891	0.02479	0.095	100
75	isoconazole - PC3	-0.539	2	-0.887	0.02531	0.0523	100
76	minocycline - MCF7	-0.239	3	-0.765	0.0265	0.0203	66
77	allantoin - MCF7	0.497	2	0.886	0.02702	0.0352	100
78	0316684-0000 - MCF7	-0.56	2	-0.882	0.02813	0.0476	100
79	metampicillin - PC3	0.575	2	0.883	0.02821	0.0595	100
80	fenspiride - PC3	-0.483	2	-0.88	0.02889	0.0215	100
81	benserazide - MCF7	-0.349	3	-0.756	0.02958	0.0118	66
82	hydroflumethiazide - MCF7	-0.462	2	-0.877	0.03028	0.0874	100
83	moxisylyte - PC3	0.606	2	0.876	0.03068	0.0377	100
84	picotamide - PC3	-0.527	2	-0.876	0.03078	0.0162	100
85	midecamycin - PC3	-0.458	2	-0.875	0.03153	0.0215	100
86	sulfaguanidine - PC3	-0.603	2	-0.874	0.03155	0.0253	100
87	securinine - MCF7	0.512	2	0.875	0.03157	0.1605	100
88	ramifenazone - MCF7	-0.453	2	-0.873	0.03217	0.0189	100
89	lomustine - MCF7	0.518	2	0.873	0.03245	0.1582	100
90	fluoxetine - MCF7	-0.453	2	-0.869	0.03388	0.0672	100
91	etodolac - MCF7	0.468	2	0.869	0.03465	0.0426	100
92	vancomycin - MCF7	-0.436	2	-0.868	0.03489	0.0964	100
93	dicycloverine - PC3	0.563	2	0.867	0.03608	0.0988	100
94	CP-863187 - PC3	-0.643	2	-0.866	0.03612	0.0514	100
95	suramin sodium - MCF7	-0.423	2	-0.866	0.03614	0.05	100
96	furaltadone - PC3	-0.473	2	-0.864	0.03704	0.0449	100
97	lidocaine - PC3	-0.414	2	-0.862	0.03841	0.0988	100
98	estradiol - PC3	-0.294	8	-0.47	0.03855	0.0969	62
99	ethotoin - PC3	-0.505	2	-0.861	0.03857	0.0113	100
100	molindone - MCF7	0.533	2	0.859	0.03986	0.0303	100
101	cycloserine - MCF7	-0.463	2	-0.859	0.03994	0.0455	100
102	wortmannin - PC3	-0.534	2	-0.858	0.04038	0.2534	100
103	nifenazone - PC3	-0.42	2	-0.857	0.04066	0.0629	100
104	pivampicillin - MCF7	0.5	2	0.856	0.04179	0.0725	100
105	lobelanidine - MCF7	-0.437	2	-0.854	0.04237	0.0719	100
106	ampyrone - MCF7	-0.443	2	-0.852	0.0435	0.0696	100
107	glipizide - PC3	-0.491	2	-0.851	0.04428	0.0625	100
108	5155877 - MCF7	0.478	2	0.851	0.04455	0.0886	100
109	pentolonium - PC3	-0.413	2	-0.85	0.04481	0.0482	100
110	fludroxycortide - MCF7	0.443	2	0.851	0.04499	0.0067	100
111	meptazinol - MCF7	0.473	2	0.847	0.0475	0.0143	100
112	pindolol - PC3	0.476	2	0.846	0.04791	0.051	100
113	flufenamic acid - PC3	-0.529	2	-0.846	0.04797	0.0464	100
114	arecoline - MCF7	0.56	2	0.844	0.04915	0.0724	100
115	maprotiline - MCF7	0.462	2	0.843	0.04958	0.0876	100
116	estriol - MCF7	0.477	2	0.843	0.04966	0.0662	100
117	11-deoxy-16,16-dimethylprostaglandin E2 - PC3	-0.393	2	-0.842	0.05026	0.0861	100
118	tiapride - PC3	-0.449	2	-0.841	0.05044	0.0256	100
119	withaferin A - MCF7	0.587	2	0.839	0.05213	0.2381	100
120	ofloxacin - PC3	-0.467	2	-0.838	0.05239	0.0442	100
121	minoxidil - MCF7	0.453	2	0.838	0.05279	0.079	100
122	tolfenamic acid - PC3	-0.586	2	-0.837	0.05294	0.0229	100
123	naltrexone - MCF7	0.441	2	0.838	0.05324	0.0649	100
124	morantel - PC3	-0.483	2	-0.834	0.05465	0.045	100
125	eticlopride - MCF7	0.462	2	0.835	0.05469	0.0524	100
126	yohimbine - MCF7	-0.295	3	-0.7	0.0547	0.0387	66
127	butyl hydroxybenzoate - MCF7	0.349	3	0.697	0.05484	0.0881	66
128	nialamide - PC3	-0.399	2	-0.834	0.05513	0.0537	100
129	pirinixic acid - MCF7	-0.407	2	-0.833	0.05547	0.0326	100
130	zuclopenthixol - MCF7	0.449	2	0.834	0.05549	0.1194	100
131	epitiostanol - MCF7	0.462	2	0.833	0.05597	0.0897	100
132	finasteride - PC3	-0.45	2	-0.831	0.05694	0.0727	100
133	methylergometrine - MCF7	-0.42	2	-0.83	0.05704	0.0442	100
134	chenodeoxycholic acid - MCF7	0.427	2	0.831	0.05706	0.0765	100
135	pilocarpine - MCF7	0.442	2	0.831	0.0572	0.0813	100
136	ursolic acid - MCF7	0.503	2	0.829	0.05863	0.0524	100
137	spiradoline - PC3	-0.476	2	-0.826	0.05939	0.0487	100
138	guanabenz - PC3	0.553	2	0.828	0.05947	0.069	100
139	oxyphenbutazone - MCF7	0.459	2	0.828	0.05974	0.1687	100
140	novobiocin - PC3	-0.34	2	-0.825	0.06022	0.046	100
141	sulfacetamide - PC3	0.527	2	0.826	0.06096	0.0821	100
142	iproniazid - MCF7	-0.382	2	-0.824	0.0611	0.0811	100
143	bacitracin - MCF7	0.416	2	0.825	0.06199	0.0726	100
144	penbutolol - MCF7	-0.366	2	-0.823	0.06203	0.0932	100
145	loperamide - PC3	-0.388	2	-0.821	0.06362	0.0909	100
146	0198306-0000 - PC3	-0.456	2	-0.82	0.0638	0.1123	100
147	suramin sodium - PC3	0.452	2	0.822	0.06392	0.1047	100
148	meclofenoxate - PC3	-0.5	2	-0.818	0.06541	0.0531	100
149	triprolidine - MCF7	0.479	2	0.82	0.06543	0	100
150	guaifenesin - MCF7	-0.311	3	-0.681	0.0655	0.1071	66
151	bromocriptine - PC3	-0.495	2	-0.818	0.06555	0.078	100
152	noretynodrel - MCF7	0.427	2	0.818	0.06648	0.1747	100
153	ciclacillin - PC3	0.476	2	0.817	0.06724	0.0563	100
154	serotonin - MCF7	-0.301	3	-0.678	0.0673	0.0585	66
155	meropenem - MCF7	0.397	2	0.817	0.06752	0.0857	100
156	proglumide - PC3	-0.367	2	-0.815	0.06792	0.0942	100
157	homosalate - MCF7	0.591	2	0.815	0.06907	0.0494	100
158	harmol - MCF7	-0.348	2	-0.813	0.06957	0.1161	100
159	diltiazem - PC3	-0.474	2	-0.812	0.06972	0.0645	100
160	vinburnine - MCF7	0.41	2	0.814	0.06996	0.1027	100
161	vincamine - PC3	0.403	2	0.814	0.07032	0.1575	100
162	nalbuphine - PC3	0.522	2	0.813	0.07062	0.0821	100
163	methotrexate - PC3	-0.33	3	-0.67	0.07189	0.1084	66
164	semustine - MCF7	0.449	2	0.811	0.07237	0.1921	100
165	(-)-atenolol - MCF7	-0.333	2	-0.809	0.07259	0.0676	100
166	azathioprine - PC3	0.414	2	0.81	0.07338	0.0833	100
167	midodrine - PC3	0.447	2	0.809	0.07354	0.1289	100
168	racecadotril - MCF7	0.436	2	0.809	0.07376	0.0705	100
169	PF-00539745-00 - PC3	0.39	2	0.809	0.07432	0.1314	100
170	azacyclonol - MCF7	0.488	2	0.805	0.07746	0.106	100
171	haloperidol - PC3	0.234	6	0.487	0.07771	0.12	66
172	podophyllotoxin - MCF7	0.456	2	0.804	0.07825	0.1571	100
173	tretinoin - PC3	-0.205	4	-0.586	0.07961	0.1226	75
174	naltrexone - PC3	0.362	2	0.799	0.08126	0.0851	100
175	metoprolol - MCF7	0.402	2	0.799	0.08141	0.2	100
176	clidinium bromide - MCF7	0.417	2	0.798	0.08185	0.0818	100
177	dicycloverine - MCF7	0.46	2	0.797	0.08295	0.0947	100
178	clindamycin - MCF7	0.408	2	0.797	0.0831	0.1447	100
179	chloropyrazine - MCF7	0.525	2	0.796	0.08396	0.1565	100
180	aminophylline - MCF7	0.358	2	0.793	0.08601	0.0921	100
181	paroxetine - MCF7	-0.158	2	-0.79	0.08617	0.0188	50
182	clebopride - MCF7	0.426	2	0.79	0.08845	0.0971	100
183	megestrol - MCF7	0.44	2	0.79	0.08851	0.0983	100
184	IC-86621 - MCF7	0.374	2	0.79	0.08881	0.1233	100
185	tribenoside - MCF7	0.352	2	0.789	0.08941	0.0914	100
186	isoniazid - PC3	0.439	2	0.788	0.0905	0.1688	100
187	deferoxamine - MCF7	-0.223	5	-0.515	0.0914	0.1491	60
188	benzonatate - MCF7	0.368	2	0.786	0.09207	0.0774	100
189	chloramphenicol - PC3	0.526	2	0.785	0.09285	0.0774	100
190	Prestwick-1080 - MCF7	0.402	2	0.785	0.09322	0.0769	100
191	idoxuridine - MCF7	0.456	2	0.784	0.0939	0.1024	100
192	guanabenz - MCF7	0.358	2	0.784	0.09442	0.0511	100
193	pivmecillinam - MCF7	0.4	2	0.783	0.09466	0.1548	100
194	esculetin - MCF7	0.365	2	0.783	0.09509	0.1104	100
195	lomustine - PC3	-0.264	2	-0.778	0.09728	0.1295	50
196	Prestwick-920 - MCF7	0.419	2	0.78	0.09744	0.0859	100
197	dinoprostone - PC3	-0.255	2	-0.777	0.09784	0.1805	50
198	debrisoquine - MCF7	0.416	2	0.778	0.09879	0.0596	100
199	fosfosal - MCF7	0.362	2	0.775	0.10209	0.0632	100
200	arachidonyltrifluoromethane - MCF7	0.362	2	0.774	0.10253	0.1069	100
201	ioxaglic acid - MCF7	0.372	2	0.773	0.10364	0.1409	100
202	zalcitabine - MCF7	0.459	2	0.771	0.10559	0.1829	100
203	oxaprozin - MCF7	0.198	4	0.557	0.10569	0.2118	75
204	levothyroxine sodium - MCF7	0.299	2	0.77	0.10619	0.0859	100
205	copper sulfate - MCF7	0.276	2	0.769	0.10772	0.0947	100
206	5194442 - PC3	-0.211	2	-0.765	0.10806	0.1761	50
207	SC-560 - MCF7	0.395	2	0.768	0.10831	0.2443	100
208	fluticasone - MCF7	0.353	2	0.767	0.10937	0.2457	100
209	epiandrosterone - MCF7	0.328	2	0.767	0.10951	0.1152	100
210	isoniazid - MCF7	-0.173	2	-0.763	0.11046	0.0526	50
211	protriptyline - MCF7	0.227	2	0.764	0.11197	0.134	50
212	sulindac - MCF7	-0.235	4	-0.552	0.11456	0.1259	50
213	bumetanide - MCF7	-0.226	2	-0.754	0.11943	0.188	50
214	pergolide - MCF7	-0.217	2	-0.75	0.1235	0.1534	50
215	antimycin A - MCF7	0.232	2	0.751	0.12364	0.2085	50
216	withaferin A - PC3	-0.207	2	-0.749	0.12454	0.25	50
217	PNU-0230031 - MCF7	0.185	4	0.54	0.12604	0.0465	75
218	AG-028671 - PC3	-0.289	2	-0.747	0.12651	0.1943	50
219	gabapentin - MCF7	-0.215	2	-0.747	0.12684	0.1412	50
220	pentoxifylline - MCF7	-0.179	2	-0.745	0.12814	0.2252	50
221	azlocillin - MCF7	-0.206	2	-0.745	0.12851	0.1342	50
222	pargyline - MCF7	-0.238	2	-0.744	0.12955	0.2057	50
223	levodopa - MCF7	-0.138	2	-0.743	0.13072	0.125	50
224	oxymetazoline - PC3	-0.297	2	-0.741	0.13227	0.1379	50
225	dilazep - PC3	-0.331	2	-0.74	0.13412	0.2222	50
226	cefotiam - MCF7	-0.17	2	-0.739	0.13506	0.1543	50
227	naftidrofuryl - MCF7	-0.229	2	-0.738	0.13569	0.1733	50
228	homatropine - MCF7	-0.239	2	-0.738	0.13623	0.06	50
229	citalopram - MCF7	-0.144	2	-0.737	0.13764	0.1401	50
230	colchicine - MCF7	0.396	3	0.602	0.13919	0.2051	66
231	vanoxerine - MCF7	-0.166	2	-0.734	0.14062	0.2132	50
232	strophanthidin - MCF7	0.31	2	0.733	0.14134	0.1989	50
233	drofenine - MCF7	0.313	2	0.731	0.14406	0.1264	50
234	colforsin - PC3	-0.228	2	-0.728	0.14667	0.1429	50
235	clozapine - PC3	-0.257	3	-0.596	0.14712	0.2155	66
236	pirenperone - MCF7	-0.229	3	-0.595	0.14849	0.1778	66
237	desipramine - MCF7	0.183	2	0.725	0.15094	0.1899	50
238	tiaprofenic acid - MCF7	-0.162	2	-0.724	0.15195	0.2353	50
239	hydrastinine - MCF7	-0.247	2	-0.723	0.15291	0.1131	50
240	miconazole - MCF7	0.294	2	0.721	0.1551	0.2347	50
241	cyproheptadine - MCF7	0.268	2	0.719	0.15663	0.199	50
242	thiamphenicol - MCF7	-0.184	2	-0.718	0.15774	0.3023	50
243	deferoxamine - PC3	-0.351	3	-0.587	0.15958	0.2284	66
244	etamivan - MCF7	0.18	2	0.715	0.16221	0.1557	50
245	picotamide - MCF7	-0.277	2	-0.715	0.16233	0.2222	50
246	pramocaine - MCF7	-0.295	3	-0.585	0.16331	0.1676	66
247	bretylium tosilate - MCF7	-0.164	2	-0.712	0.16512	0.1936	50
248	SB-202190 - PC3	-0.281	2	-0.712	0.16553	0.1538	50
249	chlorpromazine - PC3	0.27	4	0.51	0.16714	0.285	50
250	naproxen - PC3	-0.161	3	-0.582	0.16852	0.1135	66
251	guanadrel - MCF7	-0.208	2	-0.709	0.16897	0.3182	50
252	norfloxacin - PC3	-0.436	2	-0.709	0.16943	0.2598	50
253	5253409 - MCF7	0.205	2	0.708	0.1708	0.1795	50
254	2-aminobenzenesulfonamide - MCF7	-0.224	2	-0.707	0.17186	0.2293	50
255	Prestwick-857 - MCF7	-0.159	2	-0.704	0.1751	0.2161	50
256	hexetidine - MCF7	0.264	2	0.704	0.17516	0.3088	50
257	Prestwick-682 - MCF7	-0.212	2	-0.703	0.17615	0.1742	50
258	proglumide - MCF7	-0.135	2	-0.703	0.17679	0.0946	50
259	PF-01378883-00 - PC3	-0.298	2	-0.7	0.17957	0.1302	50
260	diclofenac - PC3	-0.318	2	-0.7	0.17989	0.2457	50
261	PHA-00816795 - PC3	-0.295	2	-0.7	0.18033	0.199	50
262	co-dergocrine mesilate - MCF7	-0.214	2	-0.699	0.18104	0.3333	50
263	C-75 - PC3	-0.244	2	-0.698	0.18239	0.0748	50
264	neostigmine bromide - MCF7	-0.19	2	-0.698	0.18261	0.4632	50
265	valdecoxib - PC3	-0.178	2	-0.697	0.18289	0.1258	50
266	exisulind - MCF7	-0.151	2	-0.697	0.18384	0.1322	50
267	trimethadione - MCF7	-0.126	2	-0.696	0.18414	0.1438	50
268	indoprofen - MCF7	-0.142	2	-0.696	0.18466	0.3623	50
269	monorden - PC3	0.299	5	0.455	0.18606	0.3168	60
270	vinpocetine - MCF7	0.216	2	0.694	0.18617	0.1488	50
271	cefsulodin - MCF7	0.199	2	0.692	0.18887	0.1241	50
272	pioglitazone - MCF7	-0.078	6	-0.415	0.18891	0.3041	50
273	cinoxacin - MCF7	0.258	2	0.692	0.18897	0.1208	50
274	roxarsone - MCF7	0.257	2	0.691	0.18989	0.1342	50
275	STOCK1N-35874 - PC3	-0.211	2	-0.691	0.19023	0.2914	50
276	mafenide - MCF7	-0.238	2	-0.69	0.19124	0.2651	50
277	alfaxalone - MCF7	-0.231	2	-0.689	0.19257	0.1503	50
278	suloctidil - MCF7	0.25	2	0.685	0.1973	0.4439	50
279	gliquidone - MCF7	-0.227	2	-0.686	0.19734	0.1677	50
280	betazole - MCF7	-0.243	2	-0.685	0.19758	0.1705	50
281	metolazone - MCF7	-0.197	2	-0.684	0.19929	0.35	50
282	adrenosterone - MCF7	0.207	2	0.682	0.20132	0.1841	50
283	tubocurarine chloride - MCF7	-0.191	2	-0.682	0.2014	0.1506	50
284	carteolol - MCF7	-0.176	2	-0.68	0.20404	0.2393	50
285	16-phenyltetranorprostaglandin E2 - MCF7	-0.208	2	-0.68	0.20424	0.2515	50
286	scriptaid - PC3	0.224	2	0.68	0.20424	0.5	50
287	alprostadil - PC3	0.24	3	0.561	0.20519	0.4346	66
288	proscillaridin - MCF7	0.205	2	0.678	0.20711	0.4779	50
289	riluzole - MCF7	0.213	2	0.677	0.20752	0.1429	50
290	methylprednisolone - MCF7	-0.215	2	-0.677	0.20882	0.2048	50
291	paclitaxel - PC3	-0.302	2	-0.677	0.20911	0.1543	50
292	pinacidil - MCF7	-0.181	2	-0.676	0.20957	0.1384	50
293	2,6-dimethylpiperidine - PC3	-0.328	2	-0.676	0.21015	0.2188	50
294	dequalinium chloride - MCF7	0.218	2	0.675	0.2112	0.3315	50
295	arcaine - MCF7	-0.188	2	-0.675	0.21154	0.3092	50
296	danazol - MCF7	0.199	2	0.674	0.21241	0.1576	50
297	quinisocaine - MCF7	0.274	2	0.673	0.21367	0.2234	50
298	pirenzepine - PC3	0.185	2	0.673	0.21383	0.213	50
299	5230742 - MCF7	-0.187	2	-0.673	0.21416	0.2951	50
300	diclofenamide - MCF7	-0.152	2	-0.672	0.21563	0.2222	50
301	diethylstilbestrol - PC3	-0.193	2	-0.671	0.21665	0.1406	50
302	iodixanol - MCF7	-0.322	2	-0.671	0.21717	0.2041	50
303	todralazine - MCF7	-0.222	2	-0.671	0.21725	0.2941	50
304	phenindione - MCF7	0.239	2	0.67	0.21804	0.1971	50
305	idazoxan - MCF7	-0.165	2	-0.67	0.21838	0.2626	50
306	niclosamide - MCF7	0.17	2	0.668	0.22023	0.4171	50
307	indapamide - PC3	-0.381	2	-0.668	0.2208	0.2154	50
308	demeclocycline - PC3	-0.339	2	-0.668	0.2212	0.3006	50
309	chlortetracycline - PC3	-0.301	2	-0.667	0.22235	0.2599	50
310	15-delta prostaglandin J2 - HL60	0.338	3	0.551	0.22286	0.593	66
311	norfloxacin - MCF7	0.139	2	0.664	0.22589	0.1938	50
312	methylbenzethonium chloride - PC3	0.292	2	0.664	0.22611	0.4564	50
313	N-acetyl-L-leucine - MCF7	-0.15	2	-0.664	0.22645	0.3296	50
314	norethisterone - MCF7	0.192	2	0.663	0.22675	0.2875	50
315	triflupromazine - MCF7	0.206	2	0.661	0.22927	0.3416	50
316	clofazimine - MCF7	0.336	3	0.548	0.22931	0.6301	66
317	antazoline - MCF7	0.261	2	0.661	0.23057	0.1813	50
318	tolbutamide - PC3	-0.212	2	-0.661	0.2313	0.1212	50
319	diflunisal - MCF7	-0.193	2	-0.66	0.23182	0.1737	50
320	heliotrine - PC3	-0.384	2	-0.66	0.23198	0.2917	50
321	5155877 - PC3	-0.271	2	-0.66	0.23253	0.3217	50
322	BCB000040 - PC3	-0.187	2	-0.658	0.23462	0.3333	50
323	valinomycin - MCF7	0.168	2	0.656	0.23679	0.4535	50
324	celecoxib - MCF7	-0.176	4	-0.473	0.23708	0.2903	50
325	meteneprost - MCF7	-0.186	2	-0.655	0.2381	0.2465	50
326	fenbendazole - PC3	0.377	2	0.655	0.23874	0.2513	50
327	chlorphenesin - MCF7	-0.263	2	-0.655	0.23888	0.221	50
328	promazine - PC3	0.232	2	0.654	0.23989	0.352	50
329	chlortetracycline - MCF7	-0.299	2	-0.654	0.23989	0.2239	50
330	fluphenazine - HL60	-0.274	4	-0.472	0.24003	0.3929	50
331	proguanil - MCF7	0.285	2	0.653	0.2408	0.2795	50
332	tiapride - MCF7	0.267	2	0.653	0.24194	0.1304	50
333	mometasone - MCF7	0.21	2	0.651	0.24401	0.3016	50
334	ketorolac - MCF7	0.216	2	0.65	0.24589	0.3094	50
335	isoconazole - MCF7	0.19	2	0.649	0.24623	0.3014	50
336	butacaine - MCF7	0.19	2	0.649	0.24748	0.1528	50
337	BCB000040 - MCF7	-0.247	2	-0.648	0.24834	0.0735	50
338	hesperidin - MCF7	-0.272	2	-0.648	0.24906	0.1447	50
339	0225151-0000 - PC3	-0.271	2	-0.647	0.24991	0.1575	50
340	josamycin - MCF7	-0.196	2	-0.646	0.25067	0.344	50
341	thioperamide - MCF7	0.349	3	0.537	0.25136	0.489	66
342	doxylamine - PC3	-0.17	2	-0.645	0.25299	0.31	50
343	NU-1025 - MCF7	-0.181	2	-0.643	0.25617	0.2151	50
344	tracazolate - MCF7	0.2	2	0.642	0.25631	0.2166	50
345	N6-methyladenosine - MCF7	-0.193	2	-0.642	0.2577	0.4162	50
346	chlorprothixene - MCF7	0.19	2	0.641	0.25836	0.3077	50
347	iobenguane - MCF7	0.254	2	0.64	0.25878	0.1069	50
348	ivermectin - PC3	0.23	2	0.639	0.25993	0.3667	50
349	altizide - MCF7	-0.236	2	-0.64	0.26071	0.1837	50
350	nimodipine - MCF7	-0.254	2	-0.64	0.26104	0.3548	50
351	meclocycline - MCF7	-0.136	2	-0.638	0.26401	0.1921	50
352	AG-013608 - PC3	-0.142	4	-0.461	0.2642	0.2105	50
353	flumequine - MCF7	-0.192	2	-0.637	0.26428	0.2338	50
354	nifurtimox - MCF7	0.216	2	0.636	0.26472	0.1765	50
355	sulfachlorpyridazine - PC3	-0.174	2	-0.636	0.2655	0.2376	50
356	indometacin - PC3	-0.201	2	-0.635	0.26741	0.3354	50
357	asiaticoside - MCF7	0.221	2	0.633	0.26933	0.2168	50
358	aminophenazone - MCF7	0.166	2	0.632	0.27053	0.2647	50
359	PHA-00767505E - MCF7	-0.271	2	-0.632	0.27275	0.3296	50
360	brinzolamide - MCF7	-0.173	2	-0.63	0.27566	0.2876	50
361	diflorasone - MCF7	0.132	2	0.628	0.27641	0.3168	50
362	esculin - MCF7	-0.228	2	-0.629	0.27691	0.2632	50
363	iocetamic acid - MCF7	-0.247	2	-0.629	0.27715	0.2037	50
364	hydroxyzine - MCF7	0.281	2	0.628	0.27767	0.1308	50
365	flumetasone - MCF7	0.36	3	0.524	0.27782	0.2064	66
366	fenspiride - MCF7	-0.155	2	-0.627	0.28013	0.2155	50
367	chlorcyclizine - PC3	-0.17	2	-0.626	0.28126	0.3072	50
368	oxetacaine - MCF7	0.282	2	0.624	0.28273	0.3867	50
369	saquinavir - MCF7	-0.245	2	-0.625	0.28291	0.5899	50
370	phensuximide - MCF7	-0.178	2	-0.625	0.28355	0.2682	50
371	W-13 - MCF7	-0.219	2	-0.624	0.28401	0.255	50
372	Trolox C - MCF7	0.236	2	0.623	0.28437	0.2222	50
373	naringin - MCF7	-0.194	2	-0.623	0.28578	0.322	50
374	lisinopril - MCF7	0.203	2	0.62	0.28995	0.2254	50
375	nitrendipine - MCF7	0.314	3	0.518	0.29126	0.2549	66
376	fusaric acid - MCF7	0.134	2	0.618	0.29262	0.3504	50
377	SC-58125 - MCF7	-0.243	2	-0.619	0.29309	0.2133	50
378	diflunisal - PC3	-0.244	2	-0.618	0.29413	0.3861	50
379	0198306-0000 - MCF7	-0.304	2	-0.617	0.29582	0.3203	50
380	fludroxycortide - PC3	0.147	2	0.616	0.29667	0.2574	50
381	antimycin A - PC3	-0.381	2	-0.616	0.29796	0.3688	50
382	remoxipride - MCF7	-0.182	2	-0.615	0.29832	0.4195	50
383	tenoxicam - MCF7	-0.195	2	-0.614	0.29995	0.2023	50
384	chlorambucil - PC3	-0.193	2	-0.614	0.30069	0.4085	50
385	alprenolol - MCF7	-0.209	2	-0.614	0.30089	0.3198	50
386	captopril - MCF7	-0.163	2	-0.612	0.30423	0.4277	50
387	(-)-isoprenaline - MCF7	-0.203	2	-0.61	0.30689	0.2917	50
388	clemizole - PC3	-0.297	2	-0.609	0.30858	0.4012	50
389	eucatropine - PC3	-0.357	2	-0.608	0.30916	0.5737	50
390	josamycin - PC3	0.181	2	0.607	0.31077	0.3711	50
391	timolol - MCF7	0.311	3	0.509	0.31131	0.561	66
392	cinnarizine - MCF7	0.278	2	0.606	0.31218	0.1355	50
393	pheniramine - PC3	-0.321	2	-0.606	0.31305	0.2938	50
394	ornidazole - PC3	-0.258	2	-0.605	0.31474	0.5024	50
395	risperidone - MCF7	0.171	2	0.604	0.31496	0.1	50
396	etofylline - MCF7	0.161	2	0.603	0.31657	0.2378	50
397	suprofen - MCF7	0.18	2	0.602	0.31795	0.2556	50
398	metformin - MCF7	0.078	7	0.338	0.32015	0.3158	57
399	mefexamide - MCF7	-0.287	2	-0.602	0.32039	0.2909	50
400	sulfamethizole - MCF7	-0.269	2	-0.601	0.32111	0.4235	50
401	(+)-chelidonine - MCF7	0.302	2	0.599	0.32296	0.1902	50
402	oleandomycin - PC3	-0.205	2	-0.597	0.32743	0.4231	50
403	gallamine triethiodide - MCF7	0.113	2	0.596	0.32808	0.3125	50
404	STOCK1N-35215 - PC3	-0.19	2	-0.596	0.32878	0.3094	50
405	tranexamic acid - PC3	0.232	2	0.594	0.33172	0.4768	50
406	hemicholinium - MCF7	-0.169	2	-0.593	0.33369	0.4337	50
407	bupivacaine - MCF7	0.185	2	0.591	0.33522	0.2	50
408	crotamiton - MCF7	0.188	2	0.591	0.33558	0.3095	50
409	ondansetron - MCF7	-0.197	2	-0.591	0.33647	0.3	50
410	harmaline - MCF7	0.259	2	0.591	0.33671	0.15	50
411	ketanserin - MCF7	-0.256	2	-0.591	0.33727	0.5635	50
412	metamizole sodium - PC3	-0.323	2	-0.59	0.33799	0.6839	50
413	flutamide - MCF7	0.258	2	0.589	0.3385	0.3515	50
414	rilmenidine - MCF7	-0.218	2	-0.589	0.34049	0.2899	50
415	disulfiram - MCF7	0.243	2	0.585	0.34612	0.5568	50
416	conessine - MCF7	0.308	2	0.584	0.34775	0.0909	50
417	lynestrenol - MCF7	0.317	2	0.583	0.3487	0.3582	50
418	benperidol - MCF7	-0.269	2	-0.584	0.34906	0.6509	50
419	lisuride - PC3	0.29	2	0.582	0.34936	0.5833	50
420	pridinol - MCF7	0.29	2	0.582	0.35021	0.3309	50
421	thiocolchicoside - MCF7	-0.265	2	-0.583	0.35039	0.4596	50
422	carisoprodol - MCF7	0.331	2	0.581	0.35198	0.223	50
423	zimeldine - MCF7	-0.223	2	-0.581	0.3522	0.526	50
424	solasodine - PC3	-0.238	2	-0.58	0.35451	0.5924	50
425	citiolone - PC3	-0.297	2	-0.579	0.35683	0.6546	50
426	kinetin - MCF7	0.244	2	0.577	0.35789	0.2516	50
427	paracetamol - MCF7	0.197	2	0.576	0.35999	0.3789	50
428	Prestwick-981 - MCF7	0.155	2	0.575	0.36192	0.3684	50
429	memantine - MCF7	-0.194	2	-0.576	0.36216	0.4737	50
430	SR-95531 - MCF7	-0.136	2	-0.576	0.3625	0.2955	50
431	altretamine - MCF7	0.186	2	0.573	0.36564	0.2143	50
432	dirithromycin - MCF7	0.145	2	0.572	0.36656	0.2297	50
433	roxithromycin - MCF7	-0.167	2	-0.572	0.36878	0.7006	50
434	BCB000039 - PC3	-0.452	2	-0.572	0.36904	0.2651	50
435	metyrapone - MCF7	0.27	2	0.57	0.36976	0.3103	50
436	propylthiouracil - MCF7	-0.204	2	-0.57	0.37091	0.6447	50
437	sparteine - MCF7	0.208	2	0.568	0.3731	0.2117	50
438	sulfaguanidine - MCF7	0.215	2	0.567	0.37508	0.442	50
439	dehydrocholic acid - PC3	-0.207	2	-0.568	0.3752	0.4162	50
440	levcycloserine - PC3	-0.221	2	-0.567	0.37685	0.6	50
441	boldine - MCF7	0.213	2	0.566	0.37695	0.1322	50
442	PHA-00745360 - PC3	-0.11	4	-0.418	0.37759	0.5923	50
443	ethaverine - MCF7	-0.26	2	-0.567	0.37777	0.4467	50
444	flunixin - MCF7	0.164	2	0.565	0.37795	0.1958	50
445	etifenin - MCF7	0.21	2	0.565	0.3785	0.2925	50
446	benzylpenicillin - MCF7	-0.181	2	-0.566	0.37908	0.4775	50
447	chrysin - MCF7	-0.2	2	-0.564	0.38308	0.7446	50
448	eldeline - PC3	-0.283	2	-0.563	0.3833	0.6771	50
449	talampicillin - MCF7	0.243	2	0.562	0.38473	0.3741	50
450	prasterone - MCF7	0.391	2	0.561	0.38554	0.5147	50
451	acetylsalicylsalicylic acid - MCF7	-0.213	2	-0.561	0.38689	0.5596	50
452	2,6-dimethylpiperidine - MCF7	-0.1	3	-0.477	0.38749	0.3053	66
453	pimethixene - MCF7	0.216	2	0.56	0.38811	0.662	50
454	amoxapine - MCF7	0.264	2	0.559	0.38956	0.4315	50
455	triamcinolone - PC3	0.357	2	0.558	0.39008	0.4196	50
456	oleandomycin - MCF7	0.127	2	0.558	0.39123	0.2769	50
457	metanephrine - MCF7	-0.171	2	-0.558	0.39139	0.2973	50
458	nafcillin - MCF7	0.206	2	0.557	0.39192	0.3209	50
459	coralyne - MCF7	0.24	2	0.557	0.39246	0.4973	50
460	canrenoic acid - PC3	-0.33	2	-0.556	0.39616	0.5763	50
461	0173570-0000 - PC3	-0.221	4	-0.412	0.39714	0.5397	50
462	edrophonium chloride - PC3	-0.145	2	-0.555	0.39745	0.5936	50
463	flunisolide - MCF7	0.261	3	0.473	0.39813	0.4716	66
464	proadifen - MCF7	0.249	2	0.553	0.39839	0.6305	50
465	bergenin - MCF7	0.227	2	0.552	0.39996	0.3091	50
466	mianserin - MCF7	0.259	2	0.551	0.40254	0.3462	50
467	chlorpropamide - MCF7	-0.218	4	-0.41	0.40363	0.4134	50
468	oxprenolol - MCF7	-0.189	2	-0.55	0.40483	0.5	50
469	carbamazepine - PC3	0.221	2	0.549	0.40568	0.3517	50
470	phenazopyridine - MCF7	-0.223	2	-0.549	0.40672	0.3631	50
471	BCB000038 - MCF7	-0.155	2	-0.549	0.40821	0.672	50
472	vitexin - MCF7	-0.237	2	-0.548	0.40934	0.6515	50
473	famotidine - PC3	-0.228	2	-0.547	0.4101	0.4571	50
474	benzydamine - MCF7	0.182	2	0.546	0.41027	0.3879	50
475	cytisine - MCF7	0.25	2	0.546	0.41053	0.2319	50
476	cyclizine - MCF7	-0.297	2	-0.547	0.41081	0.5192	50
477	octopamine - MCF7	-0.261	2	-0.546	0.41206	0.65	50
478	atractyloside - MCF7	0.194	2	0.544	0.41387	0.6973	50
479	chlorzoxazone - MCF7	0.26	2	0.544	0.41467	0.5591	50
480	luteolin - MCF7	-0.227	2	-0.544	0.4156	0.7262	50
481	laudanosine - MCF7	0.222	2	0.543	0.41596	0.1769	50
482	diphenylpyraline - PC3	0.197	2	0.542	0.41882	0.2434	50
483	tetracycline - PC3	-0.175	2	-0.542	0.41926	0.4518	50
484	SB-203580 - PC3	-0.23	2	-0.541	0.42212	0.5619	50
485	tetracaine - MCF7	-0.137	2	-0.54	0.42326	0.2987	50
486	estrone - MCF7	0.292	2	0.54	0.4234	0.25	50
487	harman - MCF7	-0.188	2	-0.539	0.42453	0.5801	50
488	scopolamine - MCF7	-0.273	2	-0.539	0.42497	0.5283	50
489	physostigmine - MCF7	0.192	2	0.538	0.42769	0.3357	50
490	heliotrine - MCF7	0.255	3	0.461	0.42853	0.3798	66
491	neomycin - PC3	-0.262	2	-0.537	0.42986	0.665	50
492	spectinomycin - MCF7	0.277	2	0.536	0.43111	0.2917	50
493	3-nitropropionic acid - PC3	-0.186	2	-0.535	0.43226	0.6524	50
494	PHA-00851261E - PC3	-0.104	4	-0.401	0.43251	0.6103	50
495	CP-944629 - MCF7	-0.229	2	-0.534	0.43328	0.3986	50
496	alfuzosin - MCF7	0.235	3	0.459	0.43404	0.5	66
497	cisapride - MCF7	0.193	2	0.533	0.43509	0.3846	50
498	phenformin - MCF7	0.191	4	0.398	0.43631	0.3926	50
499	azaperone - MCF7	0.182	2	0.532	0.43809	0.4207	50
500	lincomycin - MCF7	0.212	2	0.532	0.43843	0.248	50
501	oxybutynin - MCF7	0.153	2	0.53	0.44123	0.5843	50
502	butirosin - MCF7	0.168	2	0.53	0.44173	0.4142	50
503	spironolactone - MCF7	-0.146	2	-0.53	0.44183	0.5793	50
504	oxantel - MCF7	-0.191	2	-0.53	0.44216	0.3647	50
505	(+)-isoprenaline - MCF7	-0.161	2	-0.529	0.44262	0.3065	50
506	mepenzolate bromide - MCF7	0.127	2	0.528	0.44566	0.5612	50
507	alclometasone - MCF7	-0.241	2	-0.527	0.44712	0.4731	50
508	salbutamol - PC3	0.21	2	0.527	0.44737	0.5614	50
509	clonidine - MCF7	0.223	2	0.526	0.44877	0.4375	50
510	bendroflumethiazide - MCF7	0.259	3	0.453	0.4495	0.5299	66
511	flecainide - PC3	0.327	2	0.525	0.45038	0.3946	50
512	PF-01378883-00 - MCF7	0.181	2	0.525	0.45091	0.5215	50
513	diethylcarbamazine - MCF7	0.272	2	0.524	0.45151	0.1277	50
514	miconazole - PC3	-0.213	2	-0.524	0.45175	0.3955	50
515	Prestwick-984 - MCF7	0.286	2	0.524	0.45179	0.2319	50
516	hycanthone - MCF7	-0.234	2	-0.523	0.45403	0.5703	50
517	metanephrine - PC3	-0.198	2	-0.523	0.45471	0.5294	50
518	lobeline - MCF7	0.262	2	0.522	0.45594	0.1544	50
519	apramycin - MCF7	0.215	2	0.522	0.45622	0.2556	50
520	thioproperazine - MCF7	-0.232	2	-0.522	0.45644	0.4768	50
521	trimethylcolchicinic acid - MCF7	0.211	2	0.518	0.4638	0.6269	50
522	0179445-0000 - PC3	-0.017	4	-0.391	0.46472	0.4726	50
523	hexamethonium bromide - PC3	0.247	2	0.517	0.46606	0.295	50
524	etofenamate - MCF7	0.164	2	0.516	0.46654	0.3108	50
525	hydroxyachillin - MCF7	-0.262	2	-0.516	0.46769	0.5562	50
526	halofantrine - MCF7	0.218	2	0.516	0.46781	0.6154	50
527	rolipram - MCF7	0.223	2	0.515	0.46906	0.3923	50
528	cefepime - MCF7	-0.251	2	-0.515	0.47071	0.2616	50
529	pizotifen - MCF7	0.308	2	0.513	0.47318	0.6649	50
530	meclofenamic acid - MCF7	-0.18	2	-0.512	0.47495	0.5669	50
531	Prestwick-674 - PC3	0.158	2	0.511	0.47708	0.4564	50
532	terbutaline - MCF7	0.173	2	0.509	0.48097	0.2448	50
533	ciclacillin - MCF7	0.202	2	0.509	0.48123	0.3154	50
534	cyclobenzaprine - MCF7	0.308	2	0.506	0.48698	0.6667	50
535	AH-23848 - MCF7	-0.209	2	-0.506	0.48722	0.5318	50
536	mesoridazine - MCF7	0.236	2	0.505	0.48777	0.4068	50
537	quercetin - MCF7	-0.186	4	-0.383	0.48917	0.4032	50
538	noscapine - MCF7	0.272	2	0.505	0.48964	0.3049	50
539	cobalt chloride - MCF7	0.222	3	0.438	0.4901	0.5405	66
540	repaglinide - MCF7	-0.215	2	-0.503	0.49266	0.8316	50
541	glycopyrronium bromide - PC3	-0.241	2	-0.503	0.49388	0.6104	50
542	solanine - MCF7	0.289	2	0.502	0.494	0.3243	50
543	phenformin - PC3	-0.219	2	-0.502	0.49469	0.5878	50
544	idoxuridine - PC3	0.314	2	0.5	0.49837	0.5494	50
545	etomidate - MCF7	-0.205	2	-0.5	0.49887	0.754	50
546	sulfadiazine - PC3	-0.167	2	-0.5	0.50012	0.3674	50
547	halcinonide - PC3	0.269	2	0.499	0.50125	0.4265	50
548	lanatoside C - PC3	0.439	2	0.499	0.50243	0.8019	50
549	dizocilpine - PC3	0.21	2	0.499	0.50412	0.355	50
550	flunixin - PC3	-0.253	2	-0.499	0.50421	0.5313	50
551	heptaminol - PC3	0.419	2	0.499	0.50473	0.7126	50
552	paroxetine - PC3	-0.275	2	-0.499	0.50479	0.3989	50
553	torasemide - MCF7	0.186	2	0.498	0.50547	0.4857	50
554	amoxapine - PC3	-0.223	2	-0.498	0.50555	0.6927	50
555	tolazoline - PC3	-0.334	2	-0.498	0.50555	0.7389	50
556	zomepirac - MCF7	0.208	2	0.498	0.50744	0.4211	50
557	triamterene - PC3	0.147	2	0.498	0.50811	0.546	50
558	bambuterol - MCF7	0.191	2	0.497	0.51008	0.7427	50
559	nicergoline - PC3	0.158	2	0.497	0.51008	0.5057	50
560	flavoxate - MCF7	0.206	2	0.497	0.51036	0.3378	50
561	sulpiride - PC3	-0.163	2	-0.497	0.51097	0.7562	50
562	epirizole - PC3	0.067	2	0.497	0.51105	0.2925	50
563	tiletamine - MCF7	-0.158	2	-0.496	0.51334	0.5657	50
564	sulfadiazine - MCF7	0.261	2	0.496	0.51364	0.3047	50
565	dimethadione - MCF7	0.204	2	0.495	0.51718	0.4667	50
566	praziquantel - MCF7	0.166	2	0.494	0.52052	0.5226	50
567	aminophenazone - PC3	-0.072	2	-0.494	0.52074	0.359	50
568	hydroflumethiazide - PC3	0.379	2	0.494	0.52115	0.7279	50
569	oxolamine - MCF7	0.233	2	0.494	0.52328	0.6289	50
570	amylocaine - PC3	-0.264	2	-0.493	0.52439	0.7273	50
571	diphenhydramine - PC3	0.376	2	0.493	0.52439	0.6092	50
572	16-phenyltetranorprostaglandin E2 - PC3	-0.06	2	-0.493	0.52487	0.4345	50
573	benfluorex - MCF7	0.247	2	0.493	0.52507	0.6395	50
574	ethoxyquin - MCF7	0.2	2	0.493	0.52571	0.4778	50
575	phenelzine - PC3	0.047	2	0.492	0.53042	0.4286	50
576	apomorphine - PC3	-0.138	2	-0.492	0.5307	0.5544	50
577	lynestrenol - PC3	-0.24	2	-0.492	0.5307	0.5467	50
578	atropine oxide - PC3	-0.36	2	-0.491	0.53215	0.7596	50
579	myosmine - PC3	0.303	2	0.491	0.53358	0.518	50
580	sitosterol - MCF7	-0.155	2	-0.49	0.53569	0.7796	50
581	gliclazide - MCF7	-0.274	2	-0.49	0.5364	0.7602	50
582	isoxsuprine - PC3	0.266	2	0.49	0.53746	0.4217	50
583	dehydrocholic acid - MCF7	-0.313	2	-0.49	0.53893	0.7308	50
584	quinethazone - PC3	-0.119	2	-0.489	0.53954	0.7238	50
585	aceclofenac - PC3	0.132	2	0.489	0.54096	0.3548	50
586	pentoxifylline - PC3	0.358	2	0.489	0.54207	0.8242	50
587	PNU-0293363 - PC3	-0.134	2	-0.489	0.54302	0.4512	50
588	mephenesin - PC3	-0.17	2	-0.489	0.54302	0.7389	50
589	terguride - MCF7	0.236	4	0.366	0.54391	0.4657	50
590	PHA-00846566E - PC3	0.186	2	0.488	0.54451	0.3699	50
591	retrorsine - MCF7	0.356	2	0.488	0.54513	0.3047	50
592	NS-398 - MCF7	0.253	2	0.487	0.54748	0.5625	50
593	karakoline - PC3	0.15	2	0.487	0.54748	0.6163	50
594	geldanamycin - PC3	0.354	2	0.487	0.54825	0.7345	50
595	alpha-ergocryptine - PC3	-0.11	2	-0.487	0.55108	0.5075	50
596	nifenazone - MCF7	0.265	2	0.486	0.55211	0.3427	50
597	homatropine - PC3	-0.045	2	-0.486	0.55483	0.4602	50
598	metoclopramide - PC3	-0.056	2	-0.485	0.55793	0.4129	50
599	mefenamic acid - PC3	0.039	2	0.485	0.55793	0.2901	50
600	theobromine - MCF7	0.206	2	0.485	0.55793	0.5968	50
601	mianserin - PC3	0.347	2	0.484	0.55905	0.8359	50
602	santonin - PC3	0.347	2	0.484	0.5598	0.307	50
603	PF-00539758-00 - PC3	0.345	2	0.484	0.56213	0.6702	50
604	Gly-His-Lys - PC3	0.151	2	0.483	0.5633	0.7829	50
605	propidium iodide - MCF7	-0.155	2	-0.483	0.5635	0.3315	50
606	nifedipine - PC3	0.345	2	0.483	0.56396	0.5404	50
607	oxedrine - MCF7	-0.154	2	-0.483	0.56569	0.3856	50
608	prednisone - PC3	0.343	2	0.482	0.56623	0.5168	50
609	spiramycin - PC3	0.021	2	0.482	0.56694	0.3333	50
610	trichlormethiazide - MCF7	0.217	2	0.481	0.57171	0.6335	50
611	fludrocortisone - PC3	0.34	2	0.481	0.57281	0.6133	50
612	ofloxacin - MCF7	-0.151	2	-0.48	0.57358	0.5476	50
613	carmustine - MCF7	0.34	2	0.48	0.57398	0.6868	50
614	salbutamol - MCF7	0.194	2	0.48	0.57517	0.468	50
615	dapsone - PC3	-0.037	2	-0.48	0.57607	0.3265	50
616	ursolic acid - PC3	0.094	2	0.48	0.5772	0.45	50
617	diphemanil metilsulfate - PC3	0.336	2	0.479	0.5779	0.5302	50
618	metronidazole - PC3	0.091	2	0.479	0.5806	0.7662	50
619	buflomedil - MCF7	0.144	2	0.478	0.58126	0.6294	50
620	hydrochlorothiazide - PC3	-0.021	2	-0.478	0.58165	0.6229	50
621	sulindac - PC3	0.333	2	0.478	0.58177	0.8925	50
622	apomorphine - MCF7	0.165	2	0.478	0.5831	0.5448	50
623	betazole - PC3	0	2	-0.478	0.5835	0.5333	50
624	methoxamine - MCF7	0.144	2	0.477	0.58811	0.8192	50
625	fluvoxamine - MCF7	0.248	2	0.476	0.58861	0.6013	50
626	isoxsuprine - MCF7	0.315	2	0.476	0.58921	0.7118	50
627	zidovudine - MCF7	0.19	2	0.476	0.59054	0.4493	50
628	homosalate - PC3	-0.077	2	-0.476	0.59094	0.7076	50
629	letrozole - MCF7	0.279	2	0.476	0.59175	0.4211	50
630	Prestwick-689 - MCF7	0.31	2	0.475	0.59305	0.6324	50
631	dipivefrine - MCF7	-0.145	2	-0.475	0.59394	0.5121	50
632	iproniazid - PC3	0.326	2	0.475	0.59472	0.8523	50
633	isosorbide - MCF7	0.233	2	0.474	0.59686	0.4539	50
634	moroxydine - MCF7	0.105	2	0.474	0.59883	0.787	50
635	metrifonate - PC3	-0.013	2	-0.473	0.59913	0.4426	50
636	prilocaine - PC3	0.021	2	0.473	0.60126	0.3603	50
637	H-89 - PC3	0.222	2	0.473	0.60205	0.5	50
638	fluorocurarine - MCF7	-0.173	2	-0.471	0.60706	0.6242	50
639	pentetrazol - MCF7	0.318	2	0.47	0.61156	0.6148	50
640	allantoin - PC3	0.066	2	0.47	0.61207	0.4333	50
641	mephentermine - MCF7	0.18	2	0.47	0.61207	0.6393	50
642	piperacillin - PC3	0.072	2	0.47	0.6133	0.48	50
643	diphenhydramine - MCF7	-0.192	2	-0.469	0.61452	0.6733	50
644	orlistat - PC3	-0.07	2	-0.469	0.61597	0.4244	50
645	nordihydroguaiaretic acid - PC3	0.316	2	0.468	0.6175	0.4722	50
646	triamterene - MCF7	0.266	2	0.468	0.6175	0.5076	50
647	piroxicam - MCF7	0.255	2	0.468	0.61927	0.5221	50
648	dicoumarol - PC3	-0.129	2	-0.468	0.62052	0.6069	50
649	dorzolamide - MCF7	0.195	2	0.468	0.62058	0.5494	50
650	CP-320650-01 - PC3	0.016	4	-0.345	0.62144	0.8309	50
651	levomepromazine - PC3	0.315	2	0.467	0.62321	0.8698	50
652	kawain - PC3	0.257	2	0.467	0.62362	0.5455	50
653	naringenin - MCF7	0.314	2	0.467	0.62418	0.8962	50
654	sulfamethoxazole - PC3	0.013	2	0.466	0.62543	0.4191	50
655	gossypol - PC3	0.244	2	0.466	0.62668	0.7931	50
656	moroxydine - PC3	0.312	2	0.465	0.6306	0.5484	50
657	sulfathiazole - PC3	0.311	2	0.464	0.63195	0.7239	50
658	riluzole - PC3	0.073	2	0.464	0.63323	0.6552	50
659	acetohexamide - MCF7	0.176	2	0.463	0.6346	0.5649	50
660	bezafibrate - MCF7	-0.216	2	-0.464	0.63476	0.8564	50
661	carcinine - MCF7	0.218	2	0.462	0.63818	0.3488	50
662	picrotoxinin - MCF7	-0.106	2	-0.463	0.63881	0.4535	50
663	amiloride - PC3	-0.013	2	-0.462	0.63935	0.4886	50
664	dihydroergotamine - PC3	0.054	2	0.461	0.64199	0.5155	50
665	AH-6809 - PC3	-0.107	2	-0.461	0.64348	0.6592	50
666	hexylcaine - MCF7	0.256	2	0.46	0.64482	0.4366	50
667	labetalol - MCF7	0.219	2	0.46	0.64527	0.6667	50
668	cicloheximide - MCF7	0.215	2	0.459	0.64907	0.779	50
669	salsolinol - MCF7	0.217	2	0.459	0.65017	0.4643	50
670	tropicamide - PC3	-0.221	2	-0.459	0.6507	0.62	50
671	5211181 - MCF7	0.22	2	0.459	0.65112	0.5876	50
672	piracetam - MCF7	0.196	2	0.457	0.65663	0.5621	50
673	amphotericin B - MCF7	0.168	2	0.456	0.65885	0.6646	50
674	urapidil - MCF7	-0.161	2	-0.456	0.65987	0.6687	50
675	aminoglutethimide - MCF7	0.203	2	0.455	0.66392	0.7279	50
676	calycanthine - MCF7	0.3	2	0.454	0.66567	0.5419	50
677	aztreonam - PC3	0.299	2	0.454	0.66611	0.6883	50
678	glycocholic acid - MCF7	-0.263	2	-0.454	0.66663	0.7391	50
679	xylometazoline - MCF7	0.239	2	0.454	0.66704	0.635	50
680	ethambutol - PC3	0.298	2	0.453	0.66816	0.6103	50
681	thiamazole - PC3	-0.067	2	-0.453	0.66991	0.5621	50
682	PNU-0251126 - MCF7	0.297	2	0.452	0.67194	0.7651	50
683	liothyronine - MCF7	0.21	2	0.452	0.67257	0.6719	50
684	colistin - MCF7	0.297	2	0.451	0.67524	0.8619	50
685	clindamycin - PC3	0.296	2	0.451	0.67671	0.6299	50
686	ethosuximide - PC3	-0.039	2	-0.451	0.67734	0.5955	50
687	16,16-dimethylprostaglandin E2 - PC3	0.296	2	0.45	0.67891	0.7714	50
688	clopamide - MCF7	0.296	2	0.45	0.67933	0.7466	50
689	pyrimethamine - PC3	0.295	2	0.45	0.6805	0.7019	50
690	7-aminocephalosporanic acid - MCF7	0.189	2	0.449	0.68146	0.7279	50
691	hyoscyamine - PC3	0.008	2	0.449	0.68146	0.4122	50
692	lysergol - MCF7	0.203	2	0.449	0.68211	0.5764	50
693	tolazoline - MCF7	0.161	2	0.449	0.68253	0.7391	50
694	iopanoic acid - MCF7	0.295	2	0.449	0.68285	0.806	50
695	fluorometholone - MCF7	0.229	2	0.449	0.68335	0.7802	50
696	foliosidine - PC3	0.294	2	0.448	0.68502	0.5556	50
697	nimesulide - MCF7	-0.247	2	-0.449	0.68601	0.6686	50
698	propranolol - MCF7	0.137	2	0.448	0.68744	0.5493	50
699	tolnaftate - PC3	-0.069	2	-0.448	0.68862	0.8151	50
700	nialamide - MCF7	0.011	2	0.447	0.68985	0.5714	50
701	SC-19220 - PC3	0.293	2	0.446	0.69062	0.6767	50
702	metitepine - MCF7	0.188	2	0.446	0.6919	0.9409	50
703	puromycin - MCF7	0.154	2	0.445	0.69462	0.8495	50
704	zaprinast - MCF7	-0.018	2	-0.446	0.6947	0.5115	50
705	BAS-012416453 - MCF7	0.127	2	0.444	0.69776	0.8054	50
706	hesperetin - PC3	-0.016	2	-0.444	0.69848	0.8263	50
707	cortisone - MCF7	-0.256	2	-0.444	0.69961	0.8714	50
708	heptaminol - MCF7	0.289	2	0.443	0.70041	0.8431	50
709	naphazoline - MCF7	0.025	2	0.443	0.70094	0.512	50
710	clobetasol - MCF7	-0.247	2	-0.443	0.70241	0.7372	50
711	DL-thiorphan - MCF7	-0.281	2	-0.442	0.70416	0.9546	50
712	acacetin - PC3	0.079	2	0.442	0.70496	0.7456	50
713	amiprilose - MCF7	0.059	2	0.441	0.70774	0.6336	50
714	6-azathymine - MCF7	0.22	2	0.44	0.70955	0.7353	50
715	pentolonium - MCF7	0.286	2	0.44	0.70955	0.638	50
716	etodolac - PC3	0.021	2	0.44	0.7107	0.4825	50
717	AR-A014418 - PC3	0.286	2	0.44	0.71108	0.7203	50
718	nocodazole - PC3	-0.09	2	-0.439	0.71267	0.7941	50
719	cimetidine - PC3	-0.23	2	-0.439	0.71414	0.7593	50
720	dydrogesterone - MCF7	0.215	2	0.439	0.71444	0.5946	50
721	F0447-0125 - MCF7	0.215	2	0.439	0.71498	0.822	50
722	zoxazolamine - MCF7	0.175	2	0.438	0.71591	0.6759	50
723	melatonin - MCF7	0.284	2	0.438	0.71623	0.8095	50
724	hydralazine - PC3	-0.102	2	-0.438	0.71685	0.7797	50
725	santonin - MCF7	0.126	2	0.437	0.7186	0.6622	50
726	carbenoxolone - MCF7	-0.09	2	-0.437	0.71911	0.6757	50
727	dobutamine - MCF7	0.193	2	0.437	0.71923	0.7639	50
728	tamoxifen - MCF7	-0.229	4	-0.315	0.72164	0.7521	50
729	khellin - PC3	-0.013	2	-0.436	0.7223	0.6452	50
730	metaraminol - PC3	-0.273	2	-0.435	0.72432	0.9444	50
731	AG-012559 - PC3	0.282	2	0.434	0.72689	0.6829	50
732	dihydroergotamine - MCF7	-0.215	2	-0.434	0.72756	0.7027	50
733	doxylamine - MCF7	0.281	2	0.434	0.72798	0.741	50
734	benzonatate - PC3	0.01	2	0.434	0.72939	0.4818	50
735	sulfaphenazole - MCF7	0.075	2	0.433	0.73007	0.8069	50
736	mefenamic acid - MCF7	-0.23	2	-0.432	0.73301	0.8218	50
737	ethisterone - PC3	0.28	2	0.431	0.73625	0.8372	50
738	clorgiline - MCF7	-0.269	2	-0.431	0.73641	0.8889	50
739	valinomycin - PC3	0.267	2	0.431	0.73721	0.8306	50
740	mefloquine - PC3	-0.268	2	-0.43	0.73854	0.7672	50
741	PHA-00767505E - PC3	0.264	2	0.43	0.73987	0.8914	50
742	nalidixic acid - MCF7	0.263	2	0.43	0.74067	0.5855	50
743	niclosamide - PC3	0.279	2	0.429	0.74108	0.8534	50
744	ioversol - MCF7	-0.181	2	-0.429	0.7414	0.7405	50
745	tremorine - MCF7	-0.118	2	-0.429	0.74234	0.8065	50
746	pyrimethamine - MCF7	0.231	2	0.429	0.74255	0.75	50
747	edrophonium chloride - MCF7	0.185	2	0.429	0.74337	0.5	50
748	flumetasone - PC3	-0.003	2	-0.428	0.74418	0.8353	50
749	beta-escin - PC3	0.271	2	0.428	0.74502	0.9073	50
750	gemfibrozil - MCF7	0.277	2	0.428	0.74502	0.7584	50
751	cyclopentolate - MCF7	0.205	2	0.428	0.74625	0.6387	50
752	lasalocid - MCF7	0.277	2	0.427	0.74711	0.9126	50
753	ketoprofen - PC3	-0.076	2	-0.427	0.74828	0.64	50
754	bupropion - MCF7	-0.064	2	-0.427	0.74919	0.7297	50
755	diltiazem - MCF7	-0.112	2	-0.426	0.75043	0.8047	50
756	diazoxide - PC3	-0.083	2	-0.426	0.75084	0.7306	50
757	guanadrel - PC3	0.276	2	0.426	0.75158	0.7546	50
758	gentamicin - PC3	0.275	2	0.426	0.75204	0.8834	50
759	dexibuprofen - MCF7	-0.045	2	-0.425	0.75496	0.6982	50
760	proxyphylline - MCF7	0.042	2	0.424	0.75607	0.5	50
761	trimethoprim - PC3	0.274	2	0.424	0.75832	0.8235	50
762	prednisone - MCF7	0.212	2	0.424	0.75882	0.7134	50
763	buspirone - MCF7	0.157	2	0.423	0.75943	0.6496	50
764	acebutolol - MCF7	0.064	2	0.423	0.75983	0.8239	50
765	alvespimycin - PC3	0.049	2	0.423	0.76114	0.7246	50
766	fendiline - MCF7	0.188	2	0.423	0.76114	0.9299	50
767	captopril - PC3	-0.038	2	-0.423	0.76188	0.7212	50
768	rotenone - PC3	0.15	2	0.422	0.76234	0.8187	50
769	cefamandole - PC3	0.273	2	0.422	0.76321	0.8729	50
770	nisoxetine - MCF7	-0.26	2	-0.422	0.76355	0.9032	50
771	acenocoumarol - PC3	0.082	2	0.421	0.76592	0.7679	50
772	clofibrate - MCF7	-0.186	2	-0.421	0.76609	0.6327	50
773	calcium folinate - PC3	-0.217	2	-0.42	0.76764	0.7467	50
774	hydrastine hydrochloride - MCF7	0.22	2	0.419	0.77073	0.6763	50
775	0316684-0000 - PC3	0.27	2	0.419	0.77116	0.8931	50
776	Prestwick-860 - MCF7	-0.258	2	-0.419	0.77238	0.8895	50
777	tridihexethyl - MCF7	0.109	2	0.419	0.77293	0.6667	50
778	florfenicol - MCF7	-0.149	2	-0.418	0.77353	0.8864	50
779	ethambutol - MCF7	-0.257	2	-0.418	0.77552	0.8967	50
780	midecamycin - MCF7	0.231	2	0.415	0.78341	0.6042	50
781	amprolium - PC3	0.266	2	0.415	0.78389	0.8671	50
782	5707885 - PC3	0.056	2	0.414	0.78506	0.8245	50
783	flutamide - PC3	-0.037	2	-0.413	0.78717	0.7736	50
784	oxybenzone - MCF7	0.264	2	0.413	0.78761	0.8788	50
785	nordihydroguaiaretic acid - ssMCF7	0.26	2	0.413	0.78816	0.8628	50
786	CP-645525-01 - MCF7	0.151	2	0.413	0.78892	0.9071	50
787	benzamil - PC3	-0.202	2	-0.412	0.78963	0.732	50
788	nadide - MCF7	0.196	2	0.412	0.79033	0.7295	50
789	4-hydroxyphenazone - PC3	0.064	2	0.412	0.79138	0.8067	50
790	oxamniquine - MCF7	0.232	2	0.412	0.79138	0.8389	50
791	etofylline - PC3	-0.059	2	-0.411	0.79246	0.7588	50
792	hecogenin - MCF7	0.076	2	0.411	0.79393	0.7679	50
793	sisomicin - MCF7	0.154	2	0.411	0.79393	0.5985	50
794	chlorhexidine - PC3	0.153	2	0.411	0.79443	0.8681	50
795	furosemide - MCF7	-0.052	2	-0.409	0.79796	0.7471	50
796	hyoscyamine - MCF7	-0.006	2	-0.408	0.79878	0.8383	50
797	cefotaxime - PC3	0.261	2	0.409	0.79924	0.8264	50
798	procyclidine - MCF7	-0.237	2	-0.408	0.80069	0.8988	50
799	metformin - PC3	0.26	2	0.408	0.8013	0.9464	50
800	flucloxacillin - MCF7	-0.037	2	-0.407	0.8018	0.8047	50
801	meteneprost - PC3	0.066	2	0.407	0.80349	0.9667	50
802	napelline - MCF7	-0.183	2	-0.406	0.80401	0.8323	50
803	dropropizine - MCF7	0.26	2	0.407	0.80437	0.9139	50
804	parbendazole - PC3	0.231	2	0.407	0.80474	0.7361	50
805	pindolol - MCF7	0.101	2	0.406	0.80572	0.8947	50
806	Prestwick-1084 - MCF7	-0.057	2	-0.406	0.80592	0.9654	50
807	ampyrone - PC3	0.234	2	0.406	0.80616	0.8333	50
808	thiethylperazine - MCF7	0.217	2	0.405	0.80888	0.7544	50
809	loracarbef - MCF7	0.115	2	0.405	0.80963	0.7947	50
810	tiabendazole - MCF7	0.175	2	0.404	0.81017	0.789	50
811	lansoprazole - MCF7	0.259	2	0.404	0.81105	0.8813	50
812	lithocholic acid - PC3	0.205	2	0.403	0.81166	0.8851	50
813	SC-19220 - MCF7	-0.102	2	-0.403	0.81196	0.8026	50
814	nitrofural - MCF7	0.258	2	0.403	0.81258	0.8221	50
815	ribavirin - MCF7	-0.008	2	-0.402	0.81389	0.7905	50
816	isoxicam - MCF7	0.214	2	0.402	0.8147	0.8827	50
817	practolol - MCF7	-0.169	2	-0.402	0.81574	0.8446	50
818	tetroquinone - MCF7	-0.238	2	-0.4	0.81892	0.9309	50
819	ciprofloxacin - PC3	0.124	2	0.4	0.81956	0.8403	50
820	metaraminol - MCF7	0.256	2	0.4	0.82156	0.7183	50
821	kawain - MCF7	0.166	2	0.399	0.82232	0.8177	50
822	methazolamide - MCF7	-0.055	2	-0.398	0.82343	0.8639	50
823	nicardipine - MCF7	-0.24	2	-0.398	0.82379	0.8	50
824	tolmetin - MCF7	-0.24	2	-0.398	0.82415	0.7115	50
825	raloxifene - HL60	-0.24	2	-0.398	0.82455	0.8012	50
826	stachydrine - MCF7	0.252	2	0.398	0.82562	0.9012	50
827	piperidolate - MCF7	0.211	2	0.398	0.82651	0.8473	50
828	enalapril - MCF7	-0.003	2	-0.397	0.82661	0.7706	50
829	anisomycin - MCF7	0.254	2	0.397	0.82884	0.9637	50
830	CP-319743 - PC3	0.254	2	0.396	0.82912	0.9184	50
831	doxazosin - MCF7	-0.157	2	-0.396	0.82952	0.9622	50
832	aciclovir - PC3	0.254	2	0.396	0.82999	0.9195	50
833	rifampicin - MCF7	0.253	2	0.396	0.83089	0.8742	50
834	oxaprozin - PC3	0.253	2	0.395	0.83186	0.8302	50
835	amantadine - MCF7	-0.053	2	-0.394	0.83294	0.898	50
836	colecalciferol - MCF7	0.184	2	0.395	0.83323	0.7817	50
837	levcycloserine - MCF7	0.253	2	0.395	0.83345	0.8562	50
838	etiocholanolone - PC3	0.251	2	0.394	0.83532	0.9398	50
839	betulin - MCF7	0.164	2	0.393	0.83614	0.7432	50
840	sulfabenzamide - MCF7	0.149	2	0.393	0.83765	0.8106	50
841	erythromycin - MCF7	0.25	2	0.392	0.83976	0.7956	50
842	hexamethonium bromide - MCF7	0.193	2	0.392	0.83976	0.8462	50
843	sulfametoxydiazine - MCF7	-0.009	2	-0.391	0.84059	0.9381	50
844	azacyclonol - PC3	-0.234	2	-0.391	0.84095	0.9204	50
845	Prestwick-1100 - MCF7	0.23	2	0.391	0.84202	0.817	50
846	orciprenaline - MCF7	0.236	2	0.391	0.84248	0.8503	50
847	netilmicin - MCF7	0.231	2	0.39	0.84367	0.8155	50
848	flunisolide - PC3	-0.232	2	-0.39	0.84377	0.9207	50
849	S-propranolol - MCF7	0.067	2	0.39	0.84405	0.6928	50
850	cefuroxime - MCF7	0.226	2	0.39	0.84443	0.7616	50
851	imipenem - MCF7	0.202	2	0.389	0.84512	0.8429	50
852	verapamil - PC3	0.028	2	0.389	0.84512	0.7133	50
853	ciprofloxacin - MCF7	-0.183	2	-0.388	0.84838	0.8621	50
854	procarbazine - MCF7	0.141	2	0.387	0.84932	0.8524	50
855	epirizole - MCF7	-0.208	2	-0.387	0.84991	0.9121	50
856	promethazine - MCF7	-0.179	2	-0.387	0.85037	0.9167	50
857	erastin - PC3	0.044	2	0.387	0.85079	0.8989	50
858	tolnaftate - MCF7	0.245	2	0.386	0.853	0.9713	50
859	Chicago Sky Blue 6B - MCF7	0.245	2	0.386	0.85335	0.8935	50
860	ornidazole - MCF7	0.045	2	0.385	0.85447	0.8045	50
861	leflunomide - MCF7	-0.045	2	-0.383	0.85904	0.9013	50
862	griseofulvin - PC3	-0.041	2	-0.383	0.8598	0.8589	50
863	estradiol - ssMCF7	0.242	2	0.382	0.86111	0.9068	50
864	aceclofenac - MCF7	0.207	2	0.381	0.86262	0.8378	50
865	CP-863187 - MCF7	-0.033	2	-0.381	0.86302	0.8839	50
866	cefaclor - MCF7	0.241	2	0.38	0.86367	0.9492	50
867	diprophylline - PC3	0.241	2	0.38	0.86483	0.8677	50
868	amiloride - MCF7	-0.053	2	-0.38	0.86524	0.9555	50
869	5182598 - MCF7	0.241	2	0.38	0.86538	0.9281	50
870	furazolidone - MCF7	0.122	2	0.379	0.86665	0.9214	50
871	MG-262 - PC3	0.24	2	0.378	0.86765	0.9579	50
872	dimenhydrinate - MCF7	0.239	2	0.378	0.86848	0.9689	50
873	isocorydine - MCF7	-0.195	2	-0.378	0.86992	0.9157	50
874	0173570-0000 - MCF7	0.205	2	0.376	0.87274	0.8508	50
875	sulpiride - MCF7	-0.048	2	-0.376	0.87339	0.9027	50
876	spironolactone - PC3	0.237	2	0.376	0.87347	0.8494	50
877	chlorambucil - MCF7	0.19	2	0.376	0.87413	0.8421	50
878	methanthelinium bromide - MCF7	0.006	2	-0.376	0.87417	0.8641	50
879	nomifensine - PC3	0.011	2	-0.373	0.8791	0.8323	50
880	trapidil - MCF7	-0.006	2	-0.373	0.87954	0.9361	50
881	betulinic acid - MCF7	0.235	2	0.373	0.8796	0.963	50
882	quinethazone - MCF7	0.217	2	0.373	0.8796	0.8496	50
883	famotidine - MCF7	0.149	2	0.373	0.87986	0.8611	50
884	ganciclovir - MCF7	0.057	2	0.373	0.88025	0.7899	50
885	erythromycin - PC3	0.023	2	0.372	0.88087	0.855	50
886	cefapirin - MCF7	0.233	2	0.37	0.88427	0.888	50
887	isocarboxazid - PC3	0.233	2	0.37	0.88473	0.913	50
888	Prestwick-1082 - MCF7	0.233	2	0.37	0.88507	0.9836	50
889	canadine - MCF7	0.233	2	0.369	0.8864	0.9796	50
890	capsaicin - MCF7	0.183	2	0.369	0.88803	0.94	50
891	diphemanil metilsulfate - MCF7	-0.031	2	-0.368	0.88914	0.8562	50
892	Prestwick-675 - PC3	0.231	2	0.368	0.89033	0.9106	50
893	pheneticillin - MCF7	-0.037	2	-0.367	0.89123	0.9543	50
894	mestranol - MCF7	-0.21	2	-0.366	0.89238	0.8955	50
895	merbromin - PC3	0.223	2	0.366	0.89256	0.968	50
896	metrizamide - MCF7	0.082	2	0.366	0.89302	0.925	50
897	CAY-10397 - PC3	0.033	2	0.365	0.89536	0.8406	50
898	fursultiamine - MCF7	0.229	2	0.364	0.89682	0.9477	50
899	sulfathiazole - MCF7	-0.039	2	-0.362	0.89898	0.8642	50
900	lisuride - MCF7	0.191	2	0.362	0.90079	0.9784	50
901	demecarium bromide - MCF7	0.227	2	0.362	0.90105	0.9419	50
902	cinchocaine - MCF7	0.022	2	0.361	0.9024	0.8808	50
903	terguride - PC3	-0.201	2	-0.36	0.90326	0.9125	50
904	chlorphenamine - MCF7	0.226	2	0.36	0.90363	0.9007	50
905	ethoxyquin - PC3	0.226	2	0.36	0.90389	0.9141	50
906	corbadrine - MCF7	-0.205	2	-0.359	0.90435	0.9432	50
907	15(S)-15-methylprostaglandin E2 - MCF7	0.141	2	0.36	0.90487	0.9222	50
908	cefoxitin - MCF7	0.225	2	0.358	0.90741	0.8509	50
909	ticlopidine - MCF7	0.166	2	0.358	0.90819	0.9734	50
910	nipecotic acid - MCF7	-0.203	2	-0.357	0.90843	0.9471	50
911	acebutolol - PC3	0.224	2	0.358	0.90855	0.8931	50
912	mexiletine - PC3	-0.052	2	-0.356	0.91081	0.9016	50
913	hydroxyzine - PC3	0.223	2	0.356	0.91246	0.9527	50
914	methoxsalen - MCF7	-0.014	2	-0.354	0.91294	0.8581	50
915	midodrine - MCF7	0.141	2	0.355	0.91306	0.8922	50
916	sulfadimethoxine - PC3	-0.008	2	-0.354	0.91332	0.9071	50
917	alimemazine - MCF7	0.017	2	-0.353	0.91447	0.9444	50
918	xamoterol - MCF7	0.179	2	0.354	0.91475	0.9779	50
919	cyanocobalamin - MCF7	0.192	2	0.354	0.91562	0.8372	50
920	dantrolene - PC3	0.22	2	0.352	0.91823	0.9518	50
921	bendroflumethiazide - PC3	0.03	2	0.352	0.91859	0.9221	50
922	baclofen - MCF7	0.171	2	0.351	0.91998	0.9815	50
923	meglumine - MCF7	0.005	2	-0.349	0.92121	0.9603	50
924	Prestwick-967 - MCF7	0.218	2	0.35	0.92155	0.9675	50
925	atractyloside - PC3	0.207	2	0.348	0.92346	0.9425	50
926	phenacetin - MCF7	-0.009	2	-0.347	0.92371	0.9444	50
927	cefamandole - MCF7	0.037	2	0.347	0.9256	0.9672	50
928	etilefrine - MCF7	0.175	2	0.347	0.9261	0.968	50
929	cefalotin - MCF7	-0.17	2	-0.345	0.92821	0.9212	50
930	acenocoumarol - MCF7	0.013	2	-0.344	0.92857	0.9586	50
931	cefotaxime - MCF7	0.132	2	0.344	0.93016	0.9048	50
932	metixene - MCF7	0.02	2	-0.343	0.93047	0.9068	50
933	alpha-yohimbine - MCF7	0.215	2	0.344	0.93115	0.9608	50
934	iopromide - MCF7	0.214	2	0.341	0.93457	0.9747	50
935	ketotifen - MCF7	0.152	2	0.341	0.9356	0.9838	50
936	ambroxol - MCF7	0.213	2	0.34	0.93606	0.983	50
937	IC-86621 - PC3	0.211	2	0.338	0.93894	0.9874	50
938	cyclic adenosine monophosphate - MCF7	-0.002	2	-0.336	0.93926	0.9625	50
939	levopropoxyphene - MCF7	0.051	2	0.336	0.94296	0.9884	50
940	bemegride - MCF7	0.208	2	0.335	0.9436	0.9891	50
941	vinblastine - MCF7	0.207	2	0.335	0.94461	0.9527	50
942	5279552 - MCF7	0.207	2	0.334	0.94539	0.9653	50
943	piribedil - MCF7	0.062	2	0.333	0.94708	0.9542	50
944	dicloxacillin - MCF7	0.191	2	0.332	0.94789	0.974	50
945	spiradoline - MCF7	0.132	2	0.331	0.94912	0.9881	50
946	myricetin - MCF7	0.19	2	0.331	0.94966	0.9894	50
947	estropipate - MCF7	0.204	2	0.329	0.95242	0.9588	50
948	oxetacaine - PC3	0.204	2	0.328	0.95264	0.9451	50
949	lymecycline - MCF7	-0.165	2	-0.323	0.95686	0.9762	50
950	mebeverine - MCF7	-0.032	2	-0.322	0.95793	0.974	50
951	pyrithyldione - MCF7	0.163	2	0.324	0.95853	0.9588	50
952	BCB000038 - PC3	0.2	2	0.323	0.95861	0.8929	50
953	thioproperazine - PC3	-0.158	2	-0.32	0.96085	0.96	50
954	chlormezanone - MCF7	0.198	2	0.321	0.96159	0.9815	50
955	levocabastine - MCF7	0.188	2	0.32	0.96171	0.9323	50
956	gallamine triethiodide - PC3	0.196	2	0.319	0.9636	0.9718	50
957	levobunolol - MCF7	0.146	2	0.319	0.9636	0.9623	50
958	tacrine - MCF7	0.195	2	0.317	0.96549	0.9108	50
959	oxolinic acid - PC3	0.194	2	0.316	0.96626	0.9796	50
960	lidocaine - MCF7	0.177	2	0.314	0.96815	0.982	50
961	chlorhexidine - MCF7	0.163	2	0.314	0.96891	0.9817	50
962	diprophylline - MCF7	0.192	2	0.313	0.96944	0.9704	50
963	monensin - PC3	0.19	2	0.311	0.97185	0.9944	50
964	diazoxide - MCF7	0.187	2	0.307	0.97507	0.9877	50
965	atropine oxide - MCF7	0.182	2	0.306	0.9759	0.994	50
966	levomepromazine - MCF7	0.183	2	0.302	0.97899	0.995	50
967	cinchonine - MCF7	0.18	2	0.298	0.98181	0.9936	50
968	gabexate - MCF7	0.179	2	0.298	0.98217	1	50
969	harmalol - MCF7	0.179	2	0.297	0.98227	1	50
970	mimosine - MCF7	0.138	2	0.297	0.983	0.9818	50
971	merbromin - MCF7	0.177	2	0.296	0.98328	1	50
972	disulfiram - PC3	0.174	2	0.293	0.98547	1	50
973	khellin - MCF7	0.131	2	0.293	0.98596	1	50
974	folic acid - MCF7	0.172	2	0.292	0.9865	0.994	50
975	dihydroergocristine - MCF7	0.171	2	0.291	0.98706	0.989	50
976	pralidoxime - MCF7	0.155	2	0.289	0.98809	0.9778	50
977	bacampicillin - MCF7	0.166	2	0.286	0.98988	0.9944	50
978	decamethonium bromide - MCF7	0.147	2	0.275	0.99495	1	50
979	Prestwick-642 - MCF7	0.117	2	0.268	0.99763	1	50
980	daunorubicin - PC3	-1	1	-1	---	---	100
981	podophyllotoxin - PC3	0.988	1	1	---	---	100
982	triprolidine - PC3	0.903	1	1	---	---	100
983	zoxazolamine - PC3	-0.864	1	-0.999	---	---	100
984	articaine - PC3	0.867	1	0.999	---	---	100
985	metrizamide - HL60	0.829	1	0.998	---	---	100
986	clorsulon - PC3	0.828	1	0.998	---	---	100
987	cefaclor - HL60	-0.801	1	-0.998	---	---	100
988	terconazole - PC3	0.825	1	0.998	---	---	100
989	ioxaglic acid - HL60	-0.798	1	-0.998	---	---	100
990	selegiline - PC3	0.813	1	0.998	---	---	100
991	pentoxyverine - HL60	-0.78	1	-0.998	---	---	100
992	naftifine - PC3	0.798	1	0.997	---	---	100
993	procaine - HL60	-0.773	1	-0.997	---	---	100
994	clorgiline - HL60	0.792	1	0.997	---	---	100
995	nocodazole - HL60	0.789	1	0.997	---	---	100
996	acetazolamide - PC3	0.787	1	0.996	---	---	100
997	Prestwick-972 - HL60	0.786	1	0.996	---	---	100
998	glibenclamide - PC3	-0.755	1	-0.996	---	---	100
999	brompheniramine - PC3	0.786	1	0.996	---	---	100
1000	zoxazolamine - HL60	-0.754	1	-0.996	---	---	100
1001	iloprost - SKMEL5	0.775	1	0.996	---	---	100
1002	levamisole - PC3	-0.754	1	-0.996	---	---	100
1003	probenecid - PC3	0.775	1	0.996	---	---	100
1004	amantadine - HL60	-0.75	1	-0.995	---	---	100
1005	triflupromazine - PC3	0.774	1	0.995	---	---	100
1006	hydralazine - HL60	0.77	1	0.995	---	---	100
1007	cephaeline - PC3	-0.749	1	-0.995	---	---	100
1008	chlorhexidine - HL60	0.769	1	0.995	---	---	100
1009	estropipate - PC3	0.768	1	0.995	---	---	100
1010	chlorphenesin - HL60	-0.747	1	-0.995	---	---	100
1011	podophyllotoxin - HL60	0.766	1	0.995	---	---	100
1012	acepromazine - HL60	-0.746	1	-0.995	---	---	100
1013	minoxidil - HL60	0.759	1	0.995	---	---	100
1014	ketotifen - PC3	0.758	1	0.994	---	---	100
1015	levamisole - HL60	-0.743	1	-0.994	---	---	100
1016	tocainide - HL60	-0.735	1	-0.994	---	---	100
1017	griseofulvin - HL60	0.755	1	0.994	---	---	100
1018	1,4-chrysenequinone - PC3	-0.733	1	-0.994	---	---	100
1019	N-acetyl-L-aspartic acid - PC3	0.754	1	0.994	---	---	100
1020	bretylium tosilate - PC3	-0.733	1	-0.994	---	---	100
1021	gliclazide - PC3	-0.728	1	-0.993	---	---	100
1022	hesperidin - HL60	0.75	1	0.993	---	---	100
1023	nizatidine - PC3	-0.727	1	-0.993	---	---	100
1024	fenbufen - HL60	0.749	1	0.993	---	---	100
1025	chlorphenamine - PC3	-0.727	1	-0.993	---	---	100
1026	fusidic acid - HL60	0.748	1	0.993	---	---	100
1027	chenodeoxycholic acid - PC3	0.747	1	0.992	---	---	100
1028	heliotrine - HL60	-0.726	1	-0.992	---	---	100
1029	piretanide - PC3	0.745	1	0.992	---	---	100
1030	butyl hydroxybenzoate - PC3	-0.724	1	-0.992	---	---	100
1031	sulfamonomethoxine - HL60	-0.722	1	-0.992	---	---	100
1032	levothyroxine sodium - HL60	0.739	1	0.992	---	---	100
1033	tolazamide - PC3	0.737	1	0.991	---	---	100
1034	physostigmine - HL60	-0.718	1	-0.991	---	---	100
1035	mebhydrolin - PC3	0.737	1	0.991	---	---	100
1036	piribedil - PC3	-0.718	1	-0.991	---	---	100
1037	imipramine - PC3	0.735	1	0.991	---	---	100
1038	bupropion - HL60	-0.713	1	-0.991	---	---	100
1039	terbutaline - PC3	0.735	1	0.991	---	---	100
1040	(+)-chelidonine - PC3	0.726	1	0.991	---	---	100
1041	aminohippuric acid - PC3	-0.706	1	-0.99	---	---	100
1042	memantine - PC3	0.723	1	0.99	---	---	100
1043	myricetin - HL60	0.722	1	0.99	---	---	100
1044	sulfamonomethoxine - PC3	0.722	1	0.99	---	---	100
1045	clomifene - HL60	0.721	1	0.99	---	---	100
1046	spiperone - PC3	0.719	1	0.99	---	---	100
1047	mexiletine - HL60	0.719	1	0.99	---	---	100
1048	loxapine - PC3	0.718	1	0.989	---	---	100
1049	protoveratrine A - HL60	-0.691	1	-0.989	---	---	100
1050	benzthiazide - HL60	0.716	1	0.989	---	---	100
1051	butirosin - PC3	-0.69	1	-0.989	---	---	100
1052	midecamycin - HL60	-0.689	1	-0.989	---	---	100
1053	paclitaxel - HL60	0.715	1	0.989	---	---	100
1054	diloxanide - HL60	-0.689	1	-0.988	---	---	100
1055	monastrol - PC3	-0.688	1	-0.988	---	---	100
1056	atropine - PC3	-0.687	1	-0.988	---	---	100
1057	ritodrine - HL60	0.711	1	0.988	---	---	100
1058	nicardipine - HL60	0.71	1	0.988	---	---	100
1059	tetracycline - HL60	-0.681	1	-0.987	---	---	100
1060	dequalinium chloride - PC3	-0.68	1	-0.987	---	---	100
1061	nefopam - HL60	0.707	1	0.987	---	---	100
1062	atropine oxide - HL60	0.706	1	0.987	---	---	100
1063	hydroxyzine - HL60	-0.68	1	-0.987	---	---	100
1064	dilazep - HL60	0.705	1	0.987	---	---	100
1065	ampicillin - HL60	-0.679	1	-0.986	---	---	100
1066	hexetidine - PC3	0.705	1	0.986	---	---	100
1067	zidovudine - HL60	0.703	1	0.986	---	---	100
1068	fusaric acid - PC3	0.703	1	0.986	---	---	100
1069	ciclopirox - HL60	0.702	1	0.986	---	---	100
1070	cisapride - HL60	0.702	1	0.986	---	---	100
1071	adenosine phosphate - HL60	0.702	1	0.985	---	---	100
1072	canavanine - HL60	-0.673	1	-0.985	---	---	100
1073	nefopam - PC3	0.699	1	0.985	---	---	100
1074	vinburnine - PC3	0.697	1	0.985	---	---	100
1075	Prestwick-665 - HL60	-0.672	1	-0.985	---	---	100
1076	bethanechol - PC3	0.695	1	0.984	---	---	100
1077	zomepirac - PC3	-0.672	1	-0.984	---	---	100
1078	3-acetamidocoumarin - HL60	-0.67	1	-0.984	---	---	100
1079	N-acetyl-L-aspartic acid - HL60	0.692	1	0.984	---	---	100
1080	pepstatin - PC3	0.691	1	0.984	---	---	100
1081	nystatin - MCF7	-0.669	1	-0.984	---	---	100
1082	tubocurarine chloride - HL60	-0.669	1	-0.983	---	---	100
1083	etifenin - HL60	-0.669	1	-0.983	---	---	100
1084	econazole - HL60	0.688	1	0.983	---	---	100
1085	seneciphylline - HL60	0.687	1	0.983	---	---	100
1086	homochlorcyclizine - PC3	0.687	1	0.983	---	---	100
1087	phenacetin - PC3	-0.667	1	-0.983	---	---	100
1088	gabapentin - PC3	-0.667	1	-0.982	---	---	100
1089	ampicillin - PC3	-0.666	1	-0.982	---	---	100
1090	cefixime - PC3	-0.665	1	-0.982	---	---	100
1091	spiramycin - HL60	0.684	1	0.982	---	---	100
1092	ciclosporin - PC3	0.683	1	0.982	---	---	100
1093	buflomedil - HL60	-0.665	1	-0.982	---	---	100
1094	lycorine - HL60	0.683	1	0.982	---	---	100
1095	zuclopenthixol - PC3	-0.665	1	-0.981	---	---	100
1096	cyanocobalamin - PC3	-0.665	1	-0.981	---	---	100
1097	alfuzosin - HL60	0.682	1	0.981	---	---	100
1098	doxycycline - HL60	-0.664	1	-0.981	---	---	100
1099	SC-560 - PC3	0.681	1	0.981	---	---	100
1100	carbamazepine - HL60	-0.663	1	-0.981	---	---	100
1101	amiodarone - HL60	-0.663	1	-0.981	---	---	100
1102	aminophylline - PC3	-0.662	1	-0.98	---	---	100
1103	levocabastine - PC3	0.68	1	0.98	---	---	100
1104	tetrandrine - HL60	0.678	1	0.98	---	---	100
1105	neomycin - HL60	0.675	1	0.98	---	---	100
1106	proxymetacaine - PC3	-0.658	1	-0.979	---	---	100
1107	trimethylcolchicinic acid - PC3	0.669	1	0.979	---	---	100
1108	galantamine - PC3	0.667	1	0.979	---	---	100
1109	chlormezanone - HL60	-0.657	1	-0.979	---	---	100
1110	flutamide - HL60	0.664	1	0.978	---	---	100
1111	amrinone - HL60	-0.654	1	-0.977	---	---	100
1112	tropine - HL60	0.664	1	0.977	---	---	100
1113	cefalexin - HL60	-0.653	1	-0.977	---	---	100
1114	remoxipride - PC3	-0.653	1	-0.977	---	---	100
1115	telenzepine - PC3	-0.651	1	-0.977	---	---	100
1116	tetrahydroalstonine - PC3	0.662	1	0.977	---	---	100
1117	phthalylsulfathiazole - PC3	-0.651	1	-0.977	---	---	100
1118	metixene - HL60	-0.65	1	-0.977	---	---	100
1119	isoflupredone - PC3	0.661	1	0.976	---	---	100
1120	wortmannin - SKMEL5	-0.65	1	-0.976	---	---	100
1121	levodopa - HL60	-0.649	1	-0.976	---	---	100
1122	bretylium tosilate - HL60	-0.649	1	-0.976	---	---	100
1123	dobutamine - HL60	0.657	1	0.976	---	---	100
1124	etacrynic acid - HL60	-0.649	1	-0.976	---	---	100
1125	prenylamine - HL60	0.657	1	0.975	---	---	100
1126	4-hydroxyphenazone - HL60	0.654	1	0.975	---	---	100
1127	tubocurarine chloride - PC3	-0.648	1	-0.975	---	---	100
1128	alprenolol - HL60	-0.647	1	-0.975	---	---	100
1129	cloxacillin - PC3	-0.646	1	-0.975	---	---	100
1130	selegiline - HL60	-0.646	1	-0.975	---	---	100
1131	guanfacine - HL60	0.652	1	0.974	---	---	100
1132	isosorbide - PC3	0.651	1	0.974	---	---	100
1133	tiaprofenic acid - PC3	-0.645	1	-0.974	---	---	100
1134	cefotaxime - HL60	-0.644	1	-0.974	---	---	100
1135	flecainide - HL60	0.651	1	0.974	---	---	100
1136	pergolide - PC3	0.651	1	0.974	---	---	100
1137	chlorogenic acid - PC3	0.647	1	0.973	---	---	100
1138	digoxigenin - PC3	0.646	1	0.973	---	---	100
1139	ethambutol - HL60	-0.641	1	-0.973	---	---	100
1140	piracetam - PC3	-0.641	1	-0.973	---	---	100
1141	clotrimazole - PC3	0.645	1	0.972	---	---	100
1142	sulconazole - PC3	-0.64	1	-0.972	---	---	100
1143	fenspiride - HL60	-0.64	1	-0.972	---	---	100
1144	pyrithyldione - PC3	0.645	1	0.972	---	---	100
1145	cloxacillin - HL60	-0.639	1	-0.972	---	---	100
1146	epitiostanol - PC3	0.644	1	0.972	---	---	100
1147	procarbazine - HL60	0.643	1	0.972	---	---	100
1148	raubasine - PC3	0.643	1	0.972	---	---	100
1149	racecadotril - PC3	0.643	1	0.972	---	---	100
1150	trimethylcolchicinic acid - HL60	0.642	1	0.971	---	---	100
1151	L-methionine sulfoximine - PC3	0.641	1	0.971	---	---	100
1152	metolazone - HL60	-0.635	1	-0.971	---	---	100
1153	anisomycin - HL60	0.641	1	0.971	---	---	100
1154	thiocolchicoside - PC3	-0.635	1	-0.971	---	---	100
1155	bephenium hydroxynaphthoate - HL60	-0.634	1	-0.971	---	---	100
1156	pentoxifylline - HL60	0.64	1	0.971	---	---	100
1157	PHA-00665752 - MCF7	-0.634	1	-0.971	---	---	100
1158	doxepin - PC3	-0.634	1	-0.971	---	---	100
1159	khellin - HL60	0.637	1	0.971	---	---	100
1160	gliquidone - HL60	0.636	1	0.97	---	---	100
1161	ketorolac - PC3	-0.634	1	-0.97	---	---	100
1162	imatinib - PC3	0.636	1	0.97	---	---	100
1163	praziquantel - PC3	-0.633	1	-0.97	---	---	100
1164	chlorphenamine - HL60	0.636	1	0.97	---	---	100
1165	nabumetone - PC3	-0.632	1	-0.97	---	---	100
1166	benzocaine - PC3	-0.632	1	-0.97	---	---	100
1167	dextromethorphan - PC3	-0.631	1	-0.97	---	---	100
1168	levopropoxyphene - PC3	-0.631	1	-0.969	---	---	100
1169	bufexamac - HL60	0.633	1	0.969	---	---	100
1170	roxarsone - PC3	-0.631	1	-0.969	---	---	100
1171	nortriptyline - HL60	0.633	1	0.969	---	---	100
1172	molindone - PC3	0.633	1	0.969	---	---	100
1173	letrozole - PC3	0.633	1	0.969	---	---	100
1174	sulfacetamide - HL60	-0.628	1	-0.969	---	---	100
1175	cinchonine - PC3	0.633	1	0.969	---	---	100
1176	papaverine - HL60	-0.627	1	-0.969	---	---	100
1177	ifenprodil - PC3	-0.627	1	-0.968	---	---	100
1178	chlorzoxazone - PC3	-0.626	1	-0.968	---	---	100
1179	prednisolone - HL60	0.632	1	0.968	---	---	100
1180	canavanine - MCF7	-0.626	1	-0.968	---	---	100
1181	corynanthine - PC3	0.632	1	0.968	---	---	100
1182	disopyramide - HL60	0.631	1	0.968	---	---	100
1183	chlorpropamide - PC3	-0.623	1	-0.967	---	---	100
1184	theophylline - PC3	0.63	1	0.967	---	---	100
1185	colchicine - HL60	0.63	1	0.967	---	---	100
1186	ronidazole - PC3	-0.623	1	-0.967	---	---	100
1187	anisomycin - PC3	0.629	1	0.967	---	---	100
1188	apigenin - PC3	-0.621	1	-0.967	---	---	100
1189	etacrynic acid - PC3	-0.62	1	-0.967	---	---	100
1190	physostigmine - PC3	0.628	1	0.966	---	---	100
1191	procainamide - HL60	0.627	1	0.966	---	---	100
1192	naftopidil - PC3	0.627	1	0.966	---	---	100
1193	clemizole - HL60	-0.618	1	-0.966	---	---	100
1194	harpagoside - HL60	-0.617	1	-0.965	---	---	100
1195	sulfasalazine - HL60	0.626	1	0.965	---	---	100
1196	aconitine - PC3	0.626	1	0.965	---	---	100
1197	etidronic acid - PC3	-0.617	1	-0.965	---	---	100
1198	dosulepin - PC3	0.625	1	0.965	---	---	100
1199	emetine - HL60	-0.616	1	-0.965	---	---	100
1200	ganciclovir - PC3	-0.616	1	-0.965	---	---	100
1201	10-methoxyharmalan - HL60	0.624	1	0.965	---	---	100
1202	atropine - HL60	-0.615	1	-0.964	---	---	100
1203	sulindac - HL60	-0.613	1	-0.964	---	---	100
1204	azapropazone - MCF7	-0.613	1	-0.964	---	---	100
1205	benzathine benzylpenicillin - PC3	0.622	1	0.964	---	---	100
1206	nisoxetine - HL60	-0.613	1	-0.964	---	---	100
1207	amoxicillin - PC3	-0.612	1	-0.964	---	---	100
1208	acetylsalicylsalicylic acid - PC3	-0.612	1	-0.963	---	---	100
1209	Prestwick-1084 - PC3	-0.611	1	-0.963	---	---	100
1210	bufexamac - PC3	-0.611	1	-0.963	---	---	100
1211	folic acid - PC3	0.618	1	0.963	---	---	100
1212	disopyramide - PC3	0.618	1	0.962	---	---	100
1213	pridinol - PC3	-0.609	1	-0.962	---	---	100
1214	tribenoside - HL60	0.618	1	0.962	---	---	100
1215	praziquantel - HL60	0.617	1	0.962	---	---	100
1216	ciprofloxacin - HL60	-0.607	1	-0.962	---	---	100
1217	cefepime - PC3	0.617	1	0.961	---	---	100
1218	methocarbamol - PC3	-0.606	1	-0.961	---	---	100
1219	tiapride - HL60	0.616	1	0.961	---	---	100
1220	cefalonium - PC3	0.616	1	0.961	---	---	100
1221	lansoprazole - PC3	-0.604	1	-0.96	---	---	100
1222	biotin - HL60	-0.604	1	-0.96	---	---	100
1223	chlortalidone - PC3	0.615	1	0.96	---	---	100
1224	vigabatrin - MCF7	0.614	1	0.96	---	---	100
1225	cinchonine - HL60	-0.602	1	-0.96	---	---	100
1226	mefexamide - PC3	0.614	1	0.96	---	---	100
1227	neostigmine bromide - PC3	-0.602	1	-0.959	---	---	100
1228	strophanthidin - PC3	0.613	1	0.959	---	---	100
1229	Prestwick-1085 - HL60	0.613	1	0.959	---	---	100
1230	trichlormethiazide - PC3	0.612	1	0.959	---	---	100
1231	S-propranolol - PC3	-0.601	1	-0.959	---	---	100
1232	paracetamol - PC3	-0.601	1	-0.959	---	---	100
1233	clioquinol - HL60	0.61	1	0.958	---	---	100
1234	racecadotril - HL60	-0.6	1	-0.958	---	---	100
1235	ramipril - HL60	-0.6	1	-0.958	---	---	100
1236	atovaquone - HL60	-0.6	1	-0.958	---	---	100
1237	domperidone - PC3	0.609	1	0.958	---	---	100
1238	Prestwick-692 - PC3	0.609	1	0.958	---	---	100
1239	dienestrol - PC3	0.608	1	0.958	---	---	100
1240	zalcitabine - PC3	-0.599	1	-0.958	---	---	100
1241	piracetam - HL60	0.608	1	0.957	---	---	100
1242	doxylamine - HL60	0.608	1	0.957	---	---	100
1243	oxybutynin - PC3	-0.598	1	-0.957	---	---	100
1244	tetrahydroalstonine - HL60	0.606	1	0.956	---	---	100
1245	corticosterone - PC3	0.606	1	0.956	---	---	100
1246	oxolinic acid - HL60	-0.597	1	-0.956	---	---	100
1247	erythromycin - HL60	-0.596	1	-0.956	---	---	100
1248	pronetalol - PC3	0.605	1	0.956	---	---	100
1249	R-atenolol - PC3	-0.595	1	-0.956	---	---	100
1250	bemegride - PC3	-0.595	1	-0.956	---	---	100
1251	androsterone - PC3	0.603	1	0.955	---	---	100
1252	cefmetazole - PC3	-0.595	1	-0.955	---	---	100
1253	oxedrine - HL60	0.602	1	0.955	---	---	100
1254	tiabendazole - HL60	-0.594	1	-0.955	---	---	100
1255	alfadolone - PC3	0.6	1	0.955	---	---	100
1256	piperlongumine - HL60	-0.594	1	-0.955	---	---	100
1257	bicuculline - PC3	0.599	1	0.954	---	---	100
1258	naftifine - HL60	-0.593	1	-0.954	---	---	100
1259	diloxanide - PC3	-0.593	1	-0.954	---	---	100
1260	indoprofen - HL60	0.597	1	0.953	---	---	100
1261	mephenytoin - PC3	0.596	1	0.953	---	---	100
1262	pirenzepine - HL60	-0.592	1	-0.953	---	---	100
1263	azapropazone - PC3	0.596	1	0.953	---	---	100
1264	mometasone - HL60	0.596	1	0.953	---	---	100
1265	ribostamycin - PC3	-0.591	1	-0.953	---	---	100
1266	hydrocotarnine - PC3	0.596	1	0.953	---	---	100
1267	pepstatin - HL60	-0.591	1	-0.953	---	---	100
1268	flucytosine - HL60	0.596	1	0.952	---	---	100
1269	luteolin - PC3	-0.59	1	-0.952	---	---	100
1270	N-acetylmuramic acid - HL60	0.596	1	0.952	---	---	100
1271	minocycline - PC3	-0.59	1	-0.952	---	---	100
1272	latamoxef - PC3	-0.59	1	-0.952	---	---	100
1273	amiprilose - PC3	0.594	1	0.951	---	---	100
1274	SR-95531 - HL60	0.593	1	0.951	---	---	100
1275	clorgiline - PC3	-0.584	1	-0.951	---	---	100
1276	indapamide - HL60	0.593	1	0.951	---	---	100
1277	betamethasone - PC3	0.592	1	0.951	---	---	100
1278	pivampicillin - PC3	-0.583	1	-0.951	---	---	100
1279	rimexolone - PC3	-0.583	1	-0.95	---	---	100
1280	pentetic acid - PC3	0.592	1	0.95	---	---	100
1281	cinnarizine - HL60	-0.578	1	-0.95	---	---	100
1282	beclometasone - PC3	0.59	1	0.949	---	---	100
1283	pentoxyverine - PC3	-0.575	1	-0.949	---	---	100
1284	3-hydroxy-DL-kynurenine - HL60	0.59	1	0.949	---	---	100
1285	niflumic acid - PC3	-0.575	1	-0.949	---	---	100
1286	josamycin - HL60	-0.574	1	-0.949	---	---	100
1287	tamoxifen - HL60	0.589	1	0.949	---	---	100
1288	perphenazine - HL60	0.589	1	0.949	---	---	100
1289	benfotiamine - PC3	-0.573	1	-0.948	---	---	100
1290	astemizole - HL60	0.587	1	0.948	---	---	100
1291	lorglumide - PC3	-0.573	1	-0.948	---	---	100
1292	terfenadine - HL60	0.587	1	0.948	---	---	100
1293	rifampicin - PC3	0.587	1	0.948	---	---	100
1294	cotinine - HL60	-0.571	1	-0.947	---	---	100
1295	pimozide - HL60	-0.57	1	-0.947	---	---	100
1296	practolol - HL60	0.586	1	0.947	---	---	100
1297	doxepin - MCF7	0.586	1	0.947	---	---	100
1298	calcium pantothenate - HL60	-0.569	1	-0.947	---	---	100
1299	lasalocid - PC3	0.584	1	0.946	---	---	100
1300	leflunomide - PC3	-0.568	1	-0.946	---	---	100
1301	etofenamate - PC3	-0.568	1	-0.946	---	---	100
1302	octopamine - HL60	0.584	1	0.946	---	---	100
1303	H-89 - MCF7	-0.566	1	-0.945	---	---	100
1304	diperodon - PC3	0.583	1	0.945	---	---	100
1305	oxybuprocaine - HL60	0.582	1	0.945	---	---	100
1306	trihexyphenidyl - PC3	0.582	1	0.945	---	---	100
1307	atracurium besilate - PC3	0.582	1	0.944	---	---	100
1308	cefapirin - PC3	-0.564	1	-0.944	---	---	100
1309	dimenhydrinate - HL60	0.579	1	0.944	---	---	100
1310	cefsulodin - PC3	-0.562	1	-0.943	---	---	100
1311	3-acetamidocoumarin - PC3	0.577	1	0.943	---	---	100
1312	spironolactone - HL60	-0.562	1	-0.943	---	---	100
1313	furosemide - PC3	0.576	1	0.943	---	---	100
1314	acetylsalicylsalicylic acid - HL60	0.575	1	0.942	---	---	100
1315	yohimbine - HL60	-0.561	1	-0.942	---	---	100
1316	cyclobenzaprine - PC3	0.575	1	0.942	---	---	100
1317	nipecotic acid - PC3	-0.561	1	-0.942	---	---	100
1318	xylometazoline - HL60	-0.56	1	-0.942	---	---	100
1319	rolipram - PC3	0.575	1	0.942	---	---	100
1320	thiethylperazine - HL60	-0.559	1	-0.942	---	---	100
1321	harmine - HL60	-0.559	1	-0.941	---	---	100
1322	fenoterol - PC3	-0.559	1	-0.941	---	---	100
1323	kaempferol - PC3	0.574	1	0.941	---	---	100
1324	pregnenolone - PC3	-0.559	1	-0.941	---	---	100
1325	azathioprine - HL60	-0.558	1	-0.941	---	---	100
1326	adrenosterone - PC3	-0.557	1	-0.941	---	---	100
1327	harmol - PC3	-0.556	1	-0.94	---	---	100
1328	epivincamine - PC3	0.572	1	0.94	---	---	100
1329	imidurea - PC3	-0.556	1	-0.94	---	---	100
1330	tolfenamic acid - HL60	-0.555	1	-0.94	---	---	100
1331	betaxolol - HL60	0.571	1	0.94	---	---	100
1332	convolamine - HL60	-0.553	1	-0.939	---	---	100
1333	iocetamic acid - PC3	0.57	1	0.939	---	---	100
1334	Prestwick-981 - HL60	0.57	1	0.939	---	---	100
1335	nimesulide - HL60	-0.552	1	-0.939	---	---	100
1336	desipramine - HL60	0.569	1	0.939	---	---	100
1337	lanatoside C - HL60	-0.552	1	-0.939	---	---	100
1338	puromycin - HL60	-0.551	1	-0.939	---	---	100
1339	timolol - PC3	0.569	1	0.938	---	---	100
1340	ciprofibrate - PC3	0.568	1	0.938	---	---	100
1341	nomegestrol - PC3	0.568	1	0.938	---	---	100
1342	Prestwick-642 - HL60	0.567	1	0.938	---	---	100
1343	oxamic acid - MCF7	-0.547	1	-0.937	---	---	100
1344	phenindione - HL60	0.566	1	0.937	---	---	100
1345	iopanoic acid - PC3	-0.546	1	-0.937	---	---	100
1346	solanine - PC3	0.566	1	0.937	---	---	100
1347	prazosin - PC3	0.566	1	0.936	---	---	100
1348	pyrithyldione - HL60	-0.546	1	-0.936	---	---	100
1349	mevalolactone - MCF7	0.565	1	0.936	---	---	100
1350	doxazosin - PC3	-0.545	1	-0.936	---	---	100
1351	strophanthidin - HL60	0.565	1	0.935	---	---	100
1352	benzydamine - HL60	-0.545	1	-0.935	---	---	100
1353	promethazine - PC3	0.565	1	0.935	---	---	100
1354	chlorpropamide - HL60	0.565	1	0.935	---	---	100
1355	lymecycline - PC3	-0.544	1	-0.935	---	---	100
1356	staurosporine - SKMEL5	-0.543	1	-0.935	---	---	100
1357	mercaptopurine - PC3	-0.543	1	-0.934	---	---	100
1358	clofazimine - PC3	0.562	1	0.934	---	---	100
1359	isotretinoin - PC3	-0.542	1	-0.933	---	---	100
1360	trimethoprim - HL60	0.562	1	0.933	---	---	100
1361	amikacin - HL60	0.562	1	0.933	---	---	100
1362	corbadrine - PC3	-0.541	1	-0.933	---	---	100
1363	disulfiram - HL60	0.561	1	0.933	---	---	100
1364	ebselen - PC3	-0.541	1	-0.933	---	---	100
1365	minaprine - HL60	0.561	1	0.933	---	---	100
1366	artemisinin - PC3	-0.541	1	-0.932	---	---	100
1367	scoulerine - HL60	0.56	1	0.932	---	---	100
1368	alfadolone - HL60	0.56	1	0.932	---	---	100
1369	stachydrine - PC3	-0.54	1	-0.932	---	---	100
1370	kinetin - PC3	0.559	1	0.931	---	---	100
1371	mebeverine - HL60	-0.538	1	-0.931	---	---	100
1372	methapyrilene - HL60	0.559	1	0.931	---	---	100
1373	florfenicol - HL60	0.559	1	0.931	---	---	100
1374	guanethidine - HL60	-0.537	1	-0.931	---	---	100
1375	oxedrine - PC3	-0.537	1	-0.931	---	---	100
1376	tocainide - PC3	0.559	1	0.931	---	---	100
1377	gabexate - PC3	-0.536	1	-0.93	---	---	100
1378	sisomicin - PC3	0.558	1	0.93	---	---	100
1379	tridihexethyl - PC3	-0.535	1	-0.93	---	---	100
1380	acemetacin - PC3	0.557	1	0.93	---	---	100
1381	denatonium benzoate - PC3	-0.535	1	-0.93	---	---	100
1382	N6-methyladenosine - PC3	0.557	1	0.93	---	---	100
1383	chloroquine - PC3	-0.535	1	-0.93	---	---	100
1384	propafenone - PC3	-0.534	1	-0.929	---	---	100
1385	xylometazoline - PC3	-0.534	1	-0.929	---	---	100
1386	hemicholinium - PC3	0.557	1	0.929	---	---	100
1387	5186324 - MCF7	0.556	1	0.929	---	---	100
1388	furaltadone - HL60	0.555	1	0.928	---	---	100
1389	sulfamethoxypyridazine - PC3	-0.532	1	-0.928	---	---	100
1390	methyldopa - PC3	0.555	1	0.928	---	---	100
1391	oxprenolol - PC3	-0.532	1	-0.928	---	---	100
1392	diethylcarbamazine - PC3	-0.531	1	-0.928	---	---	100
1393	artemisinin - HL60	0.555	1	0.928	---	---	100
1394	phenindione - PC3	-0.53	1	-0.928	---	---	100
1395	calycanthine - PC3	0.555	1	0.928	---	---	100
1396	monorden - SKMEL5	0.554	1	0.927	---	---	100
1397	ivermectin - HL60	0.554	1	0.927	---	---	100
1398	CAY-10397 - MCF7	-0.528	1	-0.927	---	---	100
1399	2-aminobenzenesulfonamide - PC3	0.552	1	0.926	---	---	100
1400	hydroquinine - PC3	0.551	1	0.926	---	---	100
1401	alpha-yohimbine - PC3	0.55	1	0.925	---	---	100
1402	furazolidone - HL60	-0.525	1	-0.925	---	---	100
1403	clofilium tosylate - PC3	0.549	1	0.925	---	---	100
1404	picrotoxinin - PC3	-0.525	1	-0.925	---	---	100
1405	benperidol - PC3	0.549	1	0.925	---	---	100
1406	viomycin - PC3	0.549	1	0.925	---	---	100
1407	amiodarone - PC3	-0.525	1	-0.925	---	---	100
1408	antazoline - HL60	-0.524	1	-0.924	---	---	100
1409	abamectin - PC3	-0.524	1	-0.924	---	---	100
1410	clidinium bromide - HL60	-0.524	1	-0.924	---	---	100
1411	naltrexone - HL60	0.549	1	0.924	---	---	100
1412	thioperamide - HL60	-0.523	1	-0.924	---	---	100
1413	karakoline - HL60	0.548	1	0.924	---	---	100
1414	quinpirole - HL60	0.548	1	0.923	---	---	100
1415	tolfenamic acid - MCF7	-0.522	1	-0.923	---	---	100
1416	trioxysalen - PC3	-0.521	1	-0.923	---	---	100
1417	cefotetan - PC3	0.547	1	0.923	---	---	100
1418	tetramisole - PC3	0.547	1	0.922	---	---	100
1419	metergoline - PC3	0.546	1	0.922	---	---	100
1420	ozagrel - PC3	-0.519	1	-0.922	---	---	100
1421	celecoxib - PC3	0.545	1	0.922	---	---	100
1422	decamethonium bromide - PC3	-0.518	1	-0.922	---	---	100
1423	diphenylpyraline - HL60	-0.517	1	-0.921	---	---	100
1424	sertaconazole - PC3	-0.517	1	-0.92	---	---	100
1425	ellipticine - HL60	-0.517	1	-0.92	---	---	100
1426	lasalocid - HL60	0.543	1	0.92	---	---	100
1427	ceforanide - PC3	-0.517	1	-0.92	---	---	100
1428	noscapine - PC3	-0.517	1	-0.92	---	---	100
1429	arecoline - PC3	0.541	1	0.919	---	---	100
1430	cefuroxime - HL60	-0.516	1	-0.919	---	---	100
1431	dorzolamide - PC3	-0.515	1	-0.919	---	---	100
1432	dihydrostreptomycin - HL60	0.538	1	0.918	---	---	100
1433	tridihexethyl - HL60	-0.514	1	-0.918	---	---	100
1434	etamsylate - PC3	-0.513	1	-0.918	---	---	100
1435	tropine - PC3	0.538	1	0.918	---	---	100
1436	butoconazole - HL60	0.538	1	0.918	---	---	100
1437	isopropamide iodide - PC3	-0.513	1	-0.918	---	---	100
1438	captopril - HL60	-0.513	1	-0.918	---	---	100
1439	phenformin - HL60	0.536	1	0.917	---	---	100
1440	alimemazine - HL60	-0.513	1	-0.917	---	---	100
1441	theobromine - HL60	0.535	1	0.917	---	---	100
1442	nomifensine - HL60	0.535	1	0.917	---	---	100
1443	dexpropranolol - PC3	-0.511	1	-0.916	---	---	100
1444	sulfamethizole - HL60	-0.511	1	-0.916	---	---	100
1445	Prestwick-1082 - PC3	0.534	1	0.916	---	---	100
1446	pheneticillin - PC3	0.534	1	0.916	---	---	100
1447	primaquine - PC3	-0.51	1	-0.916	---	---	100
1448	dexpanthenol - PC3	0.534	1	0.916	---	---	100
1449	cyclopenthiazide - PC3	-0.509	1	-0.915	---	---	100
1450	mianserin - HL60	-0.509	1	-0.915	---	---	100
1451	meglumine - PC3	-0.507	1	-0.914	---	---	100
1452	felbinac - PC3	0.53	1	0.914	---	---	100
1453	fasudil - MCF7	0.53	1	0.914	---	---	100
1454	thiostrepton - PC3	-0.507	1	-0.914	---	---	100
1455	folic acid - HL60	-0.506	1	-0.914	---	---	100
1456	caffeic acid - MCF7	-0.506	1	-0.913	---	---	100
1457	fenofibrate - HL60	0.529	1	0.913	---	---	100
1458	bicuculline - HL60	0.529	1	0.913	---	---	100
1459	tyloxapol - PC3	-0.505	1	-0.913	---	---	100
1460	cycloserine - PC3	-0.504	1	-0.913	---	---	100
1461	Prestwick-920 - PC3	-0.503	1	-0.912	---	---	100
1462	metronidazole - HL60	-0.503	1	-0.912	---	---	100
1463	quercetin - PC3	-0.502	1	-0.911	---	---	100
1464	guanfacine - PC3	-0.501	1	-0.911	---	---	100
1465	droperidol - HL60	0.525	1	0.911	---	---	100
1466	prednisolone - PC3	-0.501	1	-0.911	---	---	100
1467	diflorasone - PC3	0.525	1	0.91	---	---	100
1468	kanamycin - PC3	-0.5	1	-0.91	---	---	100
1469	dacarbazine - PC3	0.525	1	0.91	---	---	100
1470	berberine - PC3	-0.5	1	-0.91	---	---	100
1471	acacetin - HL60	0.524	1	0.909	---	---	100
1472	oxamniquine - PC3	0.524	1	0.909	---	---	100
1473	kaempferol - HL60	0.524	1	0.909	---	---	100
1474	testosterone - HL60	-0.496	1	-0.909	---	---	100
1475	chlorphenesin - PC3	-0.495	1	-0.909	---	---	100
1476	loxapine - HL60	0.523	1	0.909	---	---	100
1477	cyproterone - PC3	-0.495	1	-0.908	---	---	100
1478	pizotifen - PC3	0.522	1	0.908	---	---	100
1479	hydrastine hydrochloride - HL60	-0.494	1	-0.907	---	---	100
1480	tolazoline - HL60	0.52	1	0.907	---	---	100
1481	wortmannin - ssMCF7	-0.493	1	-0.907	---	---	100
1482	dorzolamide - HL60	0.519	1	0.906	---	---	100
1483	sulfachlorpyridazine - HL60	-0.492	1	-0.906	---	---	100
1484	proxyphylline - PC3	-0.492	1	-0.906	---	---	100
1485	spectinomycin - PC3	0.519	1	0.906	---	---	100
1486	bromperidol - HL60	0.518	1	0.905	---	---	100
1487	methapyrilene - PC3	0.518	1	0.905	---	---	100
1488	kanamycin - HL60	0.518	1	0.904	---	---	100
1489	lovastatin - HL60	-0.489	1	-0.904	---	---	100
1490	amiloride - HL60	0.517	1	0.904	---	---	100
1491	phenoxybenzamine - PC3	-0.488	1	-0.904	---	---	100
1492	imipenem - PC3	-0.488	1	-0.904	---	---	100
1493	chlormezanone - PC3	0.517	1	0.904	---	---	100
1494	streptozocin - PC3	0.517	1	0.903	---	---	100
1495	iopamidol - HL60	0.516	1	0.903	---	---	100
1496	pancuronium bromide - PC3	0.515	1	0.902	---	---	100
1497	paromomycin - PC3	0.515	1	0.902	---	---	100
1498	hesperidin - PC3	-0.486	1	-0.902	---	---	100
1499	acetohexamide - PC3	-0.485	1	-0.902	---	---	100
1500	cefoperazone - PC3	0.513	1	0.901	---	---	100
1501	delsoline - HL60	-0.484	1	-0.901	---	---	100
1502	theobromine - PC3	0.513	1	0.901	---	---	100
1503	beta-escin - HL60	0.513	1	0.901	---	---	100
1504	(-)-catechin - MCF7	-0.482	1	-0.9	---	---	100
1505	dydrogesterone - HL60	0.513	1	0.9	---	---	100
1506	artemisinin - MCF7	-0.482	1	-0.9	---	---	100
1507	bumetanide - HL60	0.512	1	0.899	---	---	100
1508	ketoconazole - HL60	0.512	1	0.899	---	---	100
1509	glimepiride - HL60	0.512	1	0.899	---	---	100
1510	propantheline bromide - PC3	-0.48	1	-0.899	---	---	100
1511	lycorine - PC3	0.511	1	0.899	---	---	100
1512	clebopride - PC3	0.511	1	0.898	---	---	100
1513	TTNPB - PC3	0.51	1	0.898	---	---	100
1514	benzbromarone - PC3	-0.479	1	-0.898	---	---	100
1515	nitrofural - PC3	0.509	1	0.897	---	---	100
1516	STOCK1N-28457 - PC3	-0.478	1	-0.897	---	---	100
1517	yohimbic acid - PC3	0.509	1	0.897	---	---	100
1518	roxithromycin - PC3	-0.477	1	-0.897	---	---	100
1519	zidovudine - PC3	0.508	1	0.897	---	---	100
1520	coralyne - PC3	-0.476	1	-0.897	---	---	100
1521	buflomedil - PC3	-0.476	1	-0.896	---	---	100
1522	alfuzosin - PC3	-0.476	1	-0.896	---	---	100
1523	esculin - PC3	0.507	1	0.896	---	---	100
1524	pilocarpine - HL60	-0.474	1	-0.895	---	---	100
1525	azlocillin - PC3	-0.474	1	-0.895	---	---	100
1526	metyrapone - PC3	-0.474	1	-0.895	---	---	100
1527	monocrotaline - PC3	-0.472	1	-0.894	---	---	100
1528	asiaticoside - PC3	0.502	1	0.894	---	---	100
1529	hecogenin - HL60	-0.47	1	-0.893	---	---	100
1530	orciprenaline - PC3	0.501	1	0.893	---	---	100
1531	milrinone - PC3	-0.47	1	-0.892	---	---	100
1532	moracizine - PC3	-0.47	1	-0.892	---	---	100
1533	nadolol - PC3	0.5	1	0.892	---	---	100
1534	decitabine - MCF7	-0.469	1	-0.892	---	---	100
1535	amodiaquine - HL60	-0.468	1	-0.892	---	---	100
1536	laudanosine - PC3	0.499	1	0.891	---	---	100
1537	loracarbef - PC3	-0.468	1	-0.891	---	---	100
1538	flumequine - PC3	-0.467	1	-0.891	---	---	100
1539	suprofen - PC3	0.498	1	0.891	---	---	100
1540	repaglinide - PC3	-0.466	1	-0.891	---	---	100
1541	quipazine - HL60	0.497	1	0.89	---	---	100
1542	cicloheximide - PC3	0.496	1	0.89	---	---	100
1543	gramine - PC3	0.496	1	0.89	---	---	100
1544	niridazole - HL60	-0.464	1	-0.89	---	---	100
1545	carteolol - PC3	0.496	1	0.89	---	---	100
1546	trimipramine - PC3	-0.463	1	-0.89	---	---	100
1547	cromoglicic acid - MCF7	0.496	1	0.889	---	---	100
1548	pyridoxine - PC3	-0.462	1	-0.889	---	---	100
1549	fusidic acid - PC3	-0.462	1	-0.889	---	---	100
1550	sulfaquinoxaline - HL60	0.494	1	0.888	---	---	100
1551	lysergol - PC3	-0.46	1	-0.888	---	---	100
1552	aconitine - HL60	0.494	1	0.888	---	---	100
1553	ergocalciferol - PC3	-0.46	1	-0.888	---	---	100
1554	BW-B70C - MCF7	0.494	1	0.888	---	---	100
1555	molsidomine - PC3	-0.46	1	-0.888	---	---	100
1556	chloroquine - HL60	0.494	1	0.888	---	---	100
1557	trihexyphenidyl - MCF7	0.493	1	0.887	---	---	100
1558	5151277 - MCF7	0.493	1	0.887	---	---	100
1559	vincamine - HL60	0.492	1	0.887	---	---	100
1560	parthenolide - PC3	-0.458	1	-0.886	---	---	100
1561	iopromide - PC3	0.491	1	0.886	---	---	100
1562	succinylsulfathiazole - PC3	-0.457	1	-0.886	---	---	100
1563	iobenguane - HL60	0.49	1	0.886	---	---	100
1564	isocorydine - PC3	0.49	1	0.886	---	---	100
1565	butamben - PC3	-0.456	1	-0.885	---	---	100
1566	atropine methonitrate - MCF7	-0.455	1	-0.885	---	---	100
1567	mifepristone - PC3	-0.454	1	-0.884	---	---	100
1568	convolamine - PC3	-0.454	1	-0.884	---	---	100
1569	colistin - PC3	0.487	1	0.884	---	---	100
1570	gliquidone - PC3	-0.454	1	-0.884	---	---	100
1571	yohimbine - PC3	-0.453	1	-0.884	---	---	100
1572	cefalexin - PC3	-0.451	1	-0.883	---	---	100
1573	tomatidine - PC3	0.485	1	0.883	---	---	100
1574	phenanthridinone - MCF7	-0.451	1	-0.883	---	---	100
1575	sulfinpyrazone - PC3	-0.45	1	-0.882	---	---	100
1576	nimodipine - PC3	0.485	1	0.882	---	---	100
1577	isotretinoin - HL60	0.484	1	0.882	---	---	100
1578	clobetasol - PC3	-0.447	1	-0.881	---	---	100
1579	mecamylamine - PC3	0.483	1	0.881	---	---	100
1580	seneciphylline - PC3	0.483	1	0.881	---	---	100
1581	azapropazone - HL60	0.482	1	0.88	---	---	100
1582	methylergometrine - PC3	-0.445	1	-0.88	---	---	100
1583	aminocaproic acid - PC3	-0.444	1	-0.88	---	---	100
1584	dinoprost - HL60	0.482	1	0.88	---	---	100
1585	thiethylperazine - PC3	0.48	1	0.879	---	---	100
1586	troleandomycin - MCF7	-0.443	1	-0.879	---	---	100
1587	raubasine - HL60	0.48	1	0.879	---	---	100
1588	fluorometholone - PC3	-0.442	1	-0.879	---	---	100
1589	piroxicam - HL60	0.48	1	0.879	---	---	100
1590	digitoxigenin - PC3	-0.442	1	-0.879	---	---	100
1591	simvastatin - HL60	-0.442	1	-0.878	---	---	100
1592	hexestrol - PC3	-0.441	1	-0.878	---	---	100
1593	chloropyrazine - HL60	0.477	1	0.877	---	---	100
1594	LY-294002 - ssMCF7	-0.439	1	-0.877	---	---	100
1595	chloropyramine - PC3	0.476	1	0.877	---	---	100
1596	sodium phenylbutyrate - PC3	-0.438	1	-0.877	---	---	100
1597	theophylline - HL60	0.476	1	0.877	---	---	100
1598	iopamidol - PC3	0.474	1	0.876	---	---	100
1599	lincomycin - HL60	0.474	1	0.876	---	---	100
1600	tenoxicam - PC3	0.473	1	0.876	---	---	100
1601	amodiaquine - PC3	-0.437	1	-0.875	---	---	100
1602	benperidol - HL60	0.473	1	0.875	---	---	100
1603	AG-012559 - MCF7	-0.436	1	-0.875	---	---	100
1604	trimetazidine - PC3	-0.436	1	-0.875	---	---	100
1605	probucol - PC3	0.471	1	0.874	---	---	100
1606	canadine - PC3	-0.434	1	-0.874	---	---	100
1607	furosemide - HL60	0.471	1	0.874	---	---	100
1608	isoetarine - PC3	-0.434	1	-0.874	---	---	100
1609	hemicholinium - HL60	0.47	1	0.873	---	---	100
1610	enoxacin - PC3	-0.432	1	-0.872	---	---	100
1611	florfenicol - PC3	0.469	1	0.872	---	---	100
1612	3-hydroxy-DL-kynurenine - PC3	0.468	1	0.872	---	---	100
1613	eticlopride - PC3	0.468	1	0.872	---	---	100
1614	Prestwick-682 - PC3	-0.43	1	-0.871	---	---	100
1615	Prestwick-864 - PC3	0.468	1	0.871	---	---	100
1616	methylprednisolone - PC3	0.467	1	0.871	---	---	100
1617	amantadine - PC3	-0.428	1	-0.871	---	---	100
1618	Prestwick-967 - PC3	0.466	1	0.87	---	---	100
1619	altizide - PC3	0.465	1	0.869	---	---	100
1620	vinblastine - PC3	0.464	1	0.869	---	---	100
1621	cefotetan - MCF7	-0.424	1	-0.869	---	---	100
1622	nifuroxazide - PC3	-0.424	1	-0.868	---	---	100
1623	desipramine - PC3	0.464	1	0.868	---	---	100
1624	saquinavir - PC3	-0.424	1	-0.868	---	---	100
1625	drofenine - PC3	-0.423	1	-0.867	---	---	100
1626	quinisocaine - PC3	0.462	1	0.867	---	---	100
1627	tonzonium bromide - HL60	-0.423	1	-0.867	---	---	100
1628	bephenium hydroxynaphthoate - PC3	-0.422	1	-0.867	---	---	100
1629	harmaline - PC3	0.461	1	0.866	---	---	100
1630	propofol - PC3	-0.421	1	-0.866	---	---	100
1631	mesoridazine - PC3	0.459	1	0.865	---	---	100
1632	ritodrine - PC3	-0.42	1	-0.865	---	---	100
1633	salsolidin - PC3	0.458	1	0.865	---	---	100
1634	cefepime - HL60	0.457	1	0.864	---	---	100
1635	nimesulide - PC3	-0.416	1	-0.864	---	---	100
1636	sulfaphenazole - PC3	-0.416	1	-0.863	---	---	100
1637	quipazine - PC3	-0.416	1	-0.863	---	---	100
1638	mepyramine - PC3	0.455	1	0.863	---	---	100
1639	ethaverine - PC3	-0.414	1	-0.863	---	---	100
1640	ricinine - PC3	0.455	1	0.863	---	---	100
1641	foliosidine - HL60	-0.414	1	-0.862	---	---	100
1642	etanidazole - PC3	-0.413	1	-0.862	---	---	100
1643	iohexol - PC3	0.454	1	0.862	---	---	100
1644	naftidrofuryl - PC3	-0.413	1	-0.862	---	---	100
1645	cytisine - PC3	0.453	1	0.861	---	---	100
1646	fluvastatin - PC3	-0.413	1	-0.861	---	---	100
1647	isoflupredone - MCF7	0.452	1	0.861	---	---	100
1648	CP-645525-01 - PC3	-0.412	1	-0.86	---	---	100
1649	practolol - PC3	-0.412	1	-0.86	---	---	100
1650	caffeic acid - PC3	-0.412	1	-0.86	---	---	100
1651	noretynodrel - PC3	-0.412	1	-0.86	---	---	100
1652	fipexide - PC3	-0.411	1	-0.859	---	---	100
1653	biperiden - PC3	0.45	1	0.859	---	---	100
1654	quercetin - HL60	0.449	1	0.859	---	---	100
1655	betulinic acid - PC3	-0.409	1	-0.858	---	---	100
1656	mebeverine - PC3	0.447	1	0.857	---	---	100
1657	cinnarizine - PC3	0.447	1	0.857	---	---	100
1658	tetraethylenepentamine - PC3	0.447	1	0.857	---	---	100
1659	brinzolamide - PC3	-0.404	1	-0.856	---	---	100
1660	mesalazine - PC3	0.446	1	0.856	---	---	100
1661	cetirizine - PC3	-0.404	1	-0.856	---	---	100
1662	ethionamide - PC3	0.446	1	0.855	---	---	100
1663	skimmianine - PC3	-0.403	1	-0.855	---	---	100
1664	desoxycortone - PC3	-0.402	1	-0.854	---	---	100
1665	rofecoxib - PC3	-0.401	1	-0.854	---	---	100
1666	estriol - PC3	-0.399	1	-0.853	---	---	100
1667	doxycycline - PC3	0.441	1	0.853	---	---	100
1668	ronidazole - MCF7	-0.399	1	-0.853	---	---	100
1669	flucloxacillin - PC3	0.44	1	0.852	---	---	100
1670	carbenoxolone - PC3	-0.397	1	-0.852	---	---	100
1671	testosterone - PC3	0.437	1	0.85	---	---	100
1672	diperodon - MCF7	-0.392	1	-0.85	---	---	100
1673	prasterone - PC3	-0.391	1	-0.849	---	---	100
1674	10-methoxyharmalan - PC3	-0.389	1	-0.849	---	---	100
1675	apramycin - PC3	-0.389	1	-0.848	---	---	100
1676	dexibuprofen - PC3	-0.388	1	-0.848	---	---	100
1677	danazol - HL60	0.434	1	0.848	---	---	100
1678	napelline - PC3	0.434	1	0.848	---	---	100
1679	palmatine - PC3	-0.388	1	-0.847	---	---	100
1680	omeprazole - PC3	-0.388	1	-0.847	---	---	100
1681	Prestwick-983 - HL60	0.433	1	0.847	---	---	100
1682	tolazamide - MCF7	0.433	1	0.847	---	---	100
1683	methoxsalen - PC3	-0.386	1	-0.846	---	---	100
1684	oxytetracycline - PC3	-0.385	1	-0.845	---	---	100
1685	nifurtimox - PC3	0.431	1	0.845	---	---	100
1686	etilefrine - PC3	0.43	1	0.844	---	---	100
1687	salsolinol - PC3	-0.381	1	-0.844	---	---	100
1688	Prestwick-972 - MCF7	-0.381	1	-0.844	---	---	100
1689	boldine - PC3	-0.381	1	-0.843	---	---	100
1690	sulfadoxine - PC3	0.428	1	0.842	---	---	100
1691	propylthiouracil - PC3	0.428	1	0.842	---	---	100
1692	cinchonidine - PC3	0.427	1	0.842	---	---	100
1693	co-dergocrine mesilate - PC3	0.427	1	0.841	---	---	100
1694	bupropion - PC3	-0.375	1	-0.841	---	---	100
1695	etynodiol - HL60	-0.374	1	-0.841	---	---	100
1696	iopromide - HL60	-0.373	1	-0.84	---	---	100
1697	oxyphenbutazone - PC3	0.425	1	0.84	---	---	100
1698	6-benzylaminopurine - PC3	0.424	1	0.839	---	---	100
1699	biotin - MCF7	-0.373	1	-0.839	---	---	100
1700	mimosine - PC3	0.423	1	0.839	---	---	100
1701	piperacetazine - PC3	-0.37	1	-0.838	---	---	100
1702	fursultiamine - PC3	-0.369	1	-0.838	---	---	100
1703	sulfamerazine - PC3	-0.369	1	-0.838	---	---	100
1704	cefoxitin - PC3	-0.369	1	-0.838	---	---	100
1705	U0125 - PC3	-0.368	1	-0.837	---	---	100
1706	ribavirin - PC3	0.419	1	0.836	---	---	100
1707	hycanthone - PC3	-0.365	1	-0.836	---	---	100
1708	cyclizine - PC3	0.416	1	0.836	---	---	100
1709	cefadroxil - PC3	-0.363	1	-0.835	---	---	100
1710	diclofenamide - HL60	0.416	1	0.835	---	---	100
1711	fluspirilene - PC3	-0.362	1	-0.835	---	---	100
1712	terazosin - PC3	0.415	1	0.835	---	---	100
1713	chlortetracycline - HL60	-0.358	1	-0.832	---	---	100
1714	nafcillin - PC3	0.411	1	0.832	---	---	100
1715	oxantel - PC3	-0.357	1	-0.832	---	---	100
1716	equilin - PC3	-0.357	1	-0.832	---	---	100
1717	progesterone - PC3	0.411	1	0.832	---	---	100
1718	meclocycline - PC3	-0.355	1	-0.831	---	---	100
1719	meclozine - PC3	-0.355	1	-0.831	---	---	100
1720	fluorocurarine - PC3	0.409	1	0.83	---	---	100
1721	N-acetylmuramic acid - PC3	-0.35	1	-0.829	---	---	100
1722	dyclonine - PC3	0.408	1	0.829	---	---	100
1723	fluphenazine - SKMEL5	-0.348	1	-0.828	---	---	100
1724	atropine methonitrate - PC3	-0.347	1	-0.828	---	---	100
1725	bezafibrate - PC3	-0.345	1	-0.827	---	---	100
1726	exemestane - MCF7	-0.345	1	-0.827	---	---	100
1727	hydroquinine - HL60	0.405	1	0.827	---	---	100
1728	sulindac sulfide - MCF7	-0.342	1	-0.827	---	---	100
1729	vigabatrin - PC3	0.405	1	0.827	---	---	100
1730	digoxin - PC3	0.405	1	0.827	---	---	100
1731	cefazolin - HL60	0.404	1	0.826	---	---	100
1732	clorsulon - HL60	0.403	1	0.825	---	---	100
1733	2-deoxy-D-glucose - MCF7	0.402	1	0.825	---	---	100
1734	guanethidine - PC3	0.402	1	0.824	---	---	100
1735	sulfametoxydiazine - PC3	-0.338	1	-0.824	---	---	100
1736	5140203 - MCF7	-0.338	1	-0.824	---	---	100
1737	oxybenzone - PC3	0.401	1	0.824	---	---	100
1738	raloxifene - PC3	-0.334	1	-0.824	---	---	100
1739	5286656 - MCF7	-0.334	1	-0.823	---	---	100
1740	HNMPA-(AM)3 - PC3	-0.332	1	-0.823	---	---	100
1741	hymecromone - PC3	0.399	1	0.823	---	---	100
1742	naringenin - PC3	0.398	1	0.821	---	---	100
1743	lidoflazine - PC3	0.397	1	0.821	---	---	100
1744	bambuterol - PC3	-0.323	1	-0.821	---	---	100
1745	delsoline - PC3	0.397	1	0.821	---	---	100
1746	dimethadione - PC3	-0.32	1	-0.821	---	---	100
1747	nisoxetine - PC3	0.395	1	0.82	---	---	100
1748	N-phenylanthranilic acid - MCF7	-0.315	1	-0.819	---	---	100
1749	alpha-estradiol - ssMCF7	0.392	1	0.818	---	---	100
1750	imatinib - MCF7	-0.313	1	-0.818	---	---	100
1751	flunarizine - PC3	0.392	1	0.818	---	---	100
1752	AR-A014418 - MCF7	-0.312	1	-0.818	---	---	100
1753	propranolol - PC3	-0.307	1	-0.817	---	---	100
1754	pentamidine - PC3	0.388	1	0.817	---	---	100
1755	tamoxifen - ssMCF7	-0.304	1	-0.817	---	---	100
1756	5162773 - MCF7	0.386	1	0.816	---	---	100
1757	xylazine - PC3	-0.299	1	-0.816	---	---	100
1758	Prestwick-984 - PC3	-0.299	1	-0.815	---	---	100
1759	dioxybenzone - PC3	0.385	1	0.815	---	---	100
1760	methacholine chloride - PC3	-0.293	1	-0.814	---	---	100
1761	harmalol - PC3	0.384	1	0.814	---	---	100
1762	propidium iodide - PC3	-0.293	1	-0.814	---	---	100
1763	tiletamine - PC3	0.382	1	0.812	---	---	100
1764	levothyroxine sodium - PC3	0.382	1	0.812	---	---	100
1765	vitexin - PC3	0.381	1	0.812	---	---	100
1766	carisoprodol - PC3	-0.277	1	-0.811	---	---	100
1767	etynodiol - PC3	0.38	1	0.81	---	---	100
1768	fulvestrant - ssMCF7	-0.266	1	-0.81	---	---	100
1769	phensuximide - PC3	0.379	1	0.81	---	---	100
1770	(-)-atenolol - PC3	-0.266	1	-0.81	---	---	100
1771	valdecoxib - MCF7	-0.265	1	-0.809	---	---	100
1772	butein - PC3	-0.257	1	-0.809	---	---	100
1773	benzthiazide - PC3	-0.252	1	-0.809	---	---	100
1774	penbutolol - HL60	0	1	-0.808	---	---	0
1775	buspirone - PC3	0.376	1	0.808	---	---	100
1776	lansoprazole - HL60	0	1	-0.808	---	---	0
1777	Prestwick-1103 - HL60	0	1	-0.808	---	---	0
1778	simvastatin - PC3	0.376	1	0.808	---	---	100
1779	betulin - HL60	0	1	-0.807	---	---	0
1780	isoflupredone - HL60	0	1	-0.807	---	---	0
1781	netilmicin - HL60	0	1	-0.807	---	---	0
1782	iodixanol - HL60	0	1	-0.806	---	---	0
1783	PF-00539745-00 - MCF7	0.373	1	0.806	---	---	100
1784	methylbenzethonium chloride - HL60	0	1	-0.806	---	---	0
1785	streptozocin - HL60	0	1	-0.806	---	---	0
1786	pivmecillinam - HL60	0	1	-0.806	---	---	0
1787	isoxicam - HL60	0	1	-0.805	---	---	0
1788	fludrocortisone - HL60	0	1	-0.805	---	---	0
1789	alexidine - HL60	0	1	-0.805	---	---	0
1790	acetohexamide - HL60	0	1	-0.805	---	---	0
1791	antazoline - PC3	0.37	1	0.805	---	---	100
1792	loracarbef - HL60	0	1	-0.805	---	---	0
1793	yohimbic acid - HL60	0	1	-0.804	---	---	0
1794	halofantrine - HL60	0	1	-0.804	---	---	0
1795	benzethonium chloride - HL60	0	1	-0.804	---	---	0
1796	hexetidine - HL60	0	1	-0.804	---	---	0
1797	thapsigargin - PC3	0	1	-0.804	---	---	0
1798	suprofen - HL60	0	1	-0.803	---	---	0
1799	viomycin - HL60	0	1	-0.803	---	---	0
1800	diethylstilbestrol - HL60	0	1	-0.803	---	---	0
1801	chlorcyclizine - HL60	0	1	-0.803	---	---	0
1802	adiphenine - HL60	0	1	-0.803	---	---	0
1803	etacrynic acid - MCF7	0.367	1	0.802	---	---	100
1804	tenoxicam - HL60	0	1	-0.802	---	---	0
1805	ozagrel - HL60	0	1	-0.802	---	---	0
1806	rilmenidine - HL60	0	1	-0.802	---	---	0
1807	guanabenz - HL60	0	1	-0.802	---	---	0
1808	Prestwick-682 - HL60	0	1	-0.801	---	---	0
1809	diphenhydramine - HL60	0	1	-0.801	---	---	0
1810	benzylpenicillin - PC3	0.362	1	0.801	---	---	100
1811	pizotifen - HL60	0	1	-0.801	---	---	0
1812	reserpine - PC3	0.362	1	0.801	---	---	100
1813	isradipine - PC3	0	1	-0.8	---	---	0
1814	chloropyrazine - PC3	0.362	1	0.8	---	---	100
1815	methanthelinium bromide - HL60	0	1	-0.8	---	---	0
1816	cephaeline - HL60	0	1	-0.8	---	---	0
1817	trihexyphenidyl - HL60	0	1	-0.799	---	---	0
1818	levopropoxyphene - HL60	0	1	-0.799	---	---	0
1819	benzamil - HL60	0	1	-0.799	---	---	0
1820	etoposide - PC3	0	1	-0.799	---	---	0
1821	tranexamic acid - HL60	0	1	-0.799	---	---	0
1822	fluoxetine - HL60	0	1	-0.798	---	---	0
1823	tiletamine - HL60	0	1	-0.798	---	---	0
1824	triflupromazine - HL60	0	1	-0.798	---	---	0
1825	mepyramine - HL60	0	1	-0.798	---	---	0
1826	sertaconazole - HL60	0	1	-0.797	---	---	0
1827	guanadrel - HL60	0	1	-0.797	---	---	0
1828	cefalonium - MCF7	0	1	-0.797	---	---	0
1829	nizatidine - HL60	0	1	-0.797	---	---	0
1830	hydroxyachillin - HL60	0	1	-0.796	---	---	0
1831	phensuximide - HL60	0	1	-0.796	---	---	0
1832	tetrandrine - PC3	0.354	1	0.796	---	---	100
1833	gelsemine - HL60	0	1	-0.796	---	---	0
1834	harpagoside - PC3	0.354	1	0.796	---	---	100
1835	primidone - HL60	0	1	-0.796	---	---	0
1836	megestrol - PC3	0.354	1	0.796	---	---	100
1837	benzocaine - HL60	0	1	-0.795	---	---	0
1838	furazolidone - PC3	0	1	-0.795	---	---	0
1839	metoprolol - PC3	0.352	1	0.795	---	---	100
1840	15-delta prostaglandin J2 - PC3	0	3	-0.795	---	---	0
1841	(+)-isoprenaline - PC3	0.351	1	0.795	---	---	100
1842	tolmetin - HL60	0	1	-0.795	---	---	0
1843	moracizine - HL60	0	1	-0.795	---	---	0
1844	rifampicin - HL60	0	1	-0.794	---	---	0
1845	1,5-isoquinolinediol - HL60	0	1	-0.794	---	---	0
1846	nadide - HL60	0	1	-0.794	---	---	0
1847	cicloheximide - HL60	0	1	-0.793	---	---	0
1848	trimethobenzamide - HL60	0	1	-0.793	---	---	0
1849	felbinac - HL60	0	1	-0.793	---	---	0
1850	nilutamide - HL60	0	1	-0.792	---	---	0
1851	riluzole - HL60	0	1	-0.792	---	---	0
1852	ursodeoxycholic acid - PC3	0.344	1	0.792	---	---	100
1853	ribavirin - HL60	0	1	-0.792	---	---	0
1854	tacrine - PC3	0.343	1	0.792	---	---	100
1855	eticlopride - HL60	0	1	-0.791	---	---	0
1856	atractyloside - HL60	0	1	-0.791	---	---	0
1857	cyclic adenosine monophosphate - HL60	0	1	-0.791	---	---	0
1858	cefixime - HL60	0	1	-0.791	---	---	0
1859	glycocholic acid - HL60	0	1	-0.79	---	---	0
1860	pirinixic acid - SKMEL5	0.341	1	0.79	---	---	100
1861	dl-alpha tocopherol - HL60	0	1	-0.79	---	---	0
1862	heptaminol - HL60	0	1	-0.79	---	---	0
1863	abamectin - HL60	0	1	-0.79	---	---	0
1864	STOCK1N-35696 - MCF7	0.338	1	0.789	---	---	100
1865	canadine - HL60	0	1	-0.789	---	---	0
1866	dehydrocholic acid - HL60	0	1	-0.789	---	---	0
1867	gabexate - HL60	0	1	-0.789	---	---	0
1868	megestrol - HL60	0	1	-0.789	---	---	0
1869	moroxydine - HL60	0	1	-0.788	---	---	0
1870	procyclidine - HL60	0	1	-0.788	---	---	0
1871	cromoglicic acid - PC3	0	1	-0.788	---	---	0
1872	altretamine - PC3	0.335	1	0.788	---	---	100
1873	mafenide - HL60	0	1	-0.788	---	---	0
1874	puromycin - PC3	0	1	-0.788	---	---	0
1875	carbenoxolone - HL60	0	1	-0.788	---	---	0
1876	pirenperone - PC3	0.334	1	0.788	---	---	100
1877	5666823 - MCF7	0.334	1	0.787	---	---	100
1878	dexibuprofen - HL60	0	1	-0.787	---	---	0
1879	Prestwick-857 - HL60	0	1	-0.787	---	---	0
1880	pregnenolone - HL60	0	1	-0.787	---	---	0
1881	ceforanide - HL60	0	1	-0.787	---	---	0
1882	phenylpropanolamine - PC3	0.332	1	0.787	---	---	100
1883	pheneticillin - HL60	0	1	-0.786	---	---	0
1884	metanephrine - HL60	0	1	-0.786	---	---	0
1885	amrinone - PC3	0.331	1	0.786	---	---	100
1886	mepenzolate bromide - HL60	0	1	-0.786	---	---	0
1887	copper sulfate - ssMCF7	0.33	1	0.785	---	---	100
1888	diphemanil metilsulfate - HL60	0	1	-0.785	---	---	0
1889	mefenamic acid - HL60	0	1	-0.785	---	---	0
1890	(+)-chelidonine - HL60	0	1	-0.785	---	---	0
1891	metformin - HL60	0	1	-0.785	---	---	0
1892	ondansetron - HL60	0	1	-0.784	---	---	0
1893	lomefloxacin - HL60	0	1	-0.784	---	---	0
1894	mebhydrolin - HL60	0	1	-0.784	---	---	0
1895	valproic acid - ssMCF7	0.325	1	0.784	---	---	100
1896	merbromin - HL60	0	1	-0.783	---	---	0
1897	mestranol - PC3	0.324	1	0.783	---	---	100
1898	thiamazole - HL60	0	1	-0.783	---	---	0
1899	estrone - HL60	0	1	-0.783	---	---	0
1900	emetine - PC3	0	1	-0.782	---	---	0
1901	amitriptyline - HL60	0	1	-0.782	---	---	0
1902	Prestwick-1085 - PC3	0.319	1	0.782	---	---	100
1903	carisoprodol - HL60	0	1	-0.782	---	---	0
1904	enilconazole - PC3	0.316	1	0.782	---	---	100
1905	ramifenazone - HL60	0	1	-0.782	---	---	0
1906	chenodeoxycholic acid - HL60	0	1	-0.782	---	---	0
1907	hexylcaine - HL60	0	1	-0.781	---	---	0
1908	calcium folinate - HL60	0	1	-0.781	---	---	0
1909	debrisoquine - PC3	0.314	1	0.781	---	---	100
1910	aciclovir - HL60	0	1	-0.781	---	---	0
1911	sulfamethizole - PC3	0.312	1	0.781	---	---	100
1912	hymecromone - HL60	0	1	-0.781	---	---	0
1913	sitosterol - PC3	0.311	1	0.781	---	---	100
1914	Chicago Sky Blue 6B - HL60	0	1	-0.78	---	---	0
1915	ioversol - PC3	0.311	1	0.78	---	---	100
1916	vitexin - HL60	0	1	-0.78	---	---	0
1917	dapsone - HL60	0	1	-0.78	---	---	0
1918	pilocarpine - PC3	0.311	1	0.78	---	---	100
1919	boldine - HL60	0	1	-0.78	---	---	0
1920	PNU-0293363 - MCF7	0.31	1	0.78	---	---	100
1921	sulfabenzamide - HL60	0	1	-0.78	---	---	0
1922	iocetamic acid - HL60	0	1	-0.779	---	---	0
1923	homochlorcyclizine - HL60	0	1	-0.779	---	---	0
1924	etidronic acid - HL60	0	1	-0.779	---	---	0
1925	butein - MCF7	0.308	1	0.779	---	---	100
1926	zaprinast - HL60	0	1	-0.778	---	---	0
1927	monensin - HL60	0	1	-0.778	---	---	0
1928	Prestwick-984 - HL60	0	1	-0.778	---	---	0
1929	idazoxan - HL60	0	1	-0.778	---	---	0
1930	dicycloverine - HL60	0	1	-0.778	---	---	0
1931	glibenclamide - HL60	0.305	1	0.778	---	---	100
1932	lithocholic acid - HL60	0	1	-0.778	---	---	0
1933	homatropine - HL60	0	1	-0.777	---	---	0
1934	carbachol - PC3	0.304	1	0.777	---	---	100
1935	cyclobenzaprine - HL60	0	1	-0.777	---	---	0
1936	ethisterone - HL60	0	1	-0.777	---	---	0
1937	piromidic acid - PC3	0.301	1	0.777	---	---	100
1938	cefadroxil - HL60	0	1	-0.777	---	---	0
1939	oxybenzone - HL60	0	1	-0.777	---	---	0
1940	2-aminobenzenesulfonamide - HL60	0	1	-0.776	---	---	0
1941	lactobionic acid - PC3	0.298	1	0.776	---	---	100
1942	gabapentin - HL60	0	1	-0.776	---	---	0
1943	asiaticoside - HL60	0	1	-0.776	---	---	0
1944	cefsulodin - HL60	0	1	-0.775	---	---	0
1945	finasteride - HL60	0	1	-0.775	---	---	0
1946	amphotericin B - HL60	0	1	-0.775	---	---	0
1947	isosorbide - HL60	0	1	-0.775	---	---	0
1948	ciprofibrate - HL60	0	1	-0.774	---	---	0
1949	betulinic acid - HL60	0	1	-0.774	---	---	0
1950	naproxen - HL60	0	2	-0.774	---	---	0
1951	alpha-ergocryptine - HL60	0	1	-0.773	---	---	0
1952	harman - HL60	0	1	-0.773	---	---	0
1953	trapidil - HL60	0	1	-0.773	---	---	0
1954	STOCK1N-35696 - PC3	0	1	-0.772	---	---	0
1955	rolitetracycline - PC3	0.279	1	0.772	---	---	100
1956	iproniazid - HL60	0	1	-0.772	---	---	0
1957	carbarsone - HL60	0	1	-0.771	---	---	0
1958	sulfasalazine - PC3	0	1	-0.771	---	---	0
1959	dipivefrine - HL60	0	1	-0.771	---	---	0
1960	quinidine - PC3	0	1	-0.771	---	---	0
1961	calcium pantothenate - PC3	0.268	1	0.77	---	---	100
1962	lisuride - HL60	0	1	-0.77	---	---	0
1963	gramine - HL60	0	1	-0.77	---	---	0
1964	parthenolide - HL60	0	1	-0.77	---	---	0
1965	pheniramine - HL60	0	1	-0.77	---	---	0
1966	piroxicam - PC3	0	1	-0.77	---	---	0
1967	3-acetylcoumarin - PC3	0	1	-0.769	---	---	0
1968	ticarcillin - PC3	0.261	1	0.769	---	---	100
1969	alfadolone - MCF7	0.258	1	0.769	---	---	100
1970	midodrine - HL60	0	1	-0.769	---	---	0
1971	SC-58125 - HL60	0	1	-0.768	---	---	0
1972	etamivan - HL60	0	1	-0.768	---	---	0
1973	Prestwick-675 - HL60	0	1	-0.768	---	---	0
1974	saquinavir - HL60	0	1	-0.768	---	---	0
1975	cefotiam - PC3	0.23	1	0.768	---	---	100
1976	cytisine - HL60	0	1	-0.767	---	---	0
1977	topiramate - MCF7	0	1	-0.767	---	---	0
1978	nalidixic acid - HL60	0	1	-0.767	---	---	0
1979	trimipramine - HL60	0	1	-0.767	---	---	0
1980	methotrexate - HL60	0	2	-0.767	---	---	0
1981	clemastine - HL60	0	1	-0.767	---	---	0
1982	monobenzone - PC3	0.203	1	0.767	---	---	100
1983	(-)-MK-801 - PC3	0	1	-0.766	---	---	0
1984	MS-275 - PC3	0	2	0.766	---	---	0
1985	menadione - HL60	0	1	0.766	---	---	0
1986	clotrimazole - HL60	0	1	-0.766	---	---	0
1987	syrosingopine - PC3	0	1	0.766	---	---	0
1988	norethisterone - HL60	0	1	0.766	---	---	0
1989	tetroquinone - HL60	0	1	-0.766	---	---	0
1990	triprolidine - HL60	0	1	0.766	---	---	0
1991	meptazinol - HL60	0	1	0.765	---	---	0
1992	pirenperone - HL60	0	1	-0.765	---	---	0
1993	mebendazole - HL60	0	1	0.765	---	---	0
1994	levonorgestrel - HL60	0	1	0.765	---	---	0
1995	probucol - HL60	0	1	0.765	---	---	0
1996	8-azaguanine - HL60	0	1	0.765	---	---	0
1997	Prestwick-692 - HL60	0	1	-0.765	---	---	0
1998	nitrendipine - HL60	0	1	0.765	---	---	0
1999	meclocycline - HL60	0	1	-0.764	---	---	0
[truncated: 1,588 more rows]

## Sheet: by atc code
rank	atc code	mean	n	enrichment	p	specificity	percent non-null
1	N07BB	0.355	10	0.594	0.00062	0.0234	80
2	M01AA	0.335	4	0.736	0.00941	0.0674	75
3	M01AG	-0.128	20	-0.336	0.01578	0.0055	50
4	V03AC	-0.271	8	-0.515	0.01729	0.0307	62
5	R03BX	-0.383	5	-0.627	0.01864	0.0243	80
6	R03DX	-0.383	5	-0.627	0.01864	0.0243	80
7	N05AE	0.425	4	0.691	0.01898	0.025	75
8	C01BD	-0.322	9	-0.474	0.02222	0.0109	55
9	N02BG	0.305	9	0.461	0.02846	0.0325	55
10	J05AF	0.239	8	0.481	0.03127	0.0063	62
11	J01XA	-0.218	4	-0.656	0.03203	0.1172	50
12	P01AC	-0.32	4	-0.653	0.03428	0.1	50
13	C05AX	0.33	4	0.637	0.04227	0.1005	75
14	C05CX	0.33	4	0.637	0.04227	0.1005	75
15	J05AE	-0.228	4	-0.625	0.04864	0.0227	50
16	N04BB	-0.321	4	-0.621	0.0517	0.183	75
17	R05CA	-0.274	10	-0.392	0.06774	0.3081	50
18	N07BA	-0.304	4	-0.591	0.0749	0.1235	75
19	A03AA	0.193	12	0.354	0.07519	0.0733	58
20	D06BB	0.283	15	0.318	0.07709	0.4866	53
21	C03BD	0.365	4	0.583	0.08045	0.0276	75
22	J01FF	0.288	8	0.422	0.0825	0.1057	62
23	G02AB	-0.321	4	-0.58	0.08494	0.1488	75
24	G03XA	0.208	4	0.578	0.08528	0.0364	50
25	P02CE	-0.374	4	-0.57	0.09545	0.2062	50
26	C03CC	-0.301	3	-0.634	0.10085	0.0898	66
27	A07XA	0.229	4	0.559	0.1037	0.0705	75
28	L02AB	0.308	4	0.54	0.12588	0.2364	75
29	C02CC	0.144	7	0.417	0.1286	0.0565	57
30	A05AA	0.278	7	0.416	0.1306	0.102	57
31	J01XX	0.268	4	0.536	0.13175	0.0694	50
32	G03DB	0.249	11	0.336	0.13181	0.1803	54
33	S01LA	-0.373	3	-0.606	0.13384	0.343	66
34	N07AX	0.18	4	0.53	0.13897	0.4025	75
35	M04AC	0.303	6	0.436	0.14695	0.2471	50
36	R03AB	0.243	4	0.511	0.16525	0.1454	50
37	R03CB	0.243	4	0.511	0.16525	0.1454	50
38	N01BX	0.247	8	0.369	0.17412	0.1773	50
39	J01DH	0.198	4	0.499	0.18439	0.2358	50
40	P01BE	-0.156	3	-0.567	0.19331	0.1928	66
41	L02AA	0.242	6	0.406	0.2073	0.6105	50
42	P02BA	0.163	8	0.353	0.21159	0.1679	50
43	N05BE	0.172	4	0.483	0.21242	0.1351	50
44	C02DC	0.076	5	0.438	0.22071	0.1333	60
45	C02DB	0.162	6	0.397	0.22721	0.2439	50
46	P01CC	0.236	8	0.345	0.23359	0.2213	50
47	C03DB	0.121	10	0.304	0.25396	0.2131	50
48	C08DB	-0.234	5	-0.412	0.2772	0.5469	60
49	N07AA	-0.246	4	-0.448	0.29611	0.3218	50
50	H03AA	0.215	8	0.318	0.3205	0.3309	50
51	P03AA	0.279	5	0.394	0.32765	0.6705	60
52	L01CA	0.293	3	0.501	0.32946	0.6022	66
53	D08AC	0.28	5	0.378	0.37383	0.486	60
54	R02AA	0.28	5	0.378	0.37383	0.486	60
55	A07AX	0.163	4	0.407	0.40745	0.5848	50
56	D08AF	0.256	4	0.397	0.43723	0.4444	50
57	J01XB	0.27	4	0.384	0.47998	0.7418	50
58	L01XB	0.308	3	0.44	0.48448	0.4947	66
59	A10BX	-0.224	4	-0.372	0.52583	0.7843	50
60	P01CX	0.014	4	-0.366	0.54921	0.6024	50
61	J01DE	0.143	4	0.364	0.54978	0.6452	50
62	M09AA	0.239	4	0.327	0.67793	0.7544	50
63	B03BB	0.114	4	0.292	0.79077	0.8921	50
64	N05CE	0.106	4	0.284	0.81476	0.9	50
65	A07EB	0.248	2	0.389	0.84479	0.8168	50
66	R03BC	0.248	2	0.389	0.84479	0.8168	50
67	N03AX	-0.219	5	-0.747	---	---	40
68	C01AB	0.136	3	0.641	---	---	33
69	P02CF	0.203	5	0.64	---	---	40
70	N04BA	-0.185	5	-0.621	---	---	40
71	A04AA	-0.099	4	-0.591	---	---	25
72	N05AX	0.114	3	0.573	---	---	33
73	G01AG	0.206	4	0.569	---	---	25
74	M03AA	0	2	-0.563	---	---	0
75	H03BB	-0.015	9	-0.535	---	---	11
76	L01BB	-0.181	3	-0.534	---	---	33
77	P02BX	-0.116	4	-0.531	---	---	25
78	N03AA	0	4	-0.52	---	---	0
79	V03AF	-0.087	5	-0.503	---	---	20
80	N01BA	-0.25	12	-0.501	---	---	41
81	P02CX	0.091	6	0.5	---	---	16
82	G04CB	-0.056	6	-0.498	---	---	33
83	L01AX	0.131	4	0.491	---	---	25
84	C08EX	0.057	7	0.484	---	---	14
85	A06AB	0	4	0.477	---	---	0
86	A06AG	0	4	0.477	---	---	0
87	C04AA	0.232	5	0.476	---	---	40
88	P02DA	0.179	5	0.468	---	---	40
89	C02BB	0.161	3	0.466	---	---	33
90	P01AX	-0.269	9	-0.462	---	---	44
91	C07AG	0.109	4	0.46	---	---	25
92	G01AD	0	4	-0.46	---	---	0
93	G03GB	0.18	4	0.458	---	---	25
94	N03AC	-0.063	4	-0.449	---	---	25
95	N02AF	0.209	5	0.447	---	---	40
96	B02BA	0	2	0.446	---	---	0
97	J01GA	0	4	-0.444	---	---	0
98	R01BA	0.083	4	0.444	---	---	25
99	R01AX	0	3	0.44	---	---	0
100	R03BB	0	3	0.44	---	---	0
101	R05CB	0.106	4	-0.435	---	---	0
102	V04CH	-0.177	4	-0.434	---	---	25
103	D07XC	0.23	7	0.433	---	---	42
104	J01DF	0.12	5	0.431	---	---	20
105	N05AF	0.051	12	0.43	---	---	25
106	G03DA	0.103	4	0.429	---	---	25
107	C02DG	-0.091	4	-0.427	---	---	25
108	N07CA	0.068	12	0.426	---	---	25
109	C08EA	0.054	7	0.423	---	---	14
110	D08AH	0.122	5	0.422	---	---	20
111	G01AC	0.122	5	0.422	---	---	20
112	P01AA	0.122	5	0.422	---	---	20
113	D06AA	-0.22	19	-0.413	---	---	42
114	C04AC	0	4	0.411	---	---	0
115	C10AD	0	4	0.411	---	---	0
116	C02KD	-0.128	4	-0.41	---	---	25
117	G02AD	-0.004	8	-0.41	---	---	12
118	L01DB	-0.1	10	0.399	---	---	0
119	R06AX	0.171	36	0.396	---	---	33
120	G03BA	-0.012	5	0.394	---	---	20
121	N02CX	0.198	8	0.388	---	---	37
122	R06AC	0.167	12	0.375	---	---	33
123	C04AD	0.2	5	0.371	---	---	40
124	A07DA	-0.129	6	-0.369	---	---	33
125	P02CA	0.032	16	0.369	---	---	12
126	S01XA	0.067	8	0.366	---	---	12
127	J05AX	0.167	5	0.365	---	---	40
128	M05BA	-0.154	4	-0.363	---	---	25
129	N05AC	0.066	24	0.362	---	---	16
130	A03AD	-0.157	4	-0.362	---	---	25
131	B02AA	0.002	8	-0.361	---	---	12
132	C01CE	-0.061	13	-0.361	---	---	15
133	N05CH	0.142	4	-0.361	---	---	0
134	N07AB	0.125	8	0.358	---	---	25
135	D06BX	-0.064	5	-0.358	---	---	40
136	N06AB	-0.142	21	-0.357	---	---	38
137	C01BG	-0.117	4	-0.355	---	---	25
138	C01CX	0.12	3	0.354	---	---	33
139	A03BA	-0.144	9	-0.353	---	---	44
140	G03CB	0.229	9	0.35	---	---	44
141	G04BX	-0.111	4	-0.35	---	---	25
142	M01AH	-0.112	14	-0.349	---	---	42
143	L02BG	0.169	5	0.348	---	---	40
144	G03XB	-0.114	4	-0.347	---	---	25
145	A16AX	0.11	7	0.345	---	---	42
146	C01AA	0.073	10	0.343	---	---	20
147	V04CA	-0.066	7	-0.342	---	---	28
148	G03XC	-0.116	7	-0.342	---	---	28
149	C10AX	0.142	10	0.341	---	---	30
150	C02AA	0.06	6	0.338	---	---	16
151	G02CC	-0.064	13	-0.337	---	---	30
152	J01EA	0.222	5	0.337	---	---	40
153	J04AC	0.106	5	-0.335	---	---	20
154	L01AA	-0.001	7	-0.334	---	---	14
155	C03DA	-0.076	5	-0.33	---	---	40
156	N04BD	0.042	4	-0.328	---	---	25
157	P01BC	-0.107	5	0.327	---	---	0
158	P01BD	0.211	5	0.327	---	---	40
159	V04CD	0.017	4	0.32	---	---	25
160	P01BB	0.19	3	0.32	---	---	33
161	L01CB	0	4	-0.32	---	---	0
162	N03AB	-0.085	10	-0.318	---	---	30
163	N06DA	0.175	8	0.314	---	---	37
164	A11DA	-0.072	8	-0.314	---	---	12
165	A14AA	0.098	4	0.311	---	---	25
166	J01MA	-0.17	25	-0.31	---	---	40
167	D06BA	-0.045	23	-0.31	---	---	21
168	J01XD	-0.155	16	-0.309	---	---	43
169	P01AB	-0.155	16	-0.309	---	---	43
170	D07AC	0.147	35	0.307	---	---	34
171	R05DA	-0.076	8	-0.306	---	---	25
172	J04AD	0.149	3	0.305	---	---	33
173	J01CF	-0.045	12	-0.304	---	---	25
174	L01XE	0.108	3	0.304	---	---	33
175	A02BA	-0.13	19	-0.303	---	---	26
176	M03BA	-0.031	7	-0.303	---	---	28
177	V04CG	-0.097	5	-0.302	---	---	40
178	J02AX	0.149	4	0.302	---	---	25
179	N06AA	0.128	46	0.3	---	---	30
180	J01BA	0.242	9	0.3	---	---	44
181	L01BA	-0.124	8	-0.298	---	---	25
182	C10AA	-0.081	12	-0.296	---	---	25
183	G03HA	-0.124	4	-0.294	---	---	25
184	A05AX	0.1	4	-0.293	---	---	0
185	N05AG	-0.117	8	-0.293	---	---	25
186	C02KC	-0.119	4	-0.291	---	---	25
187	S01HA	-0.154	26	-0.288	---	---	38
188	B02BX	-0.128	4	-0.288	---	---	25
189	A02BX	-0.129	14	-0.288	---	---	42
190	D03AX	0.029	8	0.288	---	---	25
191	S02DA	-0.095	5	-0.286	---	---	40
192	P01BA	-0.121	12	-0.284	---	---	33
193	R03BA	0.136	29	0.284	---	---	31
194	J04BA	0.15	10	0.281	---	---	40
195	C05AD	-0.14	32	-0.281	---	---	37
196	J01XE	0	5	0.281	---	---	0
197	R01AA	-0.073	16	-0.278	---	---	25
198	R01AB	-0.073	16	-0.278	---	---	25
199	N07XX	0.115	5	0.277	---	---	40
200	P02CC	-0.212	9	-0.277	---	---	44
201	M04AB	-0.014	11	-0.276	---	---	18
202	D05AD	-0.133	7	-0.275	---	---	42
203	D05BA	-0.133	7	-0.275	---	---	42
204	P02CB	0.003	4	0.274	---	---	25
205	N05AA	0.106	37	0.273	---	---	24
206	A04AD	-0.137	4	-0.272	---	---	25
207	N05CM	-0.137	4	-0.272	---	---	25
208	C02DA	0.042	5	0.272	---	---	40
209	V03AH	0.042	5	0.272	---	---	40
210	J01EC	0.022	10	0.27	---	---	30
211	M03CA	0.015	6	-0.27	---	---	16
212	R03DA	0.147	21	0.27	---	---	47
213	D01AE	0.004	21	-0.269	---	---	23
214	D10AD	-0.178	26	-0.269	---	---	42
215	A03AX	0	8	-0.269	---	---	0
216	D10BA	-0.015	4	-0.268	---	---	25
217	A11CC	-0.012	8	-0.267	---	---	12
218	S01GA	-0.07	20	-0.266	---	---	30
219	N05AL	-0.085	14	-0.265	---	---	42
220	N05AB	0.047	60	0.264	---	---	20
221	S01EX	-0.045	3	-0.264	---	---	33
222	A10BG	-0.035	41	-0.264	---	---	19
223	G03CC	0.188	17	0.259	---	---	41
224	G01AX	0.053	8	-0.257	---	---	12
225	N05BB	0.066	5	0.256	---	---	40
226	J04AK	-0.062	9	-0.255	---	---	22
227	D04AB	-0.058	30	-0.253	---	---	30
228	A01AC	0.121	16	0.253	---	---	25
229	J01DB	-0.117	22	-0.253	---	---	31
230	A08AB	-0.107	5	-0.252	---	---	40
231	M01AC	0.134	8	0.251	---	---	37
232	N03AF	-0.136	8	-0.251	---	---	37
233	D07AD	-0.05	8	0.25	---	---	12
234	M02AX	0.035	5	0.249	---	---	40
235	L04AA	-0.072	51	-0.248	---	---	15
236	G03AC	0.042	19	0.246	---	---	31
237	A05BA	-0.033	6	-0.246	---	---	16
238	R01AC	0.16	12	0.244	---	---	41
239	N01AX	-0.055	14	-0.243	---	---	21
240	J01DC	-0.029	35	-0.243	---	---	28
241	J01XC	0.072	4	0.243	---	---	25
242	R05DB	0.039	23	0.241	---	---	26
243	J01AA	-0.142	41	-0.241	---	---	34
244	N06DX	0.084	4	0.24	---	---	25
245	S03BA	0.156	16	0.238	---	---	37
246	V08AC	0.01	12	-0.238	---	---	16
247	A10BA	0.113	17	0.238	---	---	47
248	G04CA	0.147	9	0.236	---	---	44
249	L04AD	0.193	9	0.235	---	---	33
250	C04AX	0.08	37	0.235	---	---	35
251	D07XA	0.085	8	0.234	---	---	25
252	M01AX	-0.126	19	-0.233	---	---	36
253	J01ED	-0.087	23	-0.232	---	---	34
254	B03BA	-0.07	4	-0.231	---	---	25
255	A07EC	0.107	10	0.229	---	---	20
256	B01AA	0.062	15	0.229	---	---	40
257	L01AD	0.173	15	-0.229	---	---	6
258	G02CB	0.037	14	0.226	---	---	21
259	A03AB	-0.017	13	-0.226	---	---	30
260	A02BC	-0.059	8	-0.226	---	---	25
261	M01AE	-0.033	54	-0.225	---	---	29
262	N03AD	-0.007	8	-0.225	---	---	25
263	N02BE	-0.112	8	-0.223	---	---	37
264	R06AB	0.039	13	-0.222	---	---	15
265	M03BB	0.019	8	-0.218	---	---	25
266	A07EA	0.129	23	0.217	---	---	26
267	L01CD	0.095	6	-0.216	---	---	16
268	R01AD	0.139	42	0.215	---	---	33
269	H03BA	0.005	4	0.213	---	---	25
270	C01BB	0.024	15	-0.213	---	---	26
271	C09AA	-0.07	16	-0.212	---	---	31
272	S01GX	0.218	12	0.212	---	---	41
273	D09AA	0.185	18	0.21	---	---	38
274	C07AA	0.016	36	-0.209	---	---	25
275	S01AB	-0.024	13	-0.209	---	---	23
276	L04AX	-0.133	22	-0.208	---	---	31
277	C01EA	0.103	7	-0.208	---	---	14
278	C01BC	0.053	10	0.208	---	---	30
279	C03BA	-0.07	28	-0.204	---	---	28
280	D01BA	0.135	5	0.203	---	---	40
281	R02AB	0.123	8	0.2	---	---	37
282	C01BA	0.067	18	-0.2	---	---	11
283	G03CA	0.128	45	0.2	---	---	40
284	C10AB	-0.03	18	-0.199	---	---	27
285	N02BA	0.021	18	-0.198	---	---	16
286	C01EB	-0.077	12	-0.196	---	---	25
287	P01BX	0.145	3	0.196	---	---	33
288	D06AX	0.143	24	0.195	---	---	33
289	C02AC	0.01	16	0.194	---	---	12
290	A07AA	0.007	32	-0.194	---	---	15
291	S01FA	-0.091	23	-0.192	---	---	26
292	G01AA	0.074	19	0.191	---	---	26
293	C08CA	0.053	31	0.189	---	---	19
294	S02BA	0.131	19	0.189	---	---	31
295	C05AA	0.099	28	0.188	---	---	28
296	L01XX	-0.118	34	-0.187	---	---	35
297	S01AX	-0.046	30	-0.187	---	---	30
298	N03AG	0.055	60	0.187	---	---	25
299	S01EA	0.019	8	0.187	---	---	12
300	D07XB	0.131	23	0.185	---	---	34
301	J01GB	0.061	33	0.184	---	---	21
302	C03CA	0.133	16	0.181	---	---	37
303	R07AB	0.068	12	-0.181	---	---	8
304	N02BB	-0.041	19	-0.18	---	---	21
305	R06AE	-0.044	19	-0.18	---	---	21
306	R06AD	0.007	12	0.18	---	---	33
307	C07AB	0.102	21	0.179	---	---	33
308	L02BB	0.123	9	0.179	---	---	33
309	H02AA	0.083	12	-0.179	---	---	8
310	S01AA	-0.011	68	-0.178	---	---	20
311	J01EB	0.02	28	0.176	---	---	17
312	A07AB	-0.135	14	-0.176	---	---	28
313	D10AF	0.099	18	0.174	---	---	38
314	A03FA	0.124	24	0.174	---	---	33
315	P02BB	-0.005	5	-0.173	---	---	20
316	C08DA	-0.001	6	-0.173	---	---	33
317	N06AF	-0.06	25	-0.172	---	---	32
318	R02AD	0.039	13	-0.172	---	---	23
319	J01MB	-0.034	25	-0.171	---	---	20
320	A01AD	0.063	17	0.171	---	---	23
321	S01ED	0.157	16	0.171	---	---	37
322	J02AB	0.075	9	0.17	---	---	22
323	R06AA	0.068	23	-0.17	---	---	13
324	V08AB	0.086	26	0.169	---	---	38
325	G04BD	0.015	8	-0.168	---	---	12
326	B05CA	0.102	18	0.167	---	---	38
327	N04BC	-0.073	18	0.167	---	---	22
328	N02CA	0.064	10	0.166	---	---	30
329	A10BB	-0.069	41	-0.165	---	---	31
330	C01CA	0.098	35	0.162	---	---	34
331	S01EB	0.021	16	0.162	---	---	37
332	C04AE	0.073	9	0.161	---	---	22
333	R03CC	0.036	25	0.16	---	---	24
334	R03AC	0.04	21	0.159	---	---	23
335	J04AB	-0.031	11	-0.158	---	---	27
336	V03AB	0.039	18	0.158	---	---	38
337	C02CA	-0.067	14	-0.158	---	---	28
338	D07AA	0.06	12	0.157	---	---	25
339	S01CB	0.109	23	0.157	---	---	30
340	N05AH	0.005	21	-0.156	---	---	19
341	B01AC	-0.046	35	-0.156	---	---	22
342	D04AA	0.075	20	0.155	---	---	20
343	J05AB	0.064	23	-0.152	---	---	21
344	C04AB	0.025	12	-0.152	---	---	16
345	G02CA	-0.038	7	-0.151	---	---	28
346	J01FA	-0.053	37	-0.149	---	---	32
347	A07AC	0.032	5	0.148	---	---	20
348	M03BX	-0.056	22	-0.146	---	---	27
349	N04AA	0.022	20	-0.145	---	---	15
350	D07AB	0.094	27	0.144	---	---	29
351	A11HA	-0.068	11	-0.144	---	---	27
352	D01AC	0.008	35	0.143	---	---	20
353	G01AF	0.04	37	0.142	---	---	24
354	N06AX	0.033	18	0.142	---	---	27
355	D10AA	0.079	16	0.14	---	---	31
356	C01DX	0.078	21	-0.138	---	---	14
357	H02AB	0.081	40	0.135	---	---	25
358	J01CE	0.09	12	0.134	---	---	33
359	C03AA	0.048	24	-0.133	---	---	20
360	D01AA	0	12	0.129	---	---	16
361	A01AB	0	53	-0.129	---	---	24
362	S01AD	0.047	23	0.127	---	---	21
363	J01DD	-0.035	22	-0.125	---	---	18
364	N05AD	0.095	43	0.125	---	---	27
365	L02BA	0.029	47	0.122	---	---	25
366	D11AX	0.019	29	-0.12	---	---	20
367	N01BB	-0.025	23	-0.119	---	---	30
368	N06BX	-0.033	17	-0.118	---	---	29
369	M01AB	-0.014	49	-0.115	---	---	26
370	S01BA	0.008	45	0.115	---	---	17
371	S02AA	0.076	42	0.112	---	---	28
372	G03DC	0.069	19	0.112	---	---	26
373	S03AA	0.05	28	-0.108	---	---	21
374	S01EC	0.022	20	-0.104	---	---	25
375	G04BE	0.053	28	0.103	---	---	25
376	S01BC	0.034	30	-0.102	---	---	16
377	M02AA	0.008	83	-0.099	---	---	21
378	J01CA	0.015	41	0.079	---	---	26
